# Supplementary material
Source: publisher figshare collection journal article supplement (https://gsapubs.figshare.com/articles/dataset/_/12534962)
Supplement: Supplementary file 1 [file 1]

GSA Data Repository Item 2017151

Benson, T.R., Mahood, G.A., and Grove, M., 2017, Geology and  $^{40}\text{Ar}/^{39}\text{Ar}$  geochronology of the middle Miocene McDermitt volcanic field, Oregon and Nevada: Silicic volcanism associated with propagating flood basalt dikes at initiation of the Yellowstone hotspot: GSA Bulletin, doi:10.1130/B31642.1.

## **DATA REPOSITORY**

Appendix A: Methodology

Appendix B: J Factor Curves

Appendix C: Detailed Ar Data

Appendix D: Isochron Plots

Appendix E: Feldspar Compositions

Appendix F: WDXRF Chemistry

Appendix G: Mafic EDXRF Chemistry

Appendix H: Rhyolite EDXRF Chemistry

## APPENDIX A: METHODS

### Field Mapping

Ten months of field work involving geological mapping and sample collection were performed between 2012 and 2015 in the northern MVF and in adjacent areas of northern Nevada and southern Oregon. The majority of mapping was performed at the 1:24,000 scale in northern MVF, field-checking and remapping contacts previously mapped in published 7.5' quadrangles (Rytuba et al., 1982a-g; Rytuba and Curtis, 1983; Rytuba et al., 1983a-b; Peterson and Tegtmeier, 1987; Minor and Wager, 1989; Minor et al., 1989a-c). Our detailed mapping focused on the area around the Whitehorse Caldera of Rytuba et al. (1981) because our initial mapping and analytical work identified a set of older, more peralkaline rhyolite lava domes concentric to those associated with the Whitehorse Caldera. This set up a mapping and sampling strategy for subsequent field work, and led to the identification of two previously unidentified calderas in the map area, the Fish Creek and Pole Canyon calderas, as well as a more accurate delineation of the Whitehorse Caldera topographic and structural margins. The 1:150,000 geological map and cross section of northern McDermitt Volcanic Field (Fig. 6) is the result of the detailed mapping of these calderas. A relatively small amount of time was spent in southern MVF; our observations and conclusions from that area largely build upon the work of Rytuba and McKee (1984), Castor and Henry (2000), Starkel (2014), Henry et al. (2016), and James Rytuba (personal commun., 2012–2016).

### Detector Calibration Data

The plot below shows detector calibration data measured over the interval 11/07/2015 - 01/06/2016. No changes were made to instrument source or detector tuning during this interval. The values shown represent the quotient of a true argon isotopic ratio divided by the measured ratio. Each data point represents the mean value and  $1\sigma$  standard deviation of three successive measurements. Panels (A) thru (C) represent multicollection results from gas aliquots of a reference gas with  $^{39}\text{Ar} = 3 \times 10^{-15}$  mol/aliquot. Monocollection measurements performed with smaller aliquots of the same reference gas are shown in panels (D) thru (F). In the each panel, a weighted mean,  $2\sigma$  standard error, and MSWD have been calculated from the detrended data.

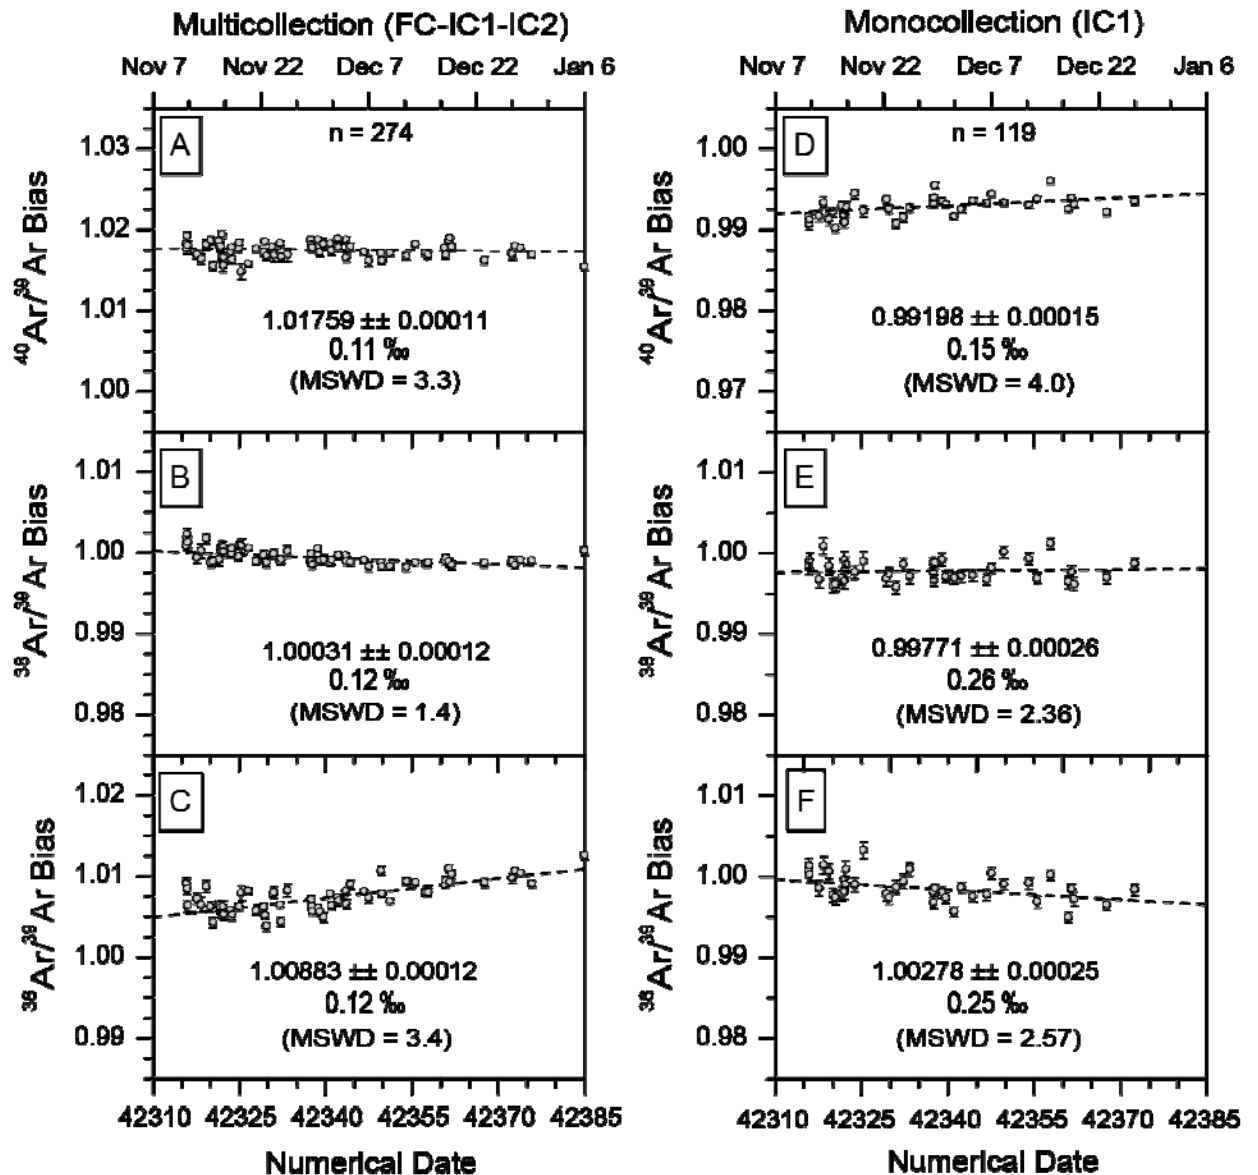

## Whole-Rock Geochemistry

We used a suite of relatively immobile major, minor, and trace elements analyzed by tabletop energy-dispersive XRF for the purposes of determining chemical zoning in ignimbrites, correlating isolated outcrops of ignimbrites, and assigning lavas to calderas based on chemical affinities to ignimbrites. About 300 whole-rock samples of lavas and ignimbrites from MVF were crushed with a sledgehammer and powdered to less than 175  $\mu\text{m}$  in an alumina ceramic grinding container using a SPEX shatterbox. Powders were analyzed using a Spectro Xepos He ED-XRF Spectrometer at Stanford University, and concentrations were determined using two separate calibrations with respect to USGS and internal standards: one for mafic to intermediate volcanic rocks and one for intermediate to felsic volcanic rocks<sup>1</sup>. Repeat analyses of samples for each calibration yielded reproducibility within 2% and concentrations agree with external

standard values within ~5% on average. ED-XRF data appear in Appendices G and H, with separate tabs in each file demonstrating agreement of measured values with accepted values for external standards.

Powders of representative samples were analyzed for major, minor, and trace elements via WD-XRF at Franklin and Marshall College. Results agree with ED-XRF values within 10% for most elements. WD-XRF data appear in Appendix F with a separate tab demonstrating the agreement of WD-XRF with ED-XRF data for a subset of the samples.

## **Electron Microscopy**

Mineral separates were mounted in epoxy, polished, and analyzed at the U.S. Geological Survey in Menlo Park, California: feldspar with 15 kV accelerating voltage and 10–30 nA beam current using the JEOL 8900 electron microprobe, and mafic minerals using EDS on the Tescan VEGA3 scanning electron microscope. Feldspar compositions appear in Appendix E.

## **Estimation of Volumes of Tuffs and Lavas of McDermitt Volcanic Field**

Calculation of volumes of caldera-forming eruptions typically involves summation of the volumes of intracaldera ignimbrite, outflow ignimbrite, and plinian fall deposits, surges, and co-ignimbrite fall deposits associated with the eruption (e.g., Rose and Chesner, 1987; Wilson, 2001; Mason et al., 2004; Cook et al., 2016). Such an approach is not feasible for MVF, given that non-welded portions of the eruptive products are not preserved except where overlain by densely welded tuff or younger lava flows.

Instead, we provide rough estimates for intracaldera volume by taking the area of the mapped calderas and multiplying them by an estimated 1 km thickness for the calderas more than 15 km in diameter (Fish Creek, Pole Canyon, and McDermitt calderas) and 0.5 km for the smaller Whitehorse Caldera. We use 1 km for the larger calderas because that is the approximate thickness of intracaldera tuff exposed in the similarly sized Mid-Miocene Rooster Comb Caldera of the Lake Owyhee Volcanic Field (Benson and Mahood, 2016) and the similarly alkali rhyolite Otowai member of Bandelier Tuff from similarly-sized Valles Caldera (Cook et al., 2016). We assume that the intracaldera tuff in these calderas is densely welded and therefore do not adjust for dense rock equivalence. We use a thickness of 0.5 km for Tuff of Whitehorse Creek, given its smaller diameter and drilling results near the edge of the caldera where only few hundred meters of tuff were encountered. Many assumptions are involved in this estimate, including the degree of intracaldera welding and the possibility that collapse is trapdoor or piecemeal (e.g., Lipman, 1997), any combination of which may have occurred during eruption of the tuffs of Oregon Canyon, Trout Creek Mountains, Long Ridge, and Whitehorse Creek given our physical and chemical observations. We stress that our calculations of intracaldera volumes are only rough estimates.

We adopt a similar approach to Wilson (2001) to estimate the volume of outflow tuff by taking the aerial extent of outflow ignimbrite and multiplying it by the average thickness of the sheet. We do not favor an estimation based on isopach maps of the outflow sheet because our mapping has shown that the thicknesses of tuffs do not uniformly decrease with distance from the vents due to the significant paleotopographic relief imposed by basaltic and trachyandesitic shield volcanoes that now form the Oregon Canyon and Trout Creek mountains. For example, in the northern Trout Creek Mountains, barely any Tuff of Long Ridge is exposed atop the

topographic high formed by pre-Tuff-of-Oregon-Canyon mafic and intermediate lavas, yet 5 km to the east, in the paleovalley between the trachyandesitic stratocones of the Trout Creek and Oregon Canyon Mountains, the tuff reaches thicknesses as great as 30 m.

Given that few ash fall or surge deposits are preserved in MVF, we cannot use empirical methods to estimate the volume of co-ignimbrite fall and surge deposits (e.g., Pyle, 1989; Fierstein and Nathenson, 1992; Bonadonna and Houghton, 2005). Some workers suggest using a ratio of outflow:fall deposits of 1:1 (Sparks and Walker, 1977; Mason et al., 2004), while others recommend that this ratio be used with caution (Cook et al., 2016). Where volumes have been estimated in detail in younger, well-preserved systems, this ratio is accurate within an order of magnitude (1000:800 in the Toba Tuff; Rose and Chesner, 1987; 320:430 in the Oruanui Tuff; Wilson, 2001; 89:65 in the Otowai member of the Bandelier Tuff; Cook et al., 2016). However, given that eruptions of peralkaline silicic magmas generally result in fall deposits of limited aerial extent (Mahood, 1984) and less fine ash that can be elutriated from pyroclastic flows, we conservatively approximate the volume of fall deposits as 25% of the outflow volume.

As listed in Table 3, we estimate the volumes of tuffs sourced from MVF as 510 km<sup>3</sup> (Tuff of Oregon Canyon), 660 km<sup>3</sup> (Tuff of Trout Creek Mountains), 1080 km<sup>3</sup> (Tuff of Long Ridge, and 110 km<sup>3</sup> (Tuff of Whitehorse Creek). These estimates are in close agreement with the estimates of Rytuba and Conrad (1981), Rytuba and McKee (1984), and Henry et al. (2016).

Estimating the volume of rhyolite lavas is more straightforward because lavas are more resistant to erosion than nonwelded tuffs. The rhyolite lavas form edifices that are roughly conical in shape; hence, their volumes can be estimated by calculating the volume of a cone using the height and approximate radius of the lava dome. Table 3 lists the approximate volumes of rhyolite lavas in McDermitt Volcanic Field using this method.

To obtain the volume of moderate-viscosity intermediate lavas, we combined the 400 km<sup>3</sup> estimated for the shield volcanoes in the Trout Creek and Oregon Canyon Mountains, modeled as idealized cones centered at the summits of each mountain range, and ~10 km<sup>3</sup> of erupted from many vents over an area of ~100 km<sup>2</sup> in the vicinity of Tule Rims (Table 3), for a total of 410 km<sup>3</sup>.

## REFERENCES CITED

- Benson, T.R., and Mahood, G.A., 2016, Geology of the mid-Miocene Rooster Comb caldera and Lake Owyhee volcanic field, eastern Oregon: Silicic volcanism associated with Grande Ronde flood basalt: *Journal of Volcanology and Geothermal Research*, v. 309, p. 96–117, doi:10.1016/j.jvolgeores.2015.11.011.
- Bonadonna, C., and Houghton, B.F., 2005, Total grain-size distribution and volume of tephra-fall deposits: *Bulletin of Volcanology*, v. 67, no. 5, p. 441–456, doi:10.1007/s00445-004-0386-2.
- Castor, S.B., and Henry, C.D., 2000, Geology, geochemistry, and origin of volcanic rock-hosted uranium deposits in northwestern Nevada and southeastern Oregon, USA: *Ore Geology Reviews*, v. 16, no. 1–2, p. 1–40, doi:10.1016/S0169-1368(99)00021-9.
- Cook, G.W., Wolff, J.A., and Self, S., 2016, Estimating the eruptive volume of a large pyroclastic body: the Otowi Member of the Bandelier Tuff, Valles caldera, New Mexico: *Bulletin of Volcanology*, v. 78, no. 2, p. 1–11, doi:10.1007/s00445-016-1000-0.
- Fierstein, J., and Nathenson, M., 1992, Another look at the calculation of fallout tephra volumes: *Bulletin of Volcanology*, v. 54, no. 2, p. 156–167, doi:10.1007/BF00278005.

- Henry, D., Castor, S.B., Starkel, W.A., Ellis, B.S., Wolff, J.A., McIntosh, W.C., and Heizler, M.T., 2016, Preliminary Geologic Map of the McDermitt Caldera, Humboldt County, Nevada, and Harney and Malheur Counties, Oregon: Nevada Bureau of Mines and Geology Open-File Report 16-1, p. 1-8.
- Lipman, P.W., 1997, Subsidence of ash-flow calderas: relation to caldera size and magma-chamber geometry: *Bulletin of Volcanology*, v. 59, no. 3, p. 198-218, doi:10.1007/s004450050186.
- Mahood, G.A., 1984, Pyroclastic rocks and calderas associated with strongly peralkaline magmatism: *Journal of Geophysical Research*, v. 89, no. B10, p. 8540-8552, doi:10.1029/JB089iB10p08540.
- Mason, B.G., Pyle, D.M., and Oppenheimer, C., 2004, The size and frequency of the largest explosive eruptions on Earth: *Bulletin of Volcanology*, v. 66, no. 8, p. 735-748, doi:10.1007/s00445-004-0355-9.
- Minor, S.A., and Wager, M., 1989, Geologic Map of the Trident Peak SE Quadrangle, Humboldt County, Nevada: U.S. Geological Survey Open-File Report 89-561, scale 1:24,000.
- Minor, S.A., Vander Meulen, D.B., Rytuba, J.J., and Vercourtere, T.L., 1989a, Geologic Map of The V Quadrangle, Harney County, Oregon: U.S. Geological Survey Open-File Report 89-351, scale 1:24,000.
- Minor, S.A., Vander Meulen, D.B., Rytuba, J.J., and Vercourtere, T.L., 1989b, Geologic Map of the Windy Point Quadrangle, Harney County, Oregon: U.S. Geological Survey Open-File Report 89-212, scale 1:24,000.
- Minor, S.A., Wager, M., and Harwood, C.S., 1989c, Geologic Map of the Trident Peak SW Quadrangle, Humboldt County, Nevada: U.S. Geological Survey Open-File Report 89-447, scale 1:24,000.
- Peterson, J.A., and Tegtmeier, K.J., 1987, Geologic Map of the Dry Creek Bench Quadrangle, Malheur County, Oregon: U.S. Geological Survey Miscellaneous Field Studies Map MF-1940, scale 1:24,000.
- Pyle, D.M., 1989, The thickness, volume and grainsize of tephra fall deposits: *Bulletin of Volcanology*, v. 51, p. 1-15, doi:10.1007/BF01086757.
- Rose, W.I., and Chesner, C.A., 1987, Dispersal of ash in the great Toba eruption, 75 ka: *Geology*, v. 15, no. 10, p. 913-917, doi:10.1130/0091-7613(1987)15<913:DOAITG>2.0.CO;2.
- Rytuba, J.J., and Conrad, W.K., 1981, Petrochemical Characteristics of Volcanic Rocks Associated with Uranium Deposits In The McDermitt Caldera Complex: Tulsa, Oklahoma, *Studies in Geology*, v. 13, p. 63-72.
- Rytuba, J.J., and Curtis, D.L., 1983, Geologic Map of the Oregon Canyon 3NW Quadrangle, Malheur County, Oregon: U.S. Geological Survey Miscellaneous Field Studies Map MF-1473, scale 1:24,000.
- Rytuba, J.J., and McKee, E.H., 1984, Peralkaline ash flow tuffs and calderas of the McDermitt volcanic field, southeast Oregon and north central Nevada: *Journal of Geophysical Research*, v. 89, p. 8616-8628, doi:10.1029/JB089iB10p08616.
- Rytuba, J.J., Minor, S.A., and McKee, E.H., 1981, Geology of the Whitehorse Caldera and Caldera-Fill Deposits, Malheur County, Oregon: U.S. Geological Survey Open-File Report 81-1092, 19 p.

- Rytuba, J.J., Minor, S.A., Conrad, W.K., and Vander Meulen, D.B., 1982a, Geologic Map of the Trout Creek Canyon Quadrangle, Harney County, Oregon: U.S. Geological Survey Open-File Report 83–281, scale 1:24,000.
- Rytuba, J.J., Minor, S.A., Miller, R.J., and Vander Meulen, D.B., 1982b, Geologic Map of the Red Lookout Butte Quadrangle, Harney County, Oregon: U.S. Geological Survey Open-File Report 83–283, scale 1:24,000.
- Rytuba, J.J., Minor, S.A., Miller, R.J., and Vander Meulan, D.B., 1982c, Geologic Map of the Red Mountain Quadrangle, Harney County, Oregon: U.S. Geological Survey Open-File Report 83–282, scale 1:24,000.
- Rytuba, J.J., Minor, S.A., and Vander Meulen, D.B., 1982d, Geologic Map of the Whitehorse Ranch Quadrangle, Harney and Malheur Counties, Oregon: U.S. Geological Survey Open-File Report 83–284, scale 1:24,000.
- Rytuba, J.J., Minor, S.A., and Vander Meulen, D.B., 1982e, Geologic Map of the Pole Canyon Quadrangle, Harney County, Oregon: U.S. Geological Survey Open-File Report 83–285, scale 1:24,000.
- Rytuba, J.J., Vander Meulen, D.B., Vercourtere, T.L., and Minor, S.A., 1982f, Reconnaissance Geologic Map of the Borax Lake Quadrangle, Harney County, Oregon: U.S. Geological Survey Open-File Report 82–1126, scale 1:24,000.
- Rytuba, J.J., Vander Meulen, D.B., Vercourtere, T.L., Minor, S.A., Caress, M.E., and Kriens, B.J.C., 1982g, Reconnaissance Geologic Map of the Tum Tum Lake Quadrangle, Harney County, Oregon: U.S. Geological Survey Open-File Report 82–1127, scale 1:24,000.
- Rytuba, J.J., Bateson, J.T., Curtis, D.L.R., and Cox, G.A., 1983a, Geologic Map of the Doolittle Creek Quadrangle, Malheur County, Oregon: U.S. Geological Survey Miscellaneous Field Studies Map MF-1471, scale 1:24,000.
- Rytuba, J.J., Bateson, J.T., Curtis, D.L.R., and Cox, G.A., 1983b, Geologic Map of the Little Whitehorse Creek Quadrangle, Harney and Malheur Counties, Oregon: U.S. Geological Survey Miscellaneous Field Studies Map MF-1472, scale 1:24,000.
- Sparks, R.S.J., and Walker, G.P.L., 1977, The significance of vitric-enriched air-fall ashes associated with crystal-enriched ignimbrites: *Journal of Volcanology and Geothermal Research*, v. 2, no. 4, p. 329–341, doi:10.1016/0377-0273(77)90019-1.
- Starkel, W.A., 2014, Mapping, Geologic Evolution and Petrogenesis of the McDermitt Caldera Center, Northern Nevada & Southern Oregon, USA [Ph.D. thesis]: Pullman, Washington, Washington State University, 393 p.
- Wilson, C.J., 2001, The 26.5 ka Oruanui eruption, New Zealand: an introduction and overview: *Journal of Volcanology and Geothermal Research*, v. 112, no. 1-4, p. 133–174, doi:10.1016/S0377-0273(01)00239-6.

<sup>1</sup>Calibrated elements include: CaO, TiO<sub>2</sub>, MnO, FeO\*, Cu, Zn, Ga, Rb, Sr, Y, Zr, Nb, Ba, La, Ce, Nd, Th, U (felsic calibration) and P<sub>2</sub>O<sub>5</sub>, K<sub>2</sub>O, CaO, TiO<sub>2</sub>, FeO\*, V, Cr, Ni, Cu, Zn, Sr, Y, Zr, Nb, Ba, Ce (mafic calibration).

Appendix B: J-factor curves from Irradiation 12

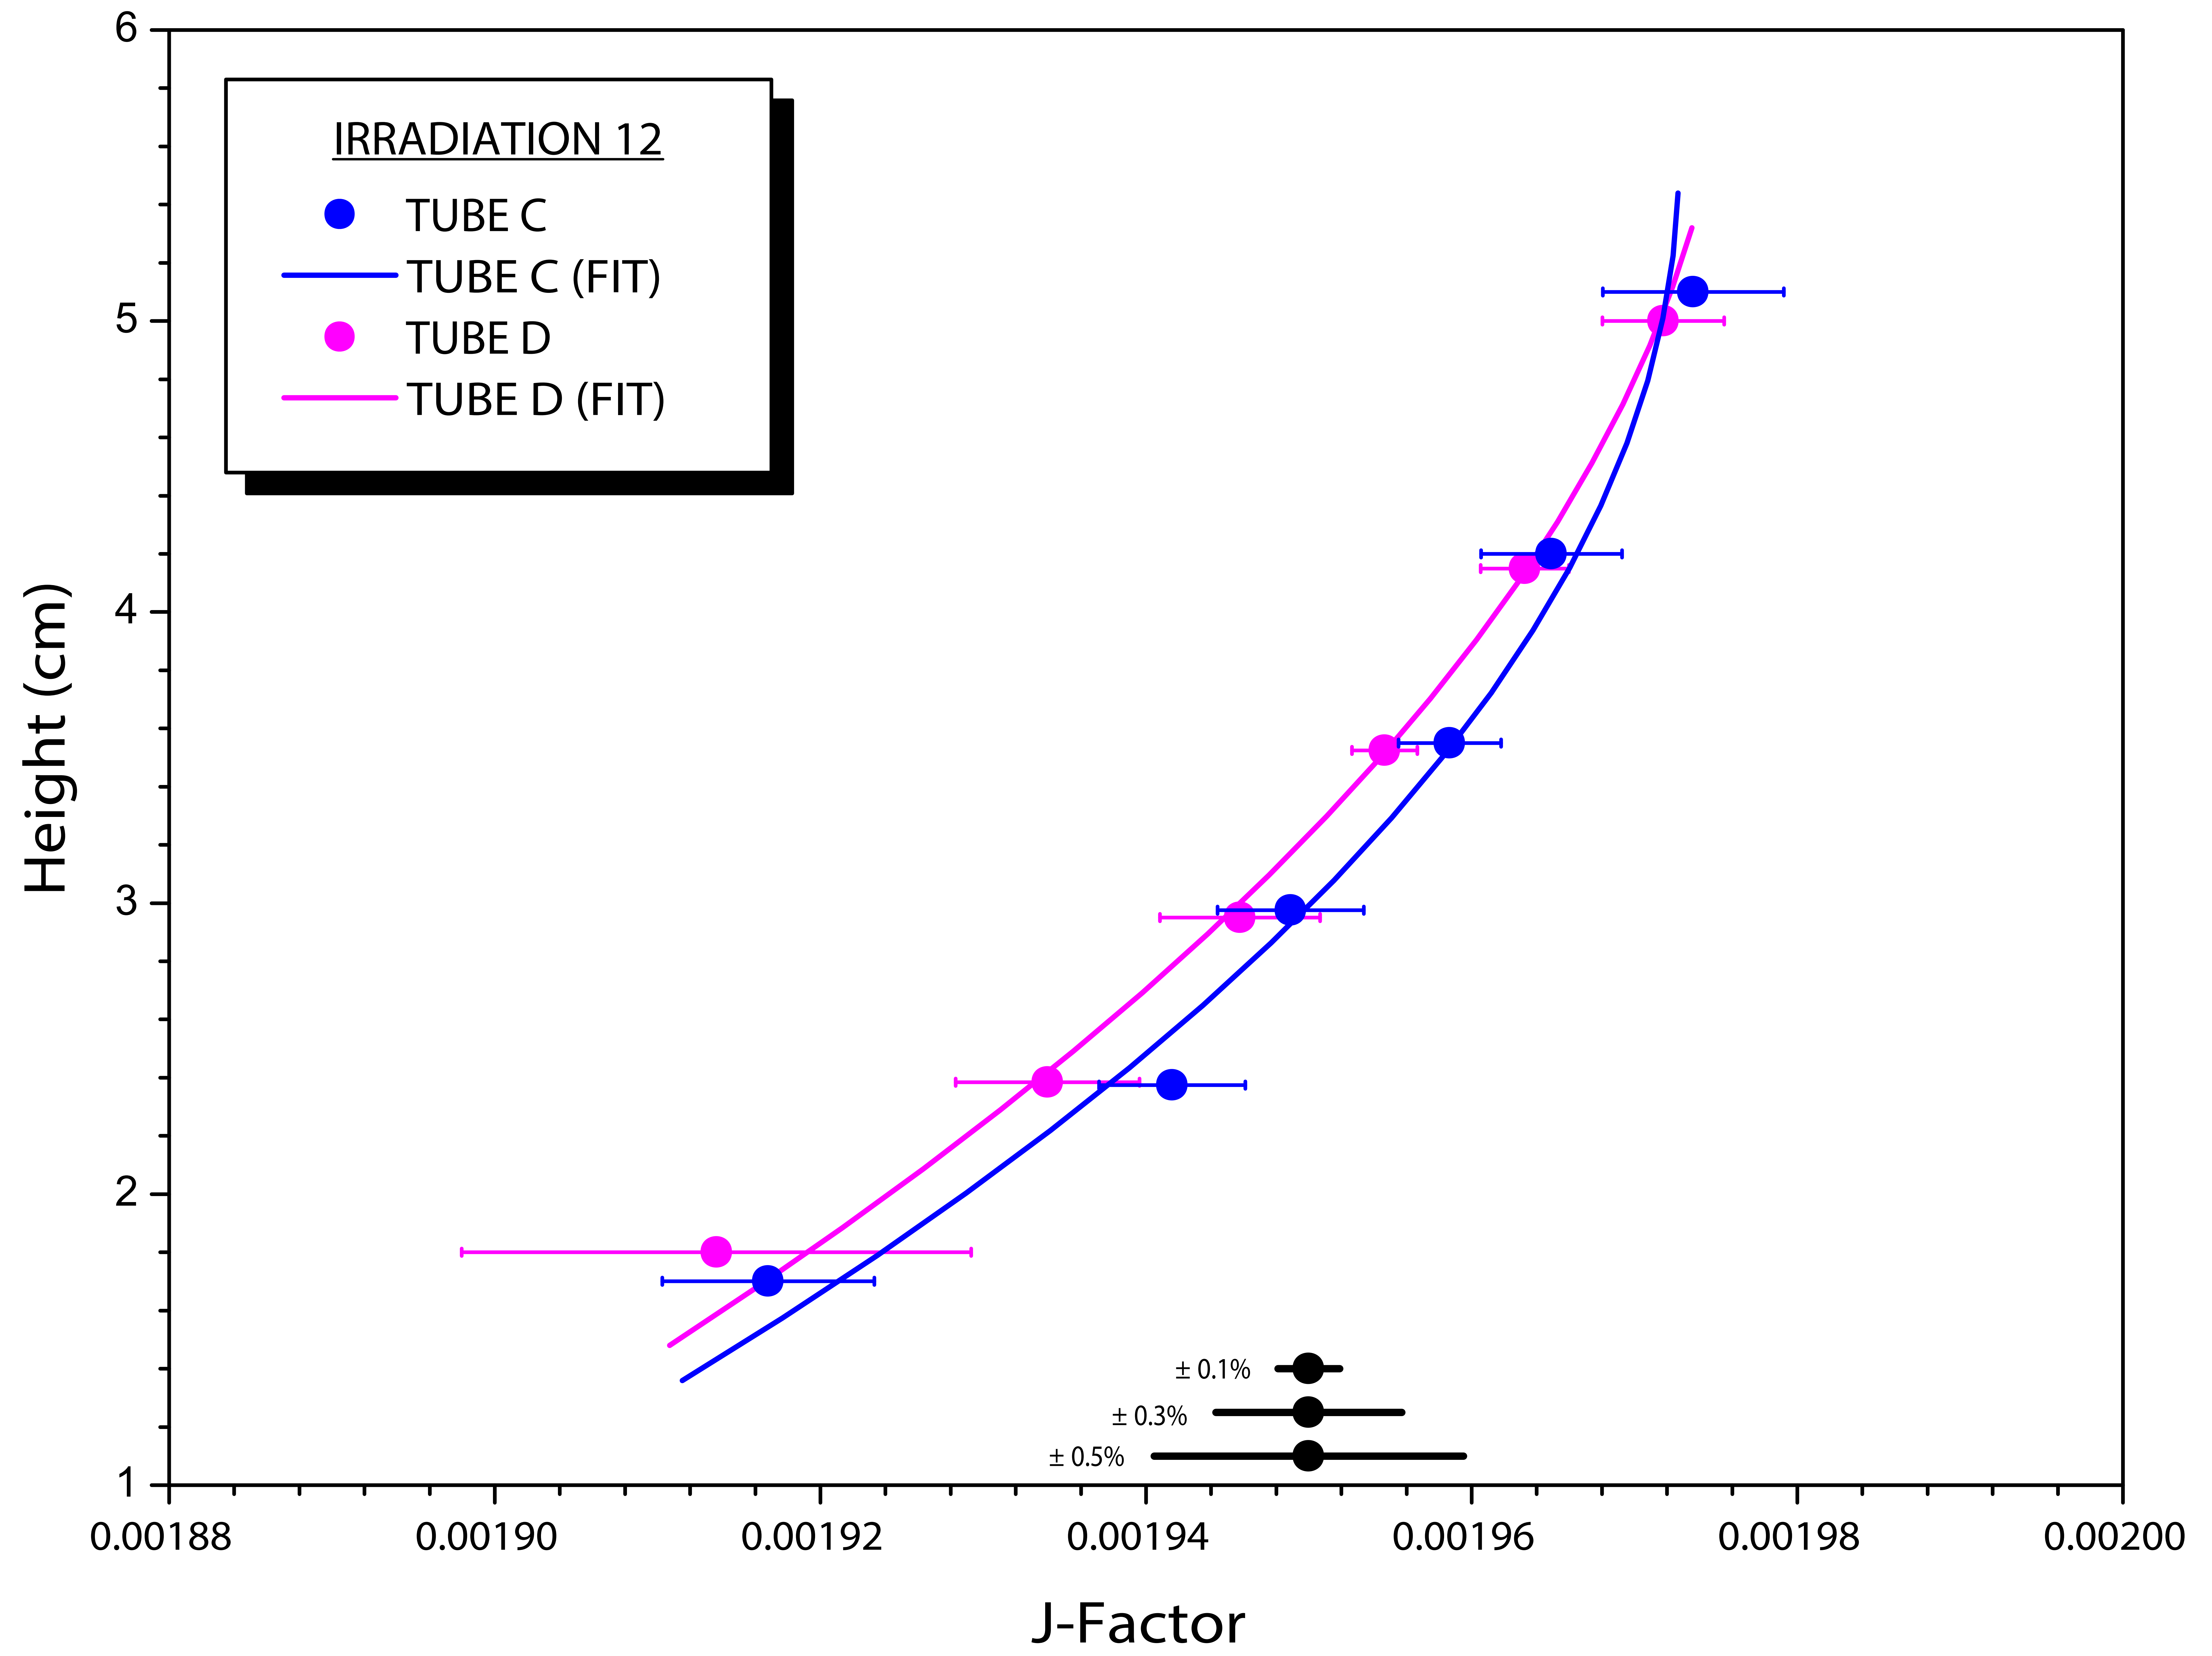



## Appendix C: Detailed $^{40}\text{Ar}/^{39}\text{Ar}$ Data

### *Notes on Appendix C:*

Tabs in this Appendix are organized by Irradiation ID.

All reported ages are calculated relative to a Fish Canyon sanidine age of 28.02 Ma and a decay constant of  $\lambda = 5.543 \times 10^{-10}/\text{yr}$  (Steiger and Jäger, 1977).

\* indicates grains excluded from calculation of inverse isochron age

Inverse isochron plots and atmospheric ratios used for each sample appear in Appendix D: Isochron Plots

### Irradiation constants:

|                                                      |                       |                   |
|------------------------------------------------------|-----------------------|-------------------|
| $^{40}\text{Ar}/^{39}\text{ArK}$ Correction Factor:  | $7.23\text{E-}03 \pm$ | $7.84\text{E-}04$ |
| $^{38}\text{Ar}/^{39}\text{ArK}$ Correction Factor:  | $1.27\text{E-}02 \pm$ | $1.70\text{E-}05$ |
| $^{36}\text{Ar}/^{37}\text{ArCa}$ Correction Factor: | $2.84\text{E-}04 \pm$ | $4.00\text{E-}06$ |
| $^{39}\text{Ar}/^{37}\text{ArCa}$ Correction Factor: | $7.09\text{E-}04 \pm$ | $2.21\text{E-}06$ |

# Tuff of Long Ridge (EW-210)

$16.305 \pm \pm 0.022$  Ma

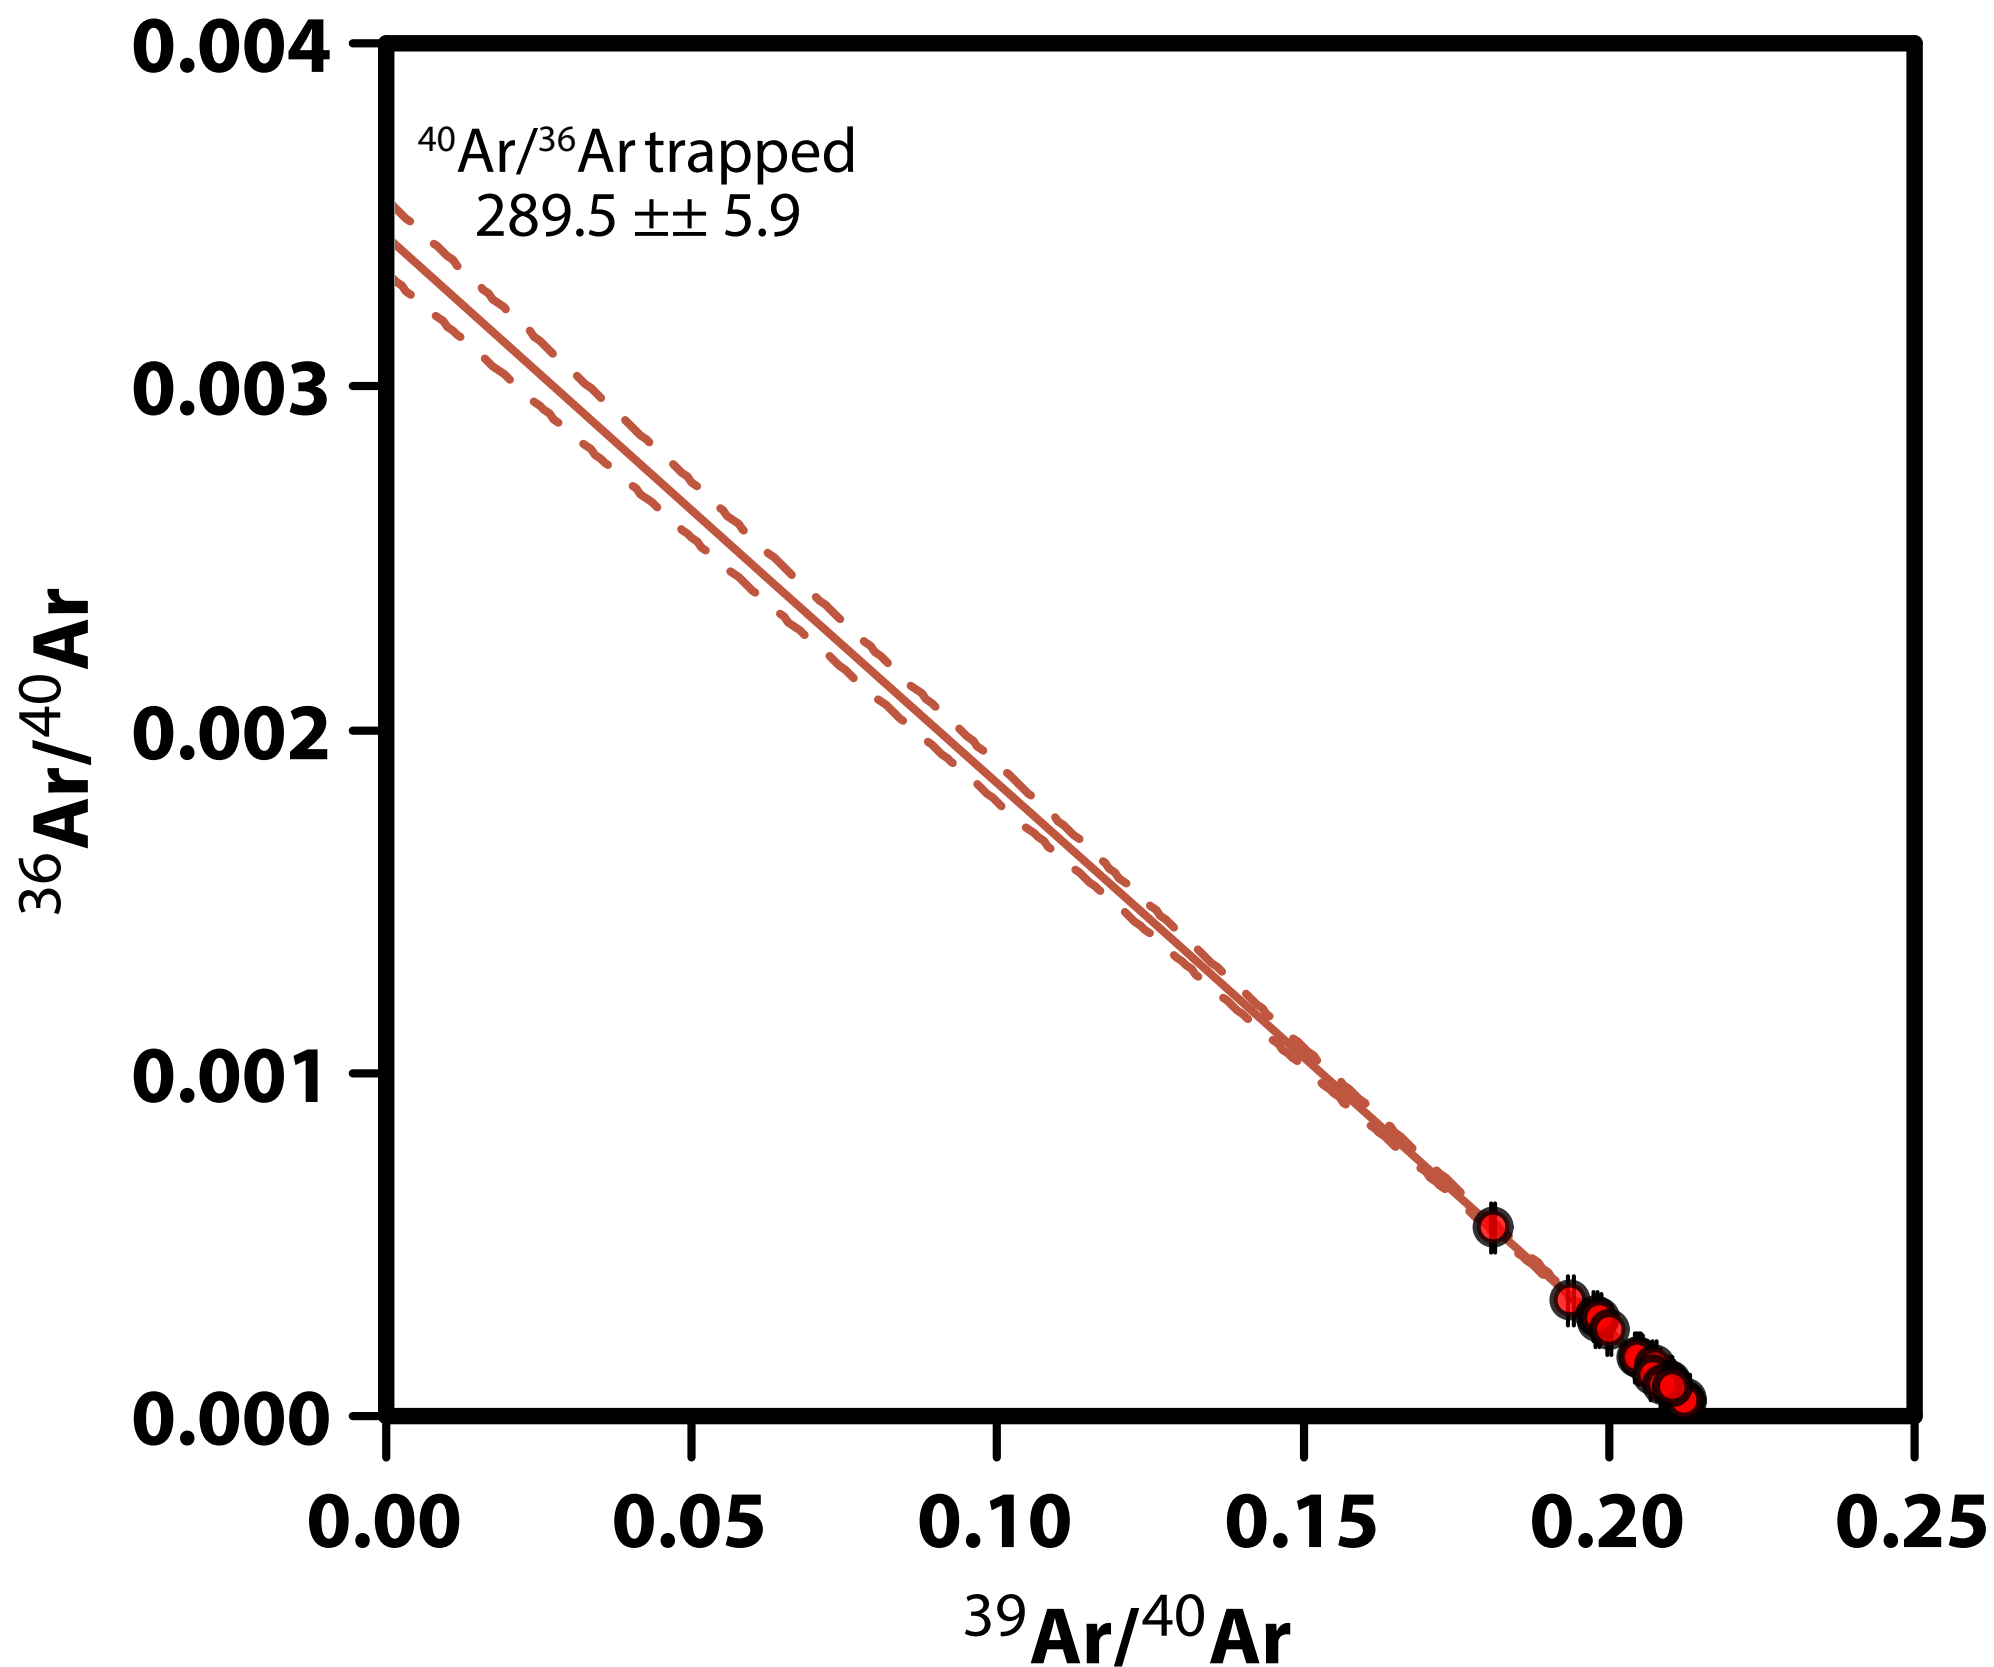

Tuff of Trout Creek Mtns (EW-210)  
16.305  $\pm$  0.022 Ma

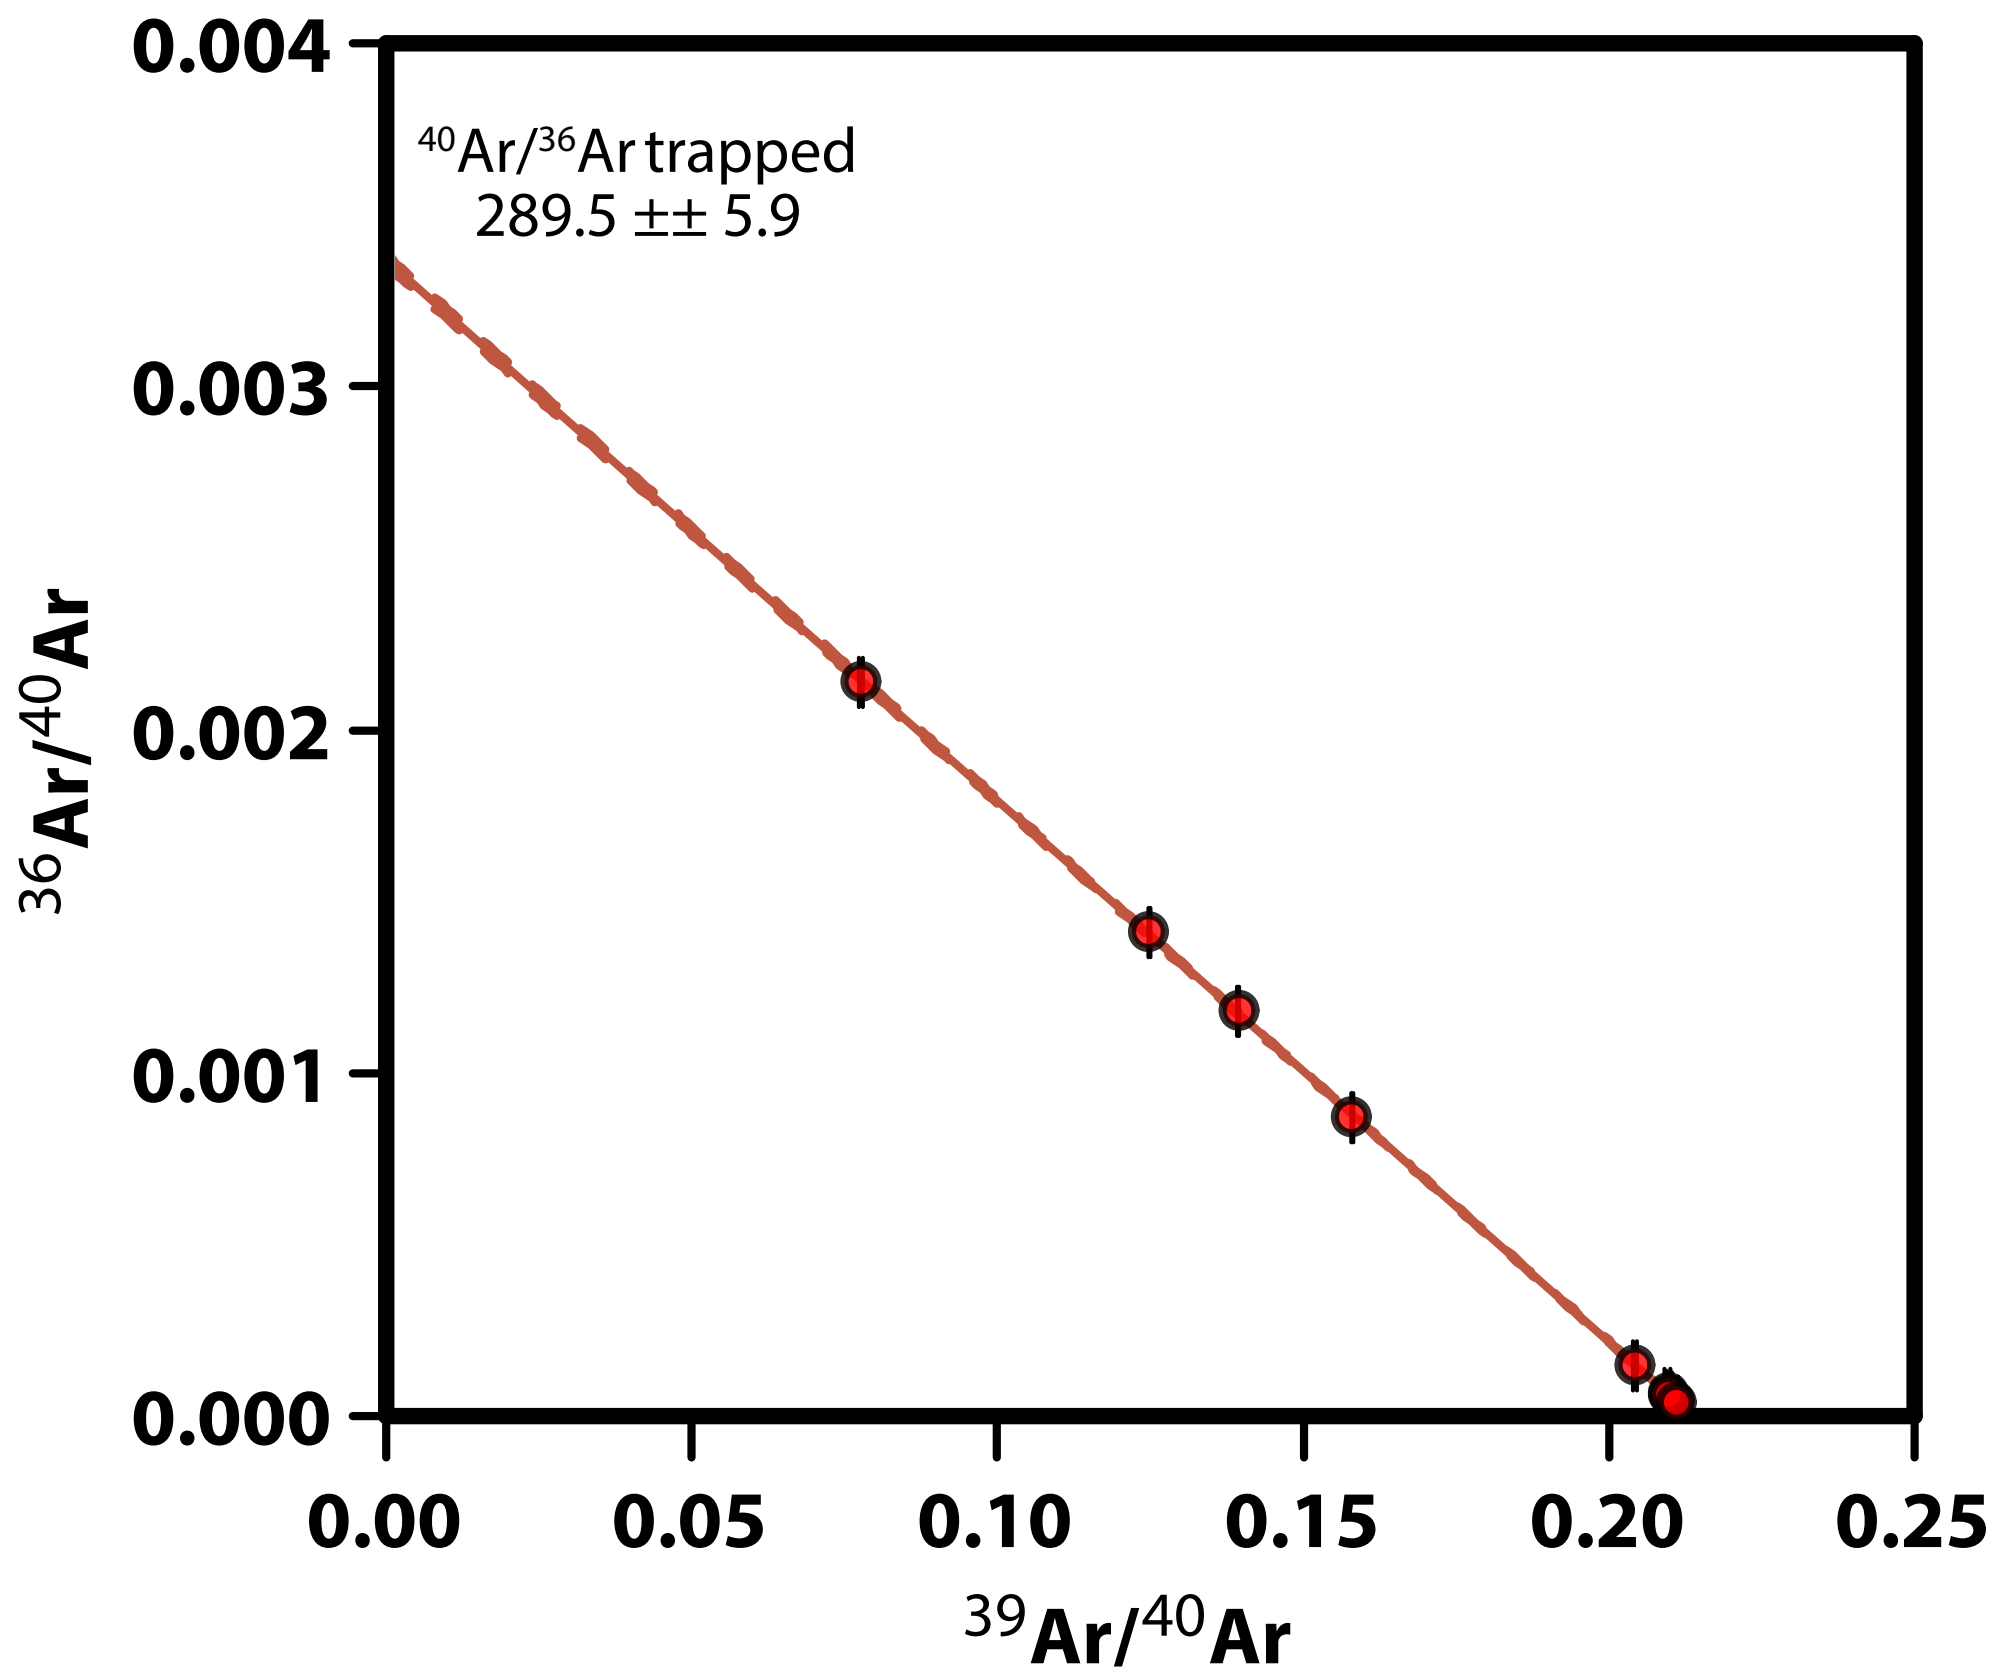

# Tuff of Oregon Canyon (MC-407B)

$16.484 \pm \pm 0.022$  Ma

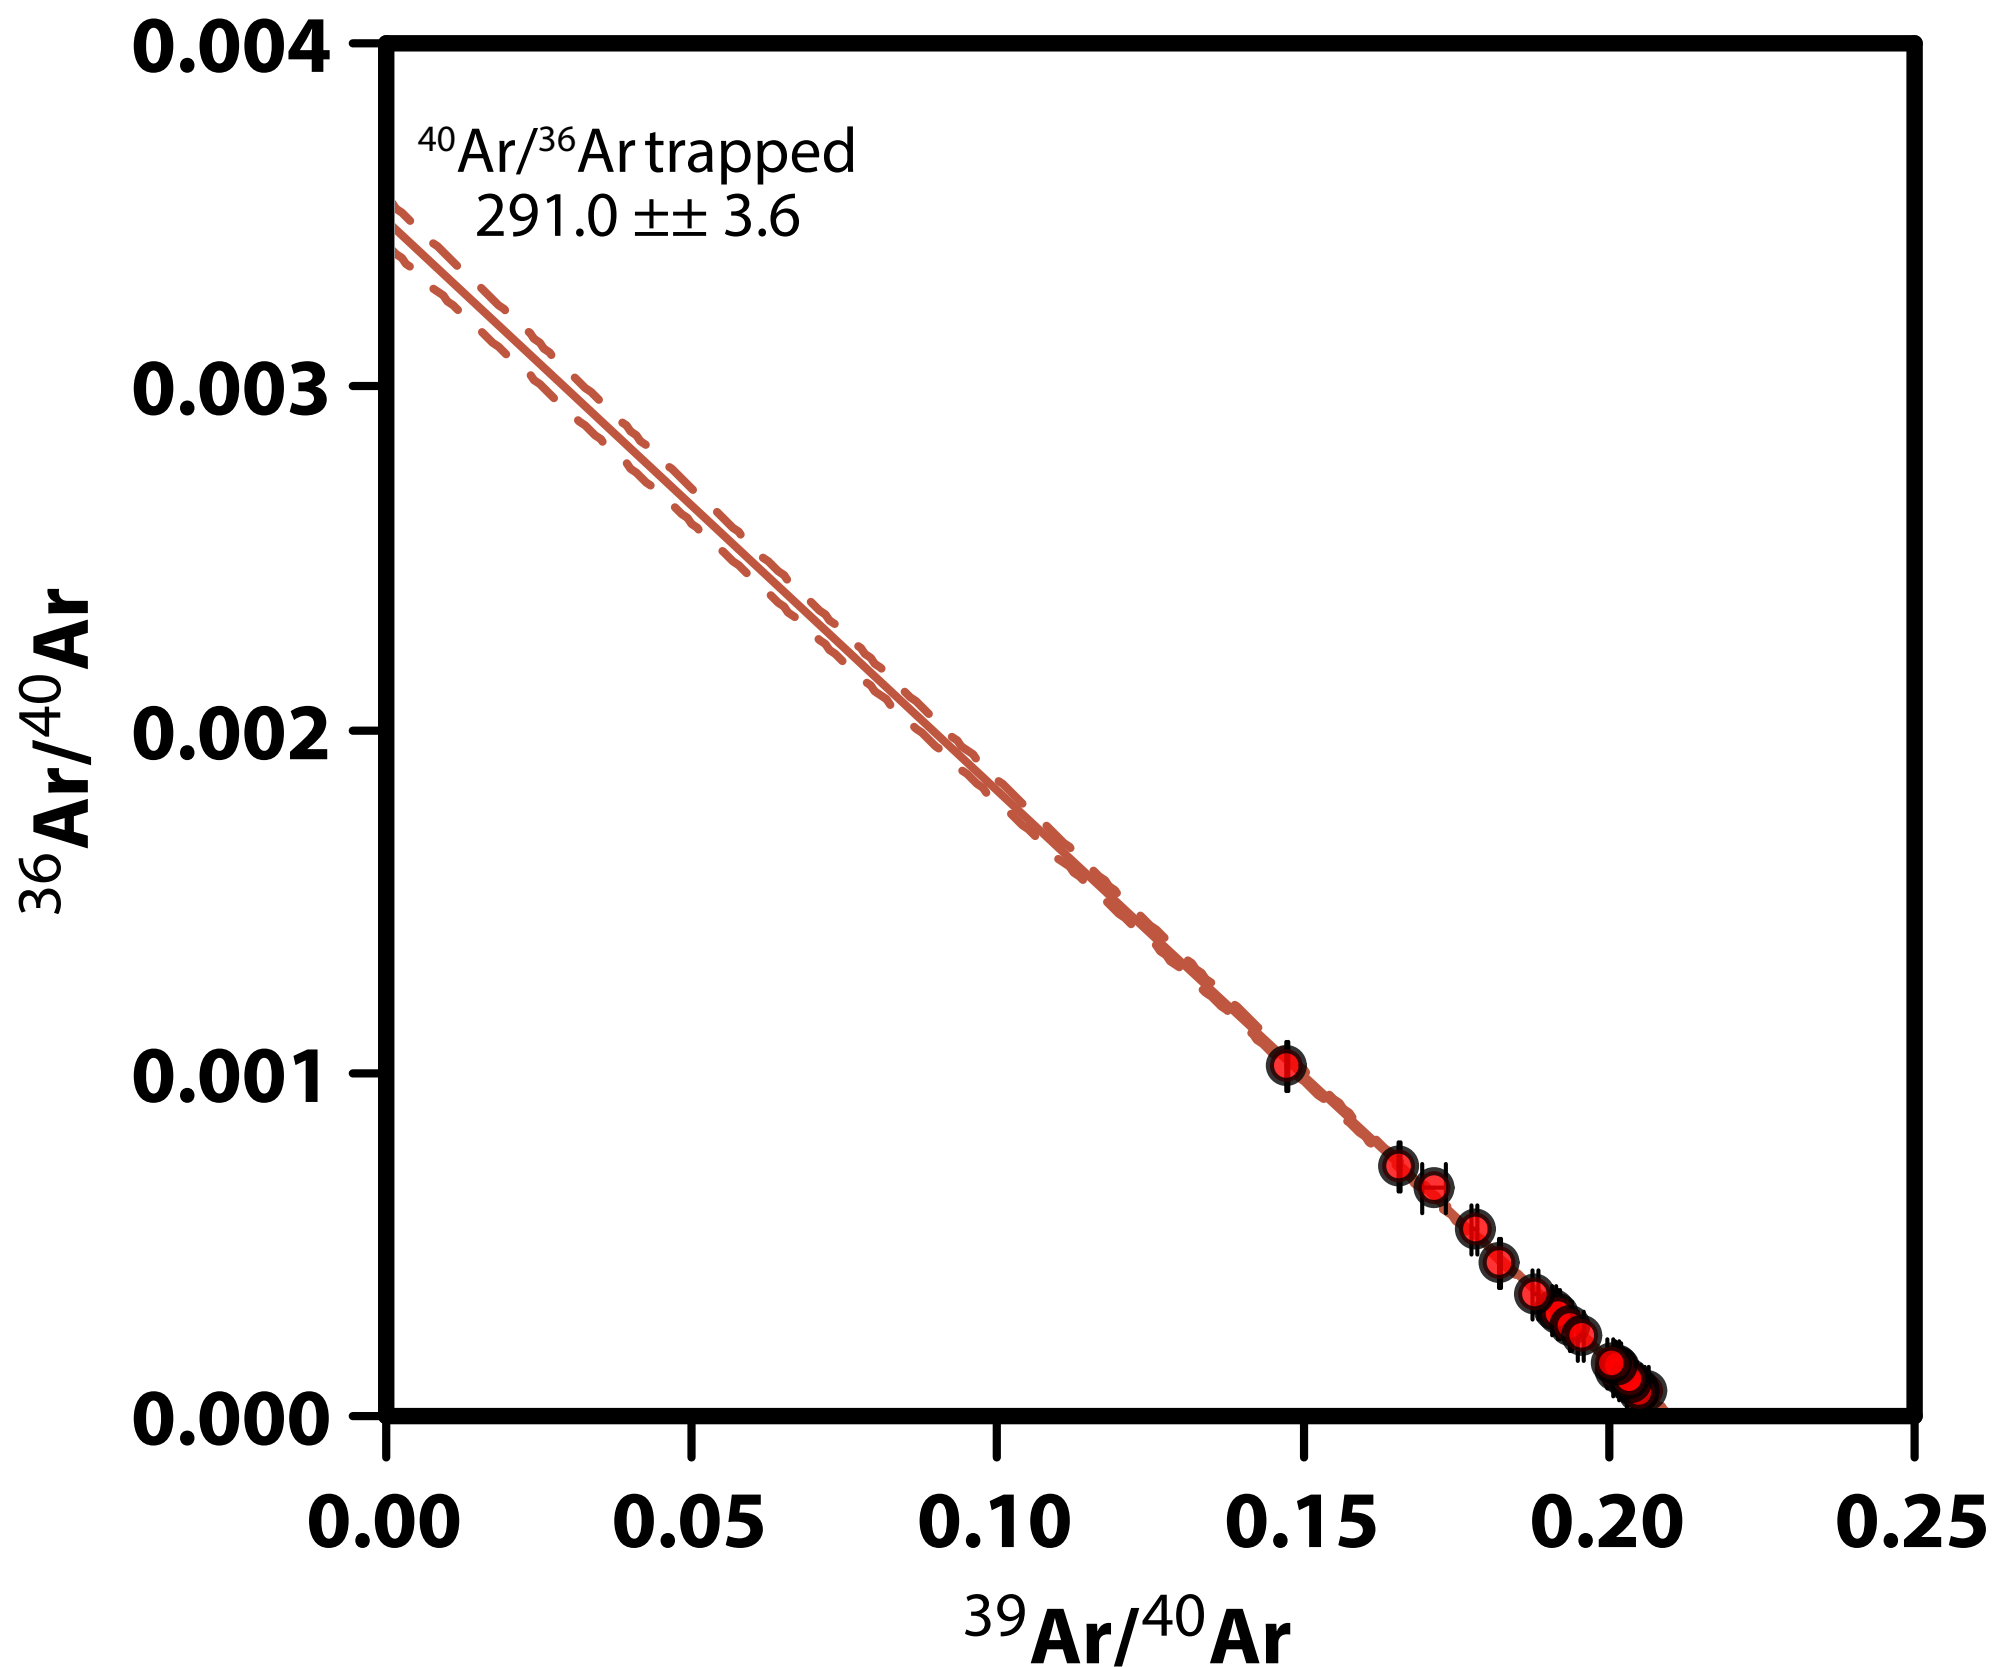

# Tuff of Oregon Canyon (ML-304)

$16.494 \pm \pm 0.017$  Ma

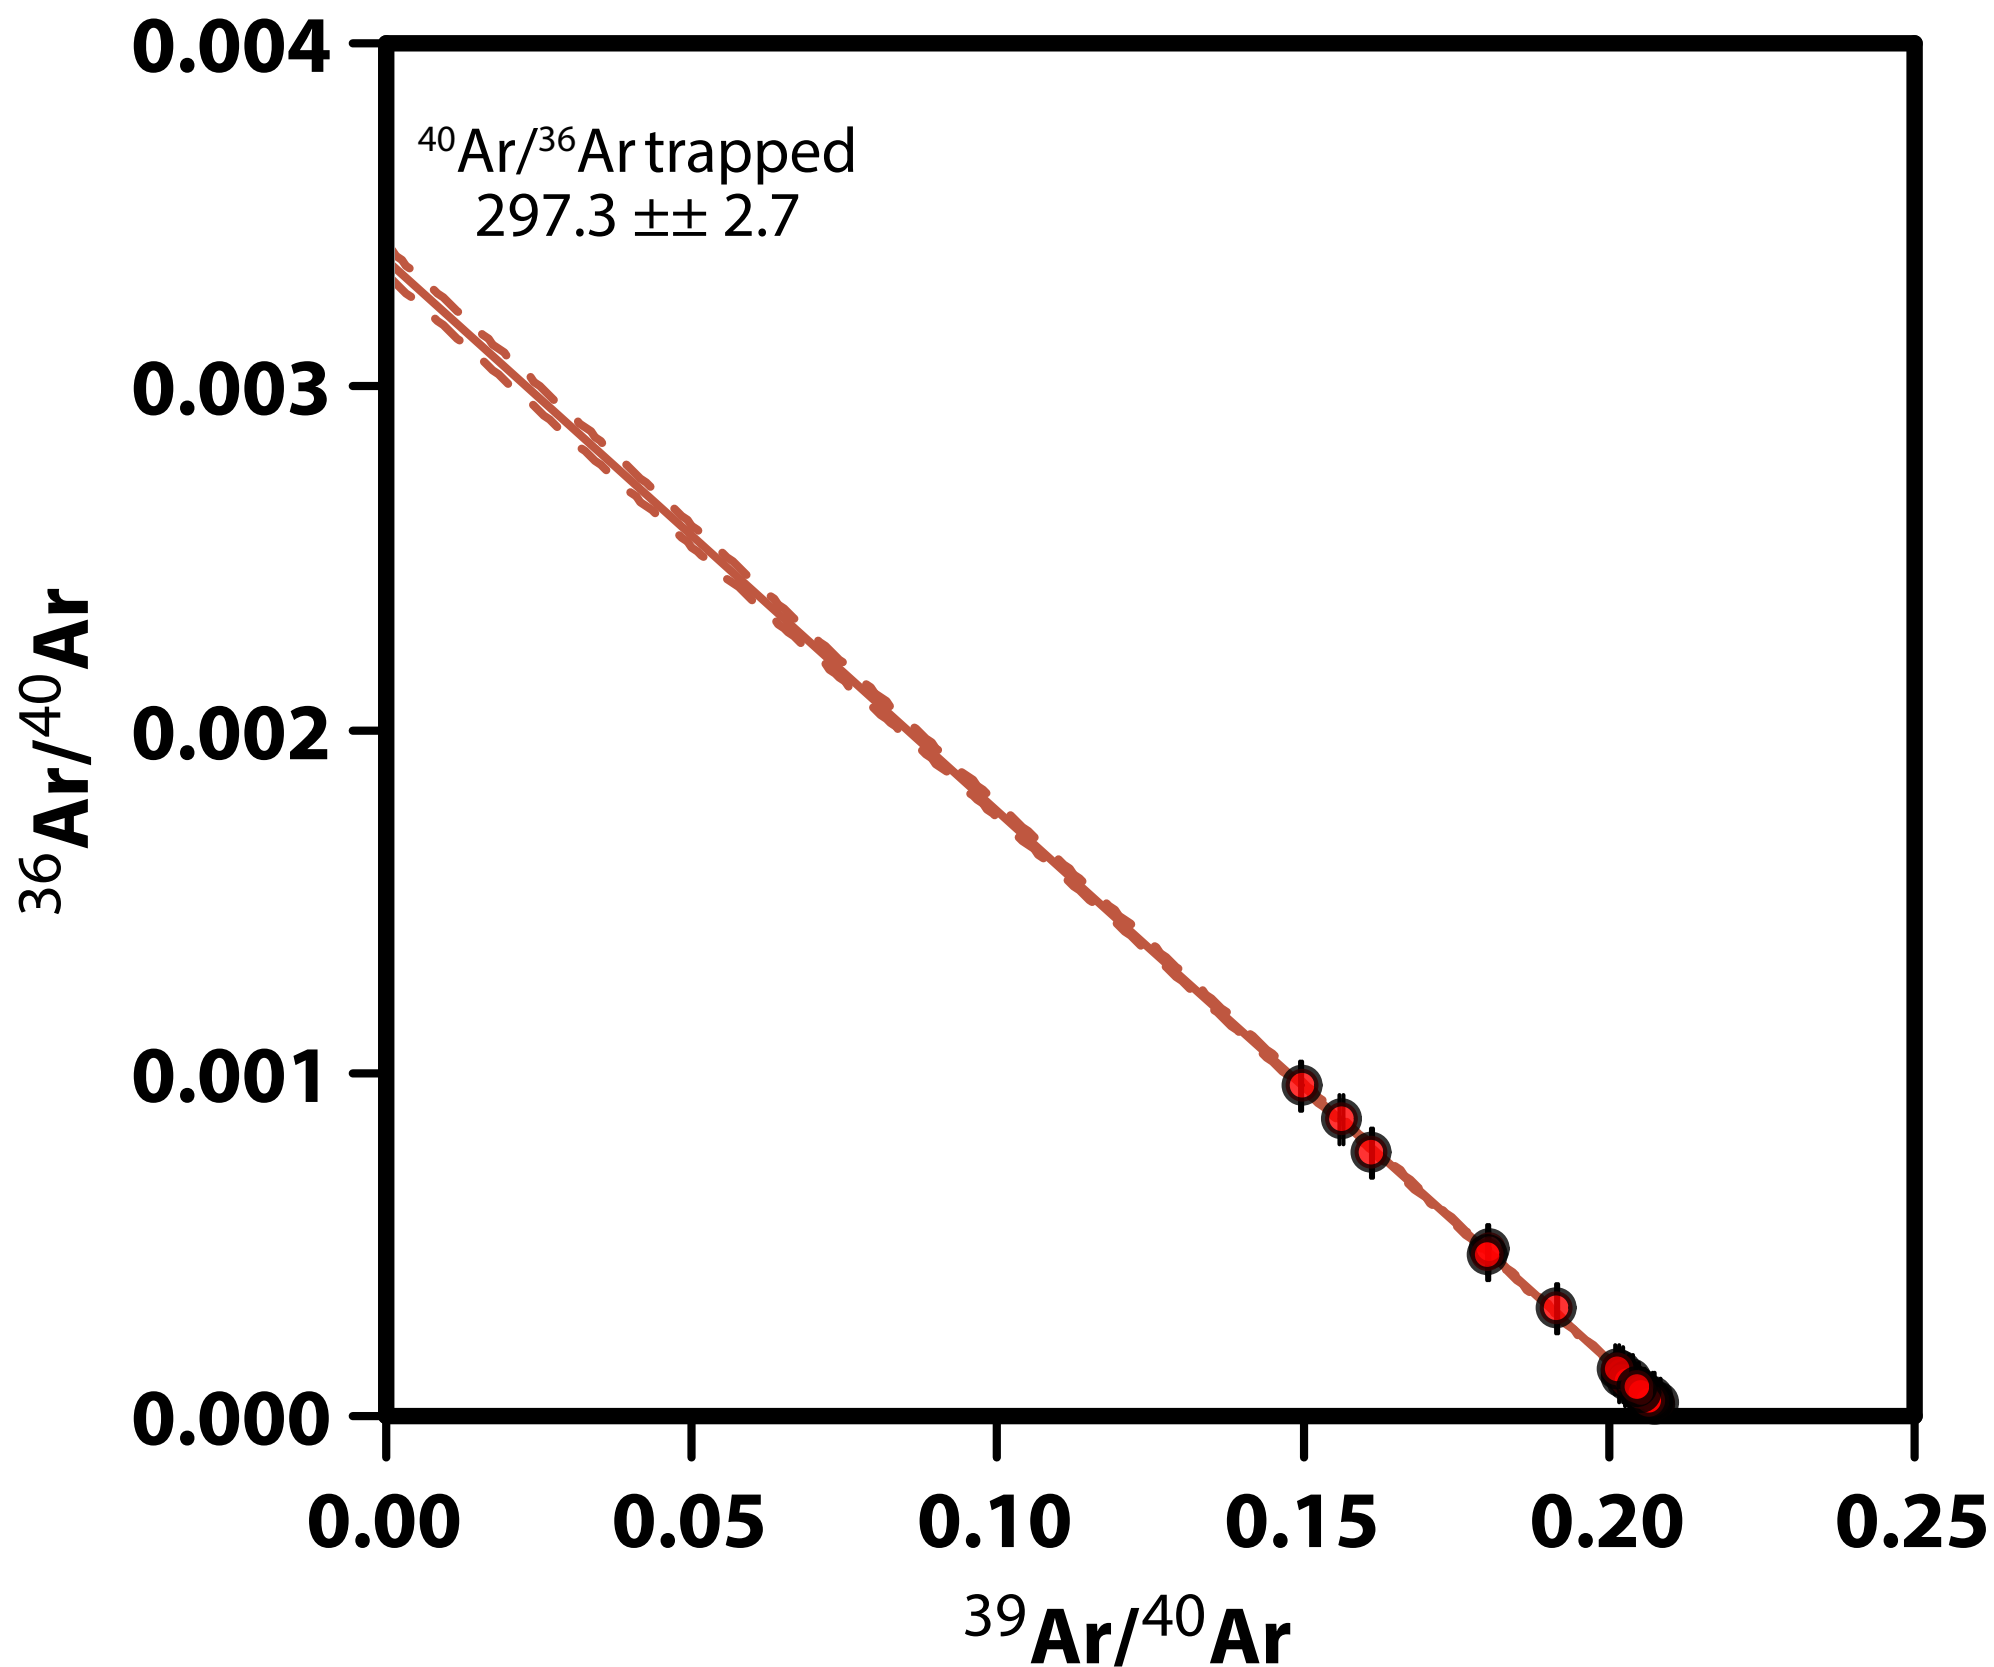

# Tuff of Oregon Canyon (TB-224)

$16.467 \pm \pm 0.033$  Ma

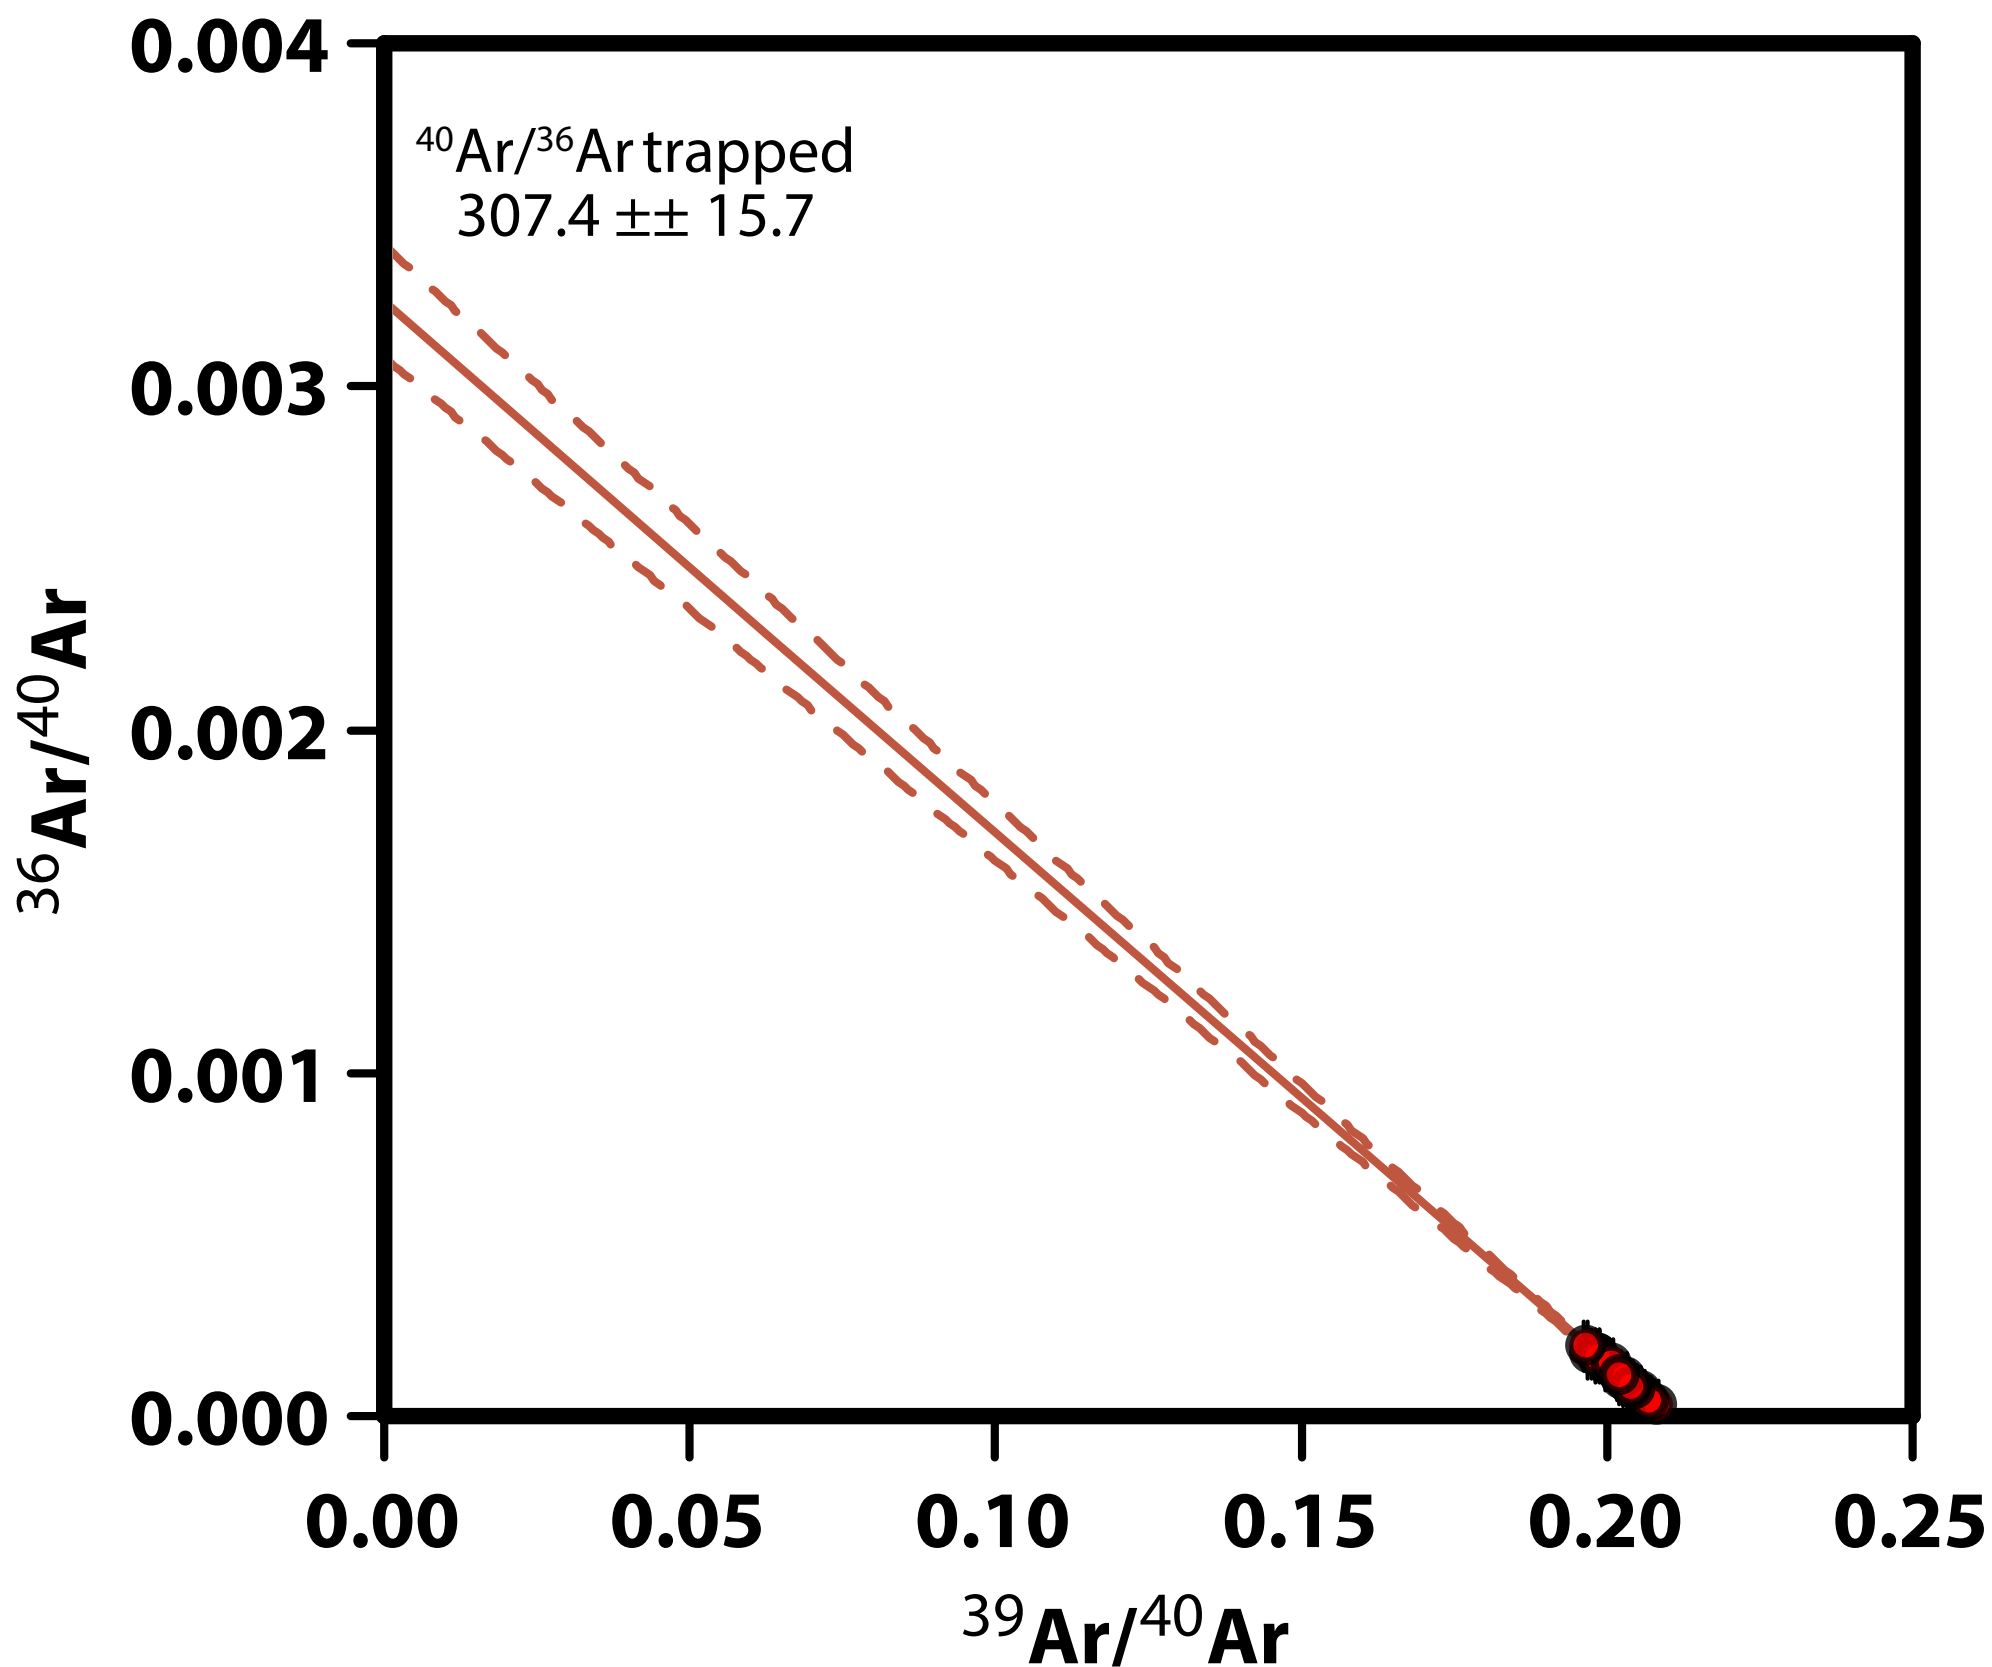

Tuff of Trout Creek Mtns (TB-225A)  
16.423  $\pm$  0.021 Ma

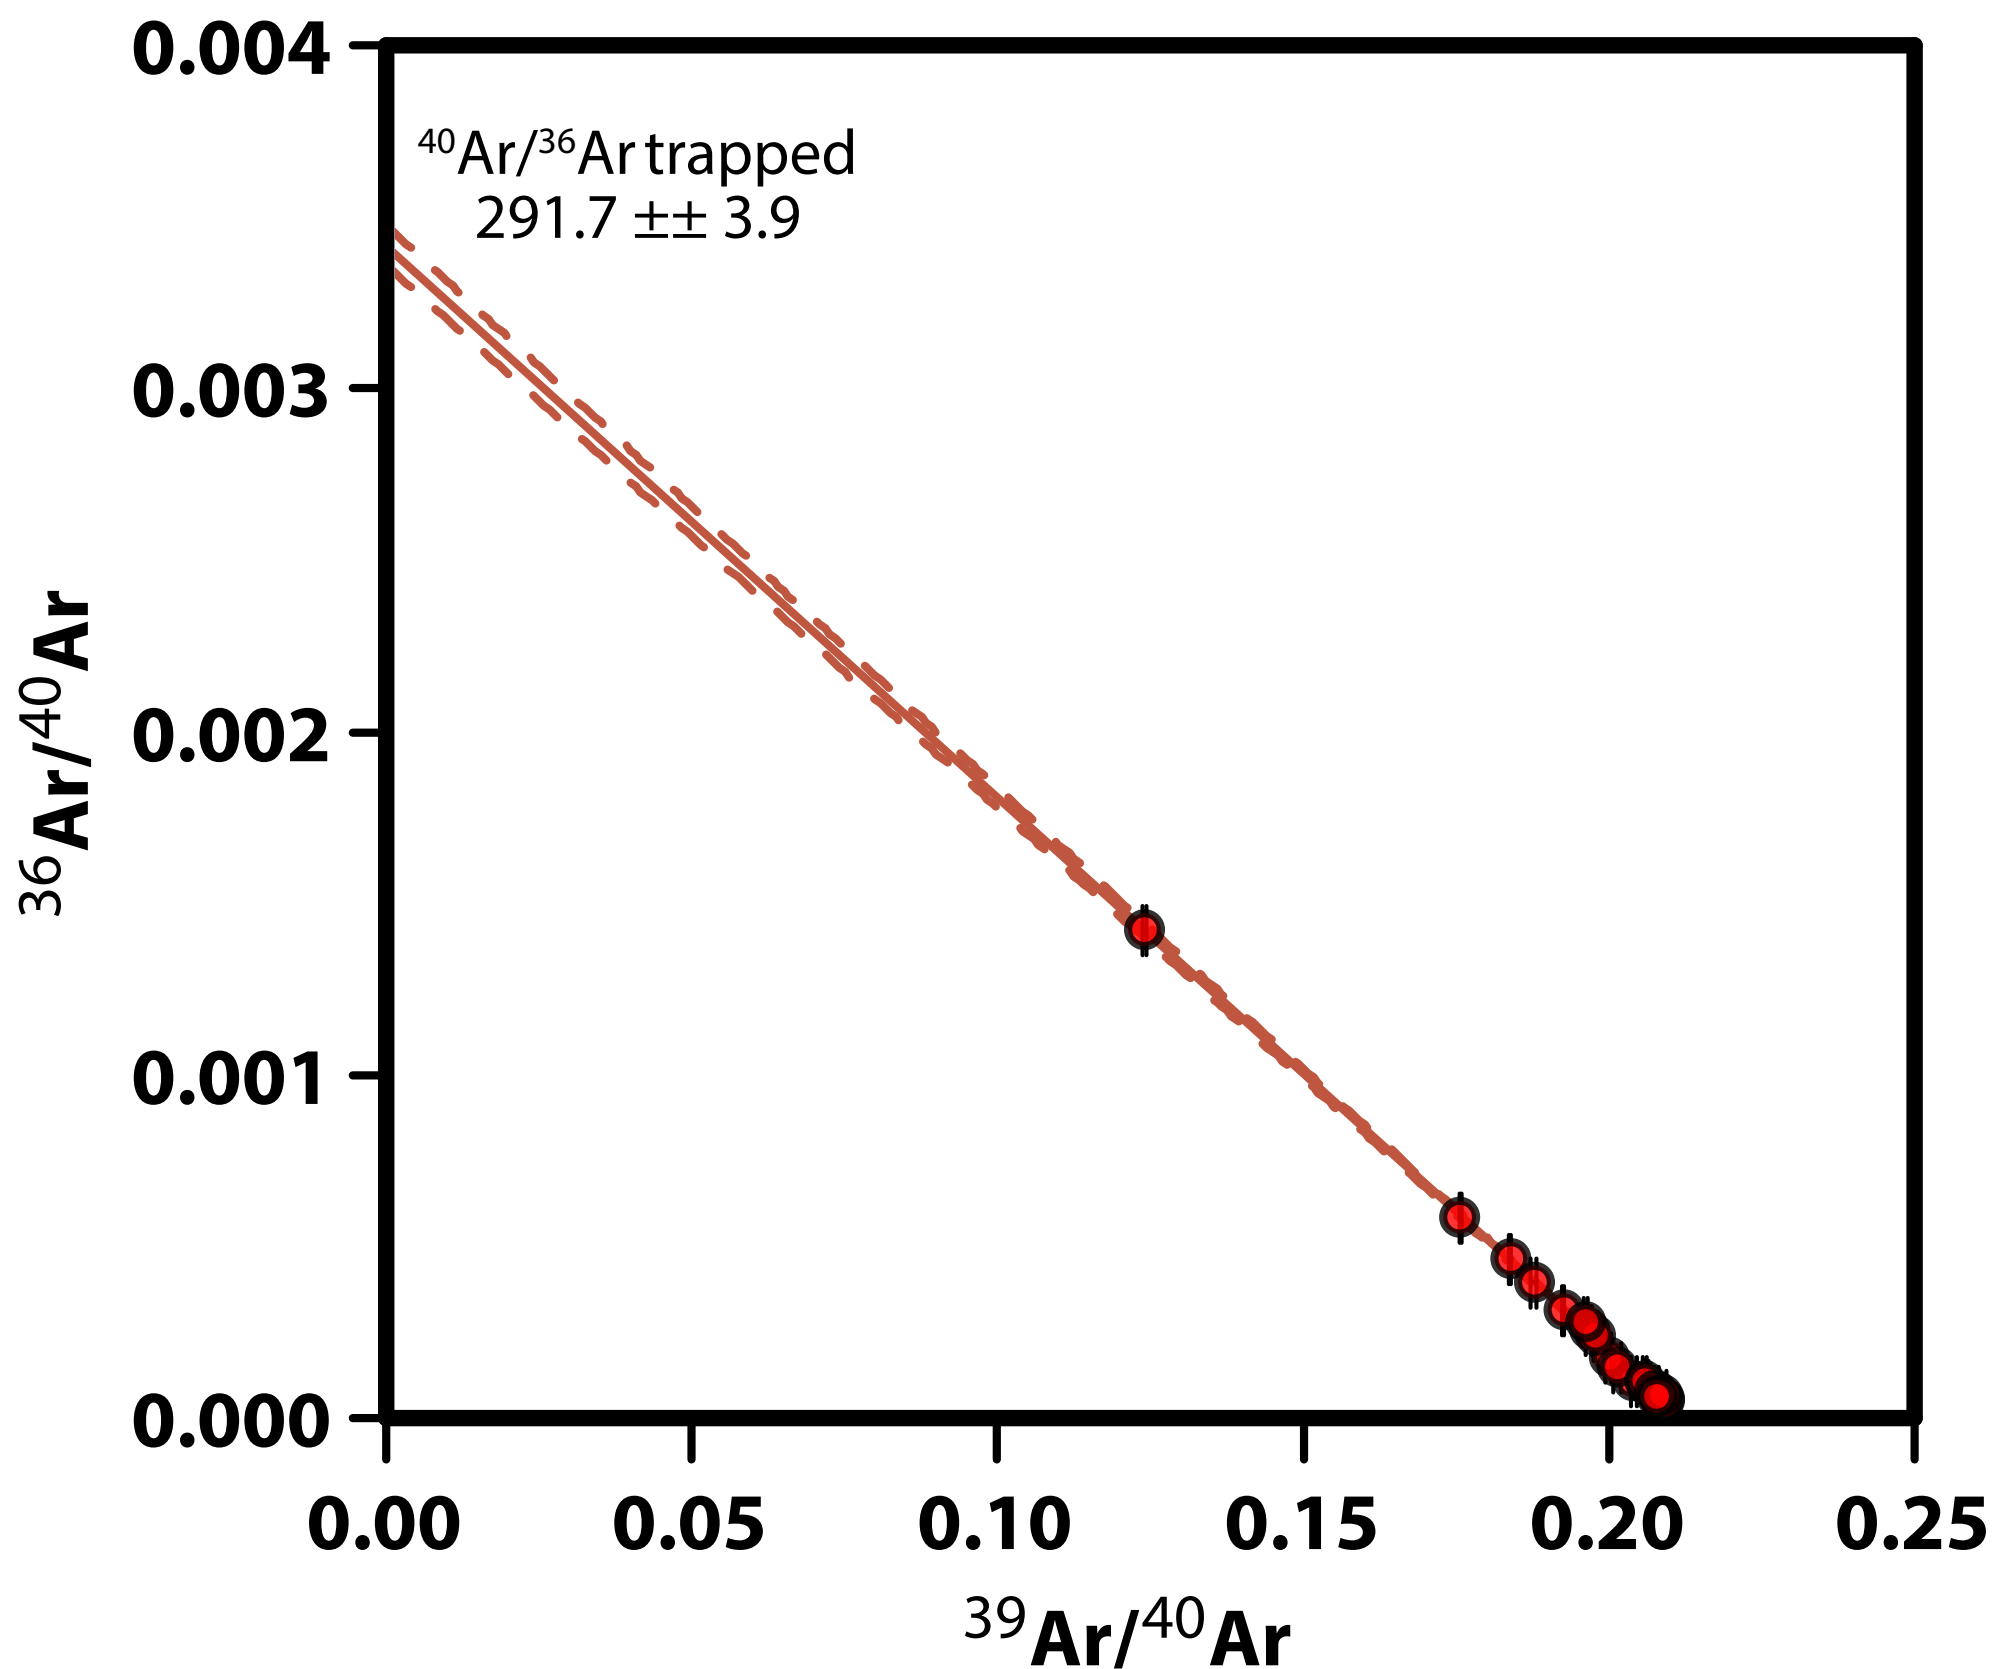

# Tuff of Long Ridge (TB-226)

$16.353 \pm \pm 0.031$  Ma

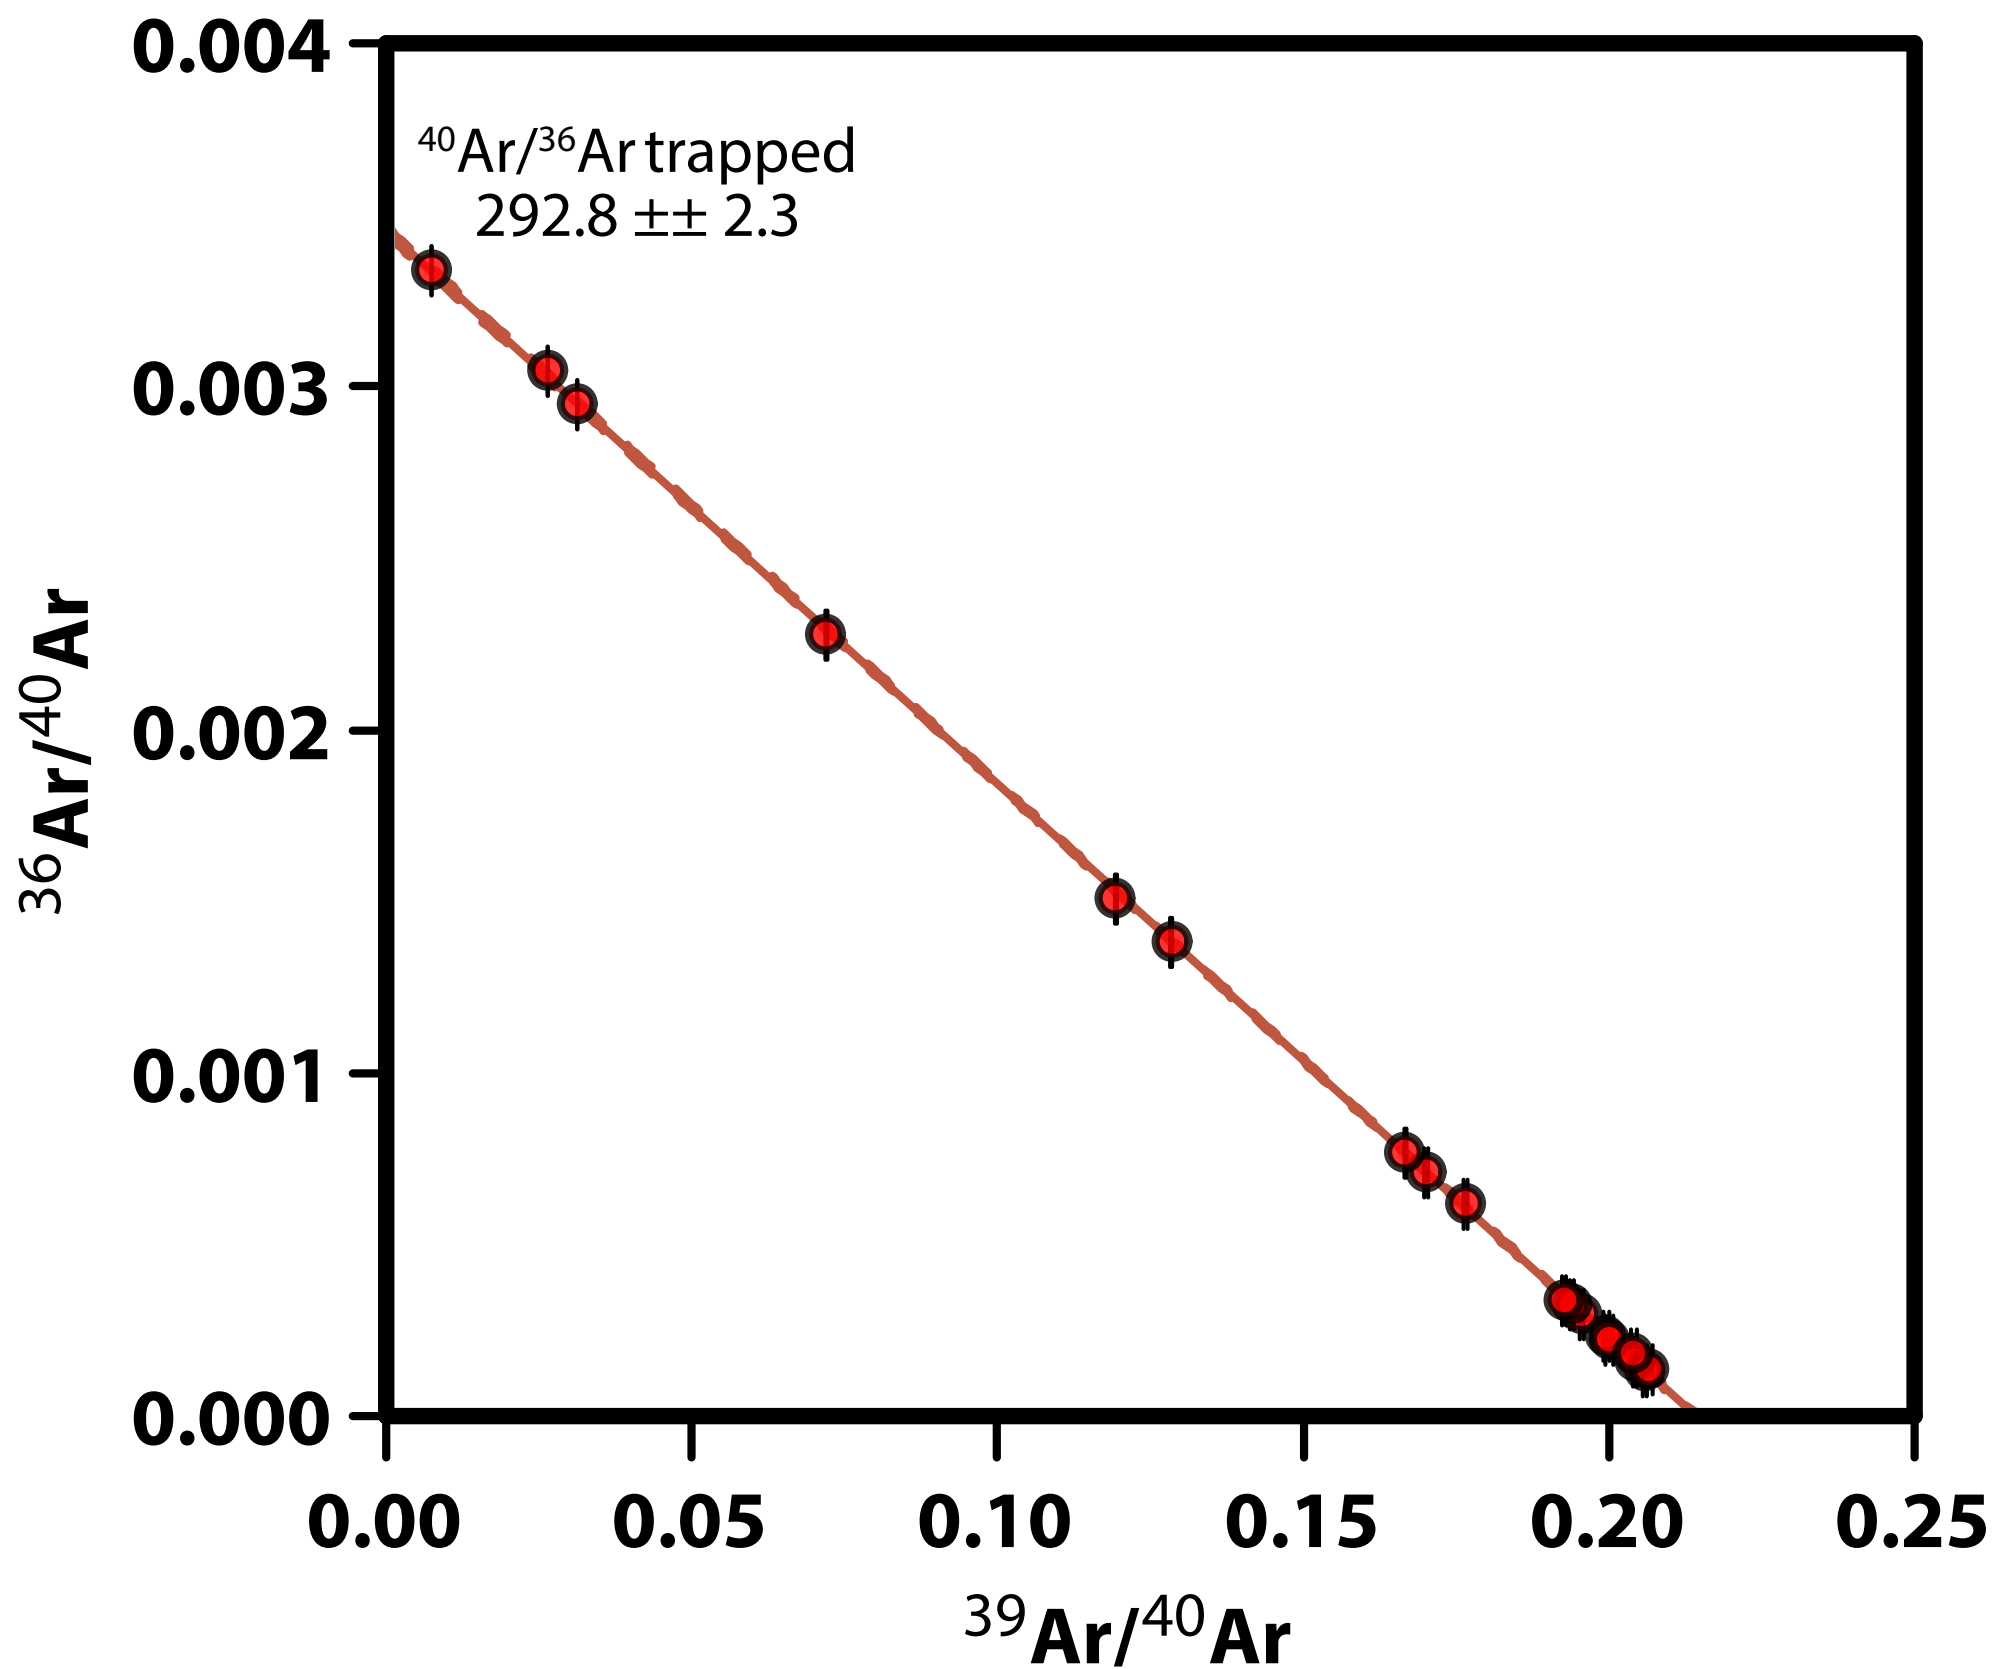



# Tuff of Oregon Canyon (TB-264)

$16.497 \pm \pm 0.036$  Ma

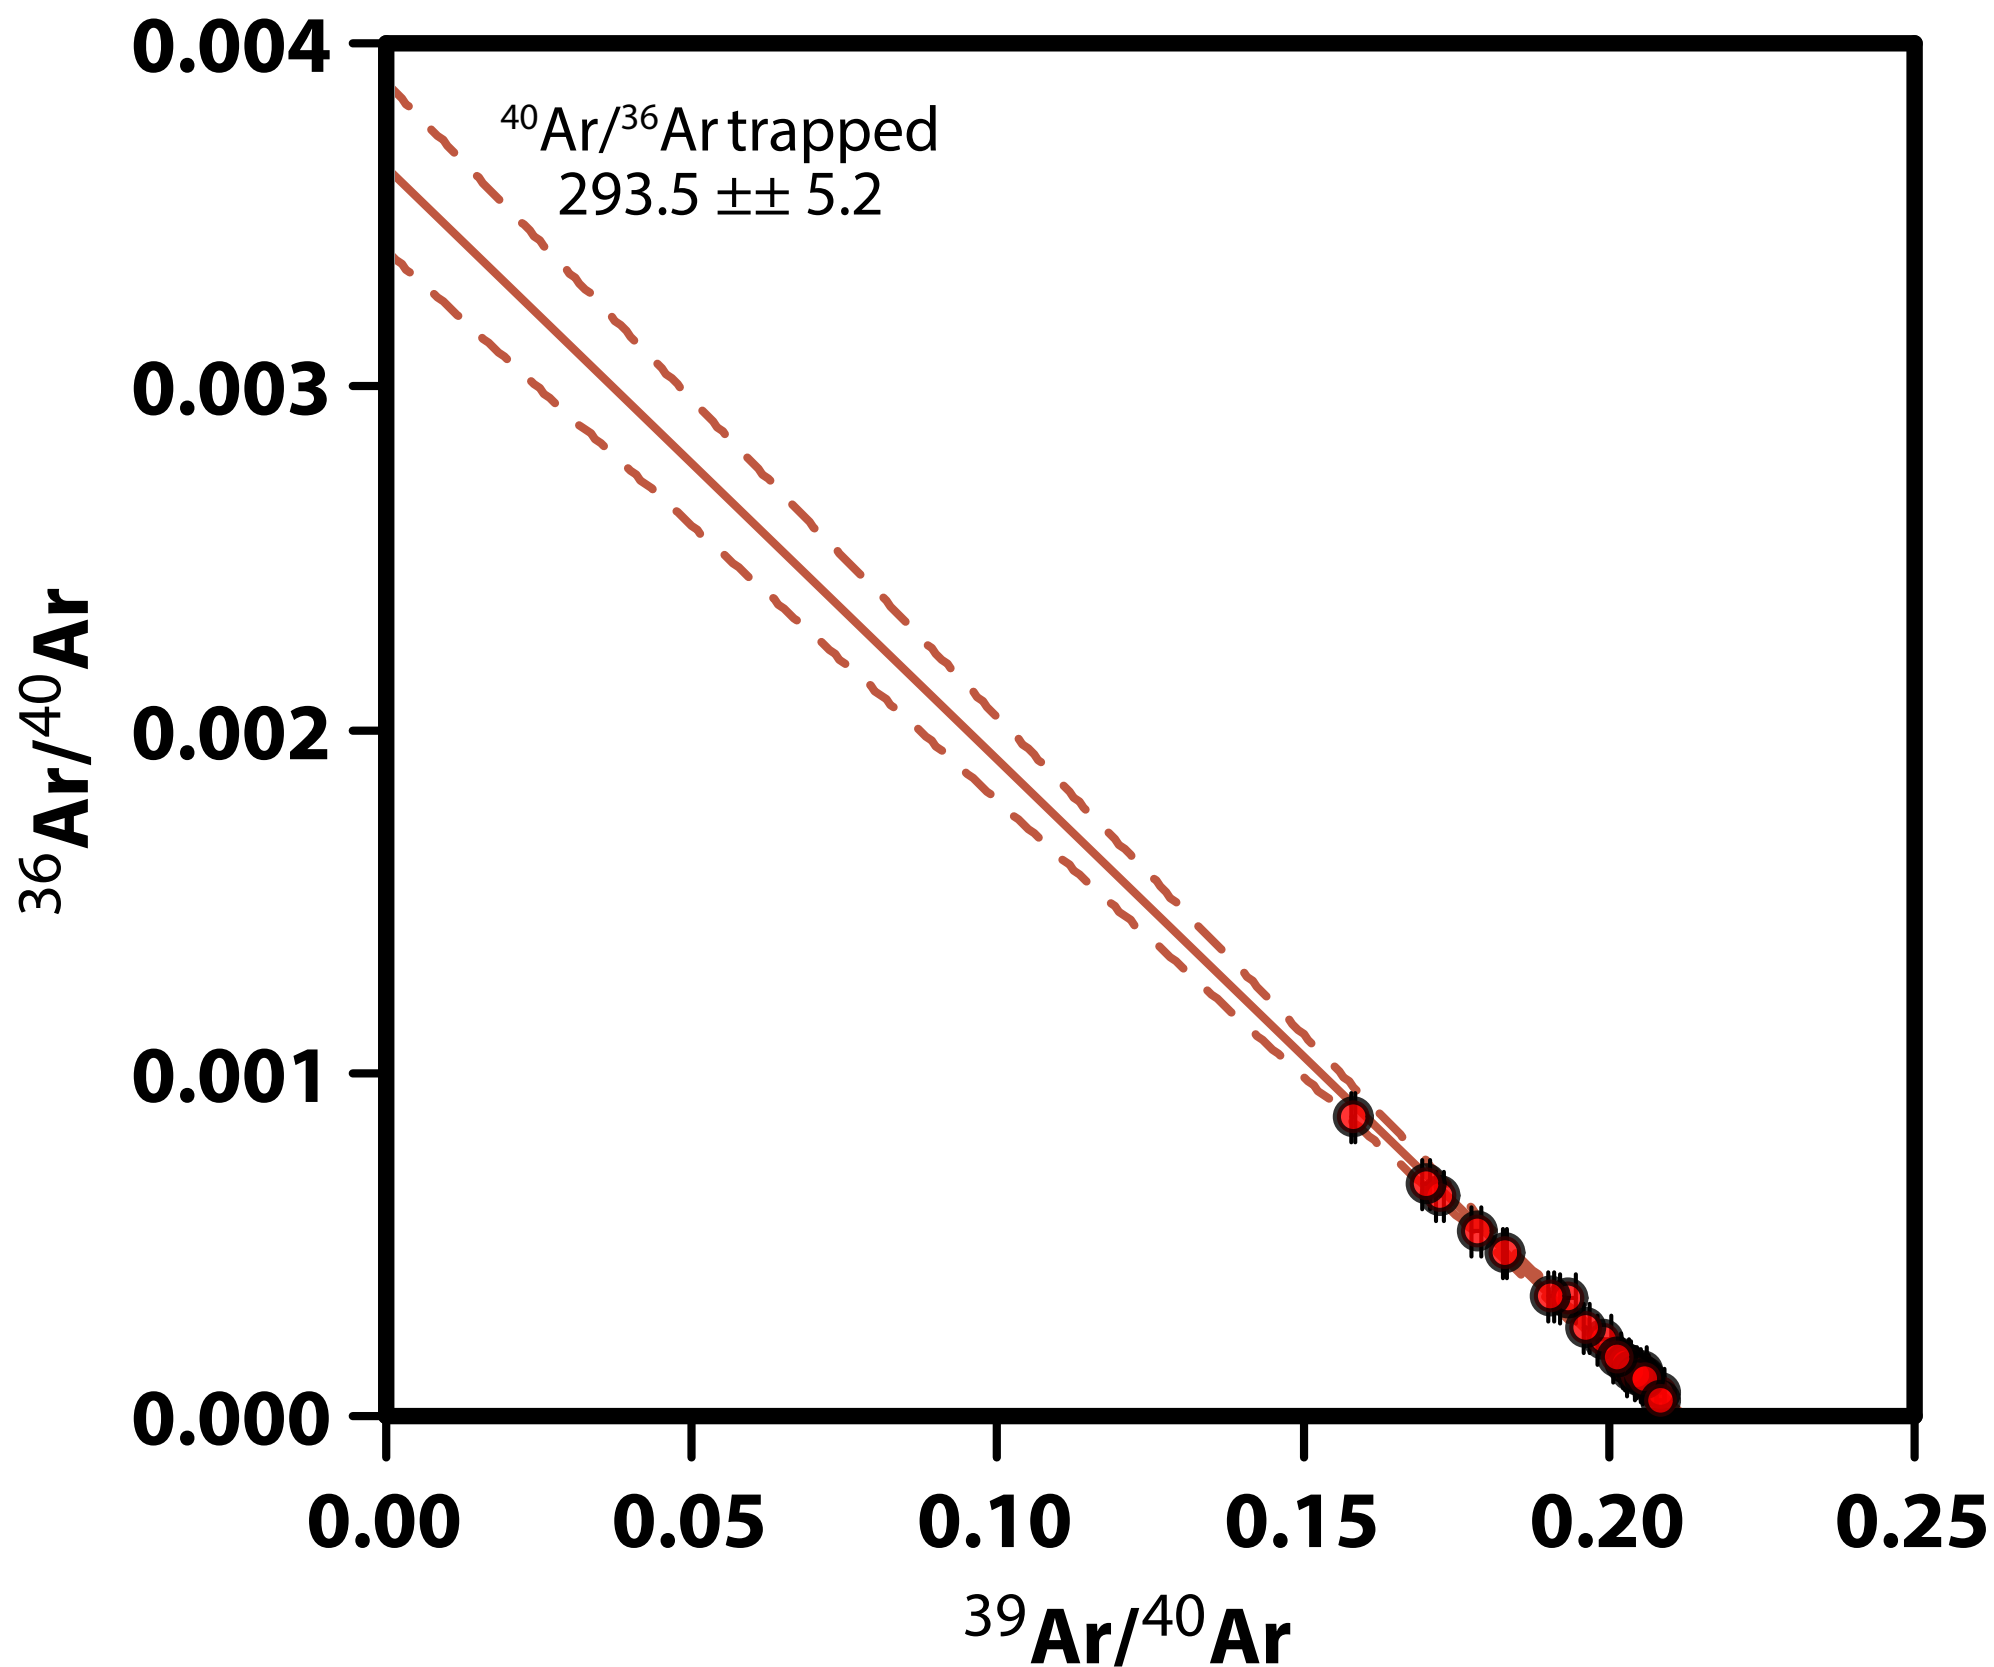

Tuff of Trout Creek Mtns (TB-265B)  
16.412  $\pm$  0.017 Ma

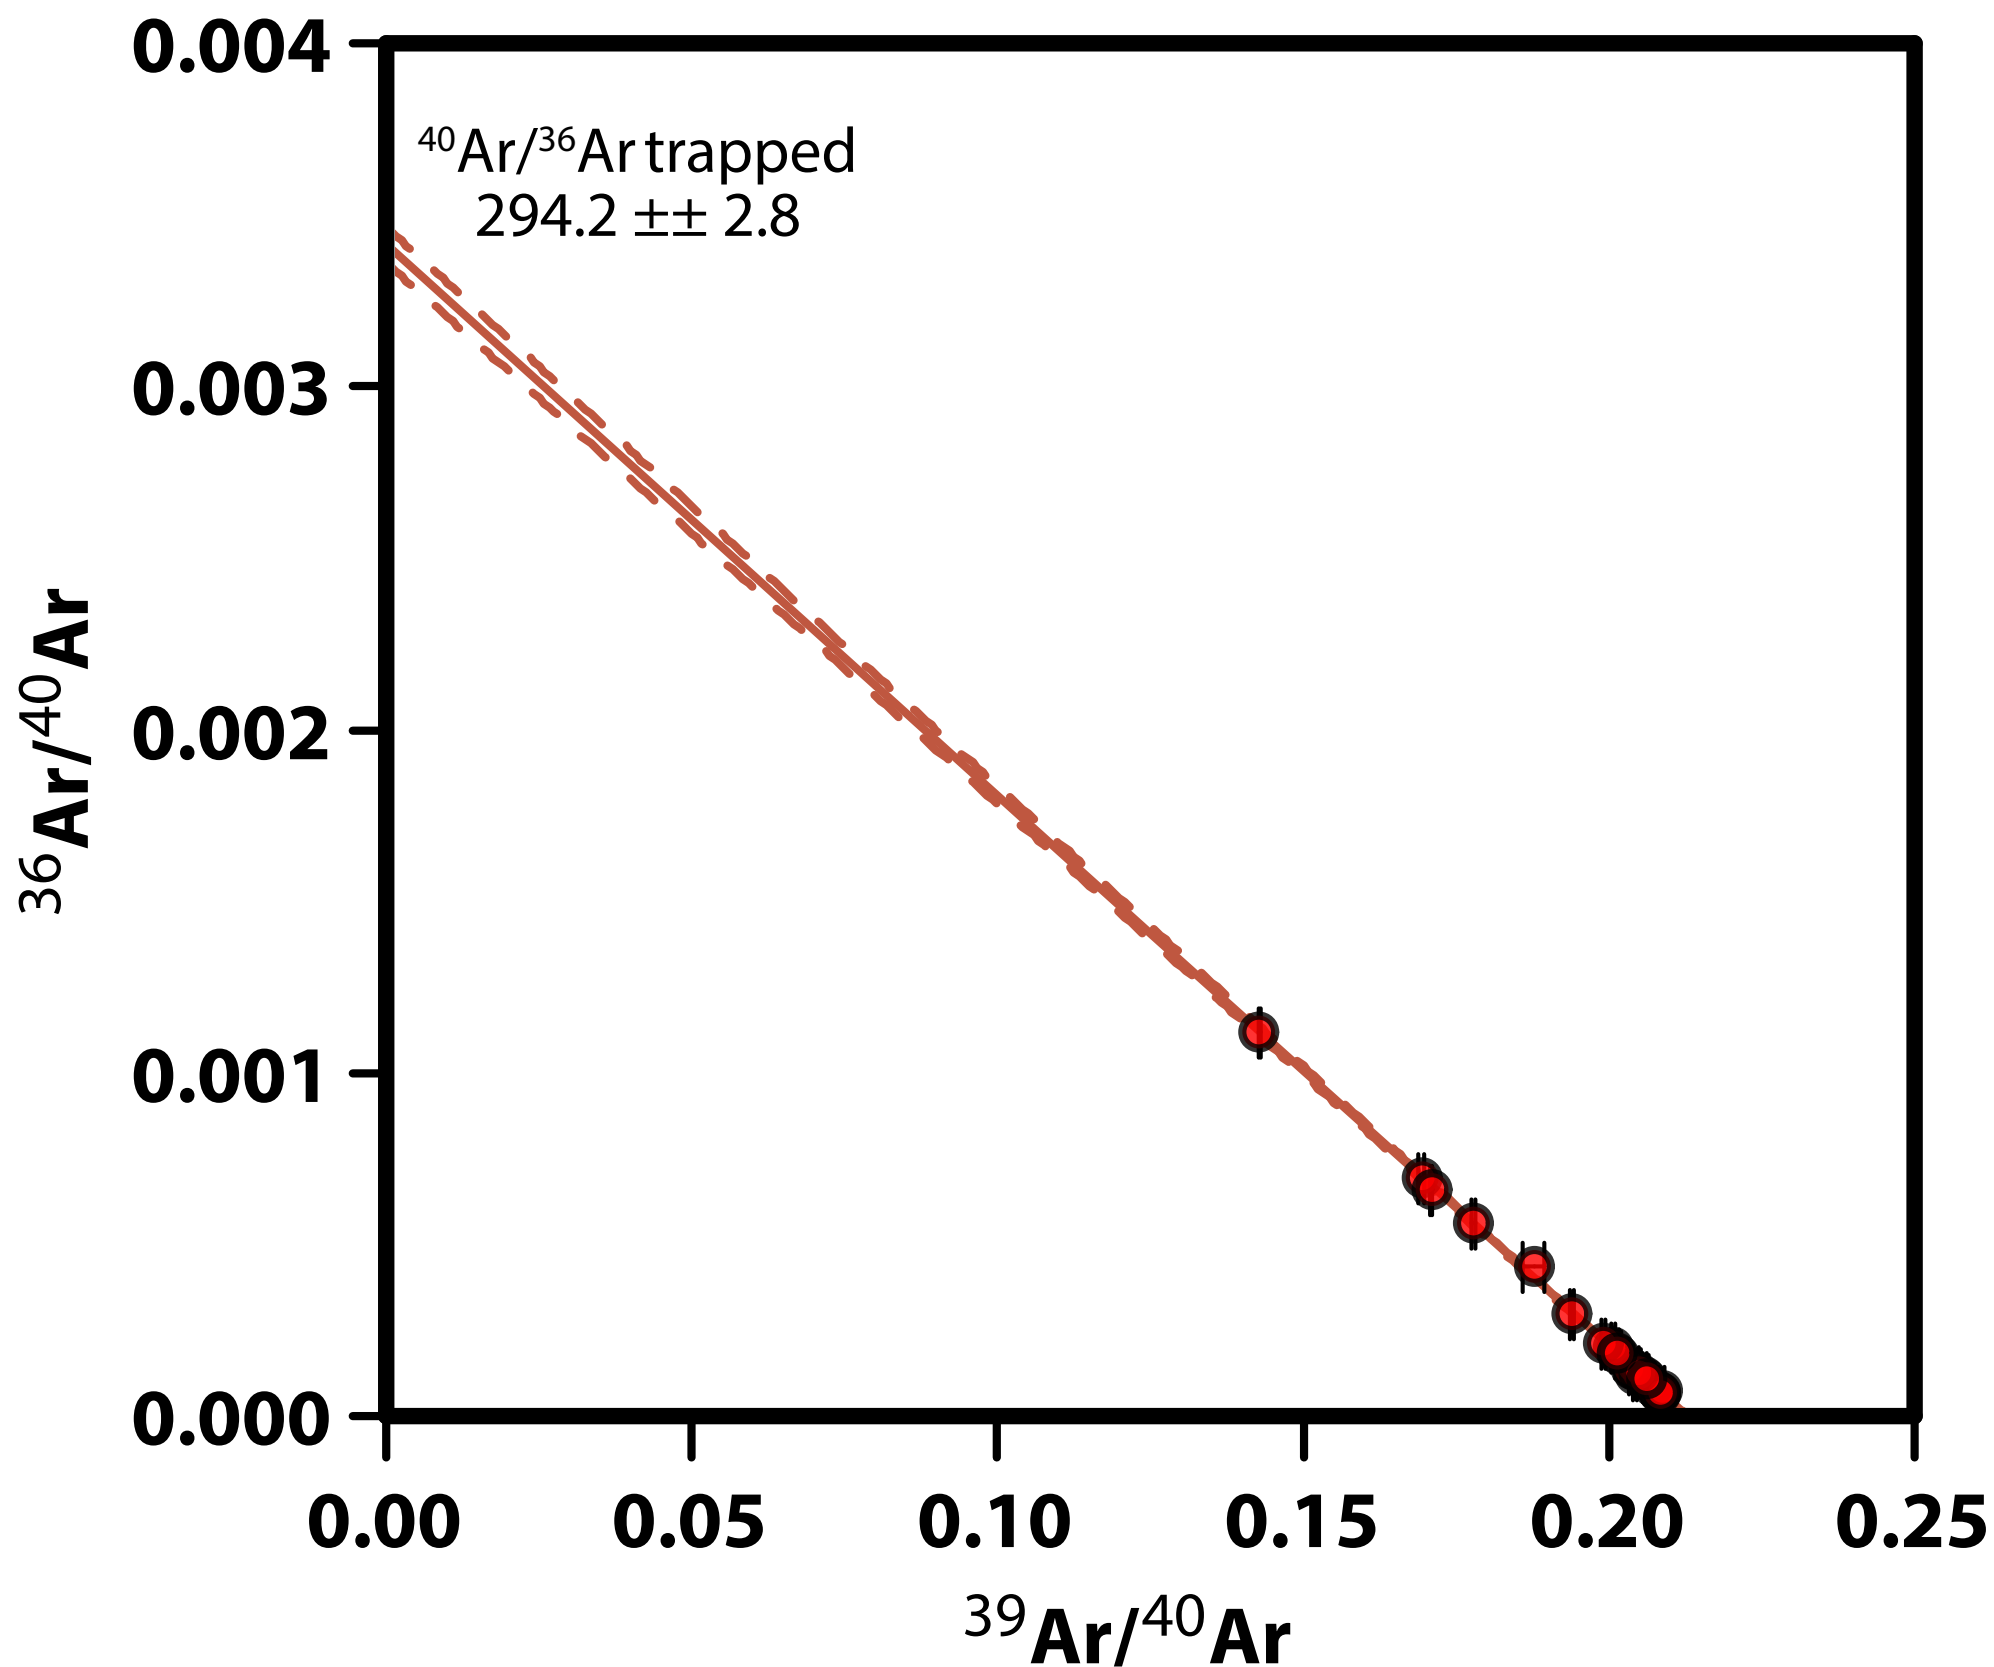

# N. Red Mountain rhyolite lava (TB-266)

$16.526 \pm \pm 0.022$  Ma

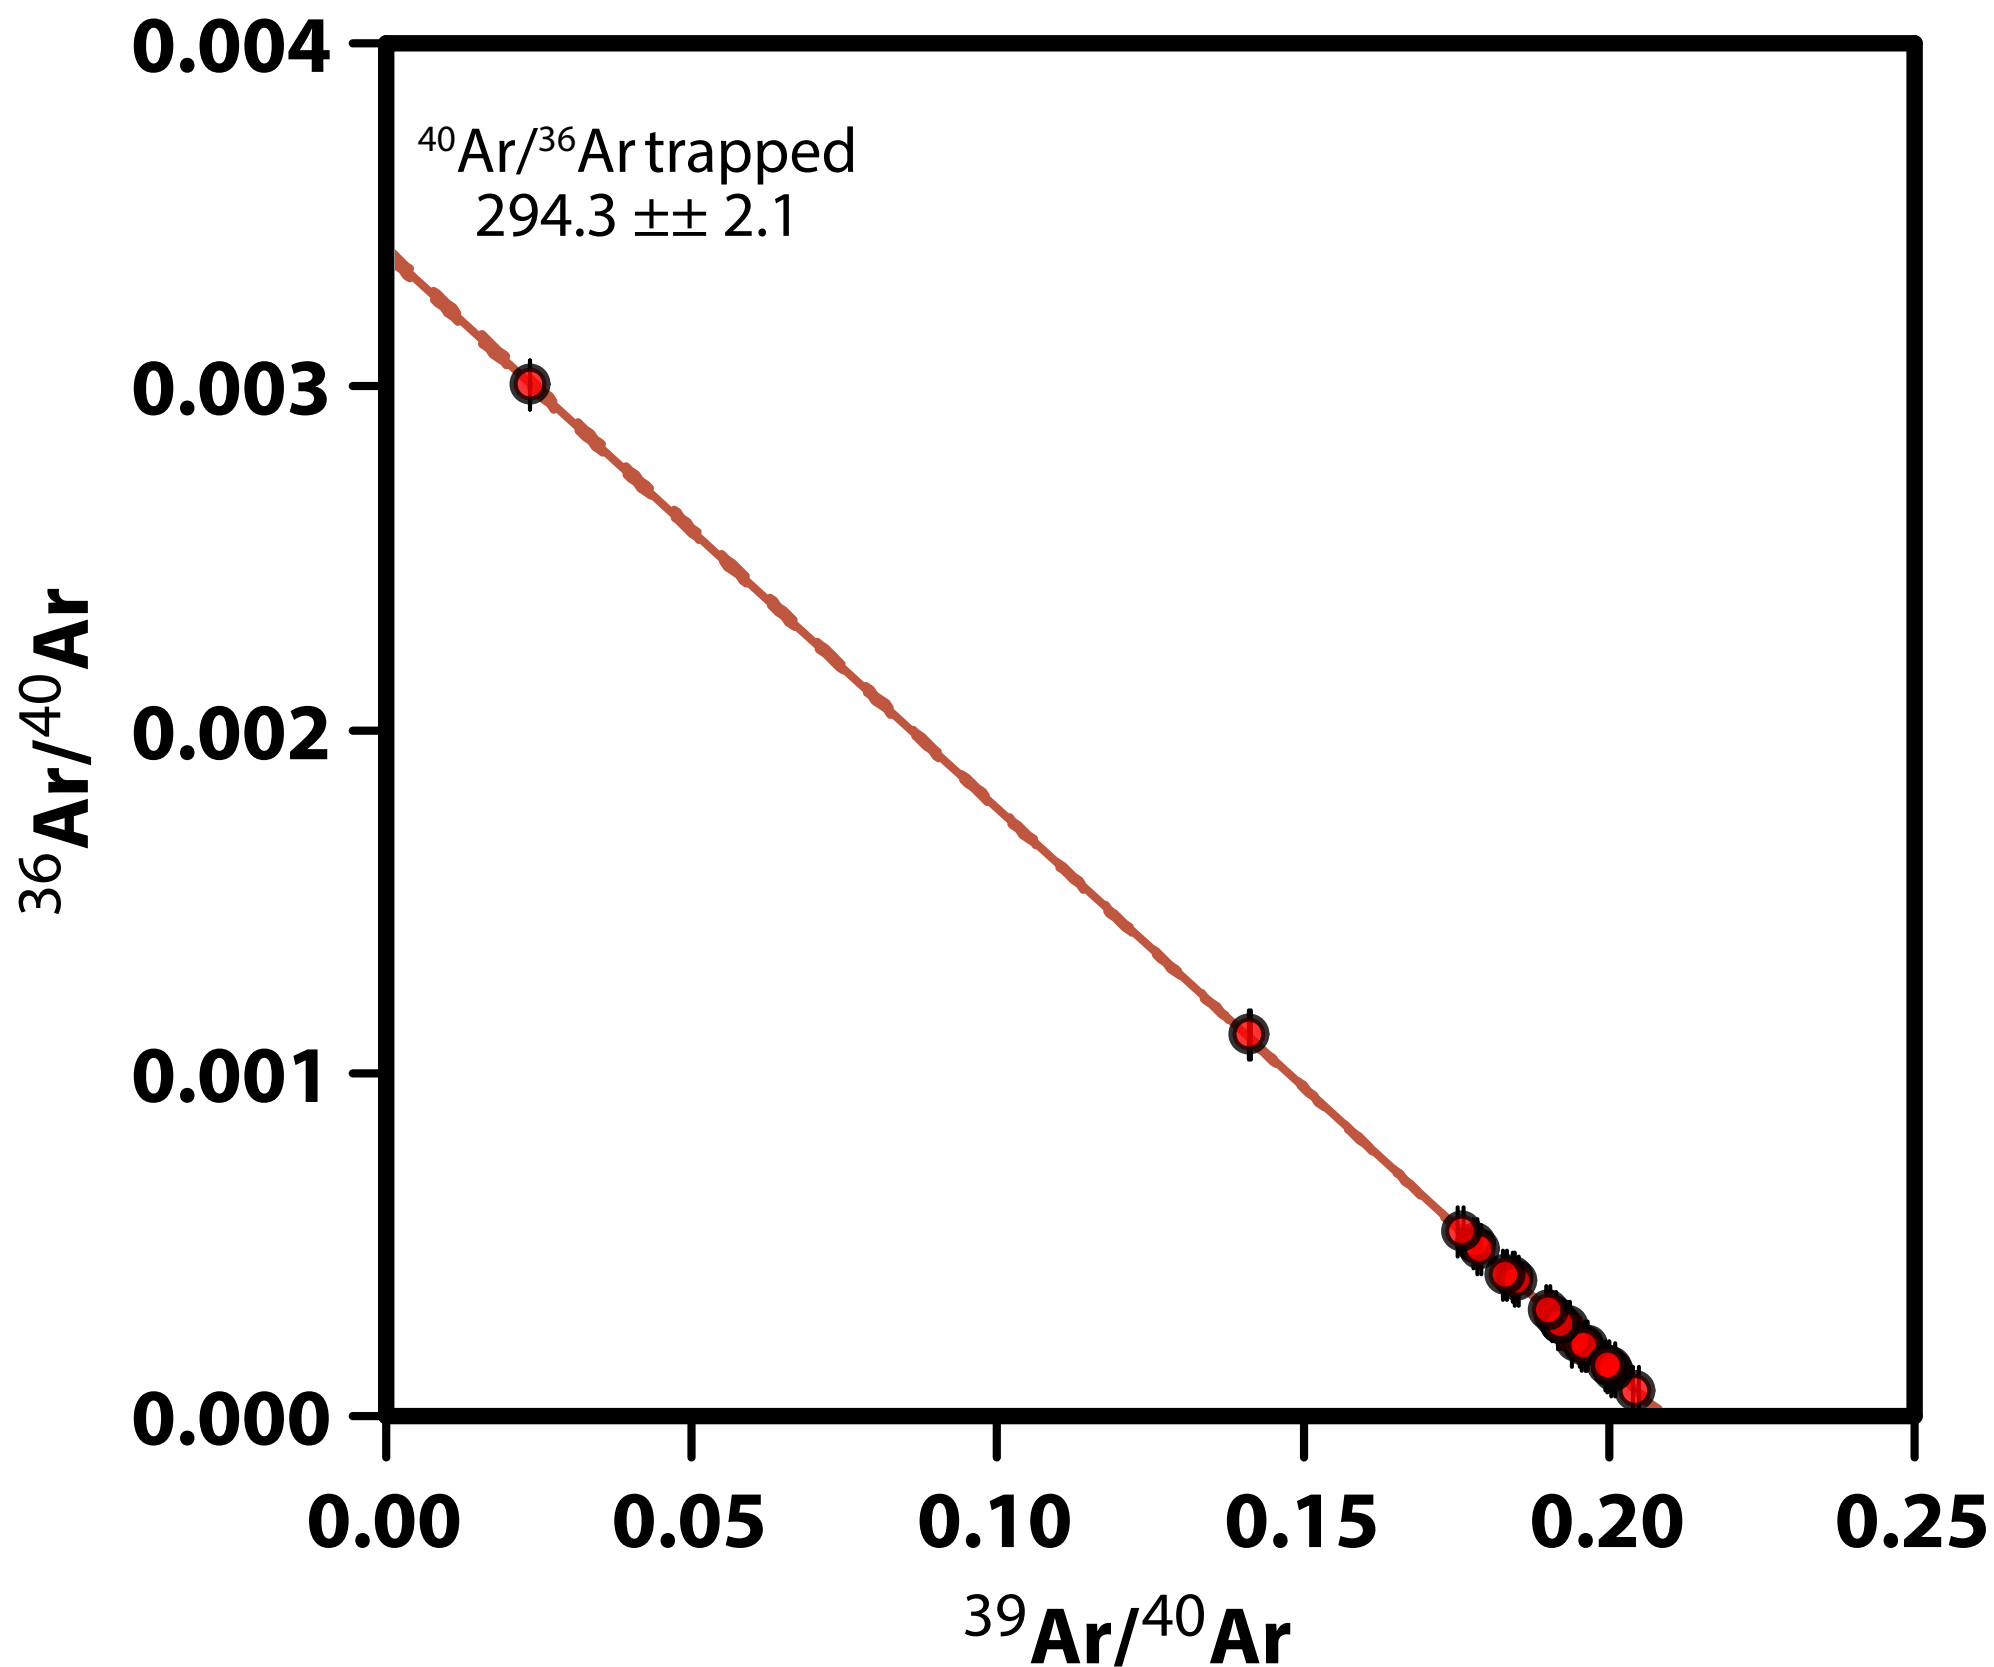

# Camp turnoff rhyolite lava (TB-307)

$15.592 \pm \pm 0.028$  Ma

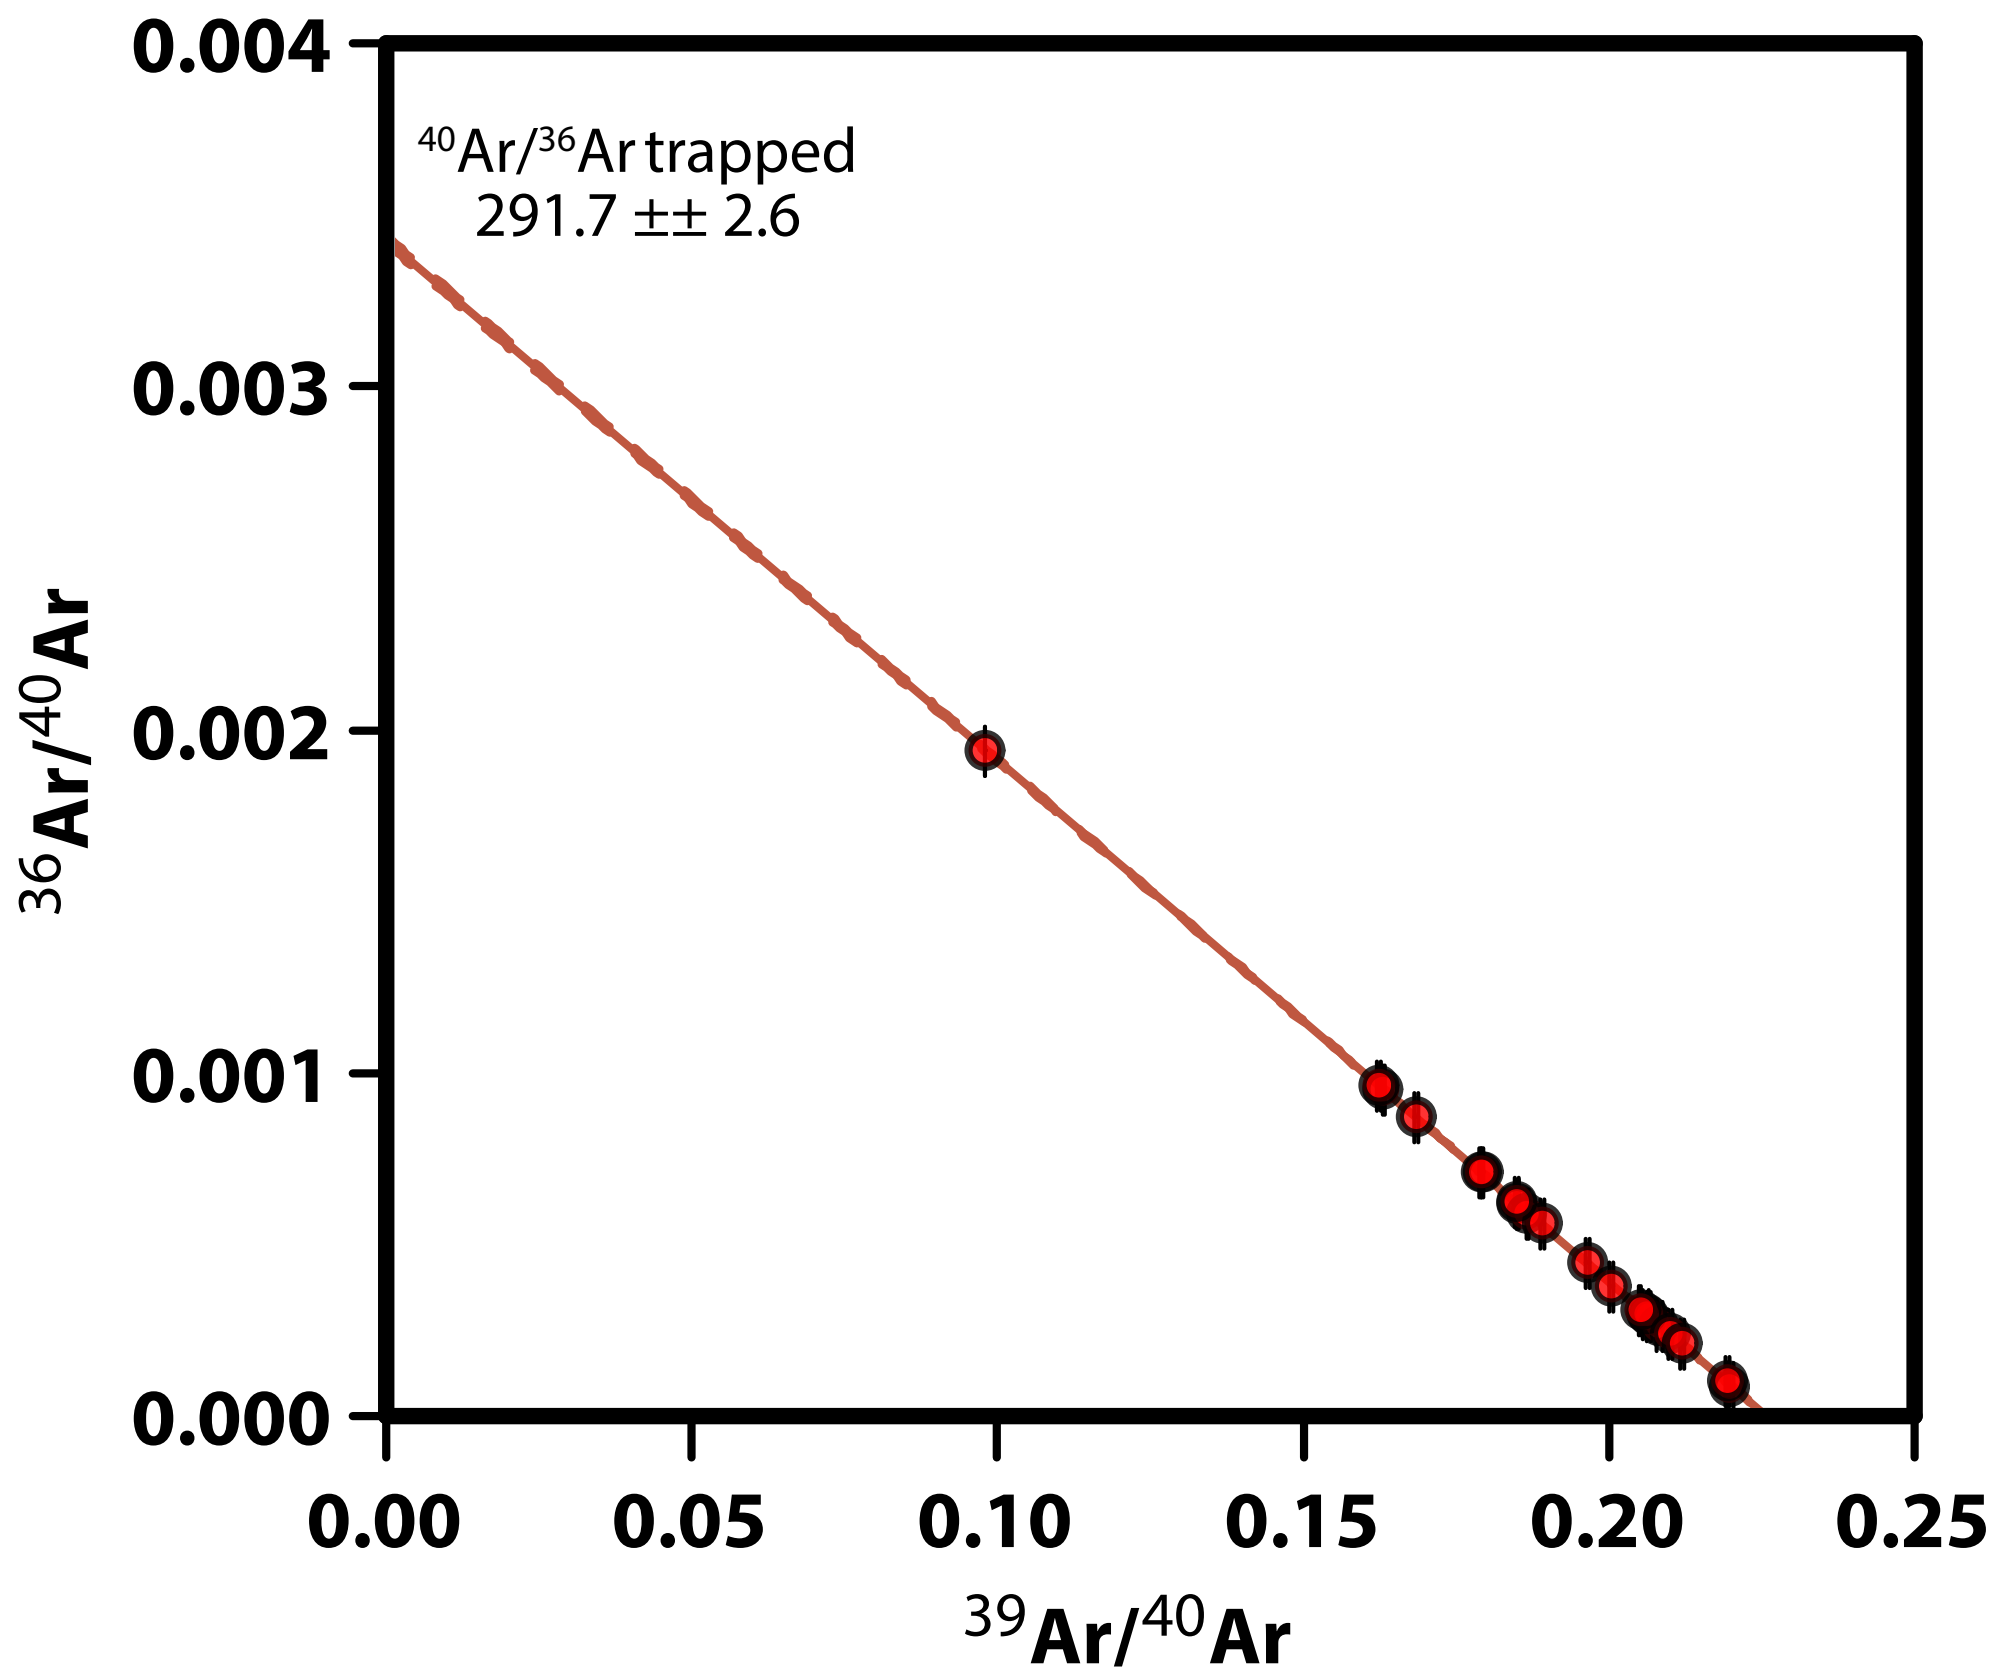

# Buckskin Mtn hornblende rhyolite lava (TB-317)

15.369  $\pm$  0.015 Ma

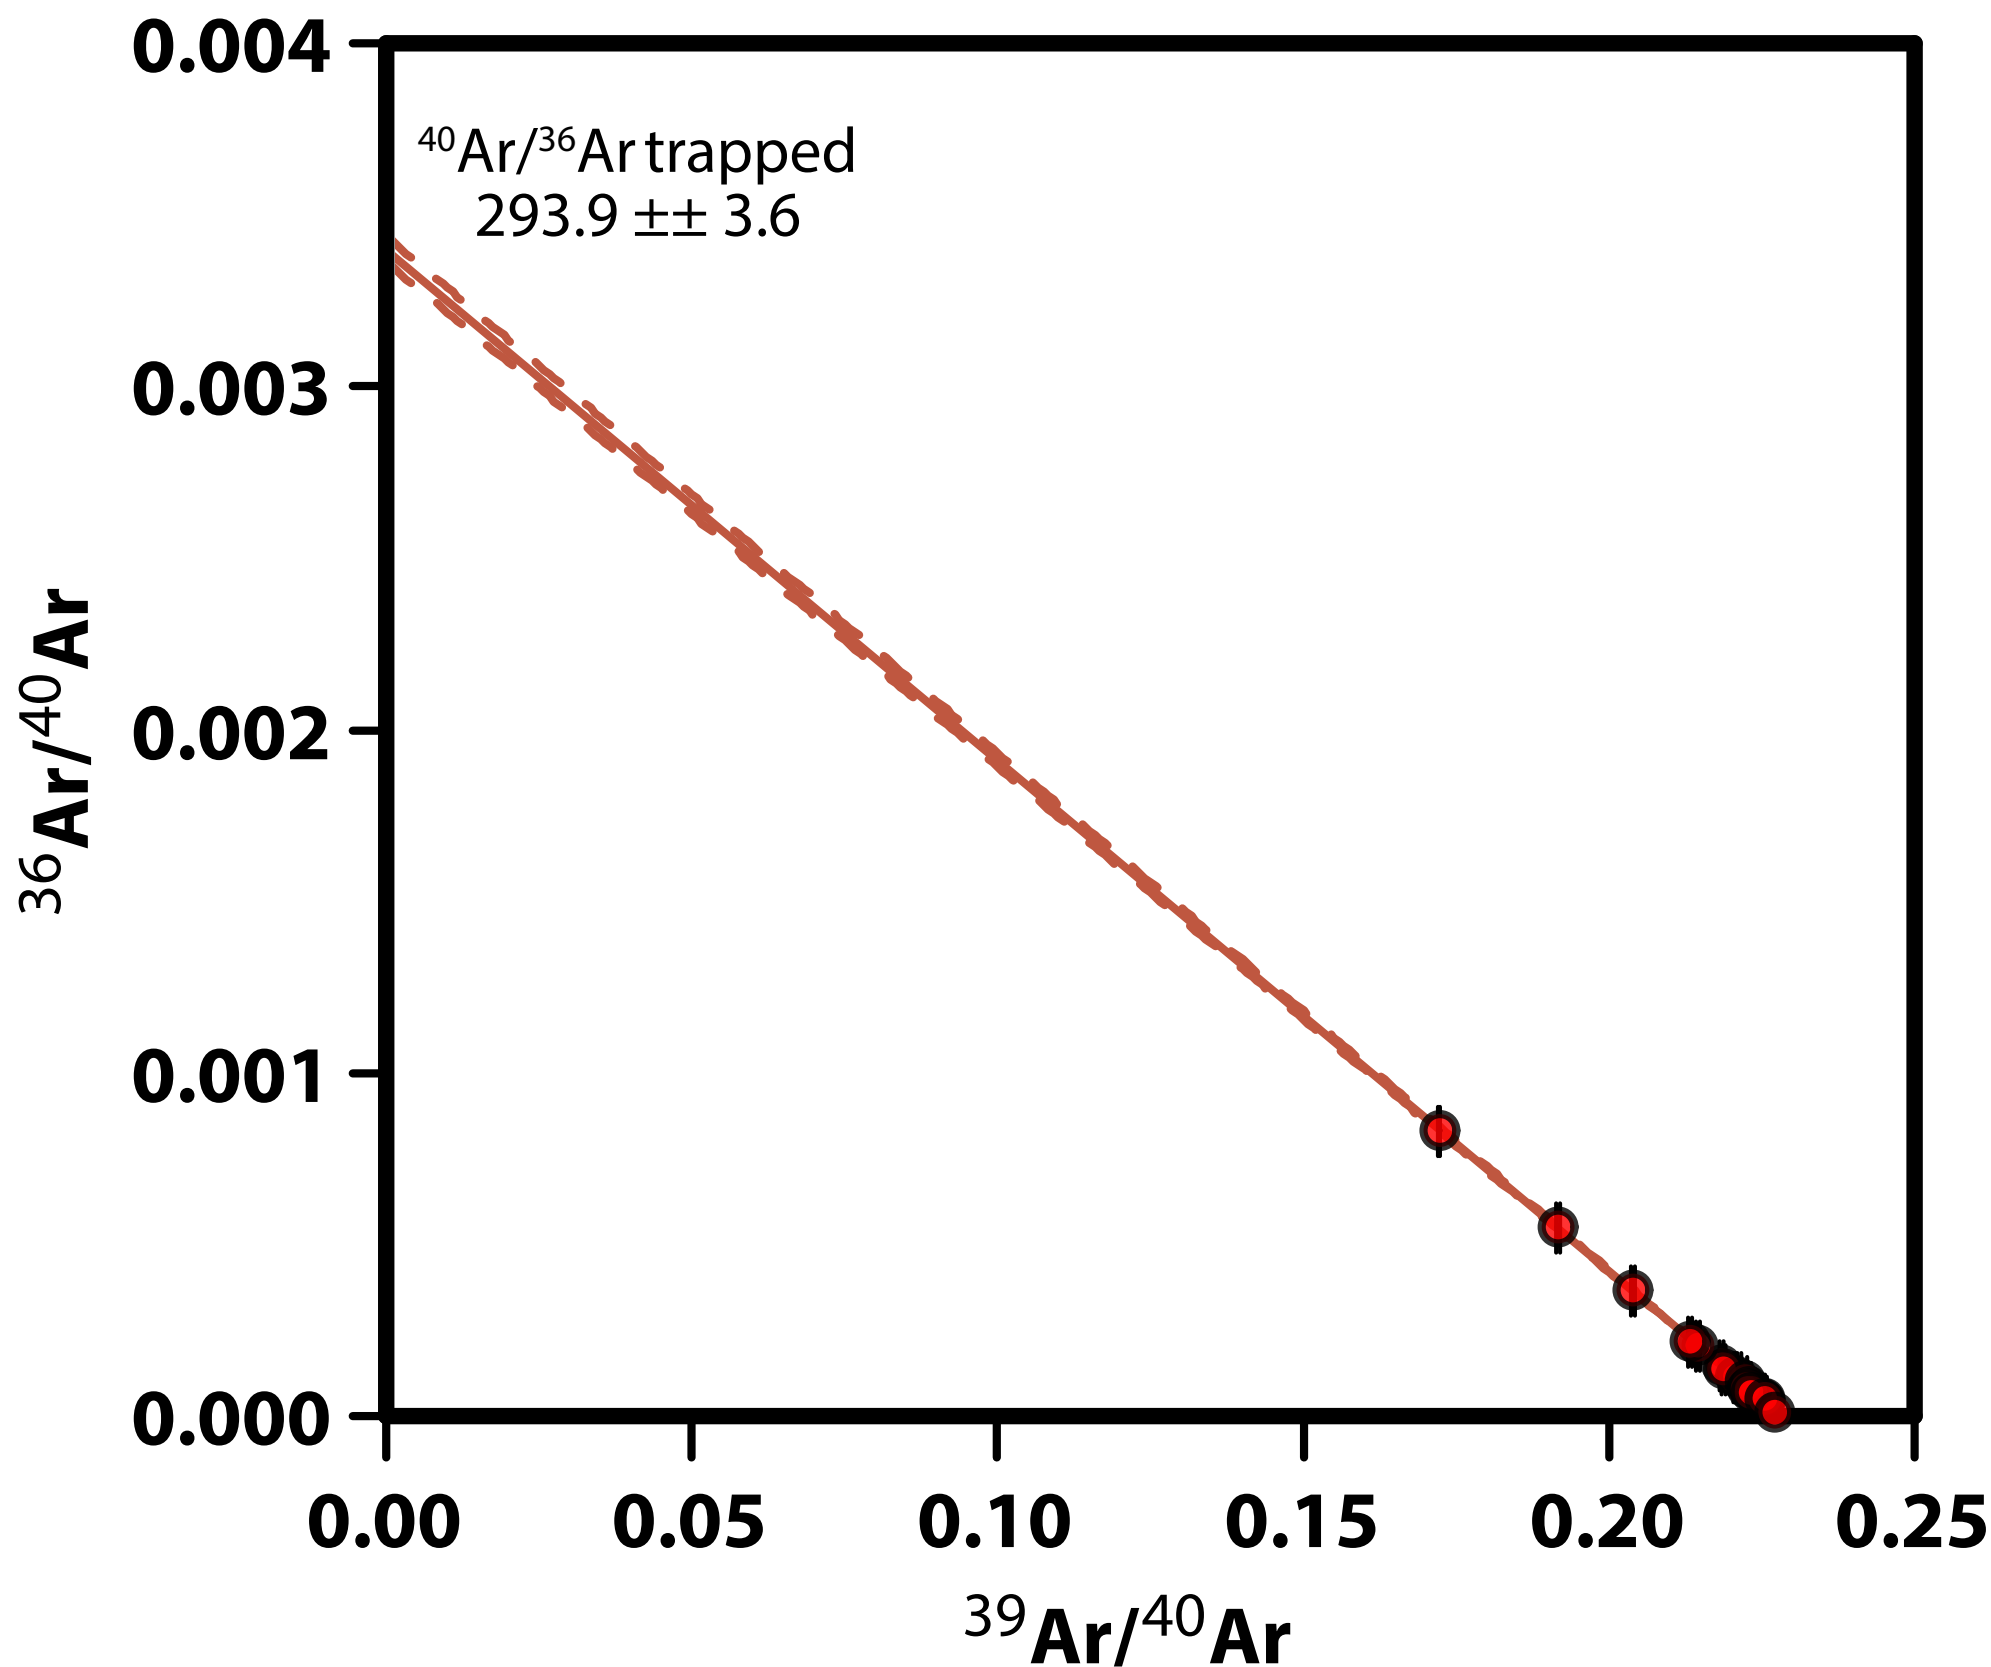

# Flagstaff Butte rhyolite lava (TB-318)

$15.510 \pm \pm 0.023$  Ma

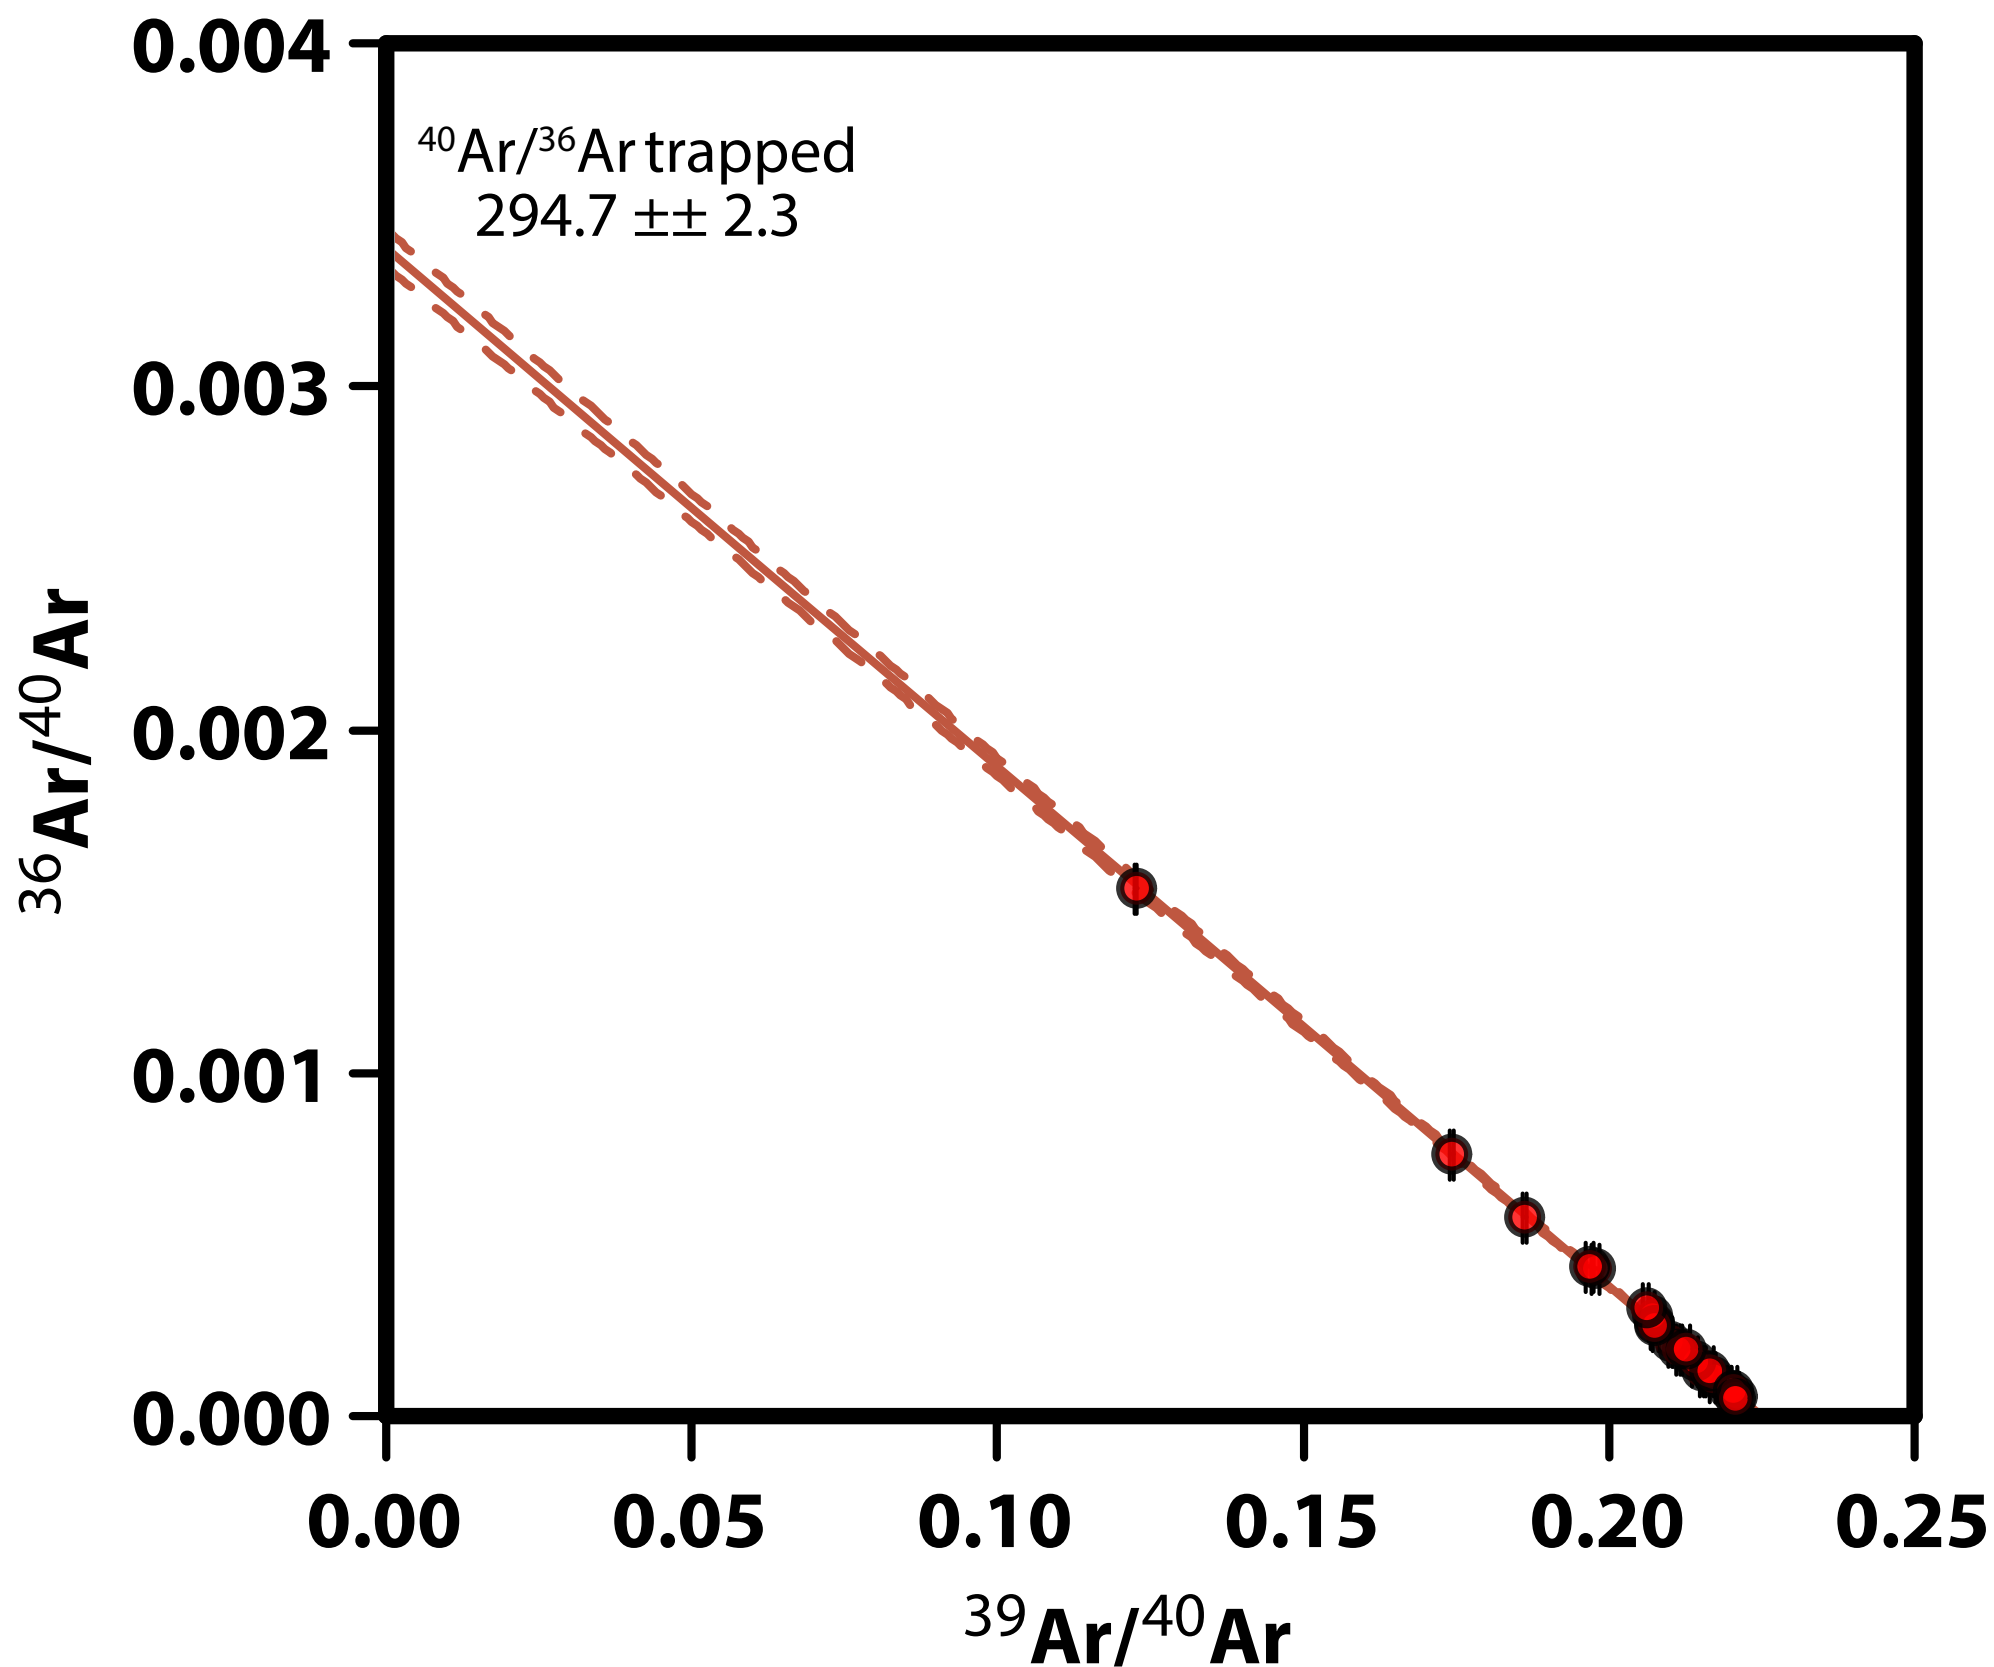

# N. Whitehorse Butte rhyolite lava (TB-320)

$15.575 \pm \pm 0.023$  Ma

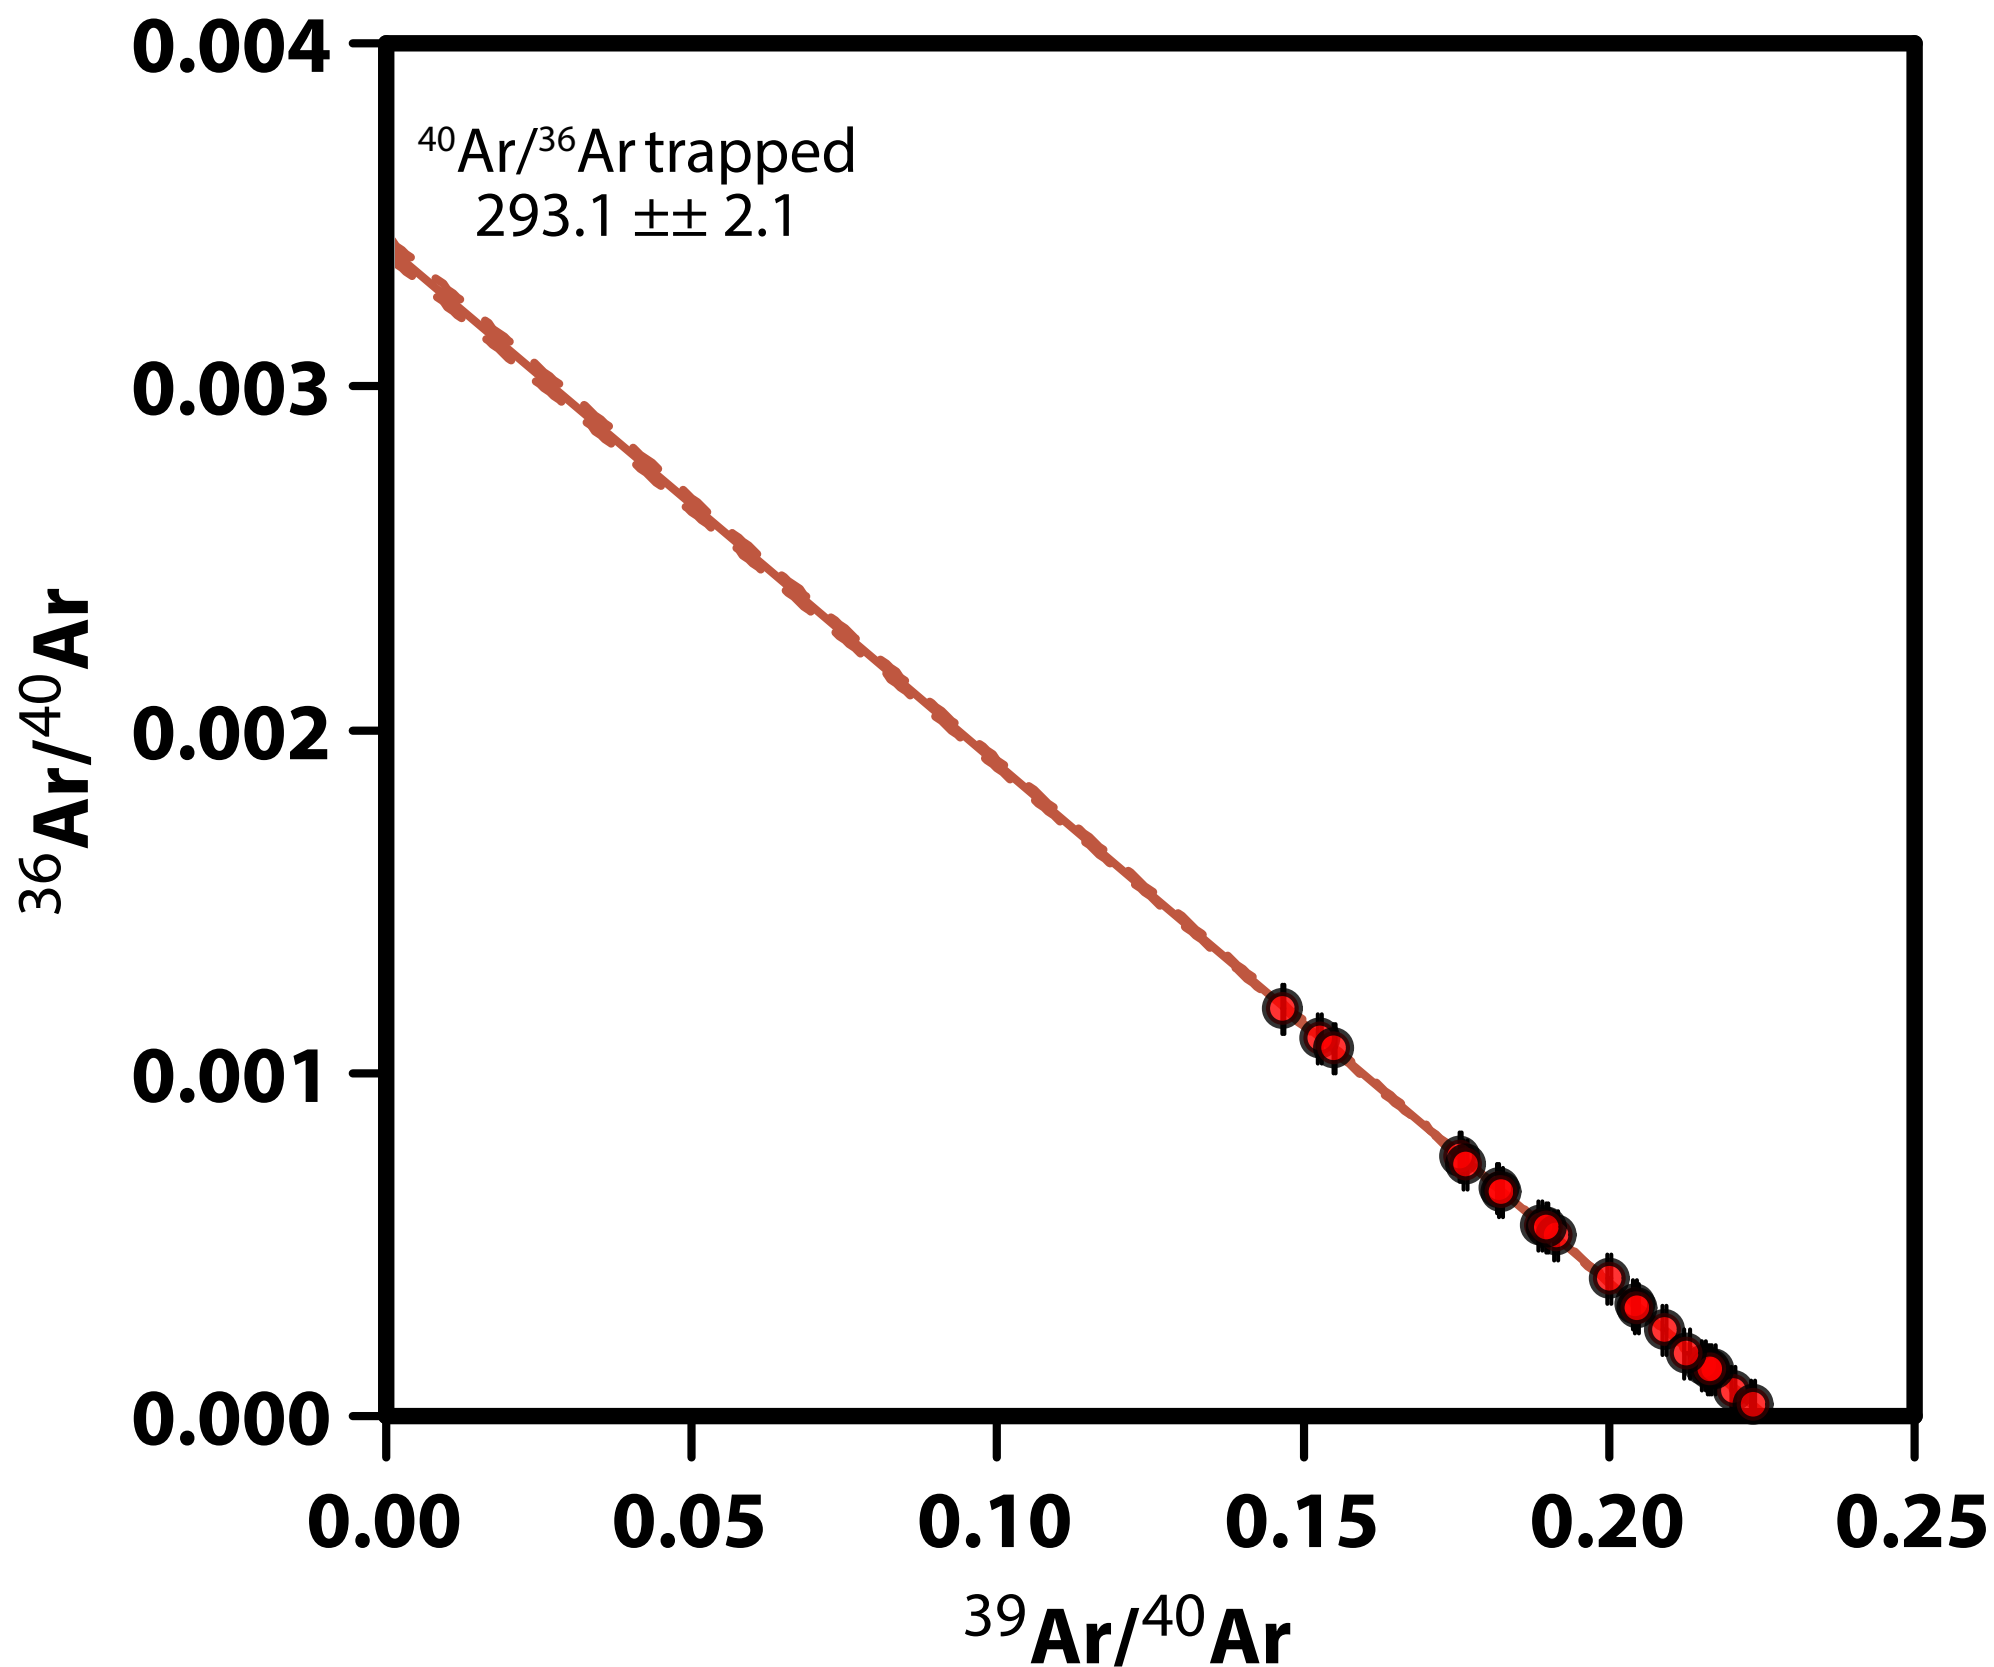

S. camp rhyolite lava (TB-321)

$15.435 \pm \pm 0.043$  Ma

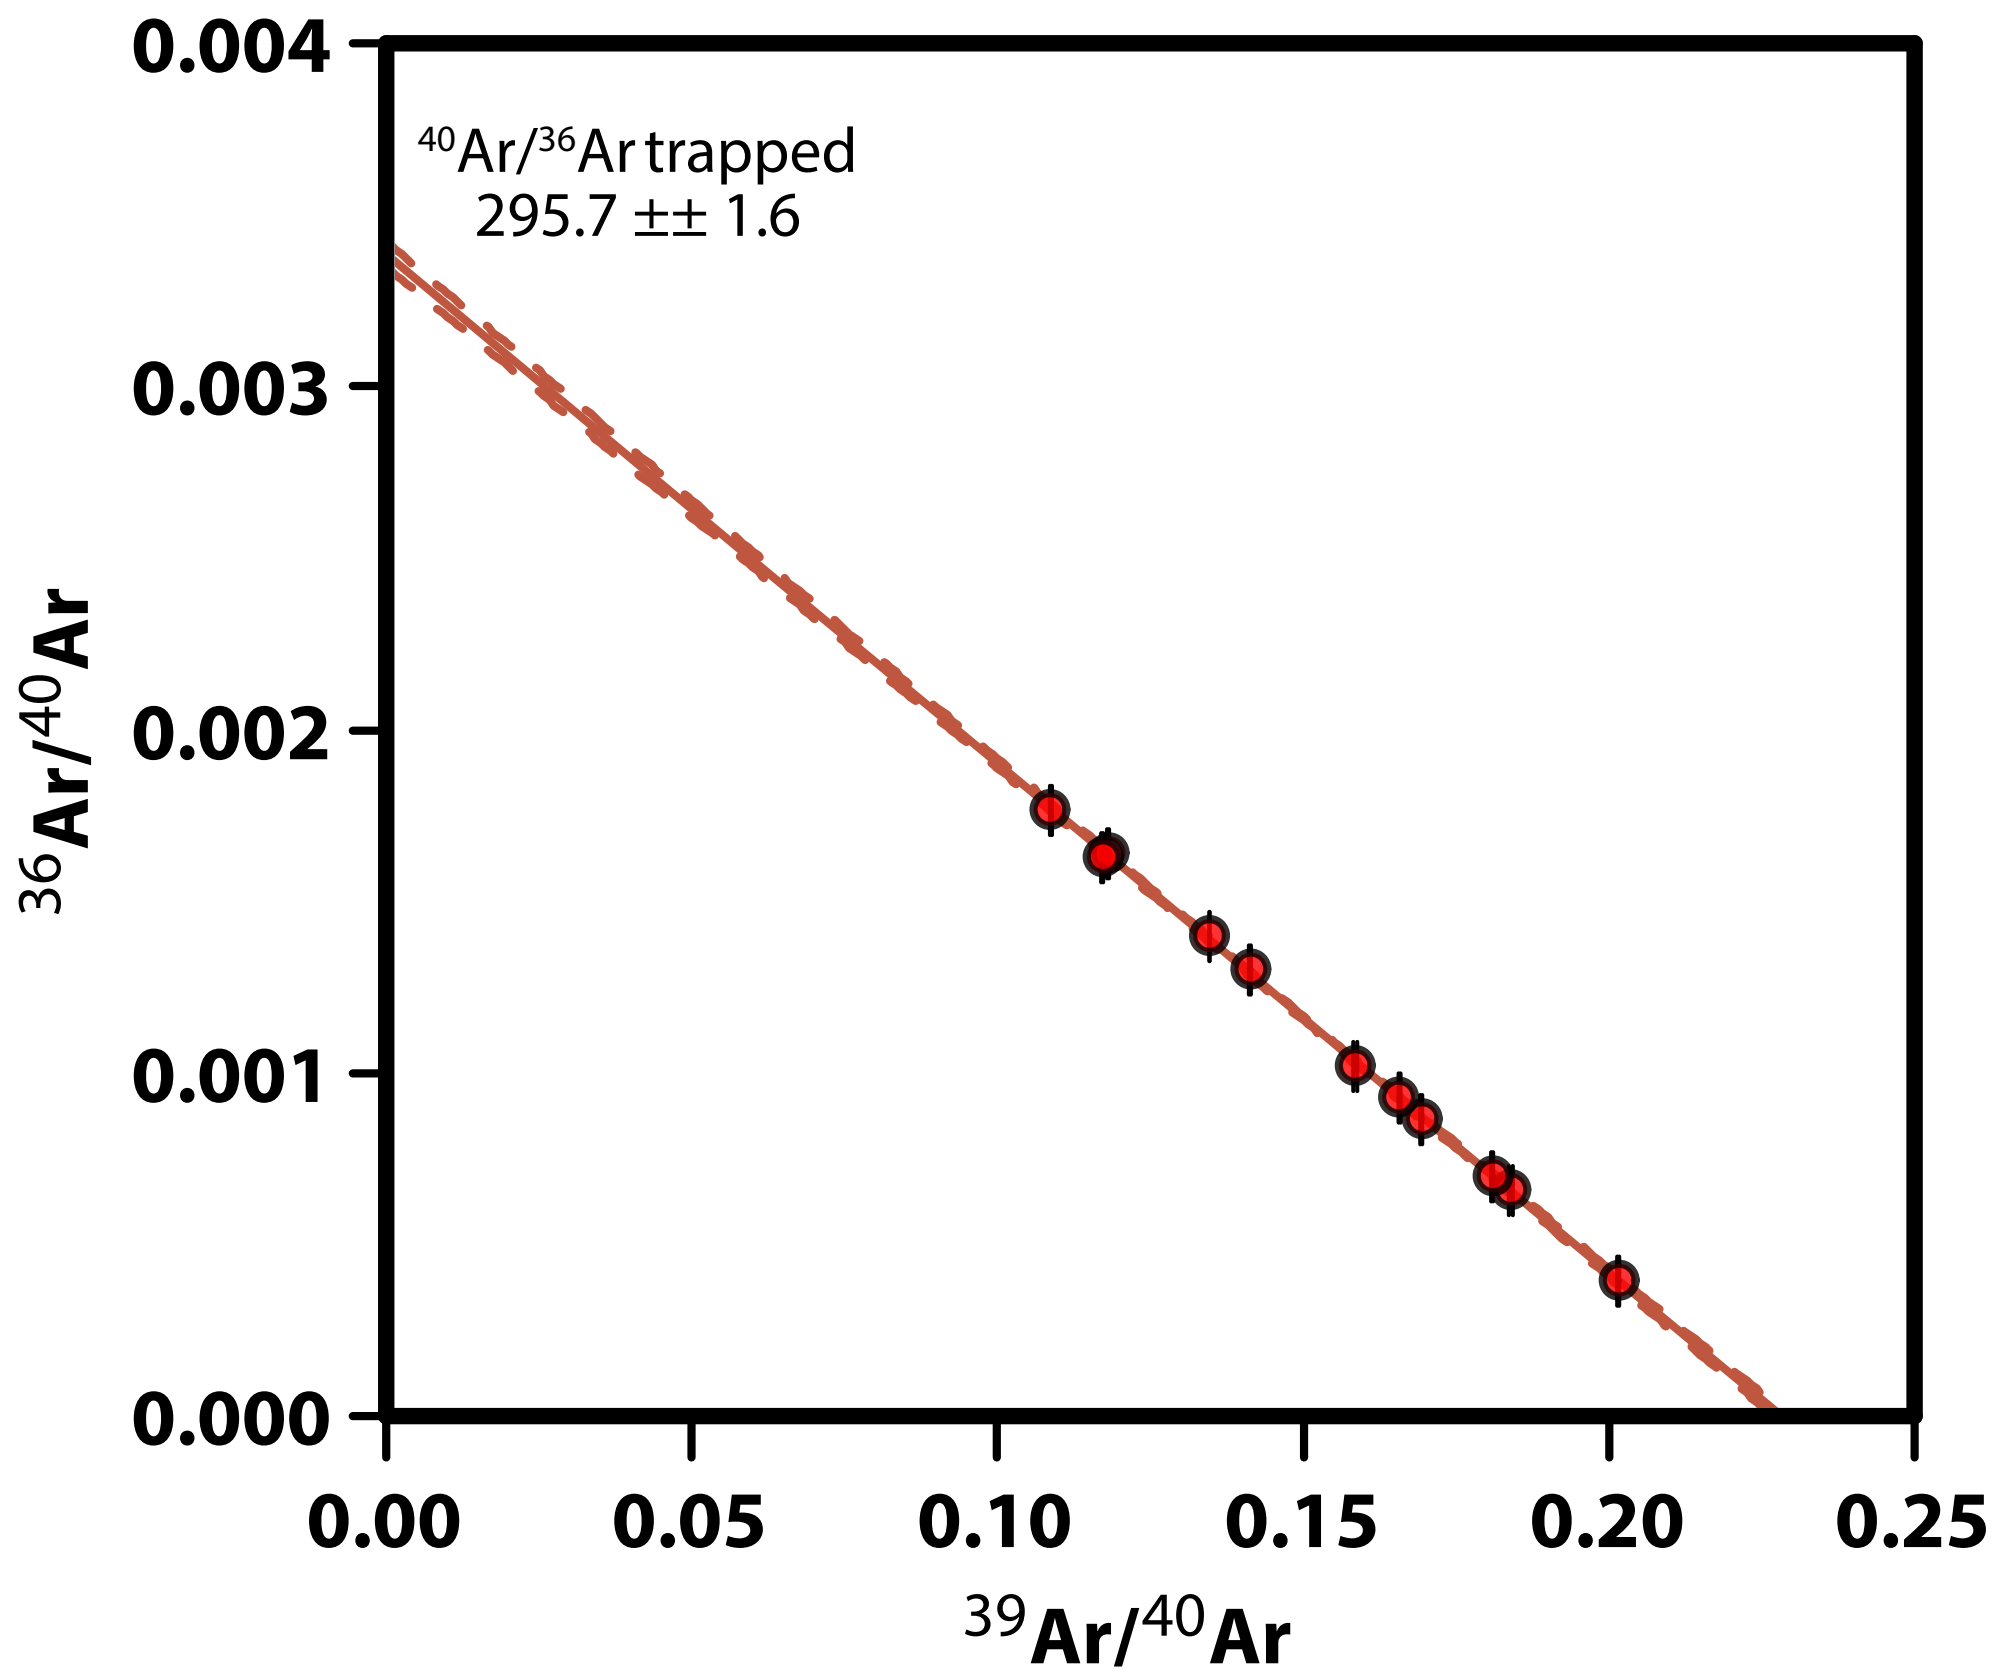



Tuff of Whitehorse Creek (TB-322)  
 $15.559 \pm \pm 0.044$  Ma

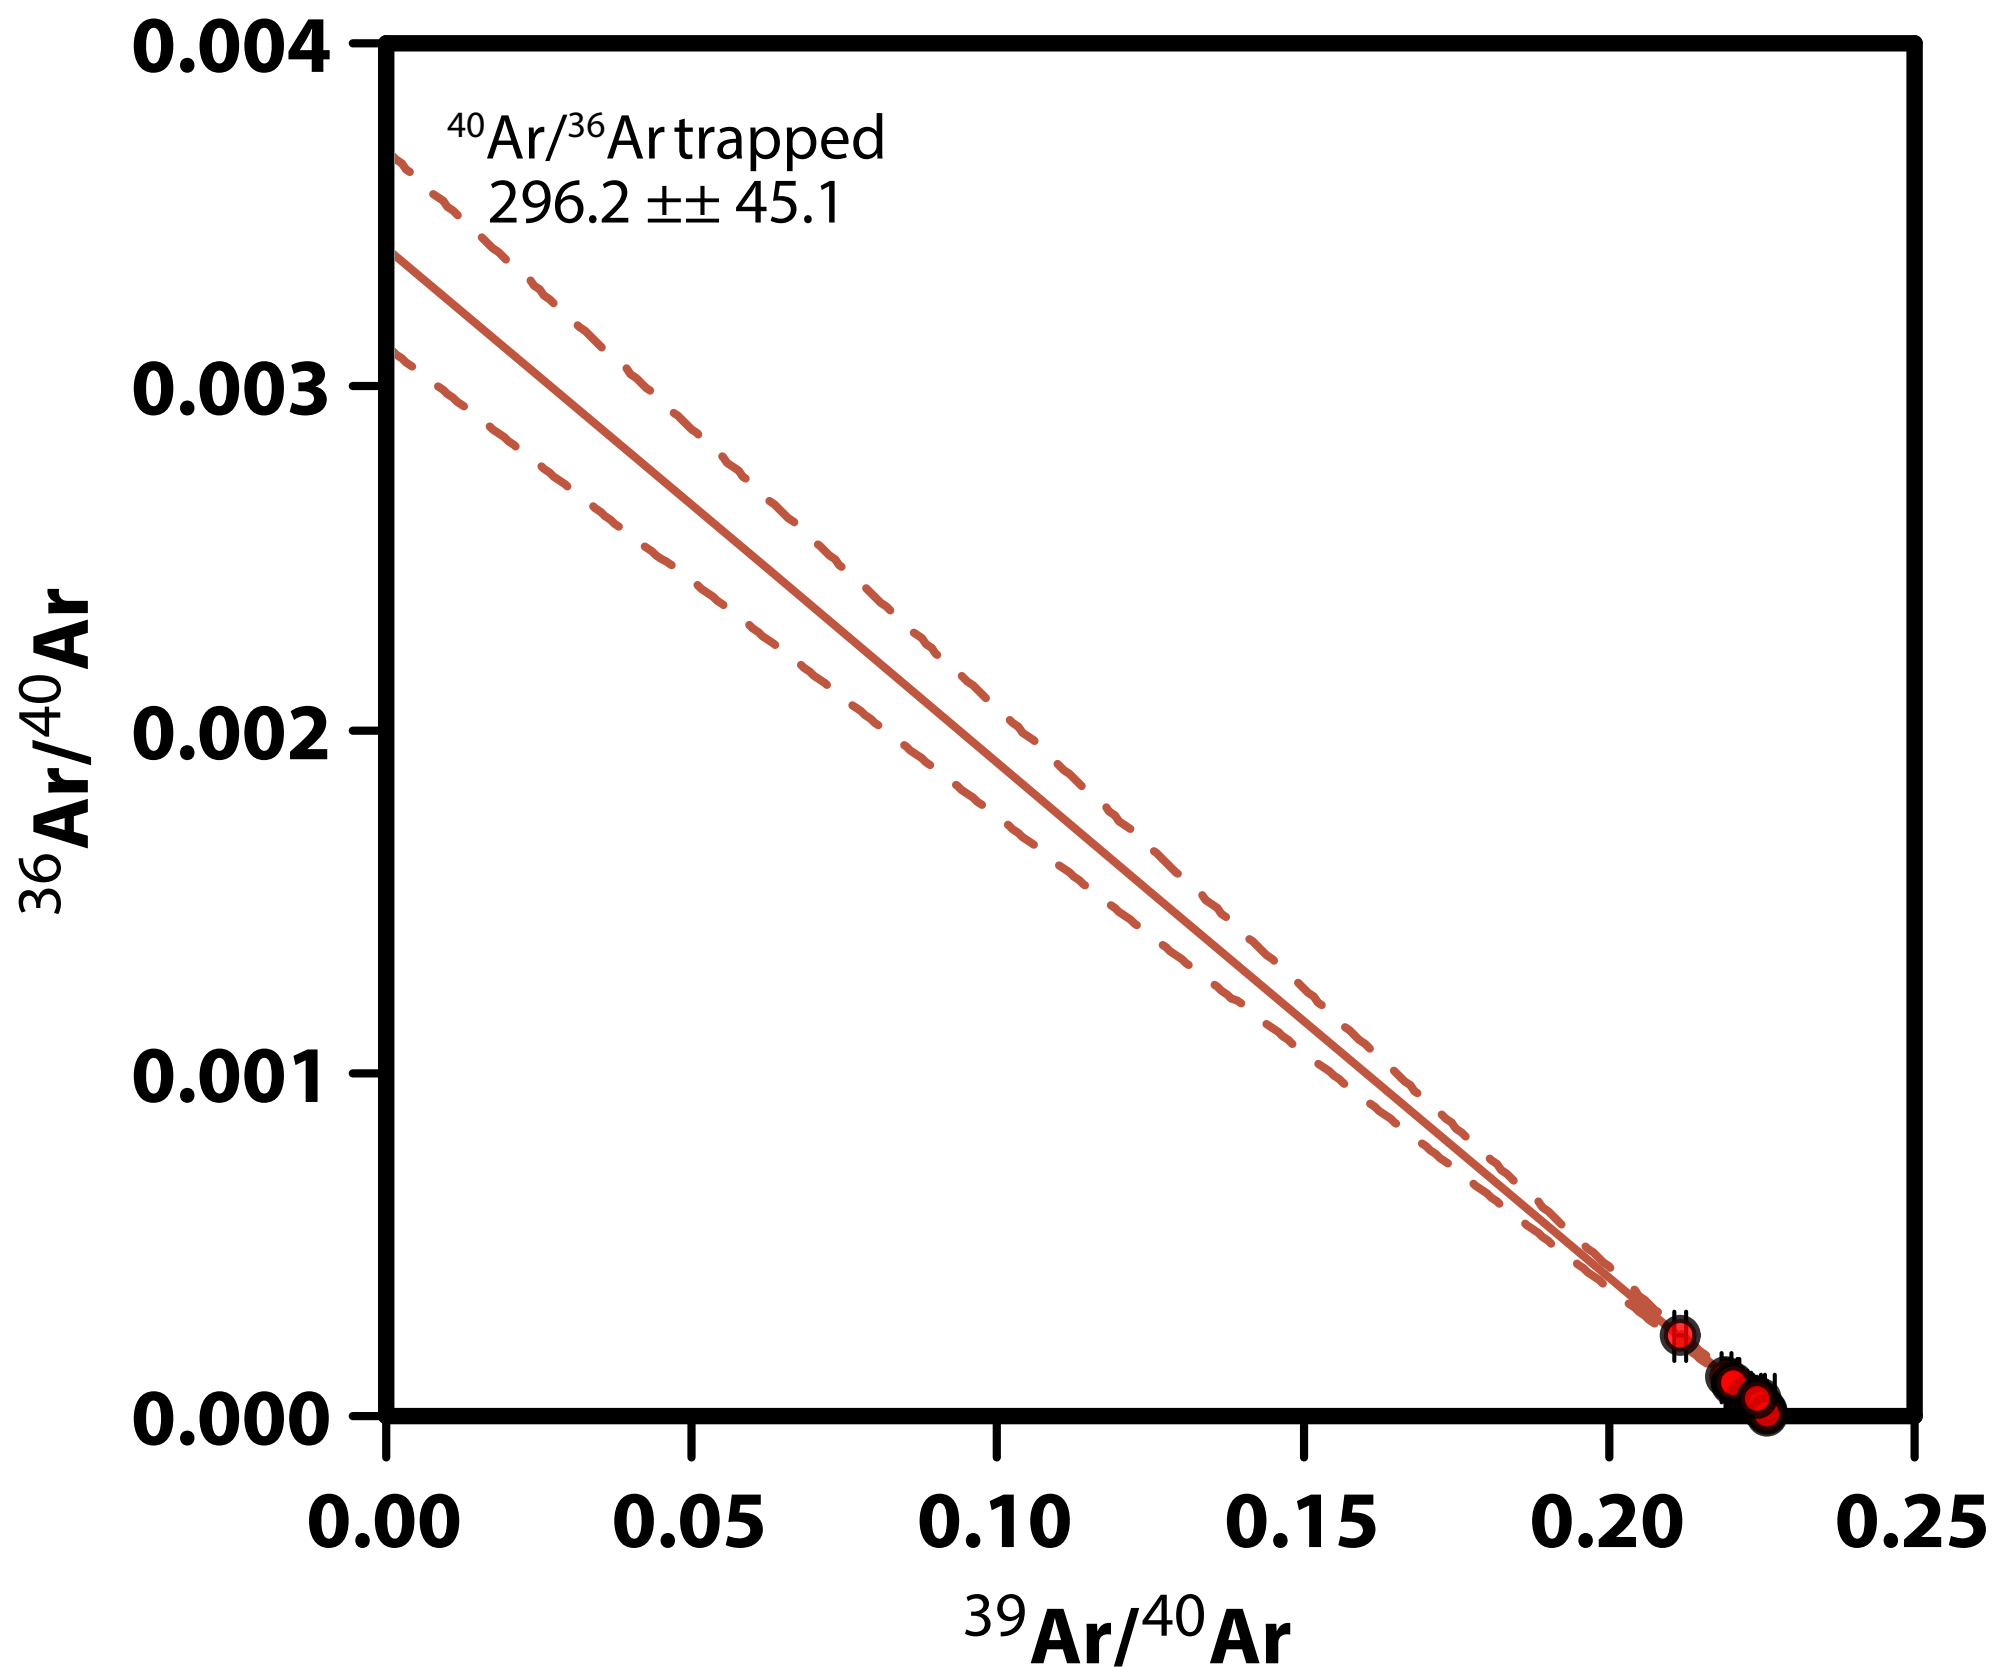

# N. Flagstaff Ranch rhyolite lava (TB-331)

$15.570 \pm \pm 0.023$  Ma

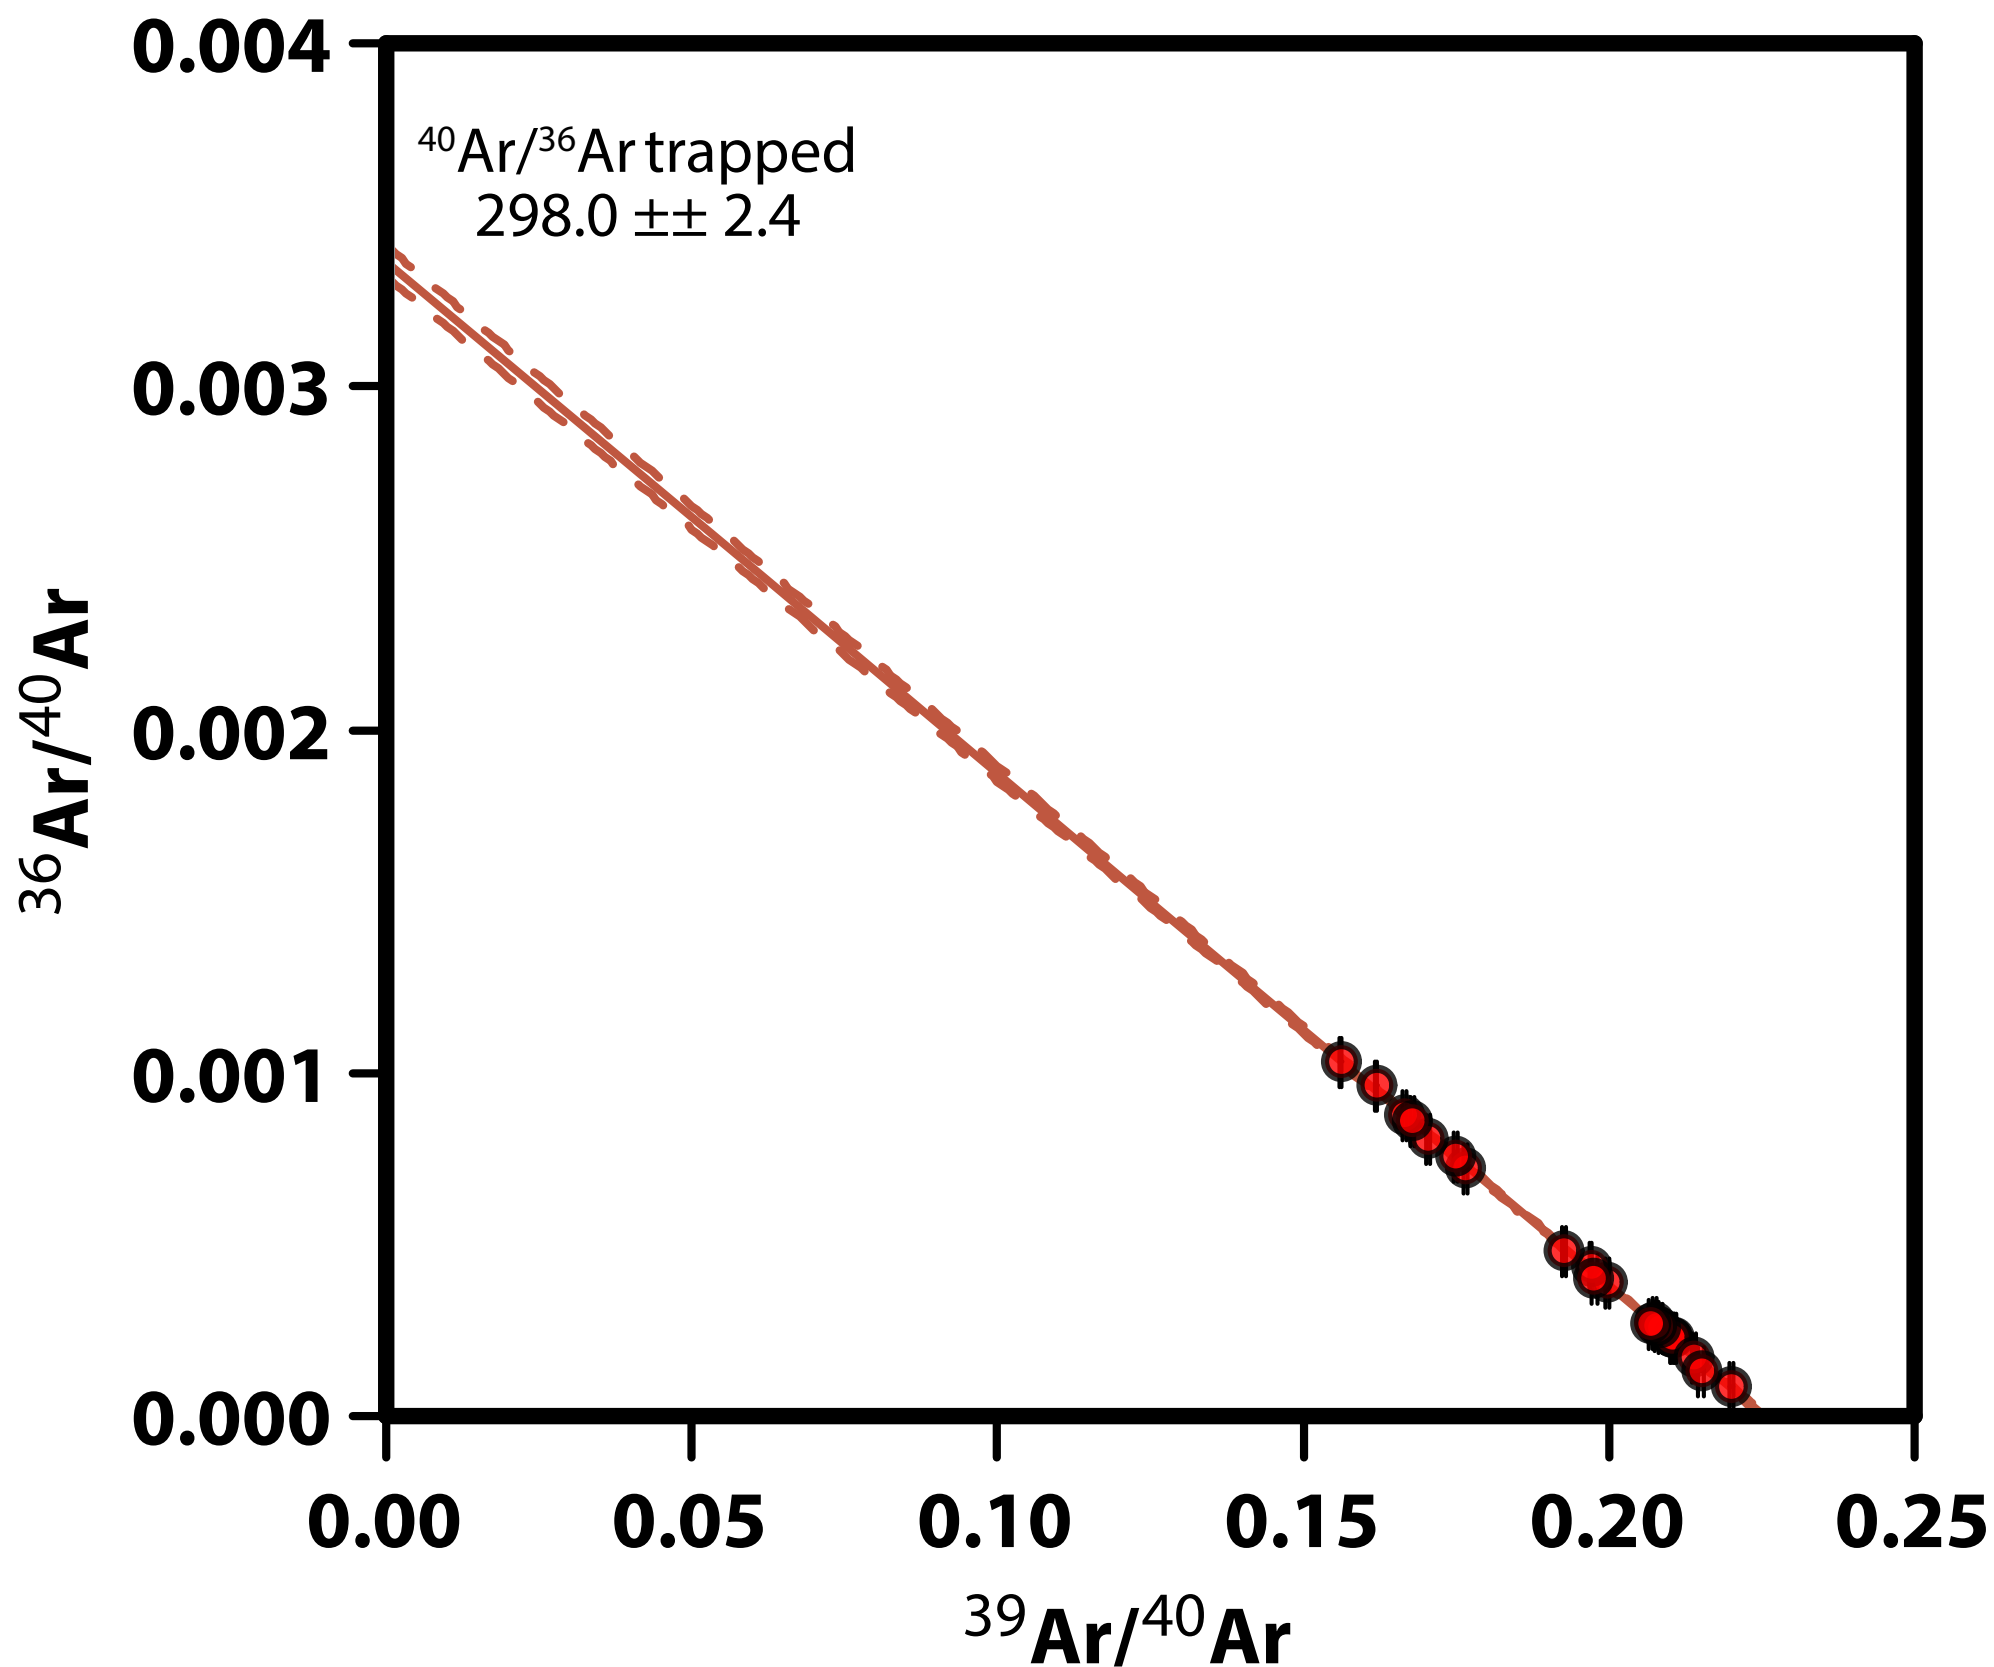

# Whitehose Butte rhyolite lava (TB-342)

15.581  $\pm$  0.021 Ma

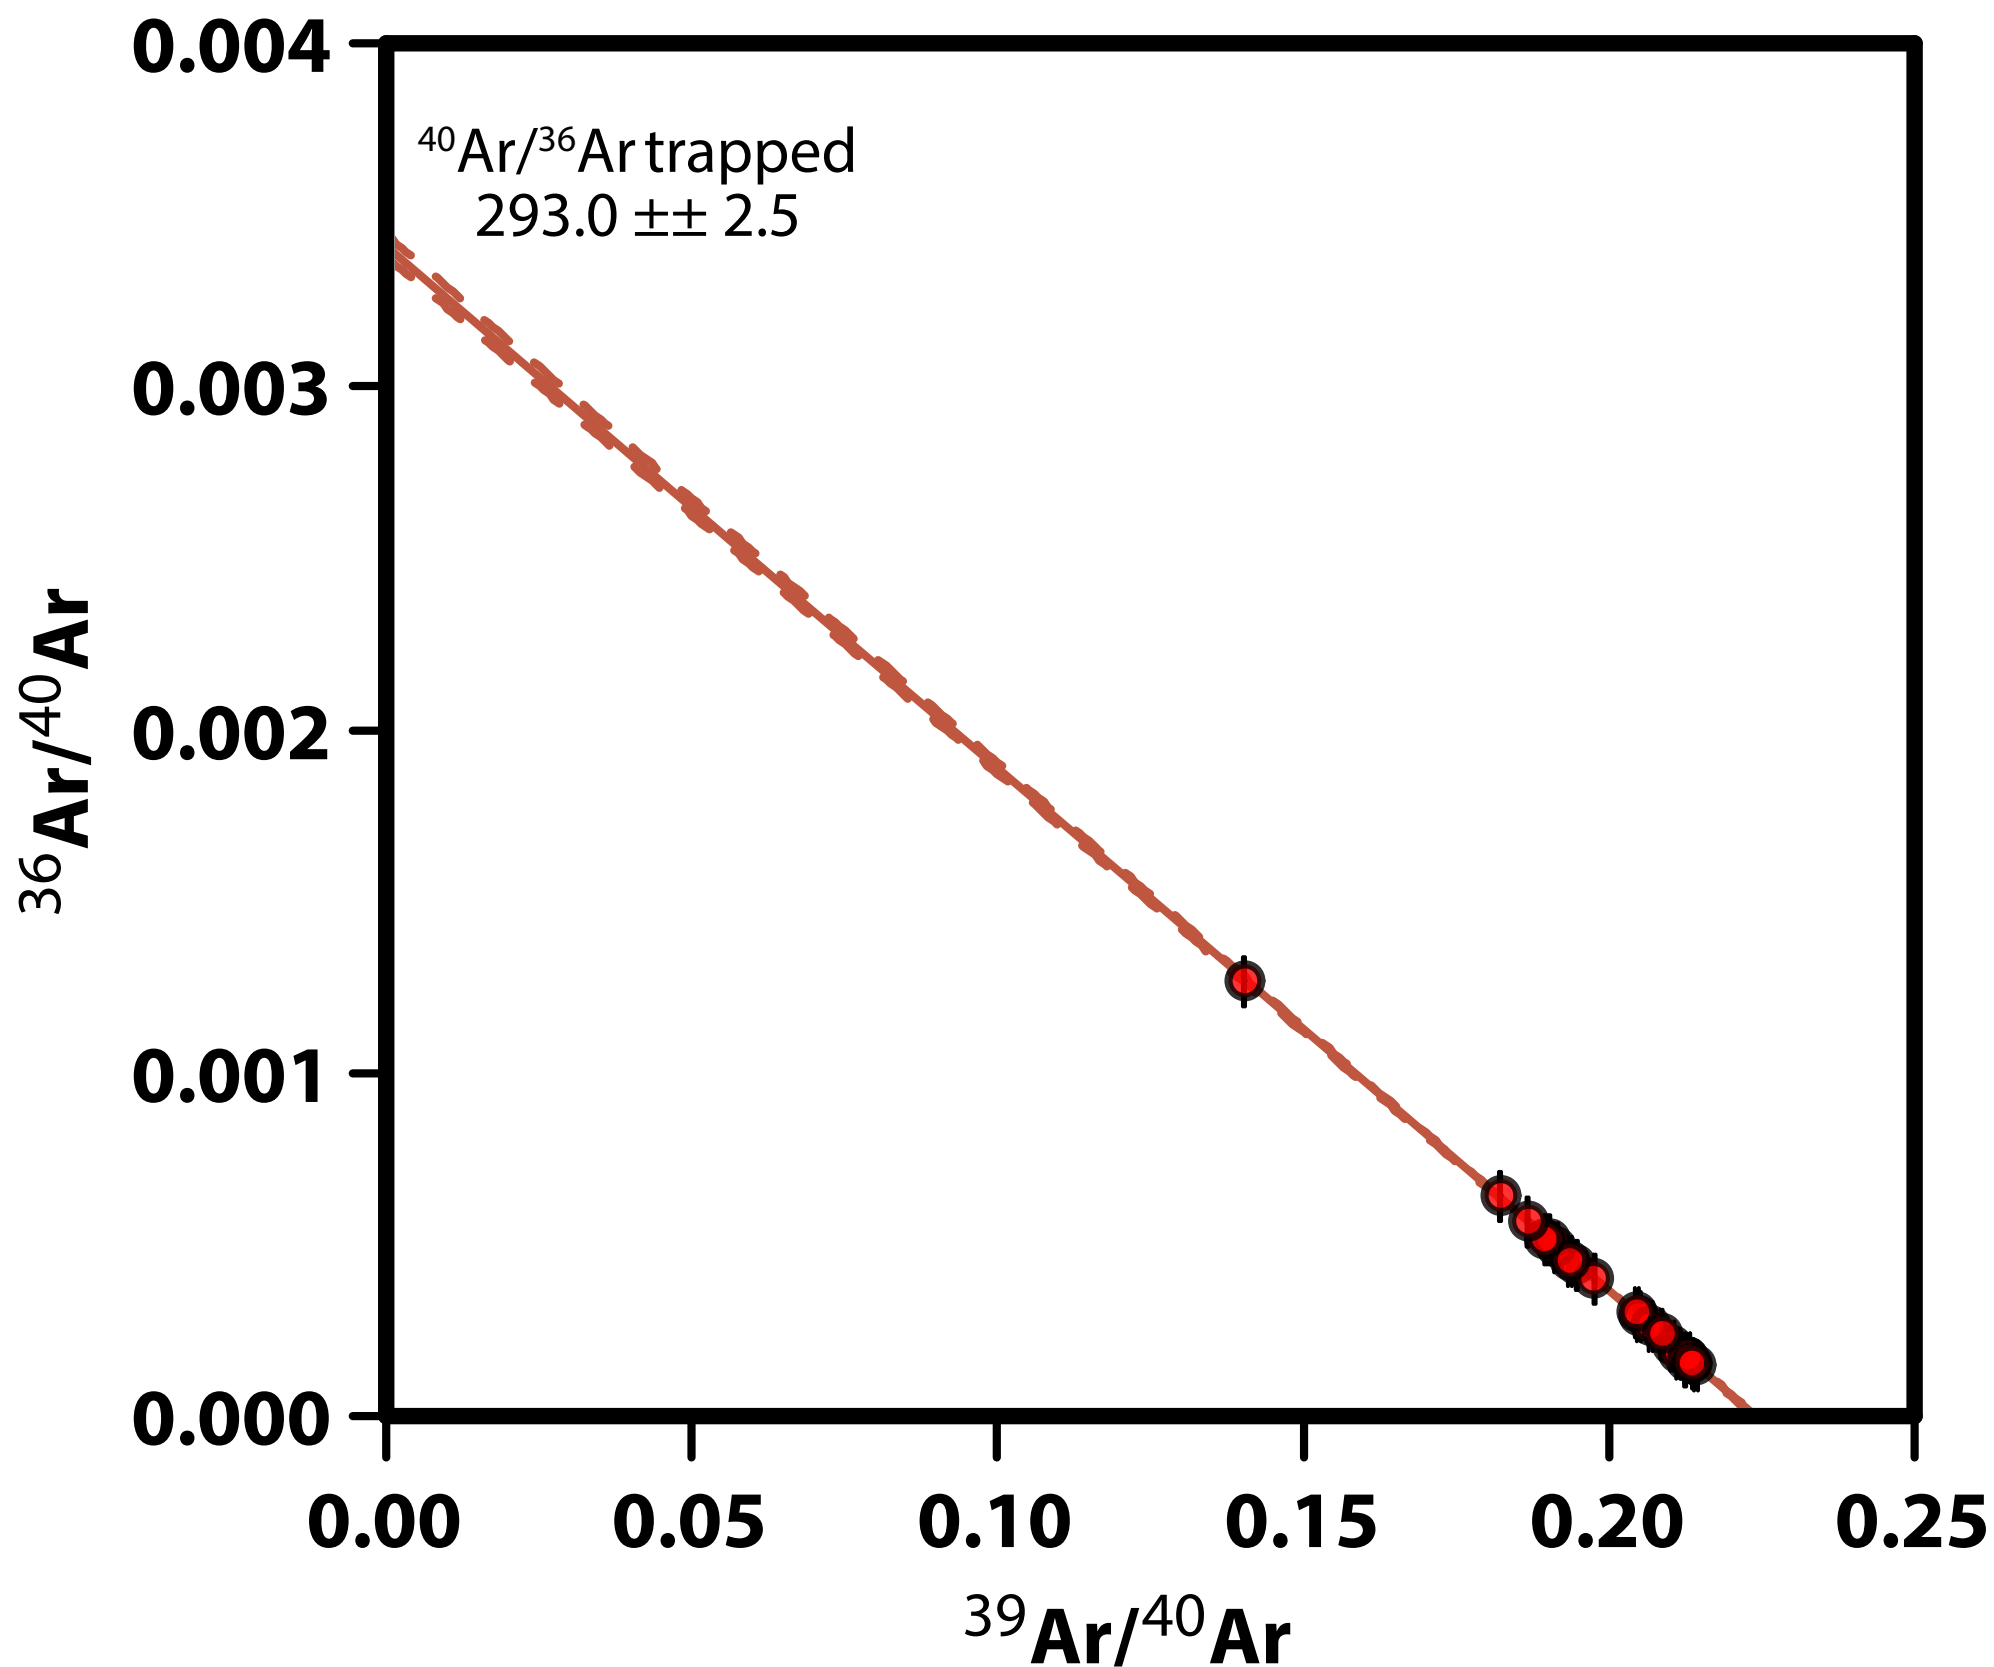

# Fish Creek rhyolite lava (TB-354)

16.445  $\pm$  0.022 Ma

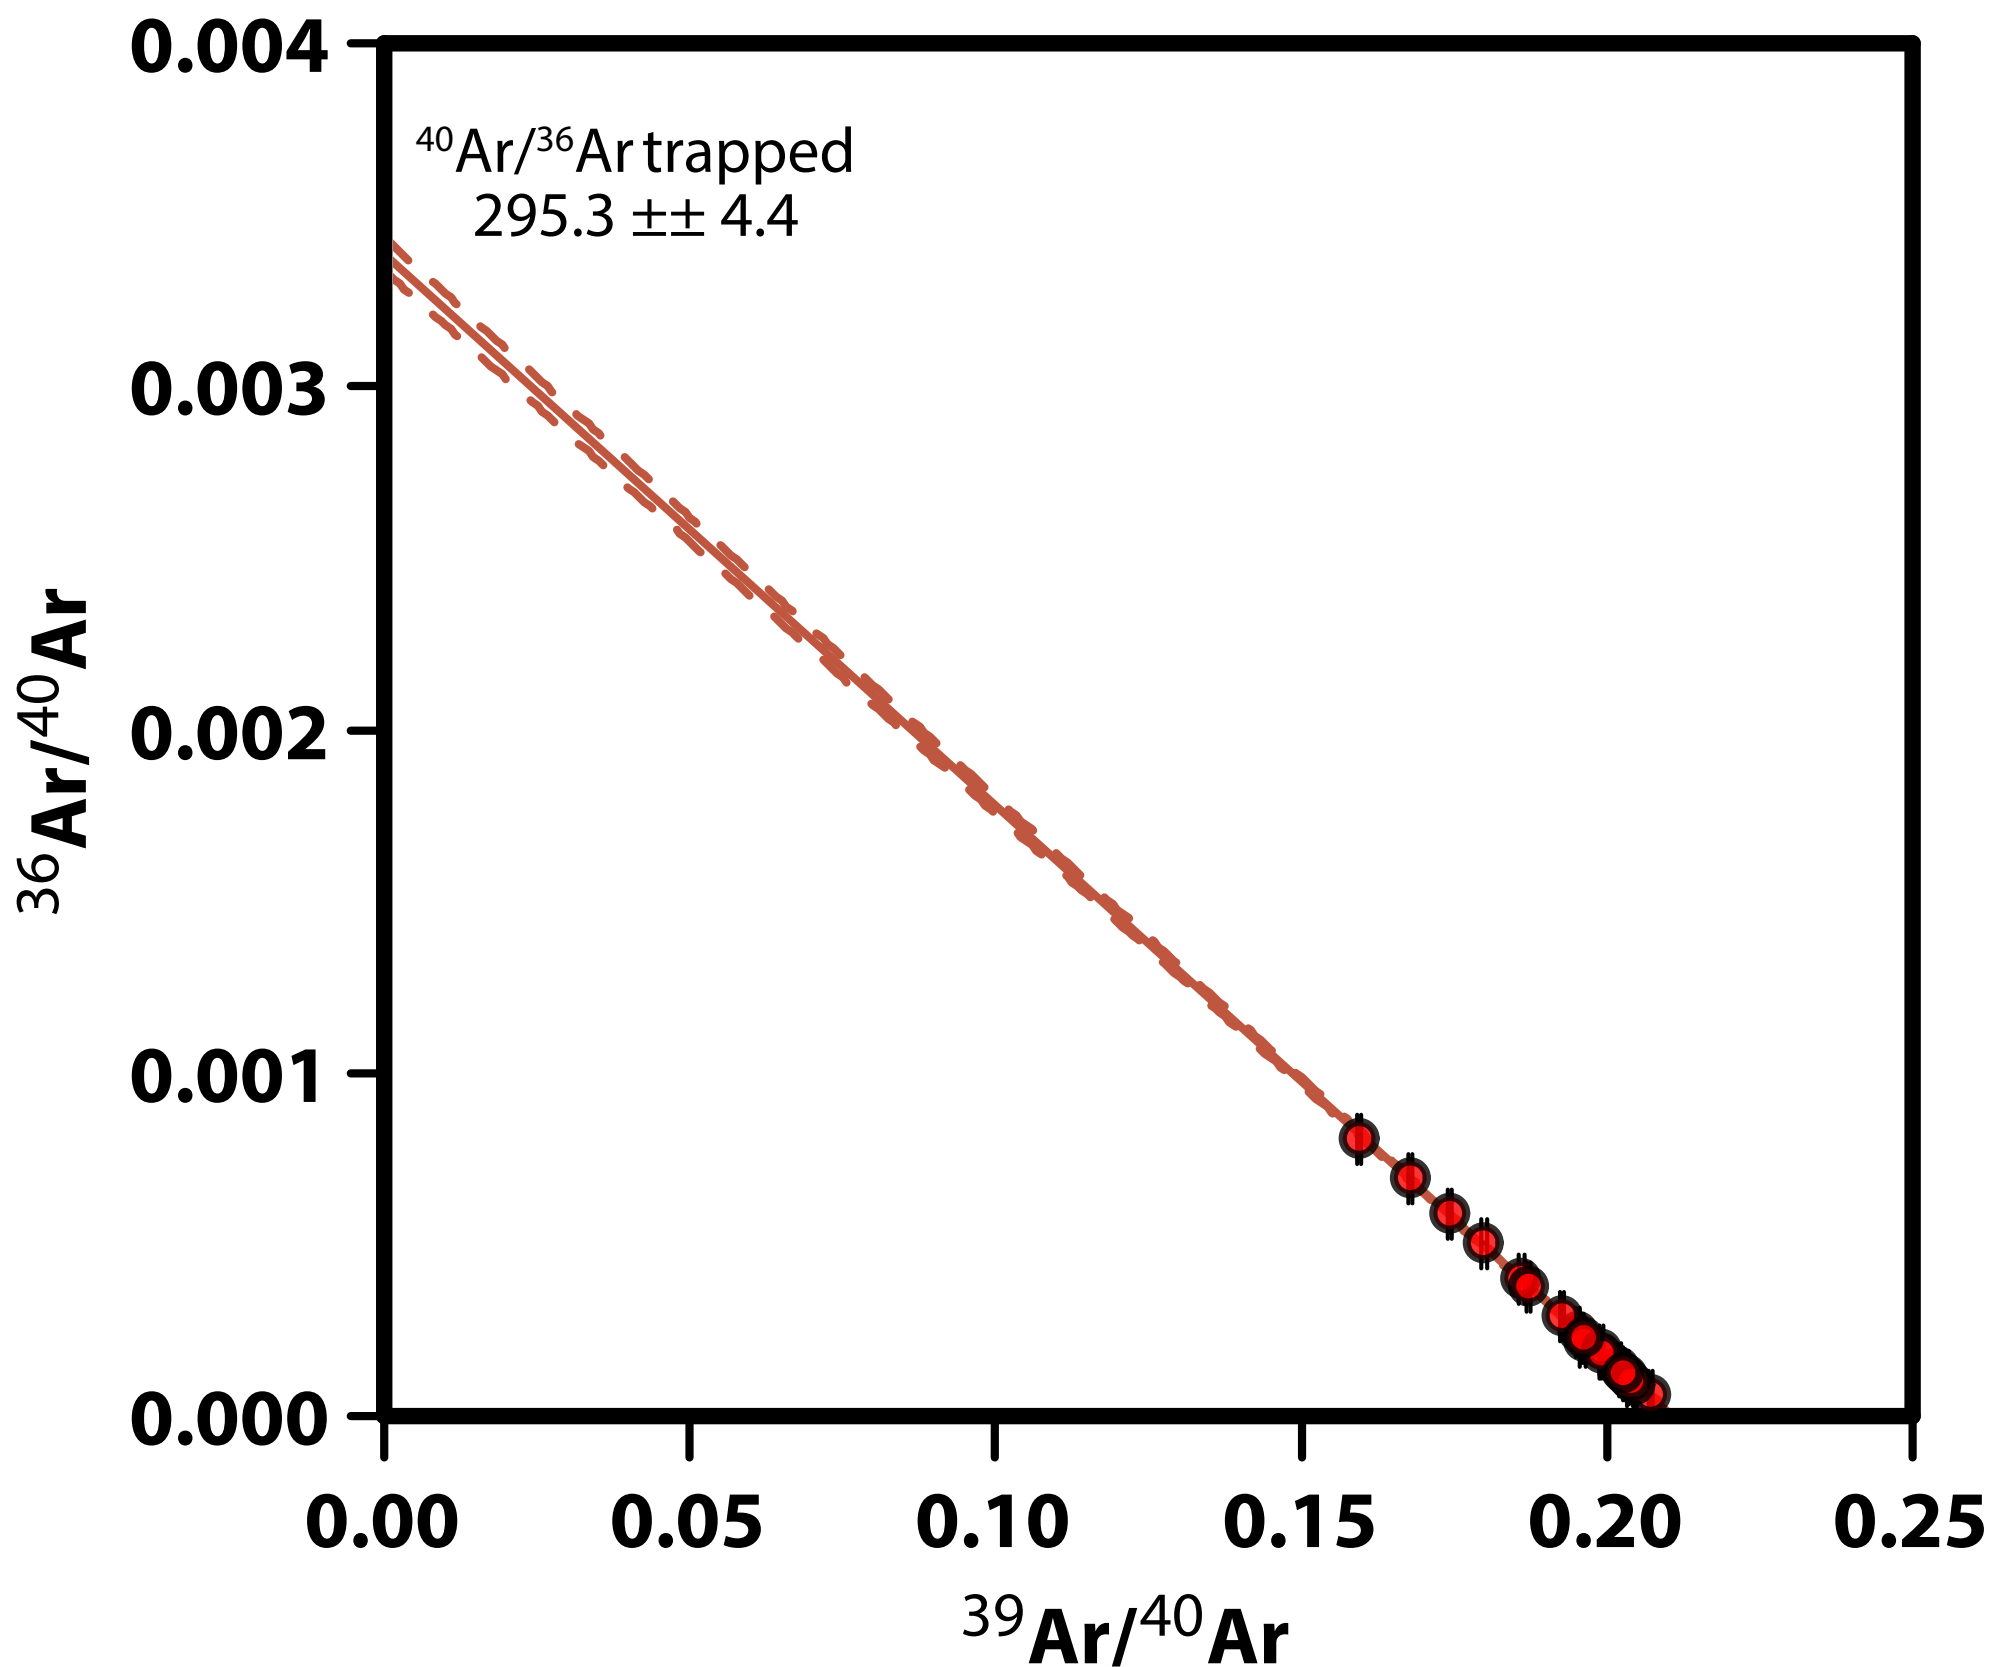

# Whitehorse Cyn rhyolite lava (TB-355)

$16.539 \pm \pm 0.039$  Ma

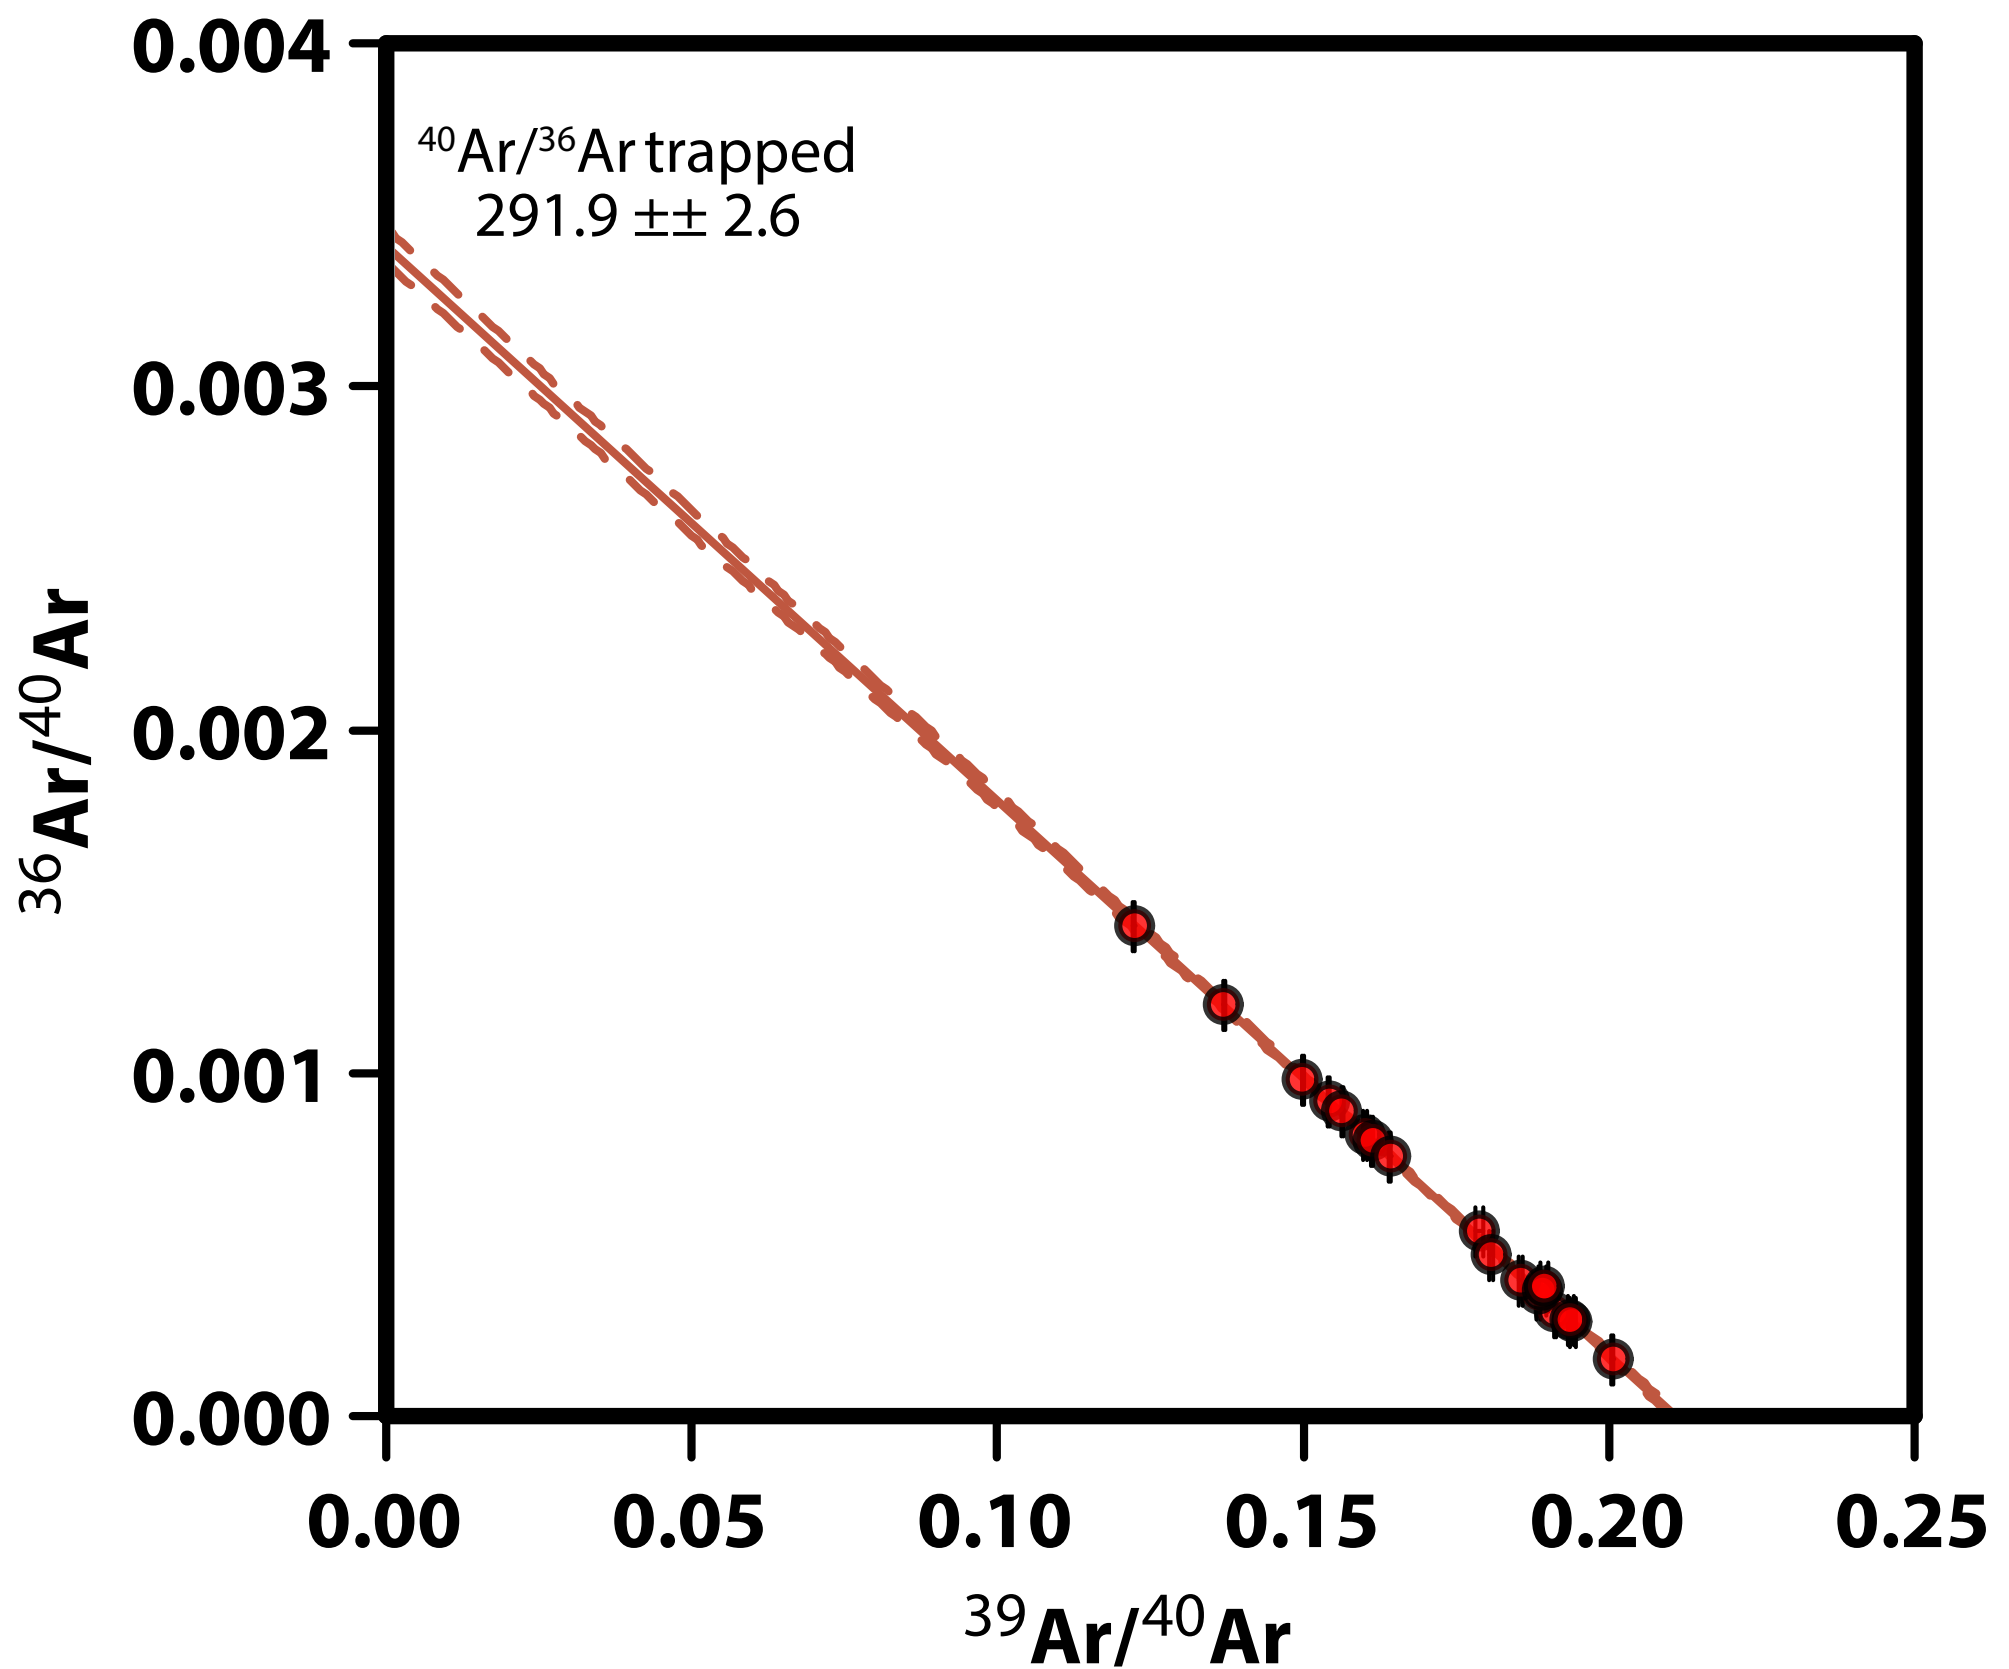

# Bearclaw rhyolite lava (TB-362A)

$15.540 \pm \pm 0.022$  Ma

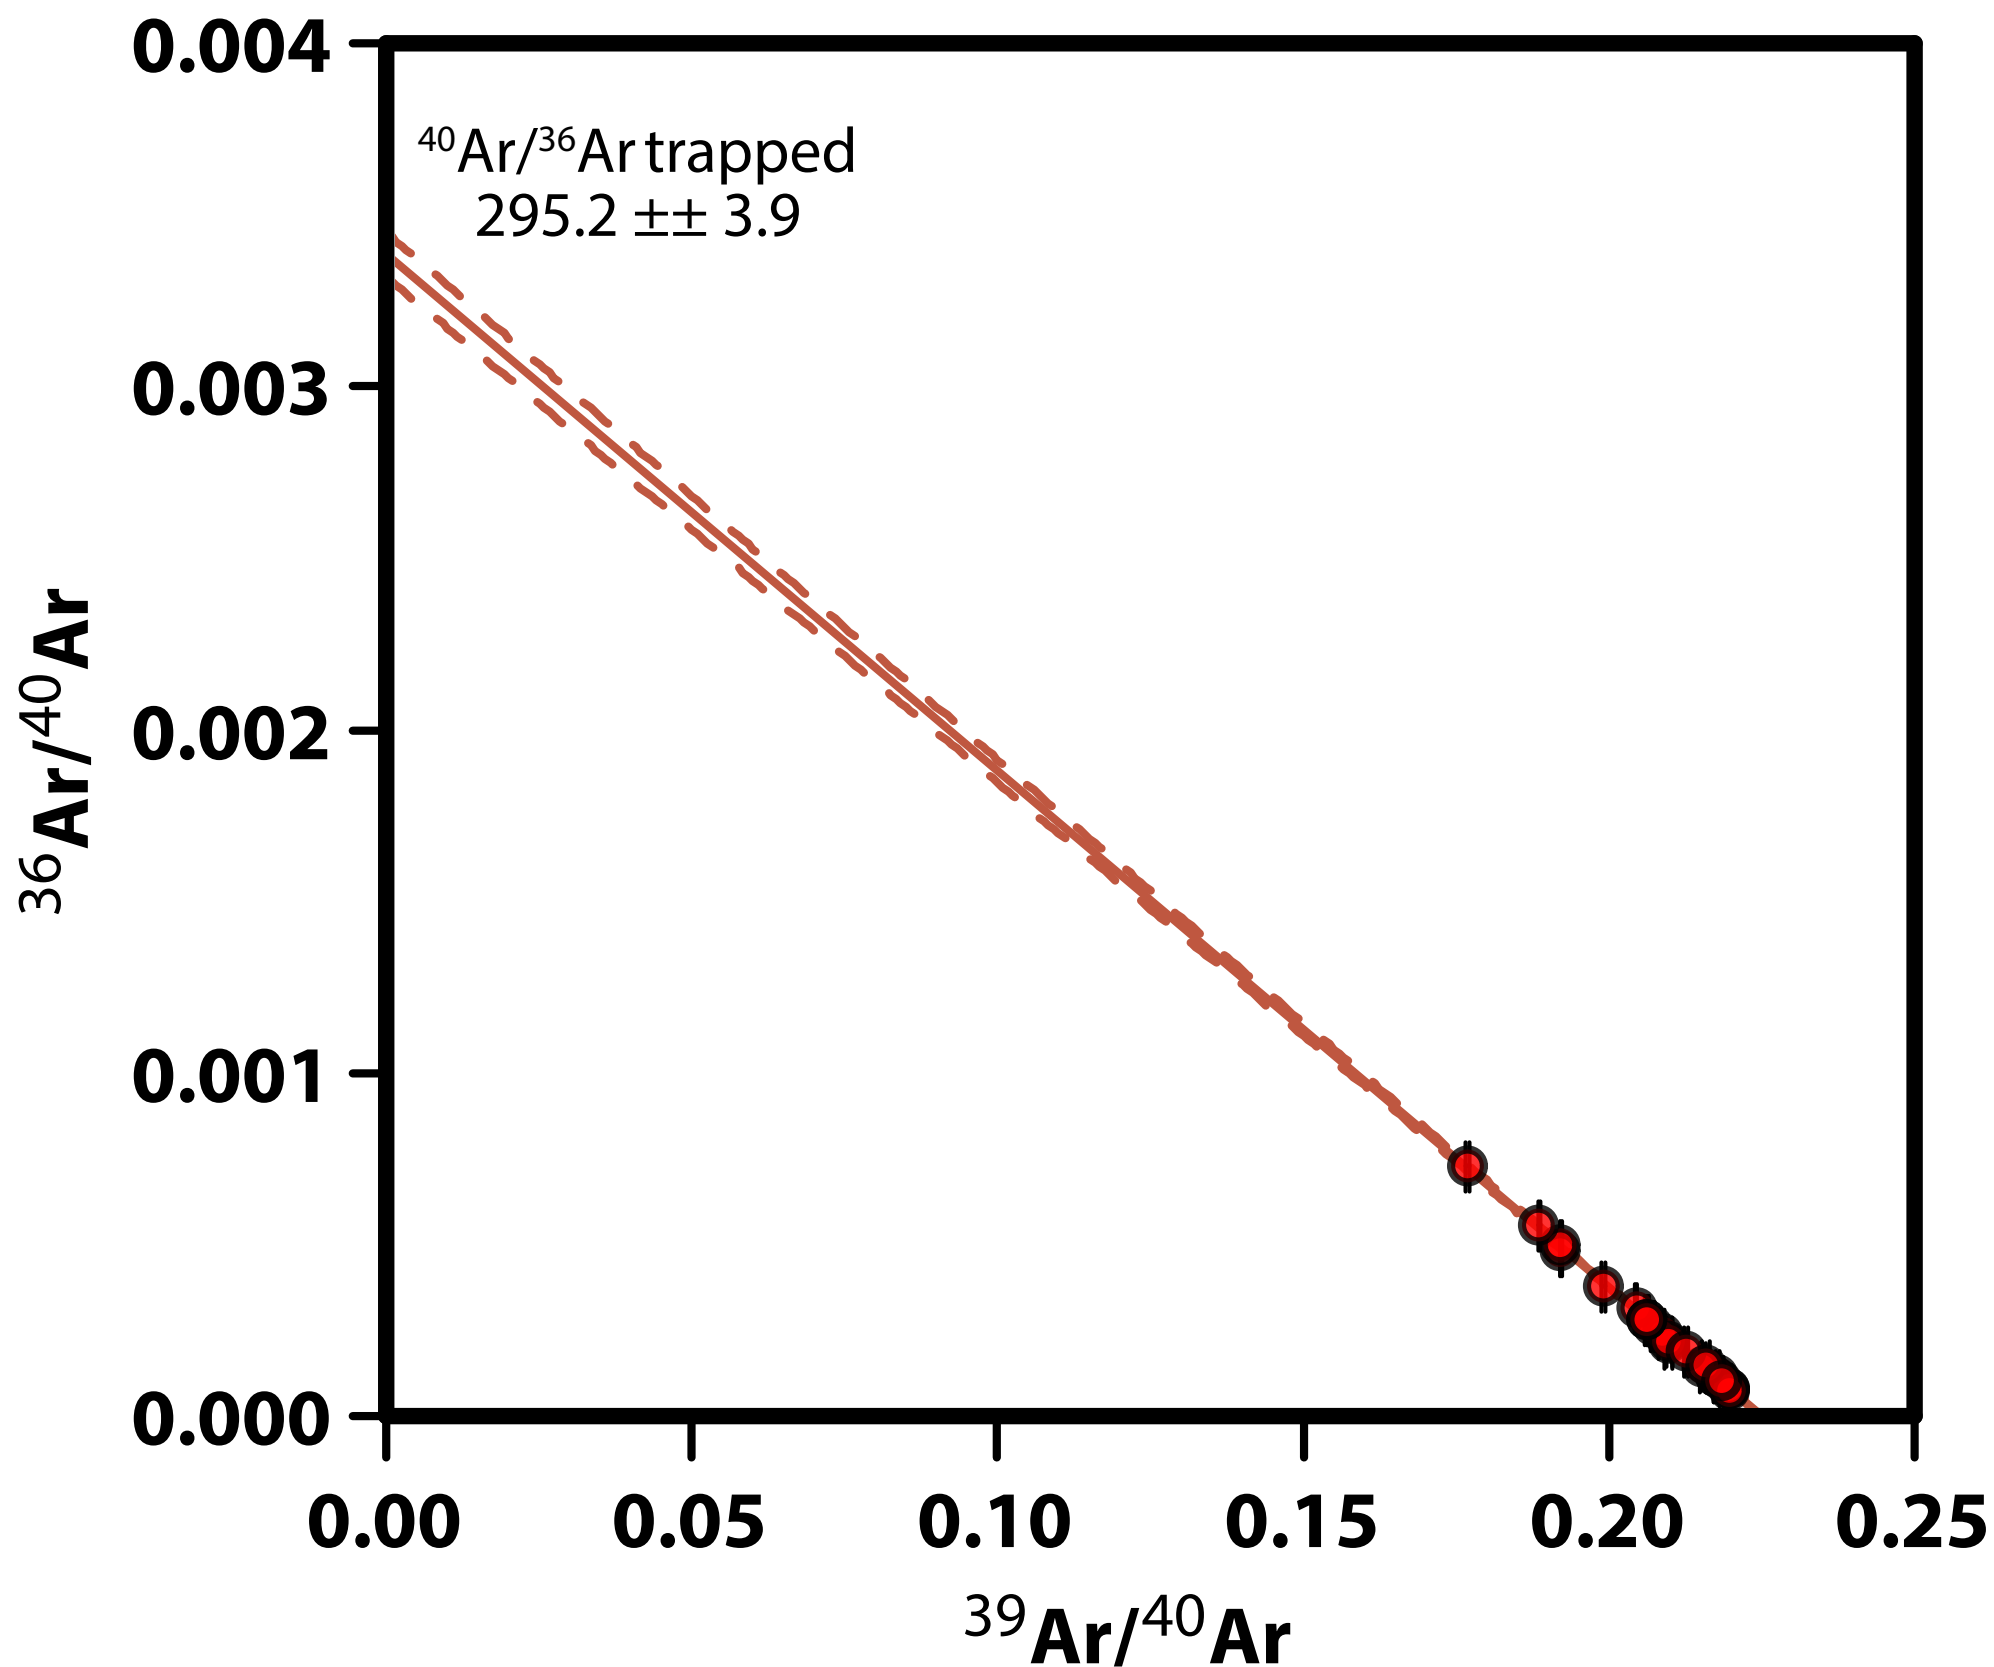

# Tuff of Oregon Canyon (TB-429)

$16.450 \pm \pm 0.015$  Ma

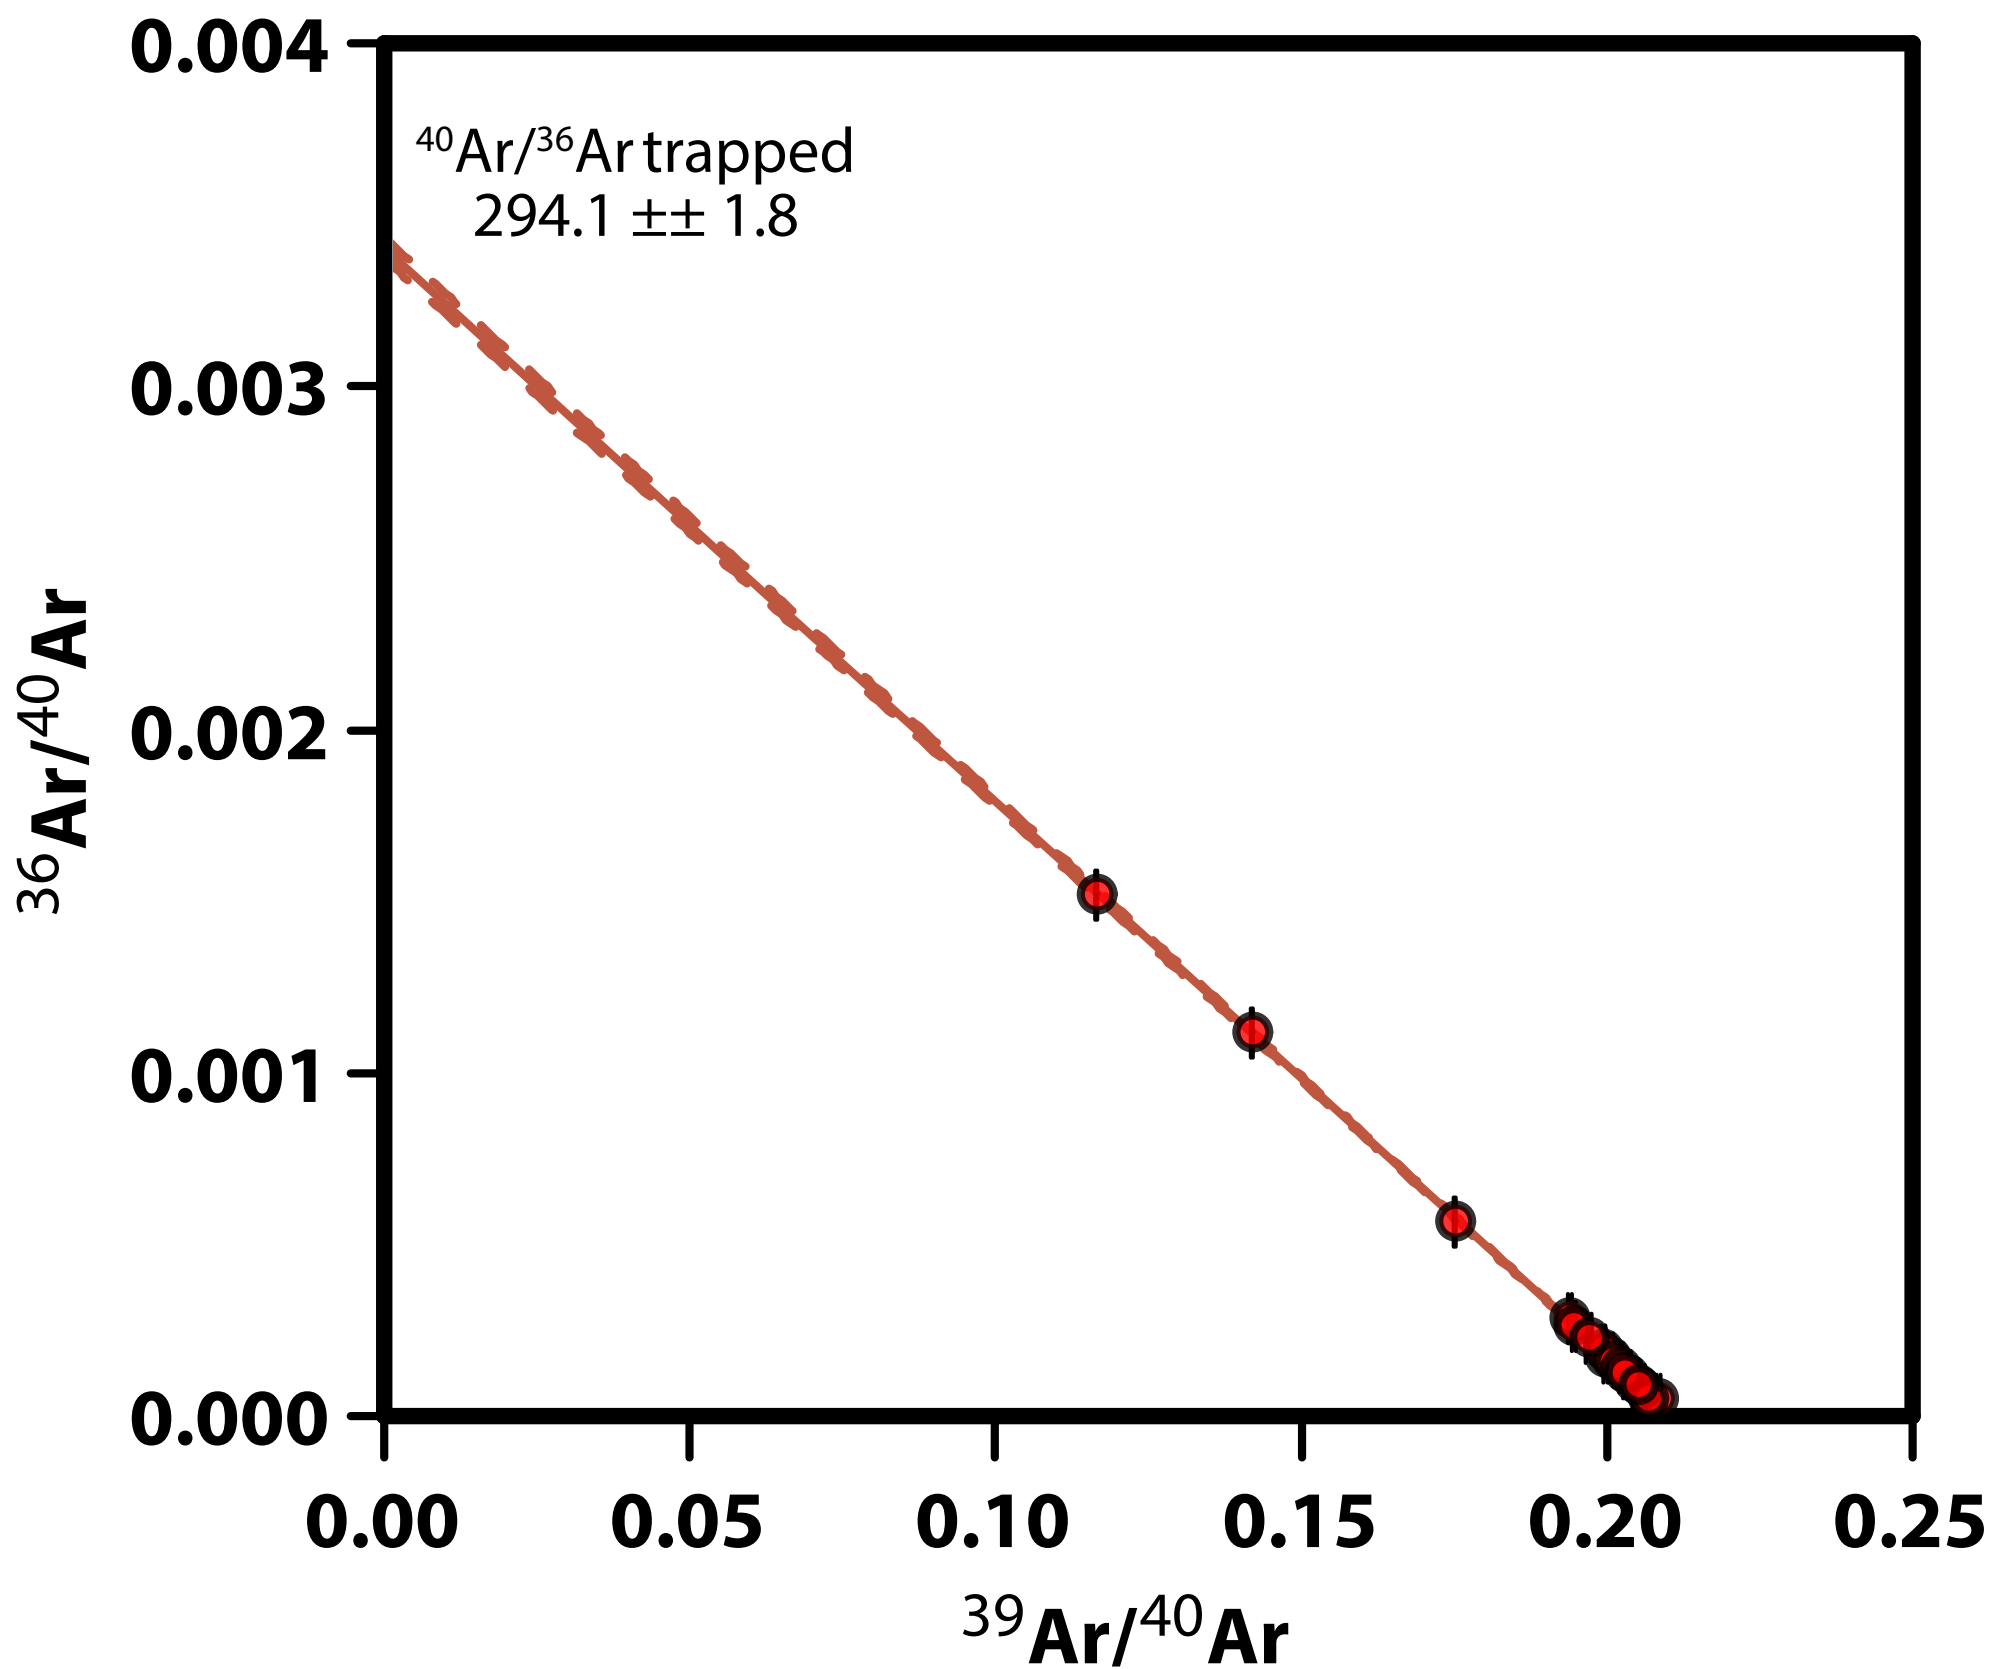

# Tuff of Oregon Canyon (TB-433)

$16.468 \pm \pm 0.015$  Ma

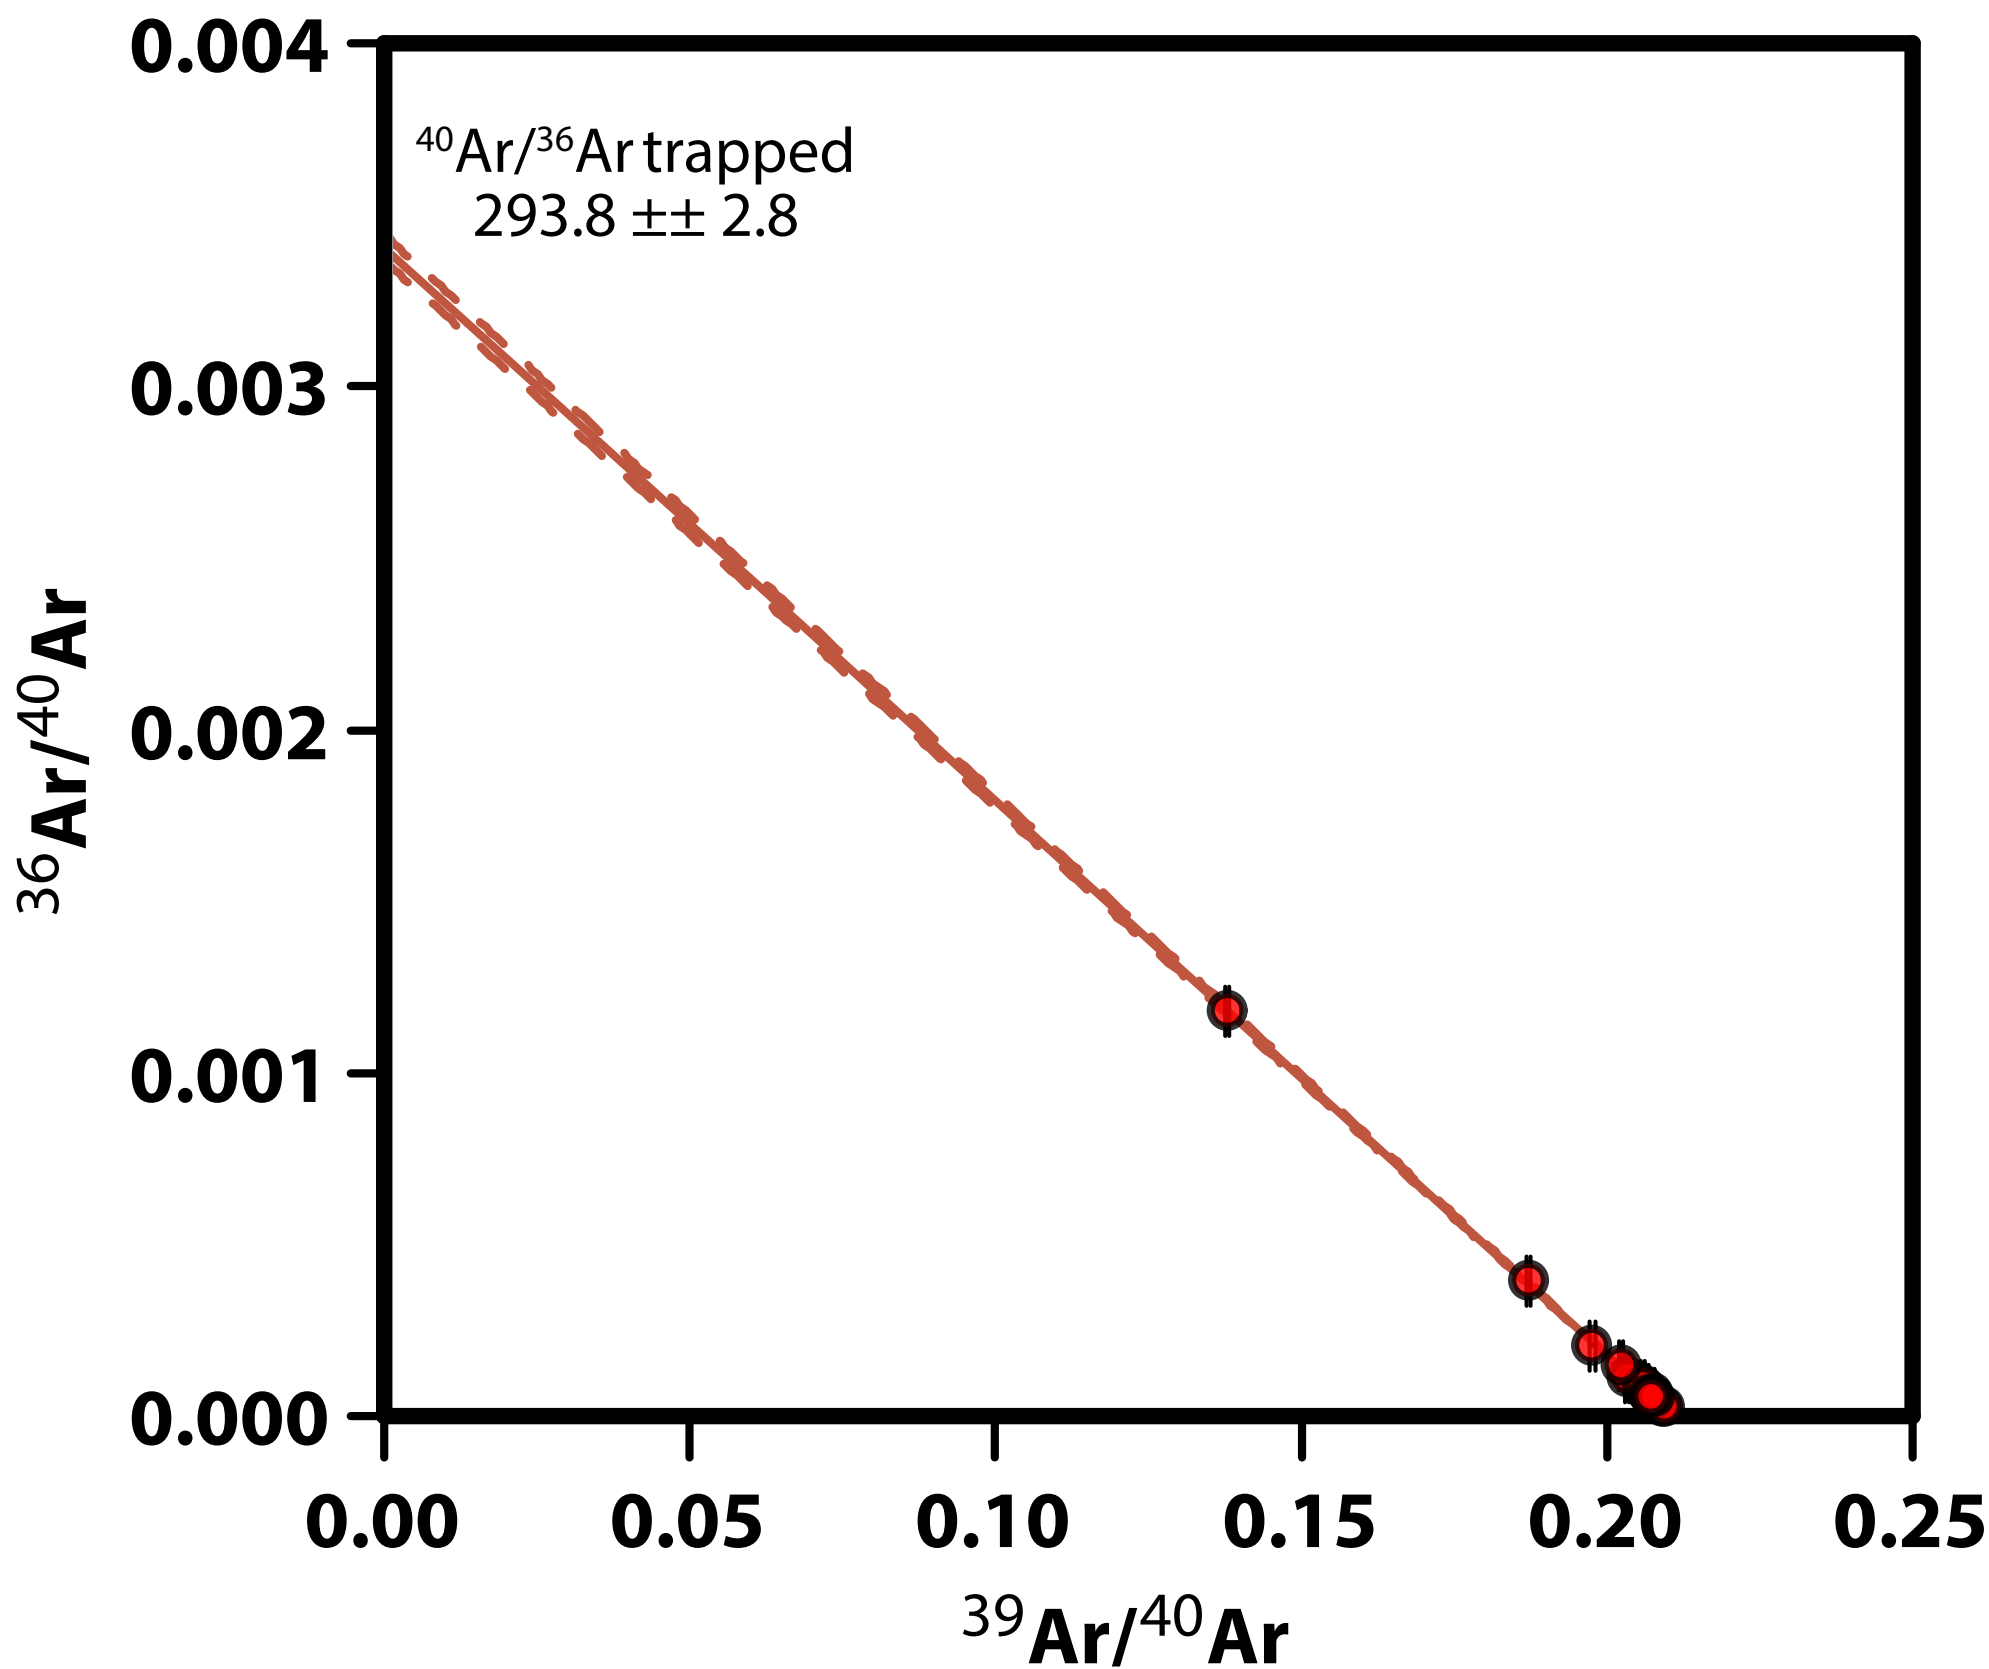



# Tuff of Oregon Canyon (TB-435)

$16.457 \pm \pm 0.017$  Ma

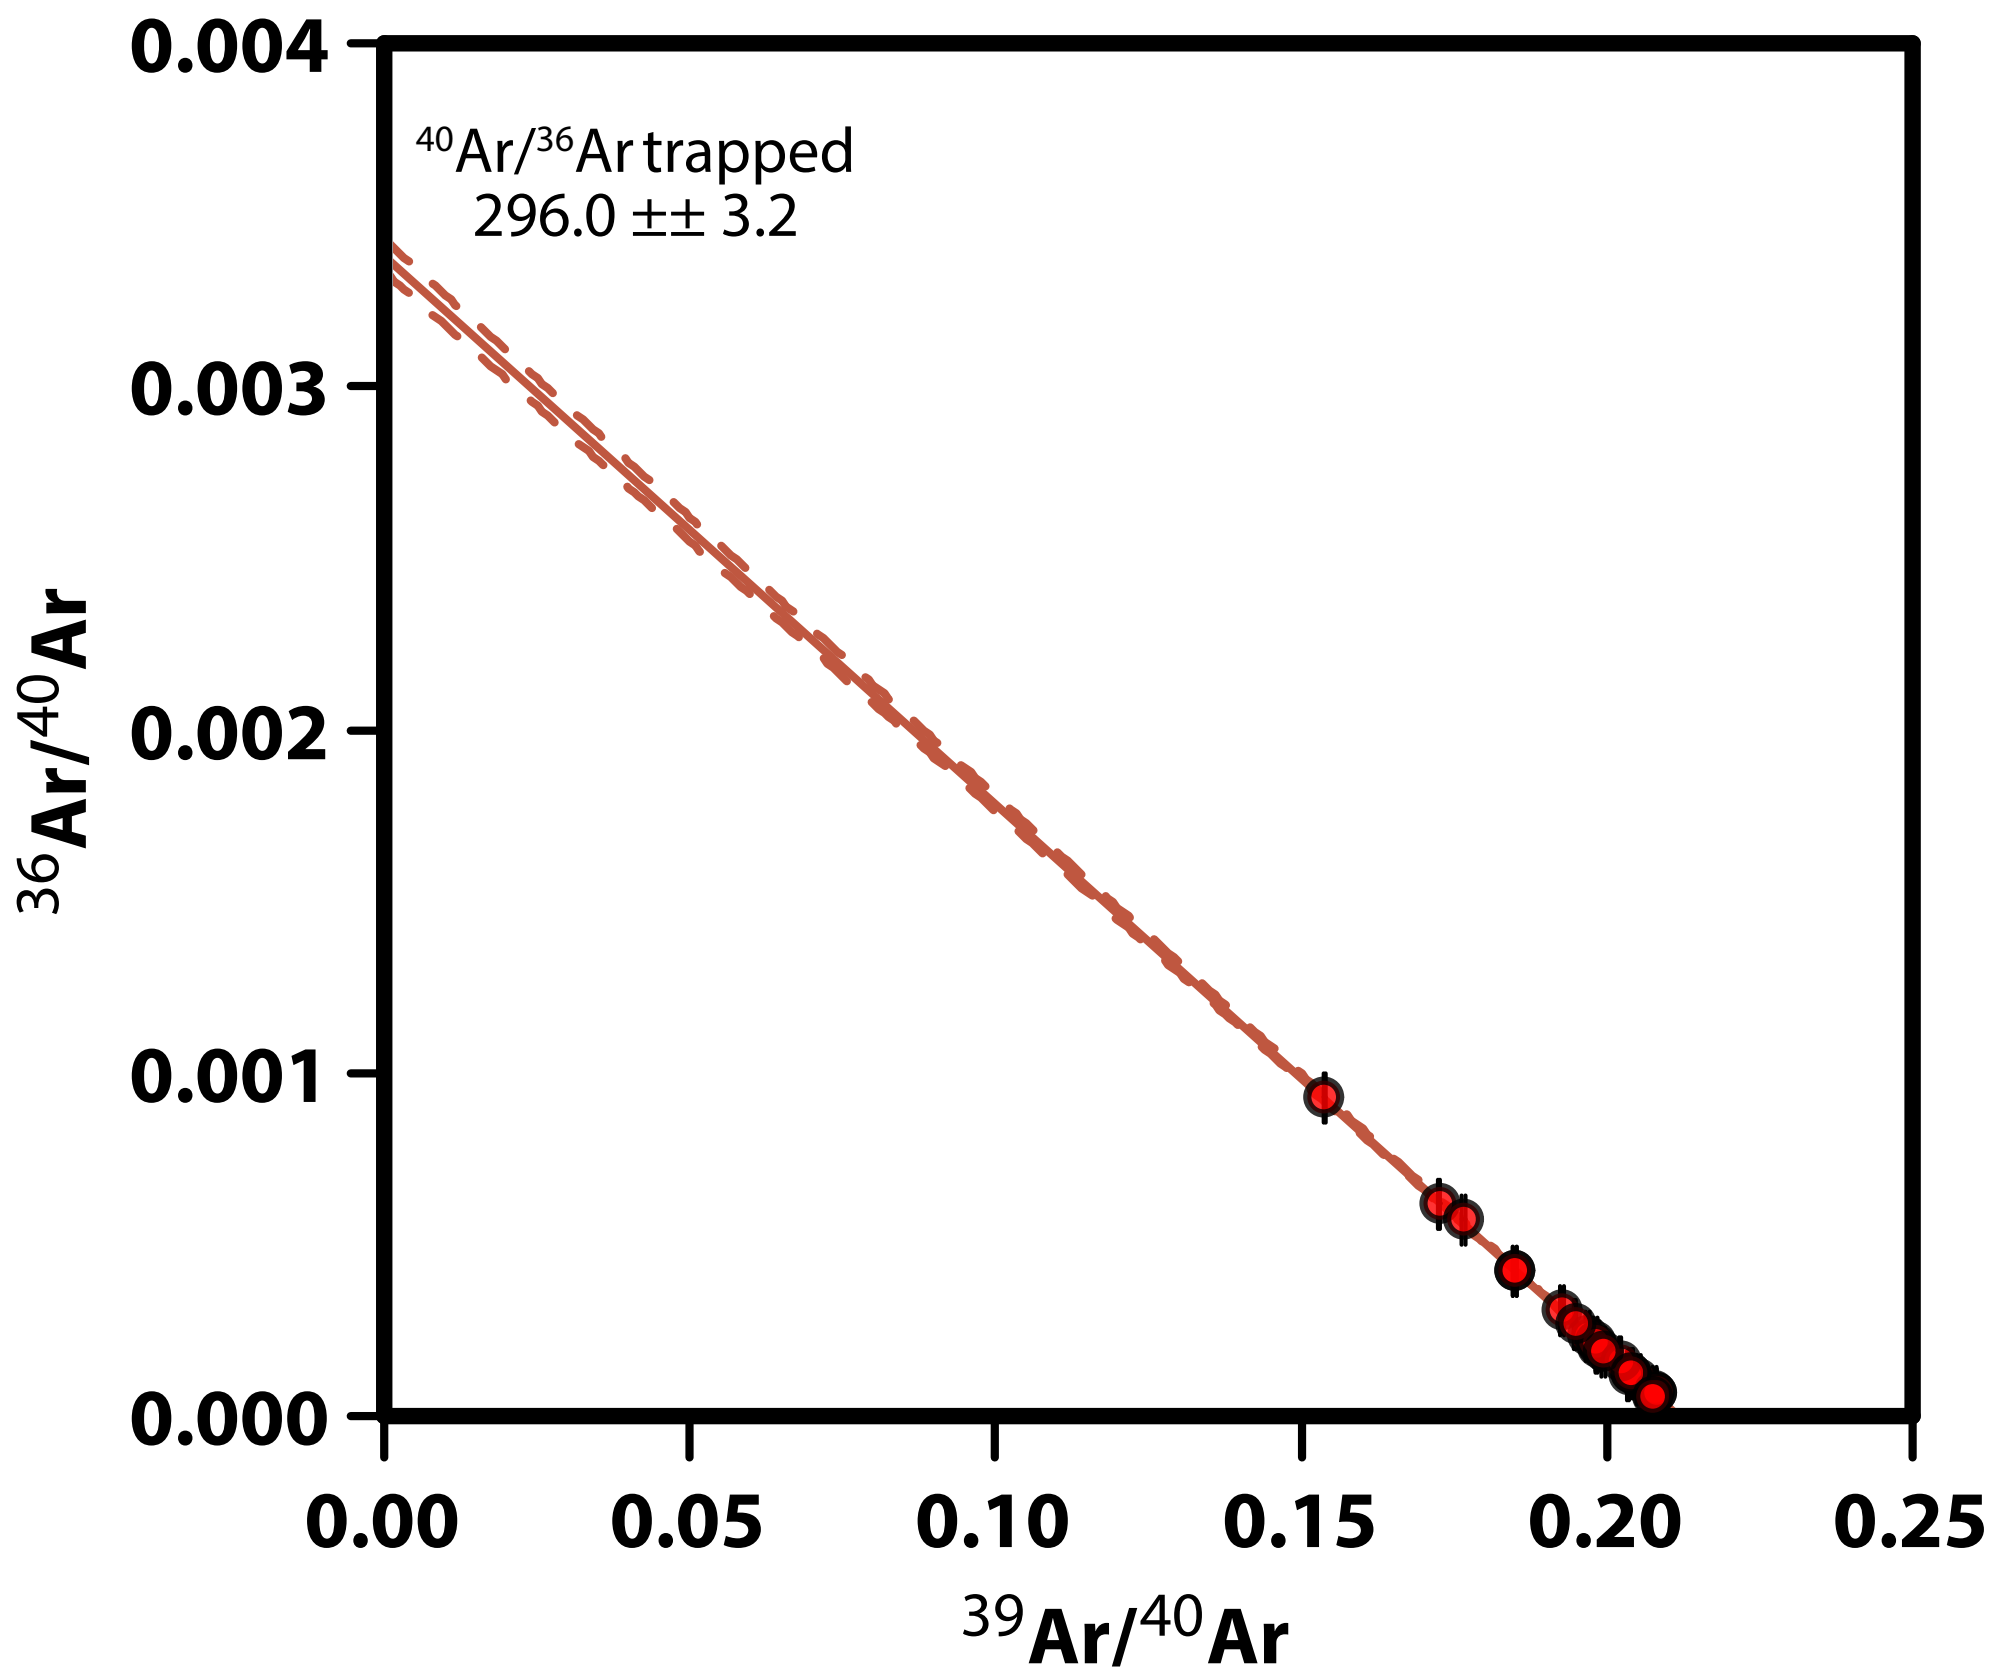

# Tuff of Trout Creek Mtns (TB-439)

$16.401 \pm \pm 0.020$  Ma

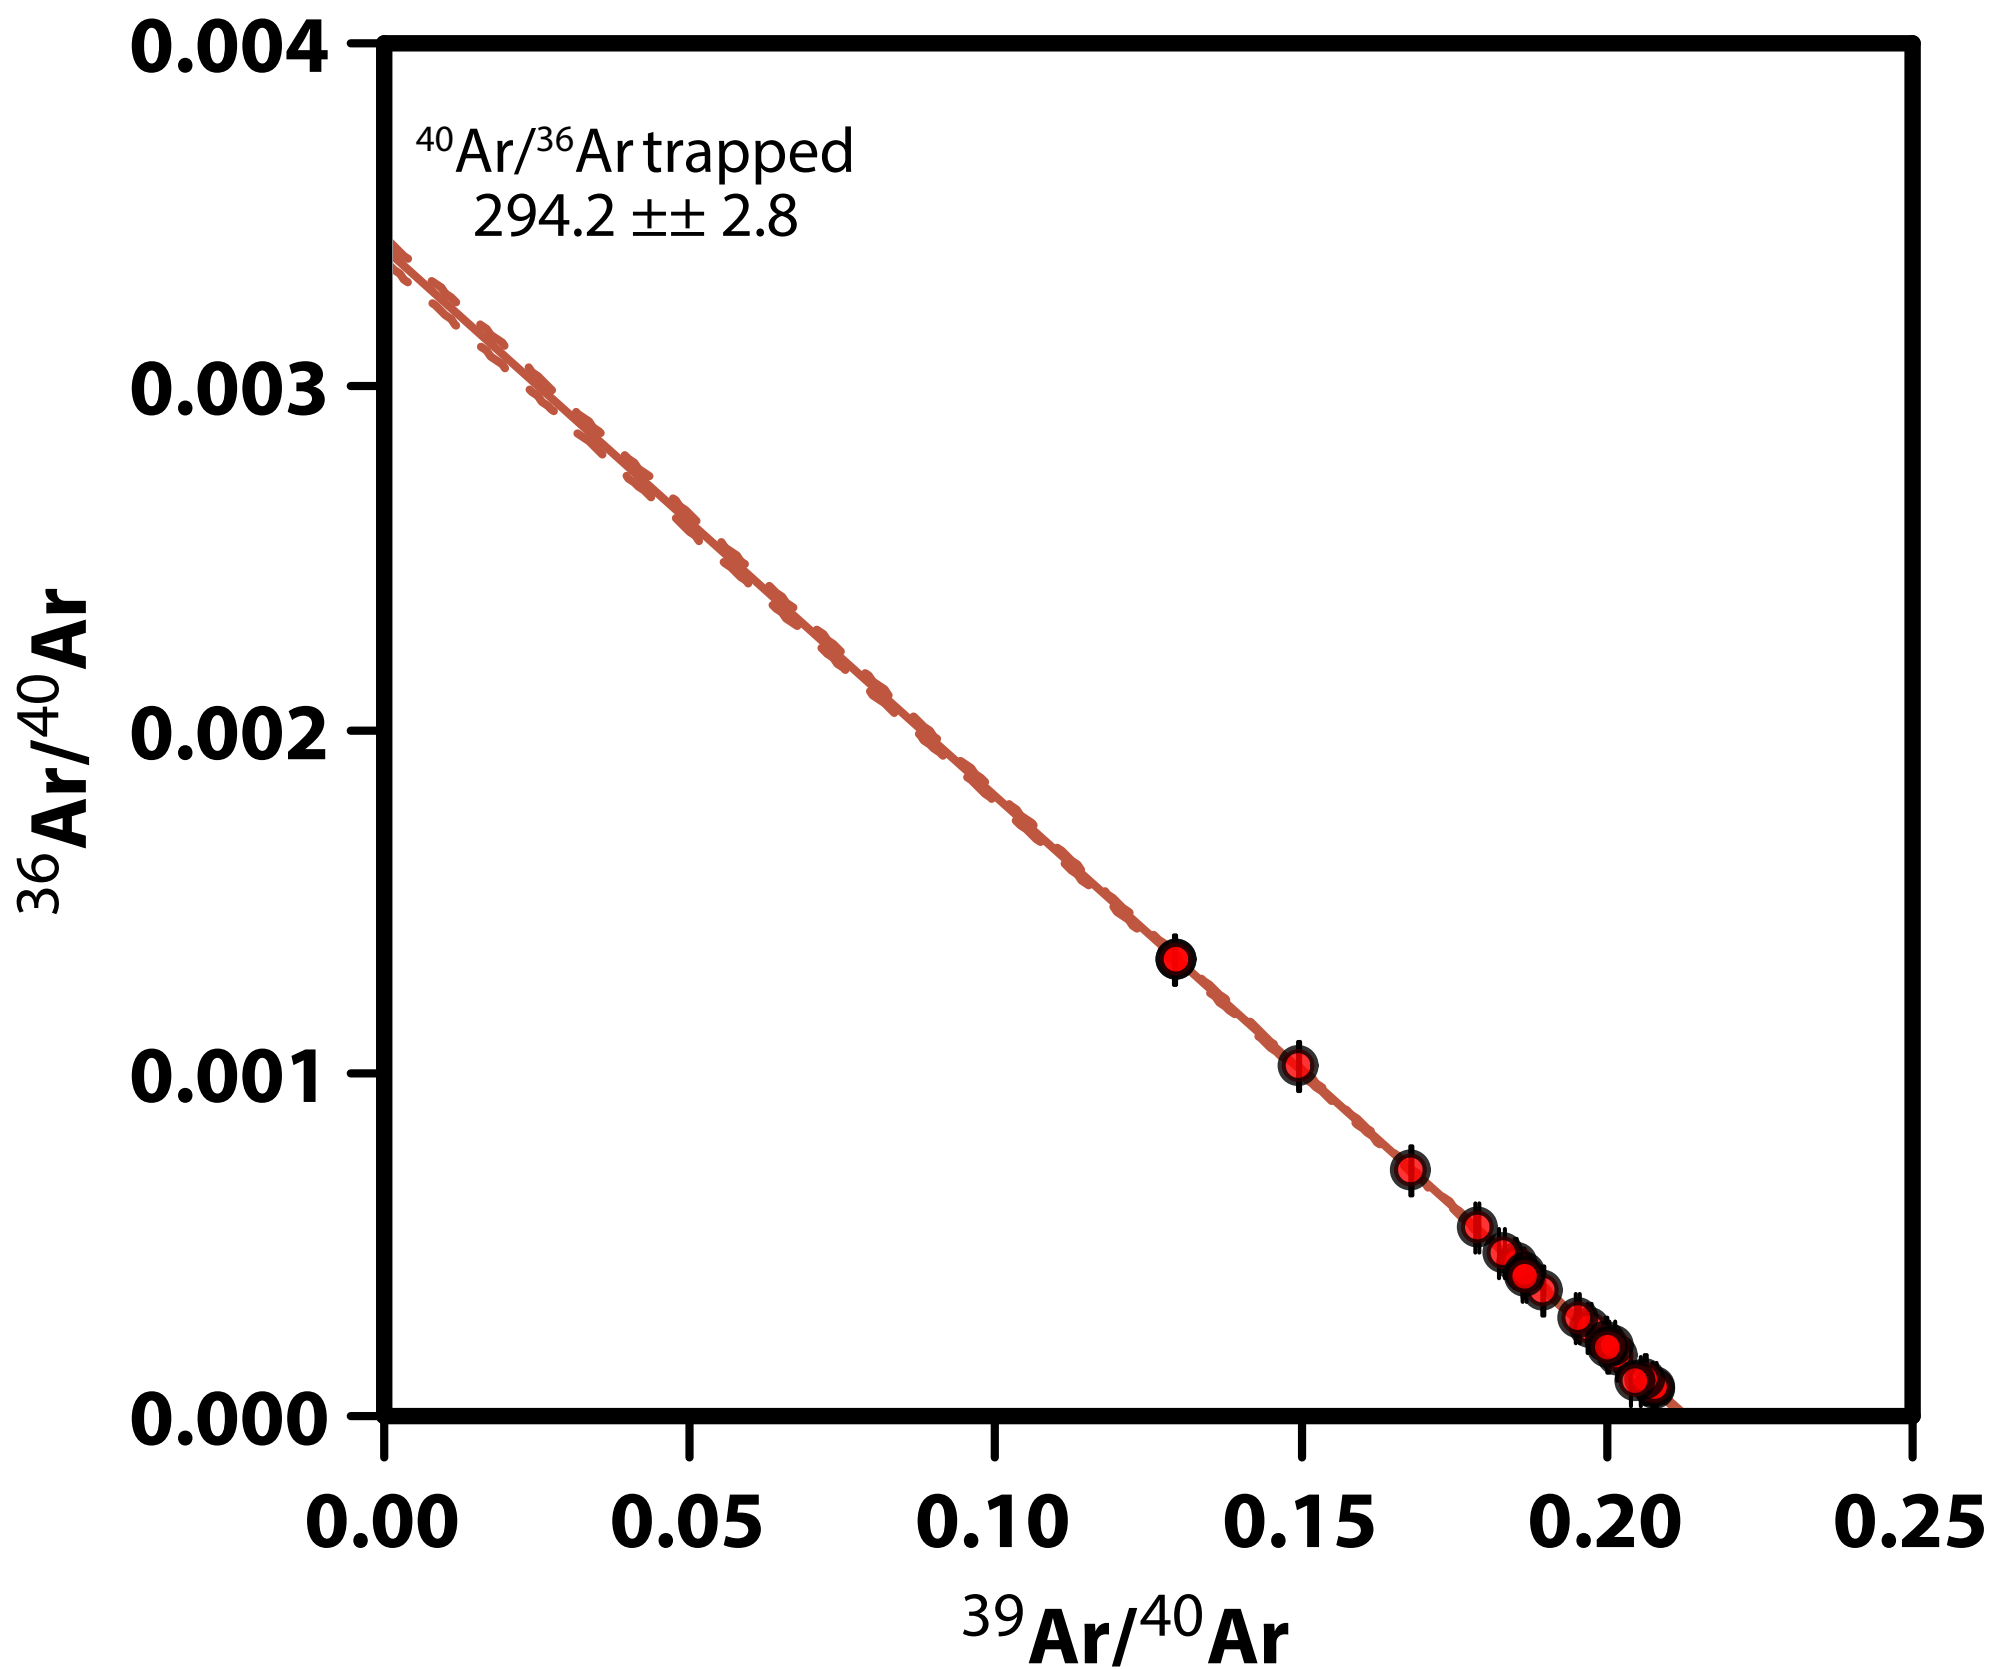

Tuff of Trout Creek Mtns (TB-443)  
16.404  $\pm$  0.015 Ma

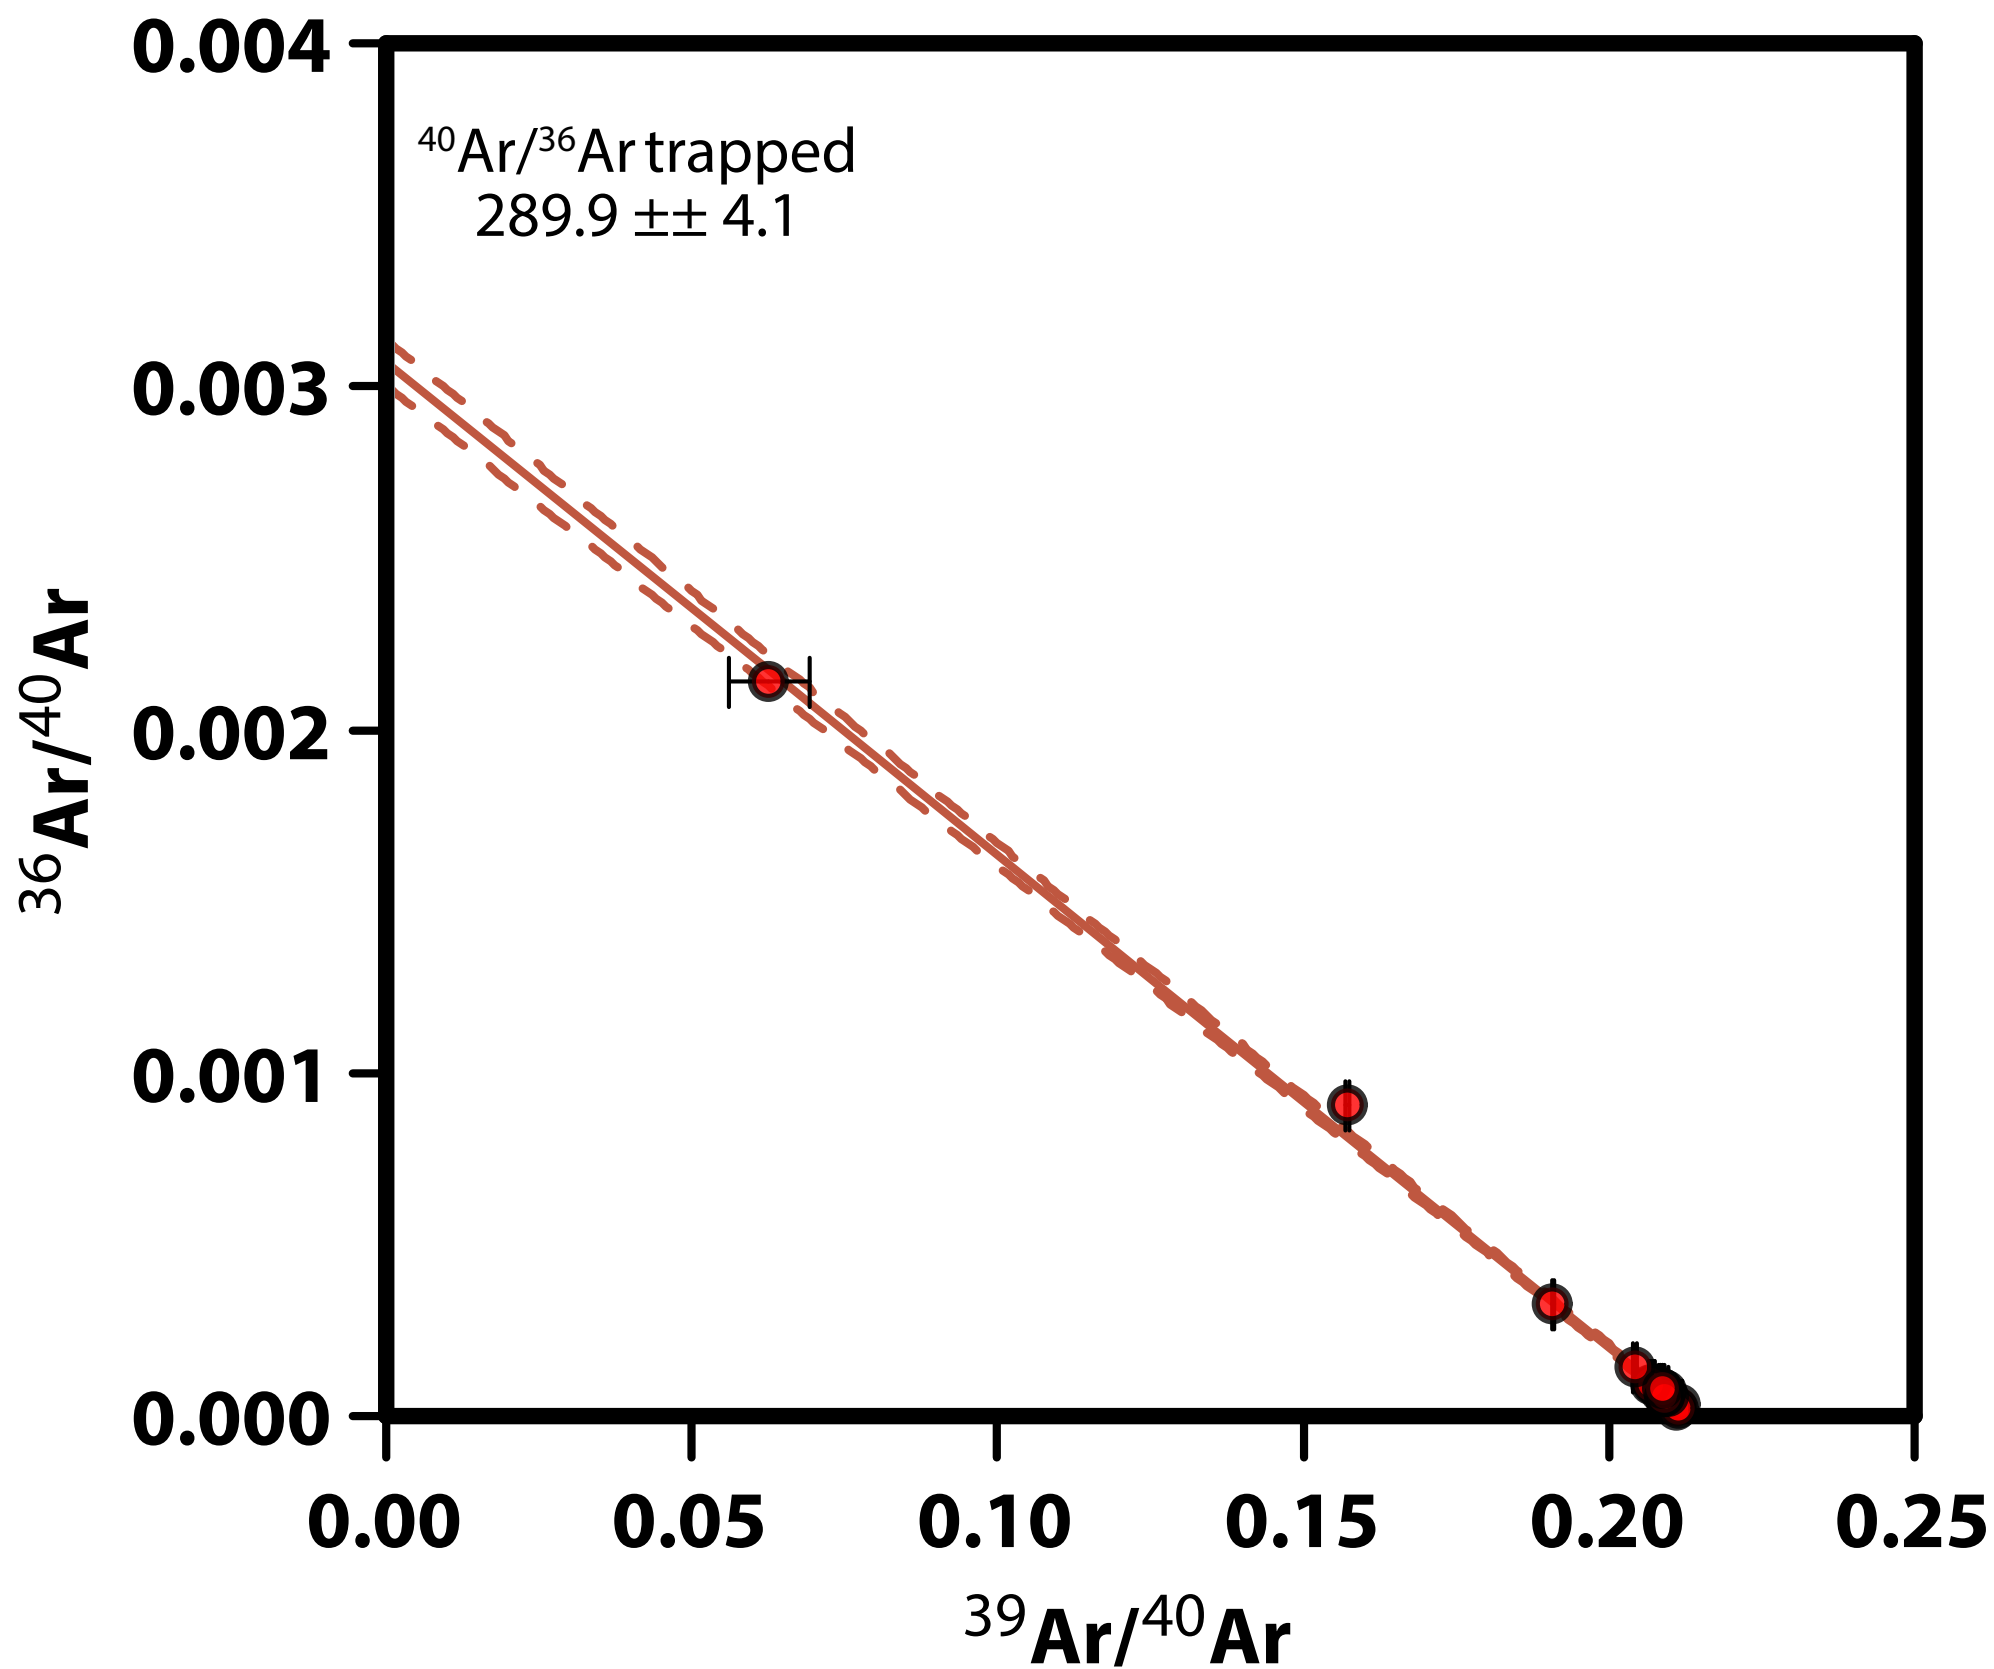

# Tuff of Oregon Canyon (TB-444)

$16.461 \pm \pm 0.015$  Ma

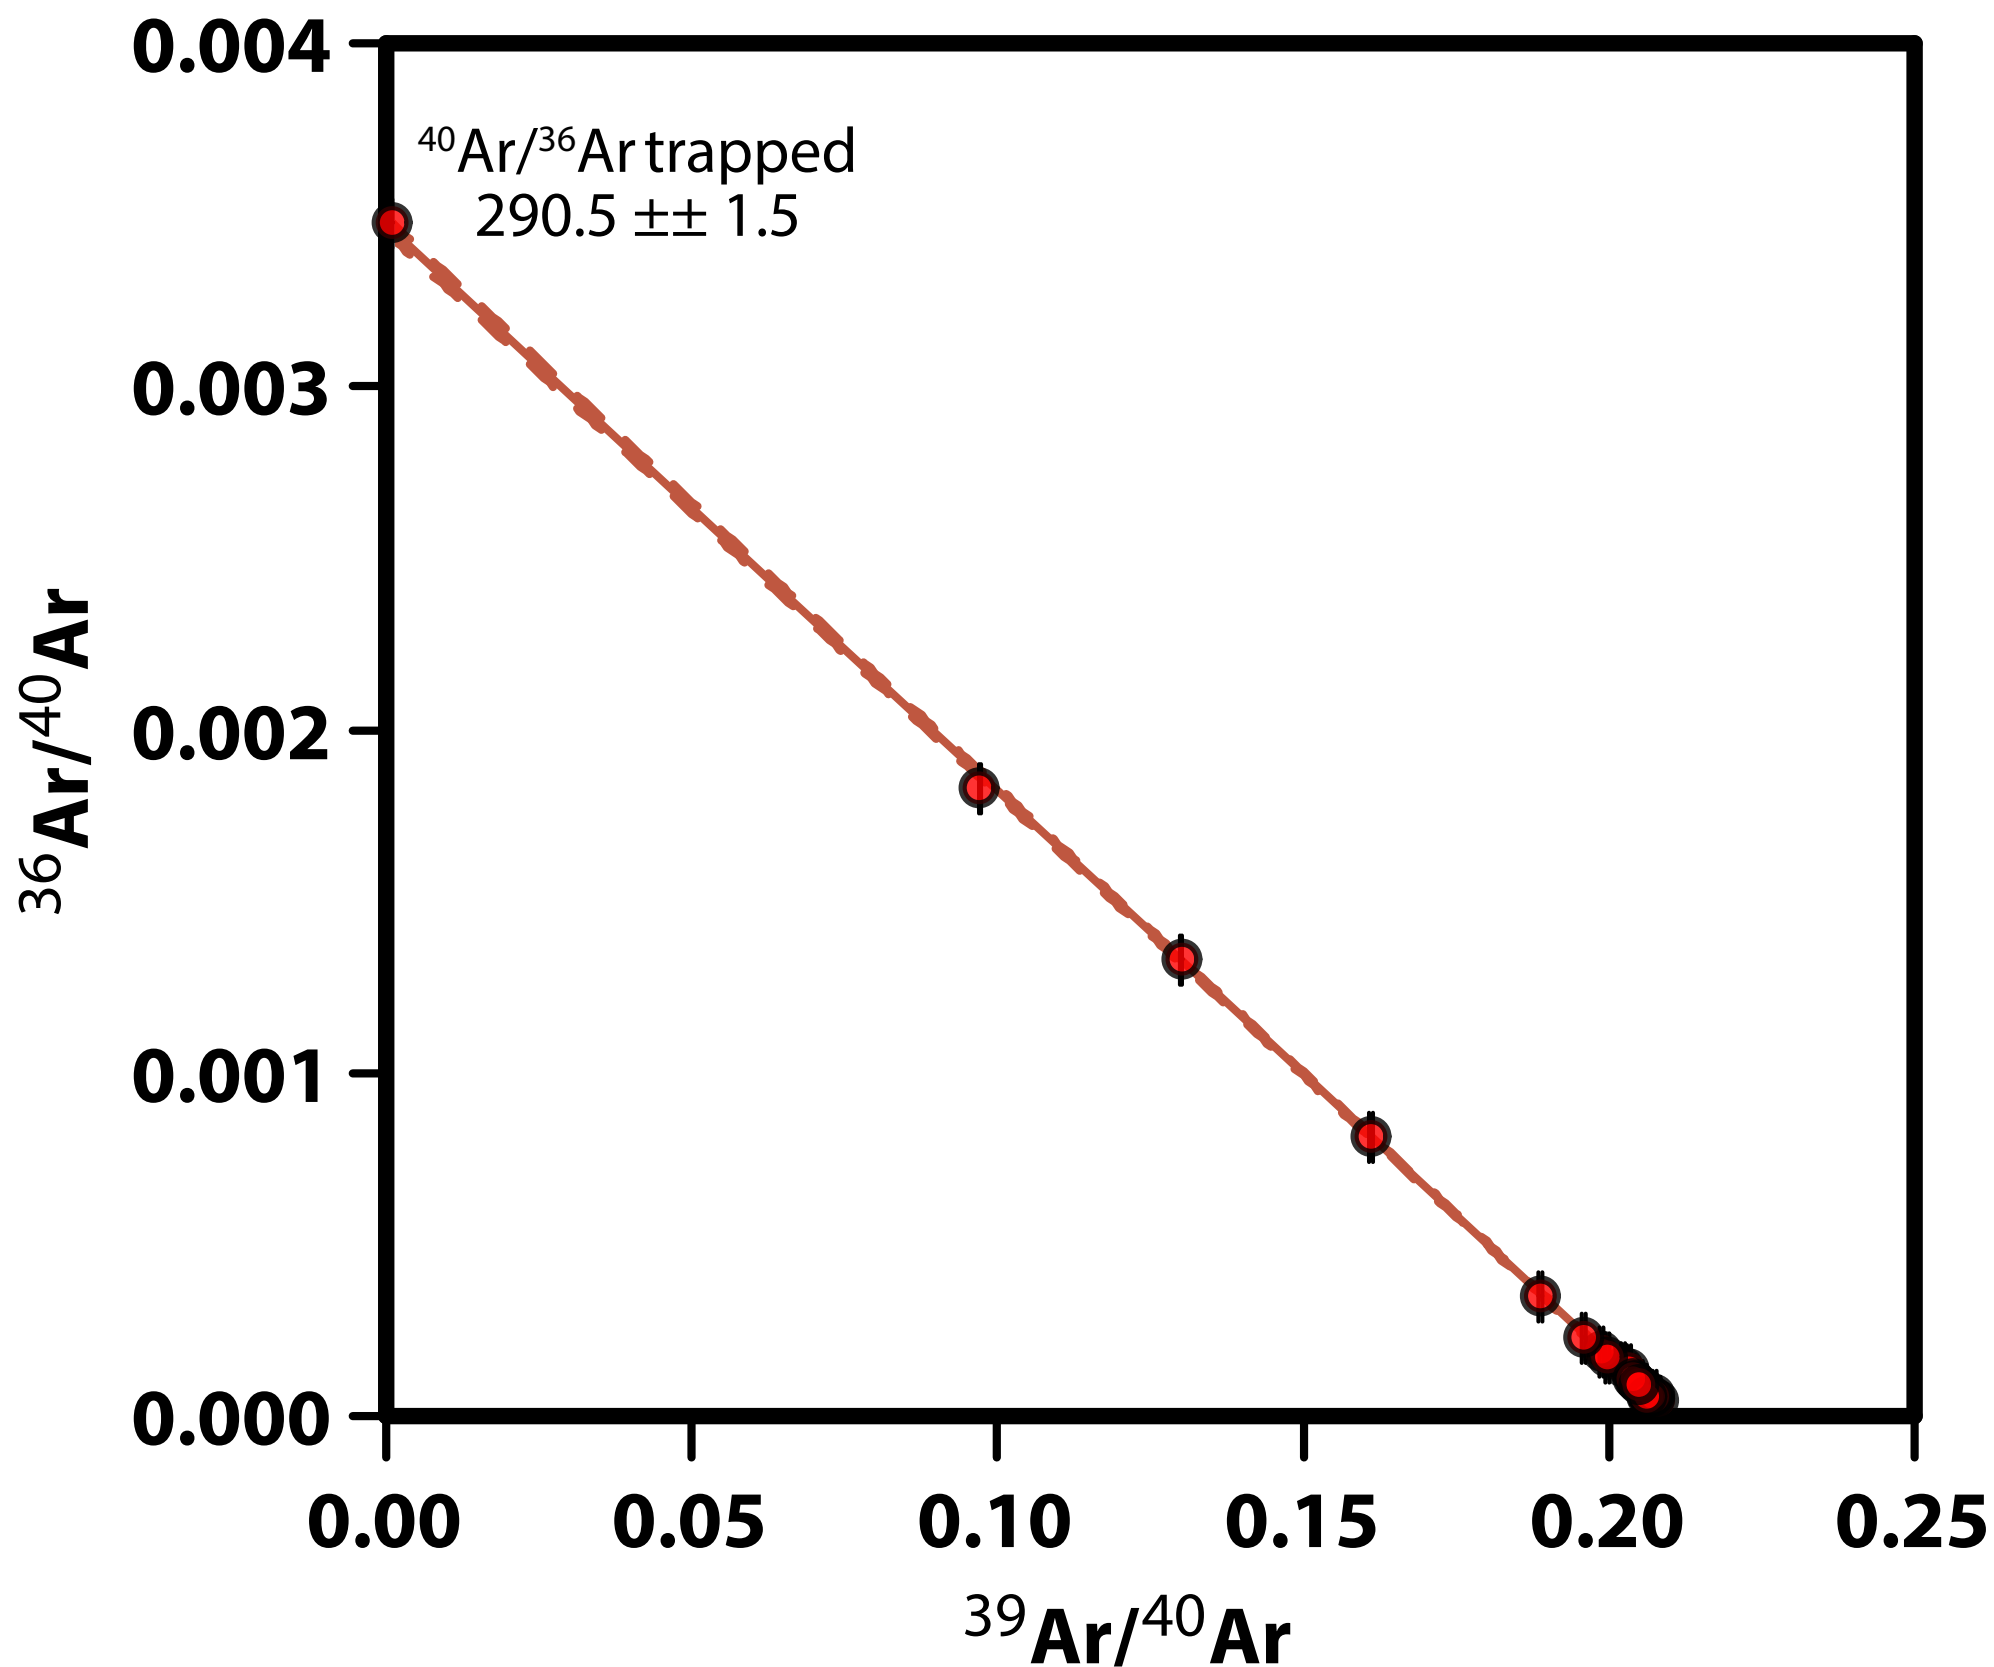

Tuff of Trout Creek Mtns (TB-451)  
16.431  $\pm$  0.015 Ma

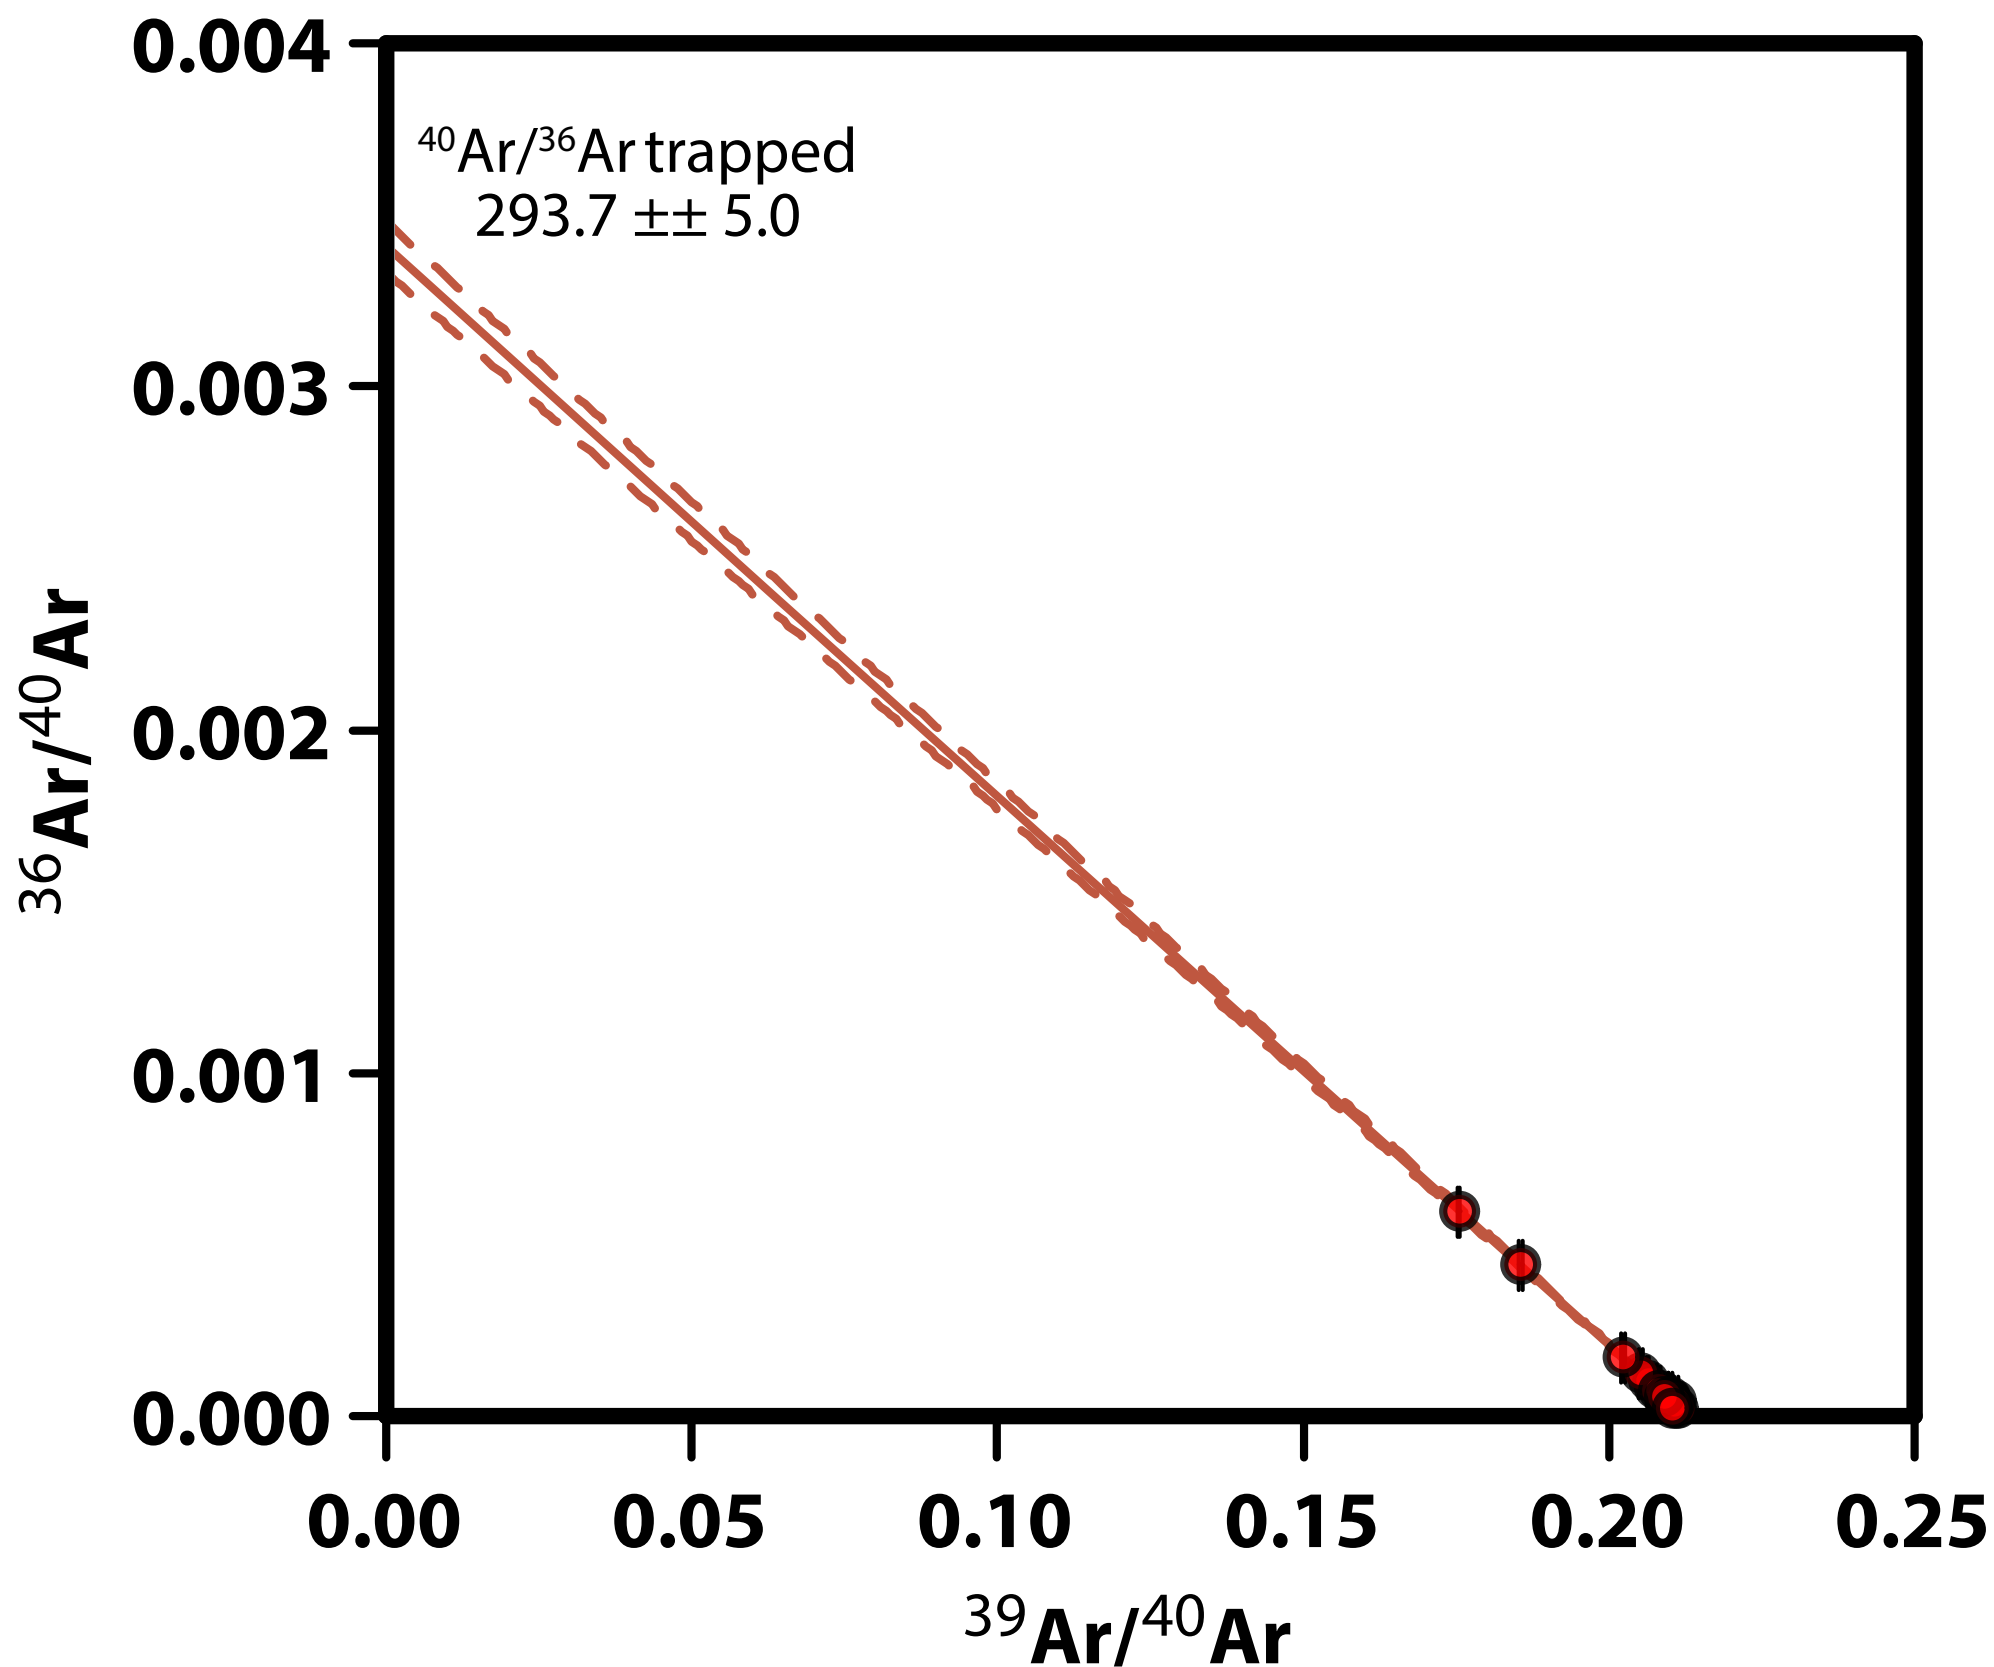

# Tuff of Long Ridge (TB-452)

$16.343 \pm \pm 0.026$  Ma

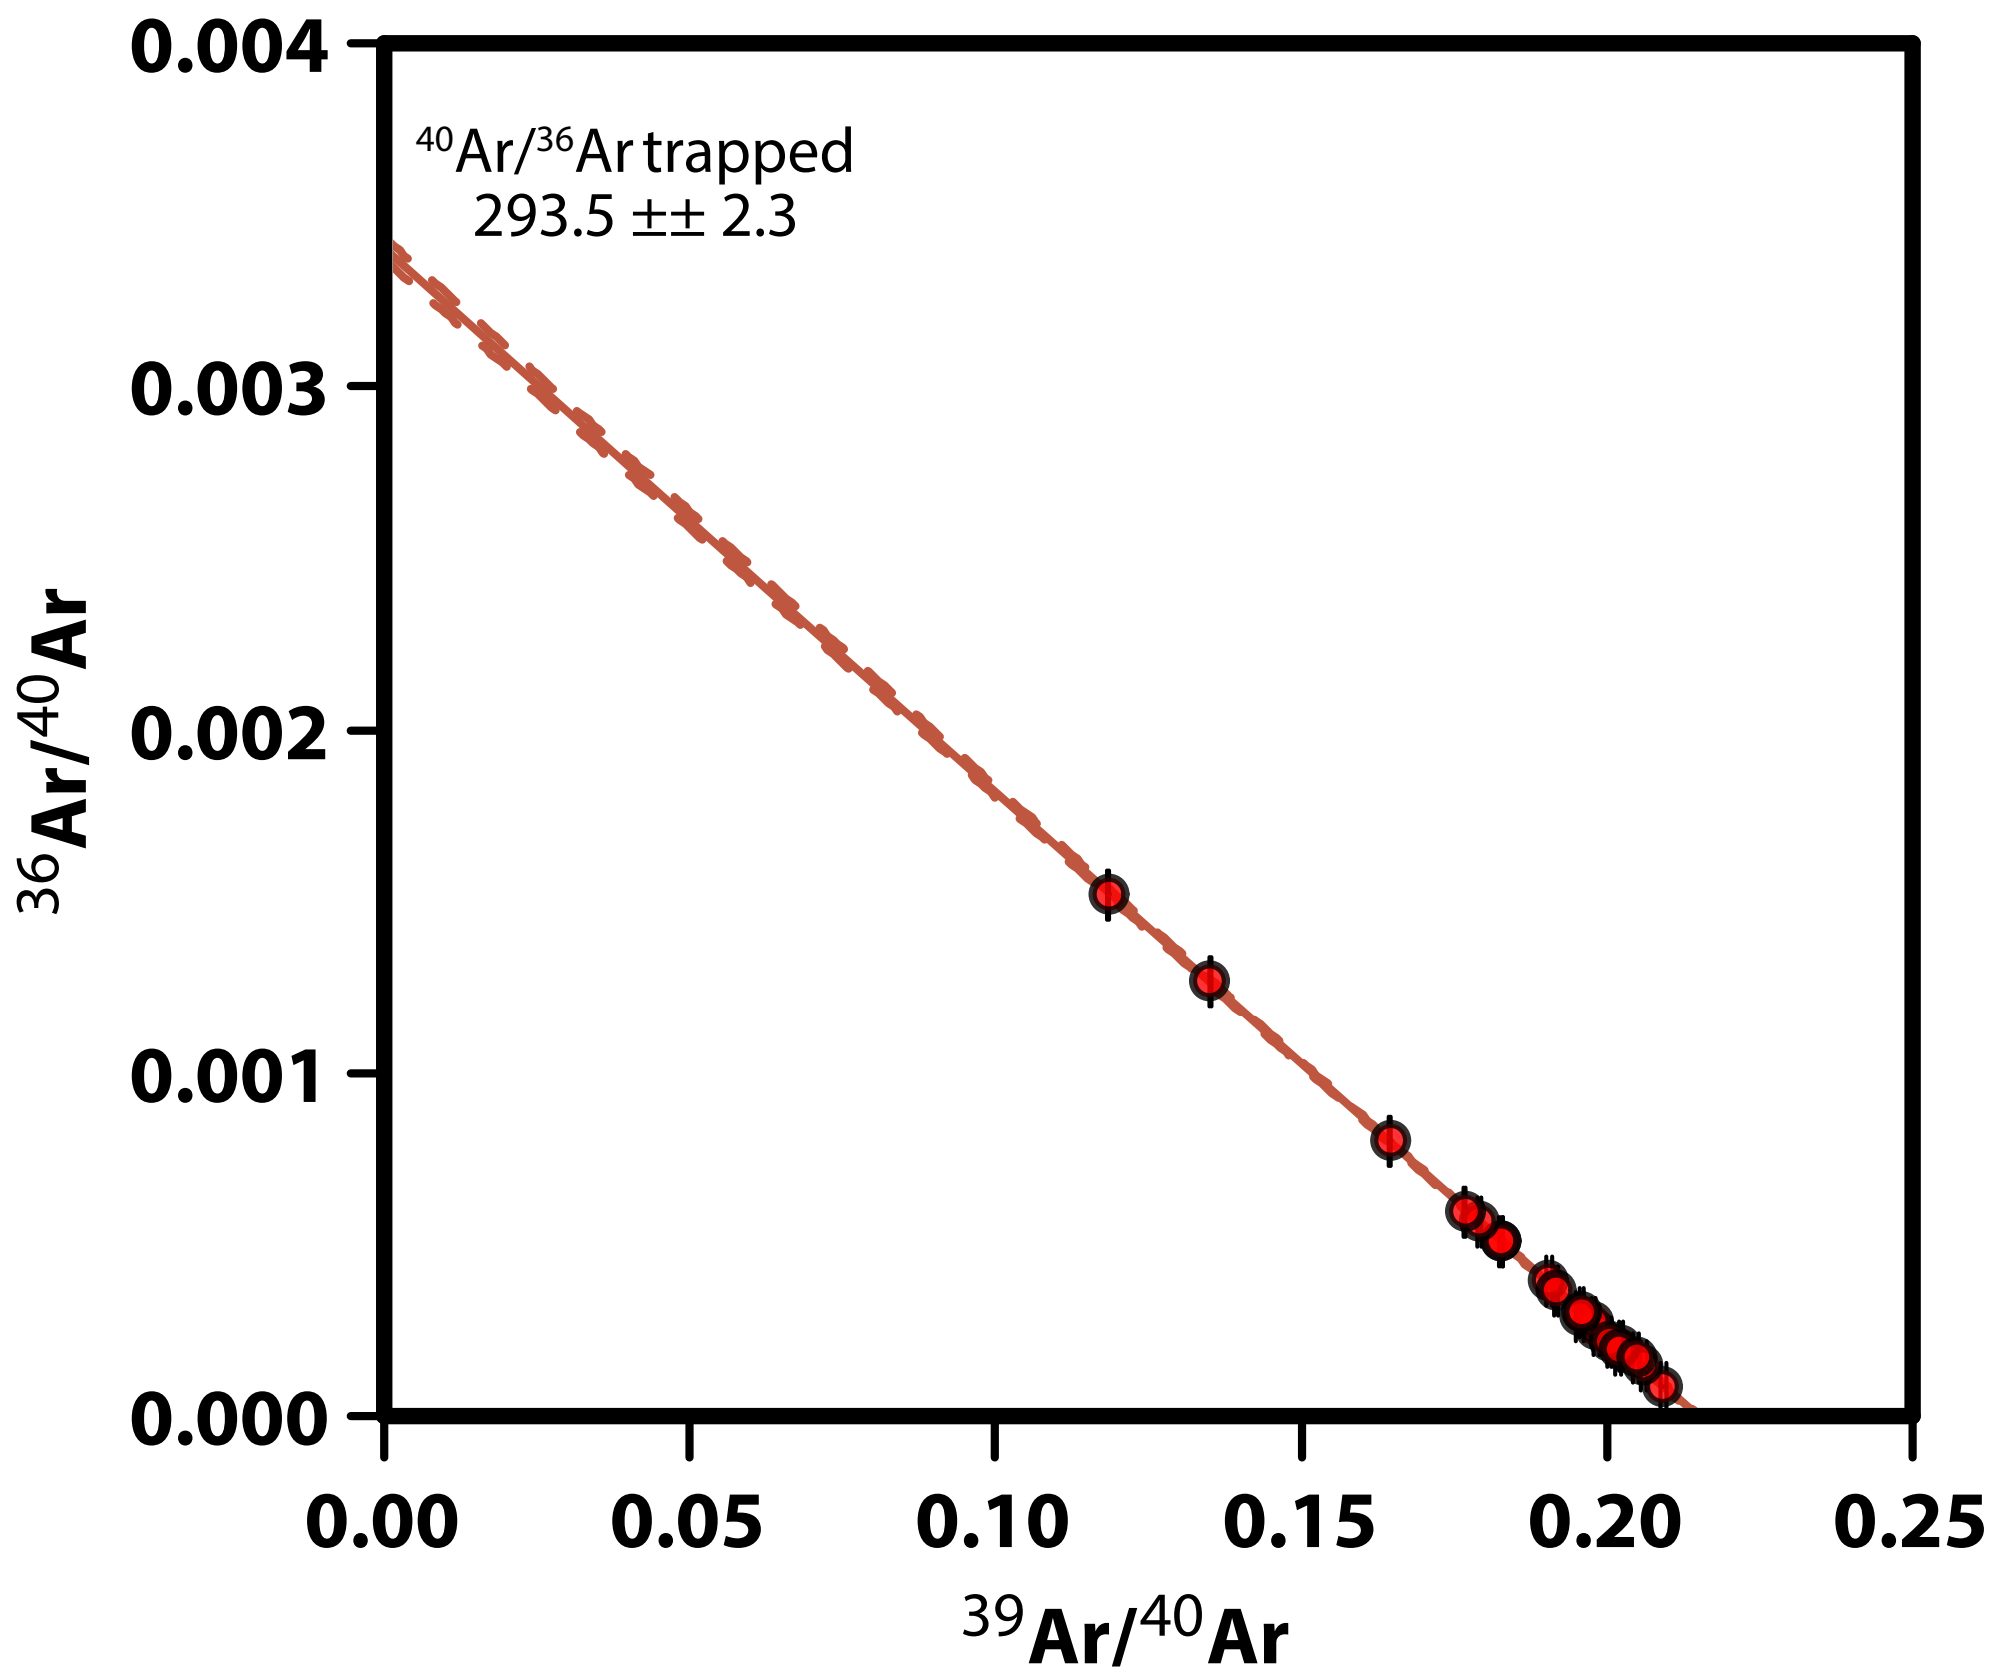

# Tuff of Long Ridge (TB-455)

$16.328 \pm \pm 0.031$  Ma

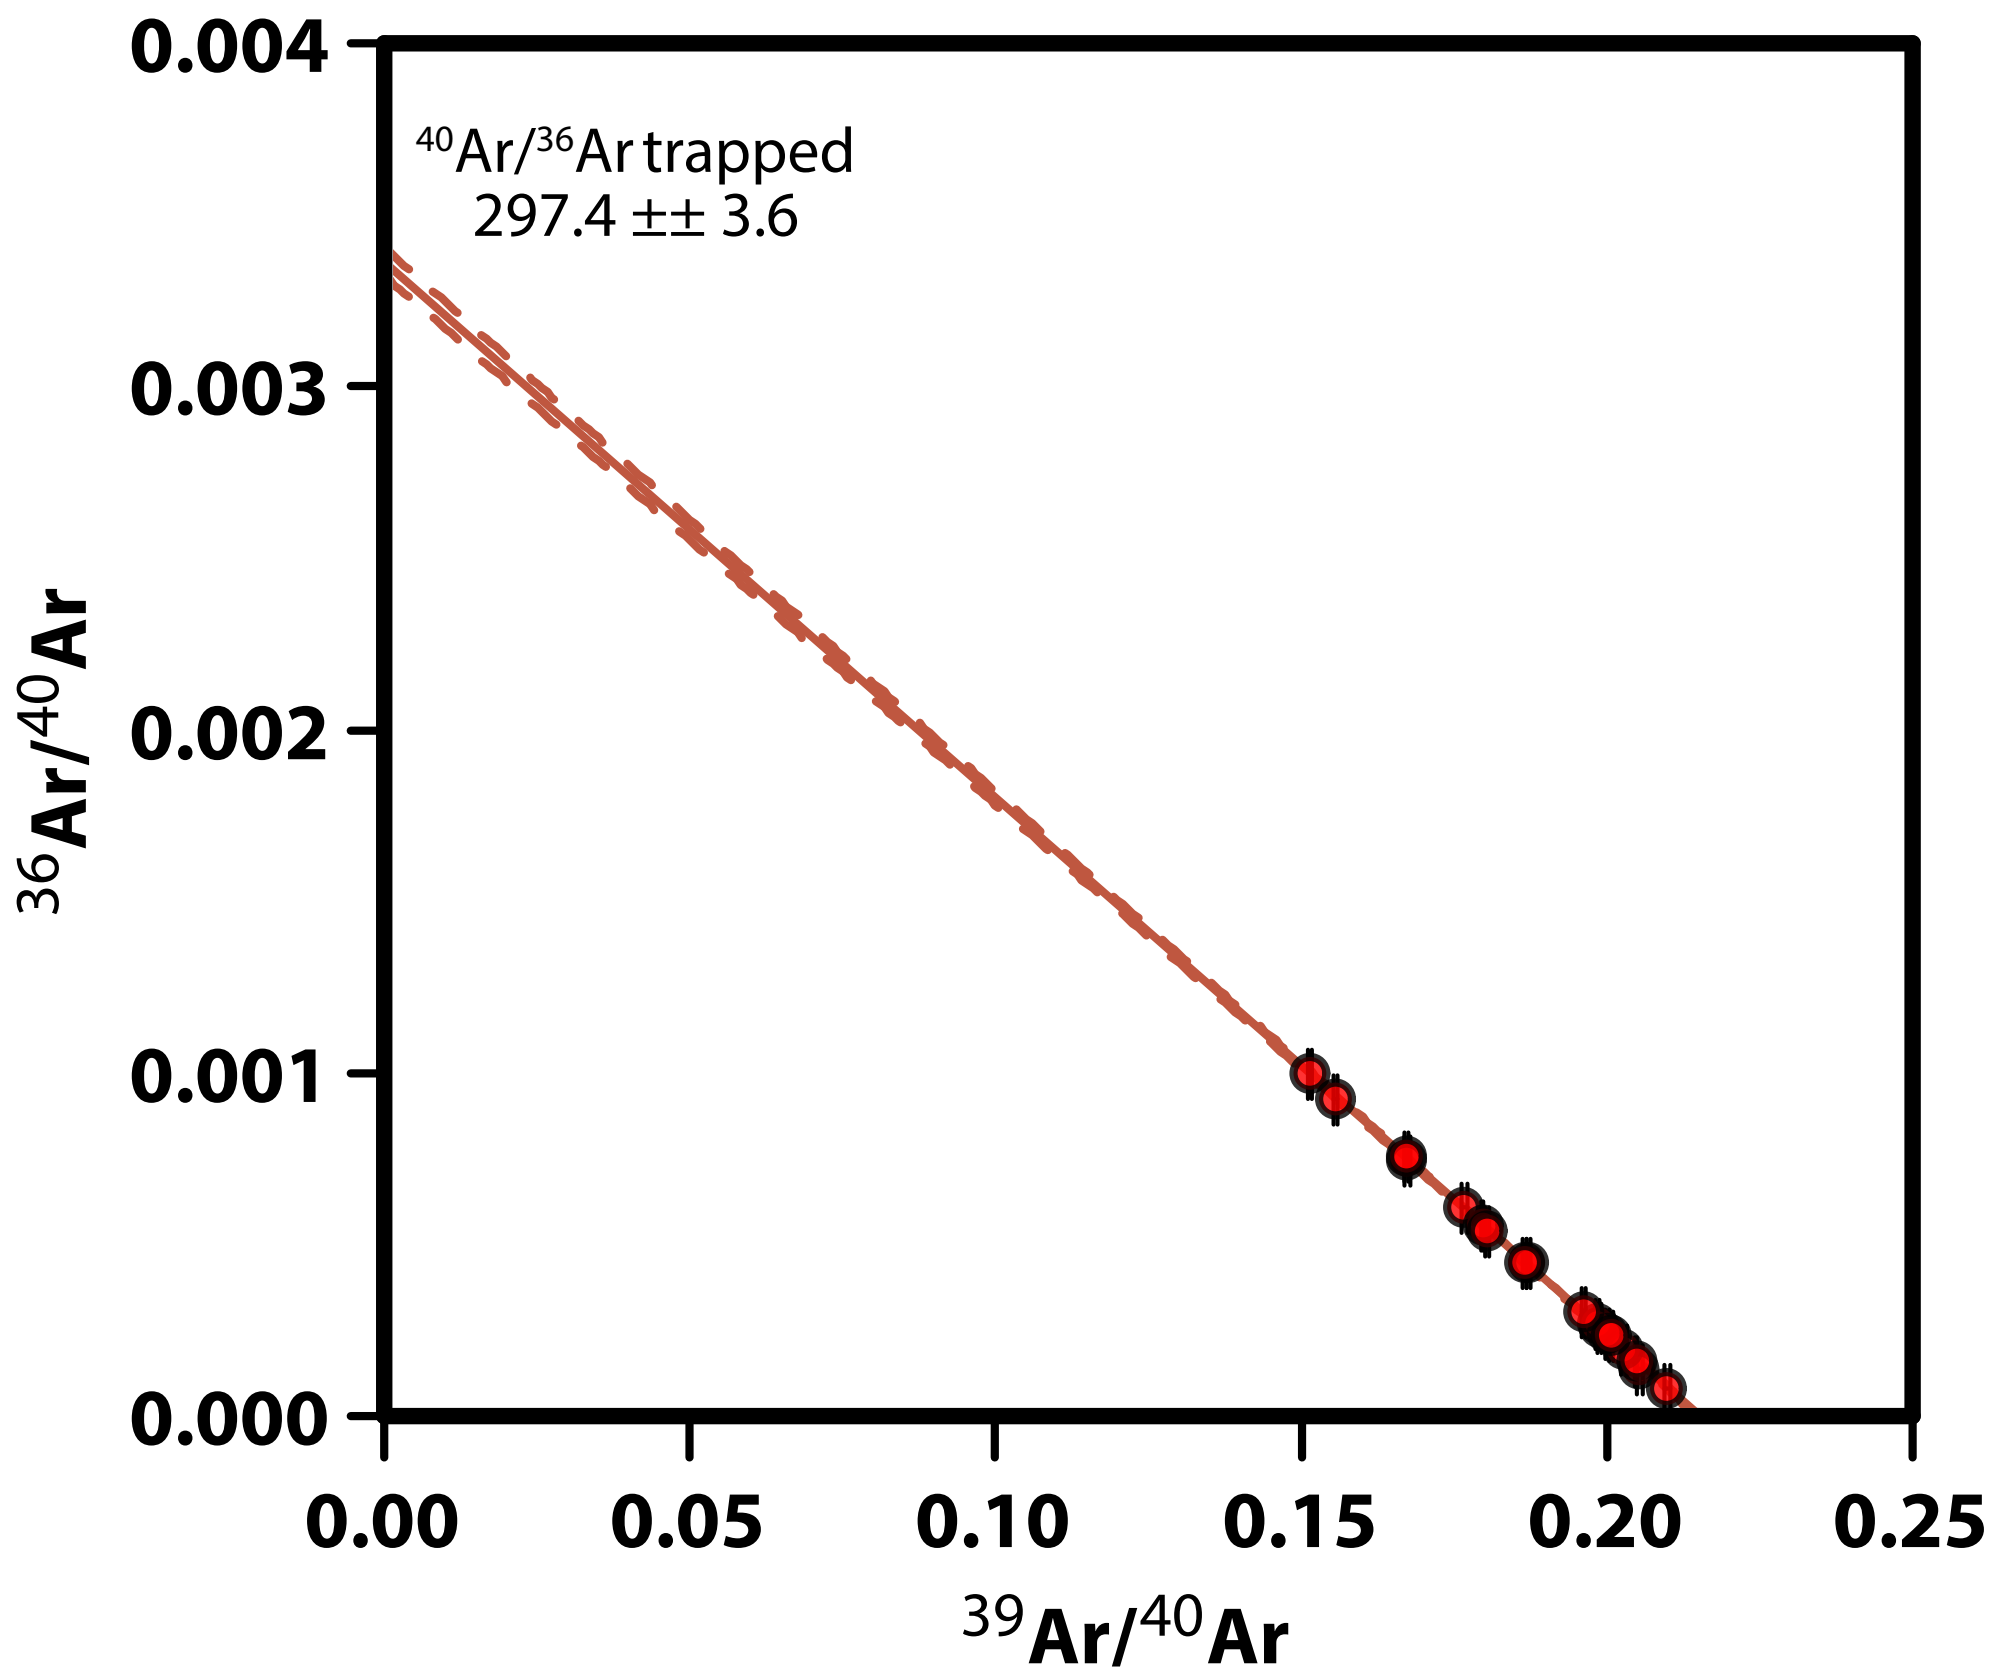

Tuff of Trout Creek Mtns (TB-456)  
16.415  $\pm$  0.020 Ma

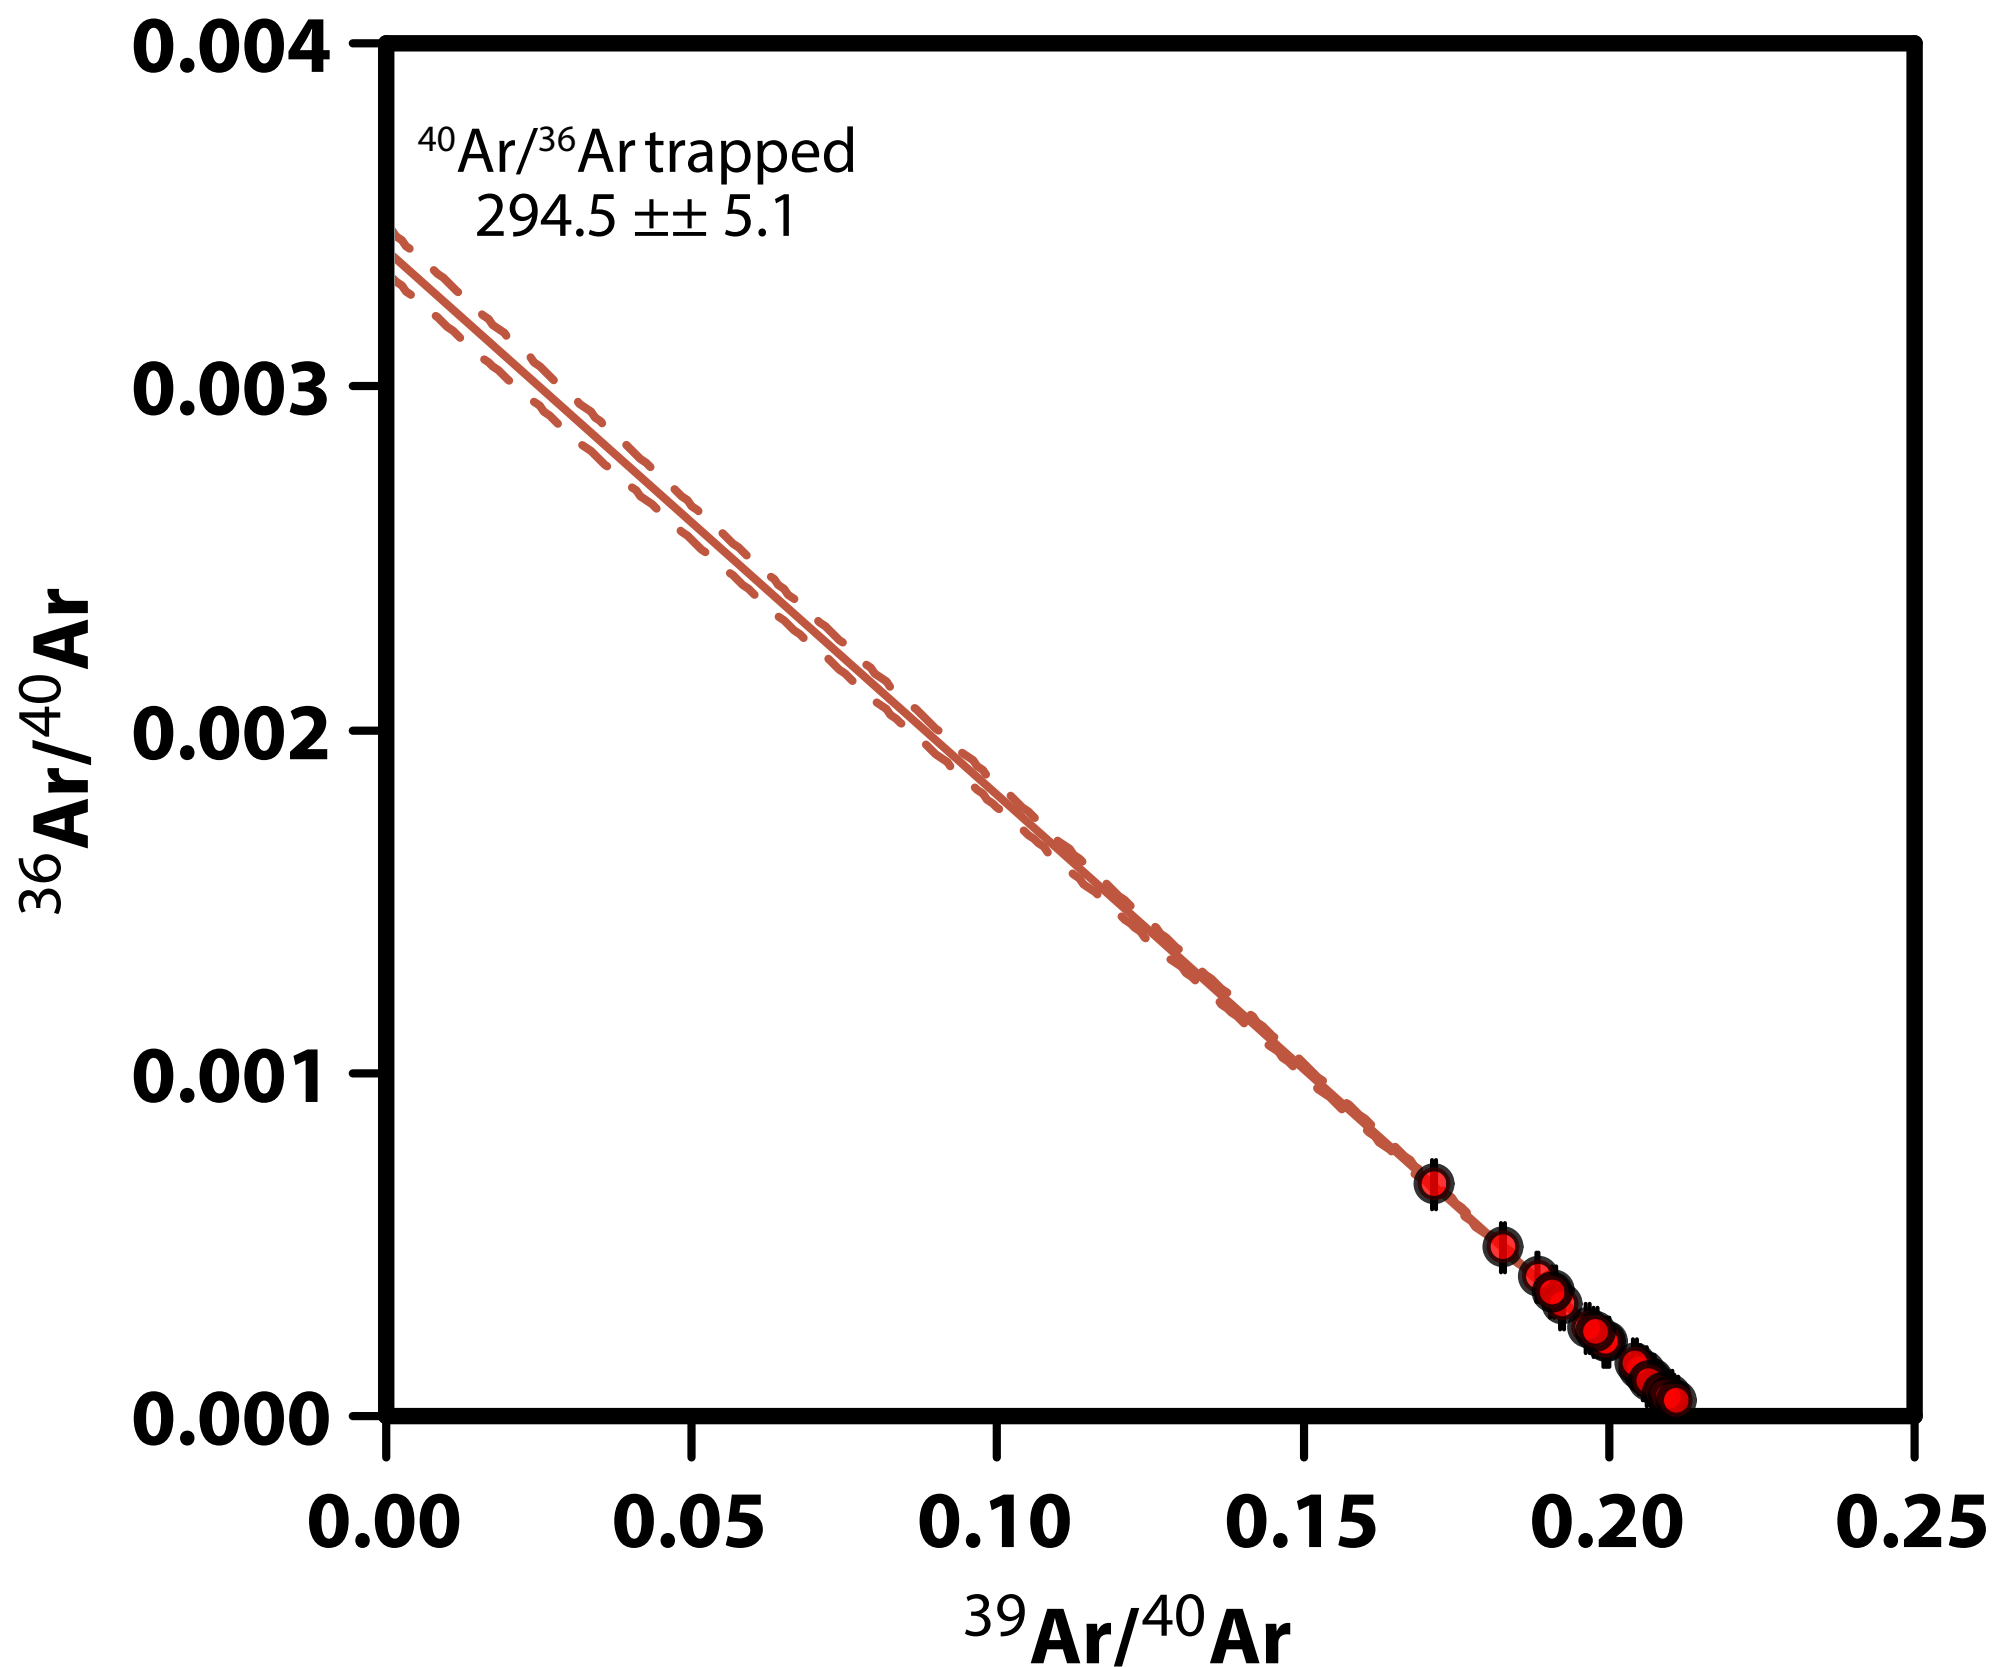



# S. Flagstaff Ranch rhyolite lava (TB-468)

$15.544 \pm \pm 0.030$  Ma

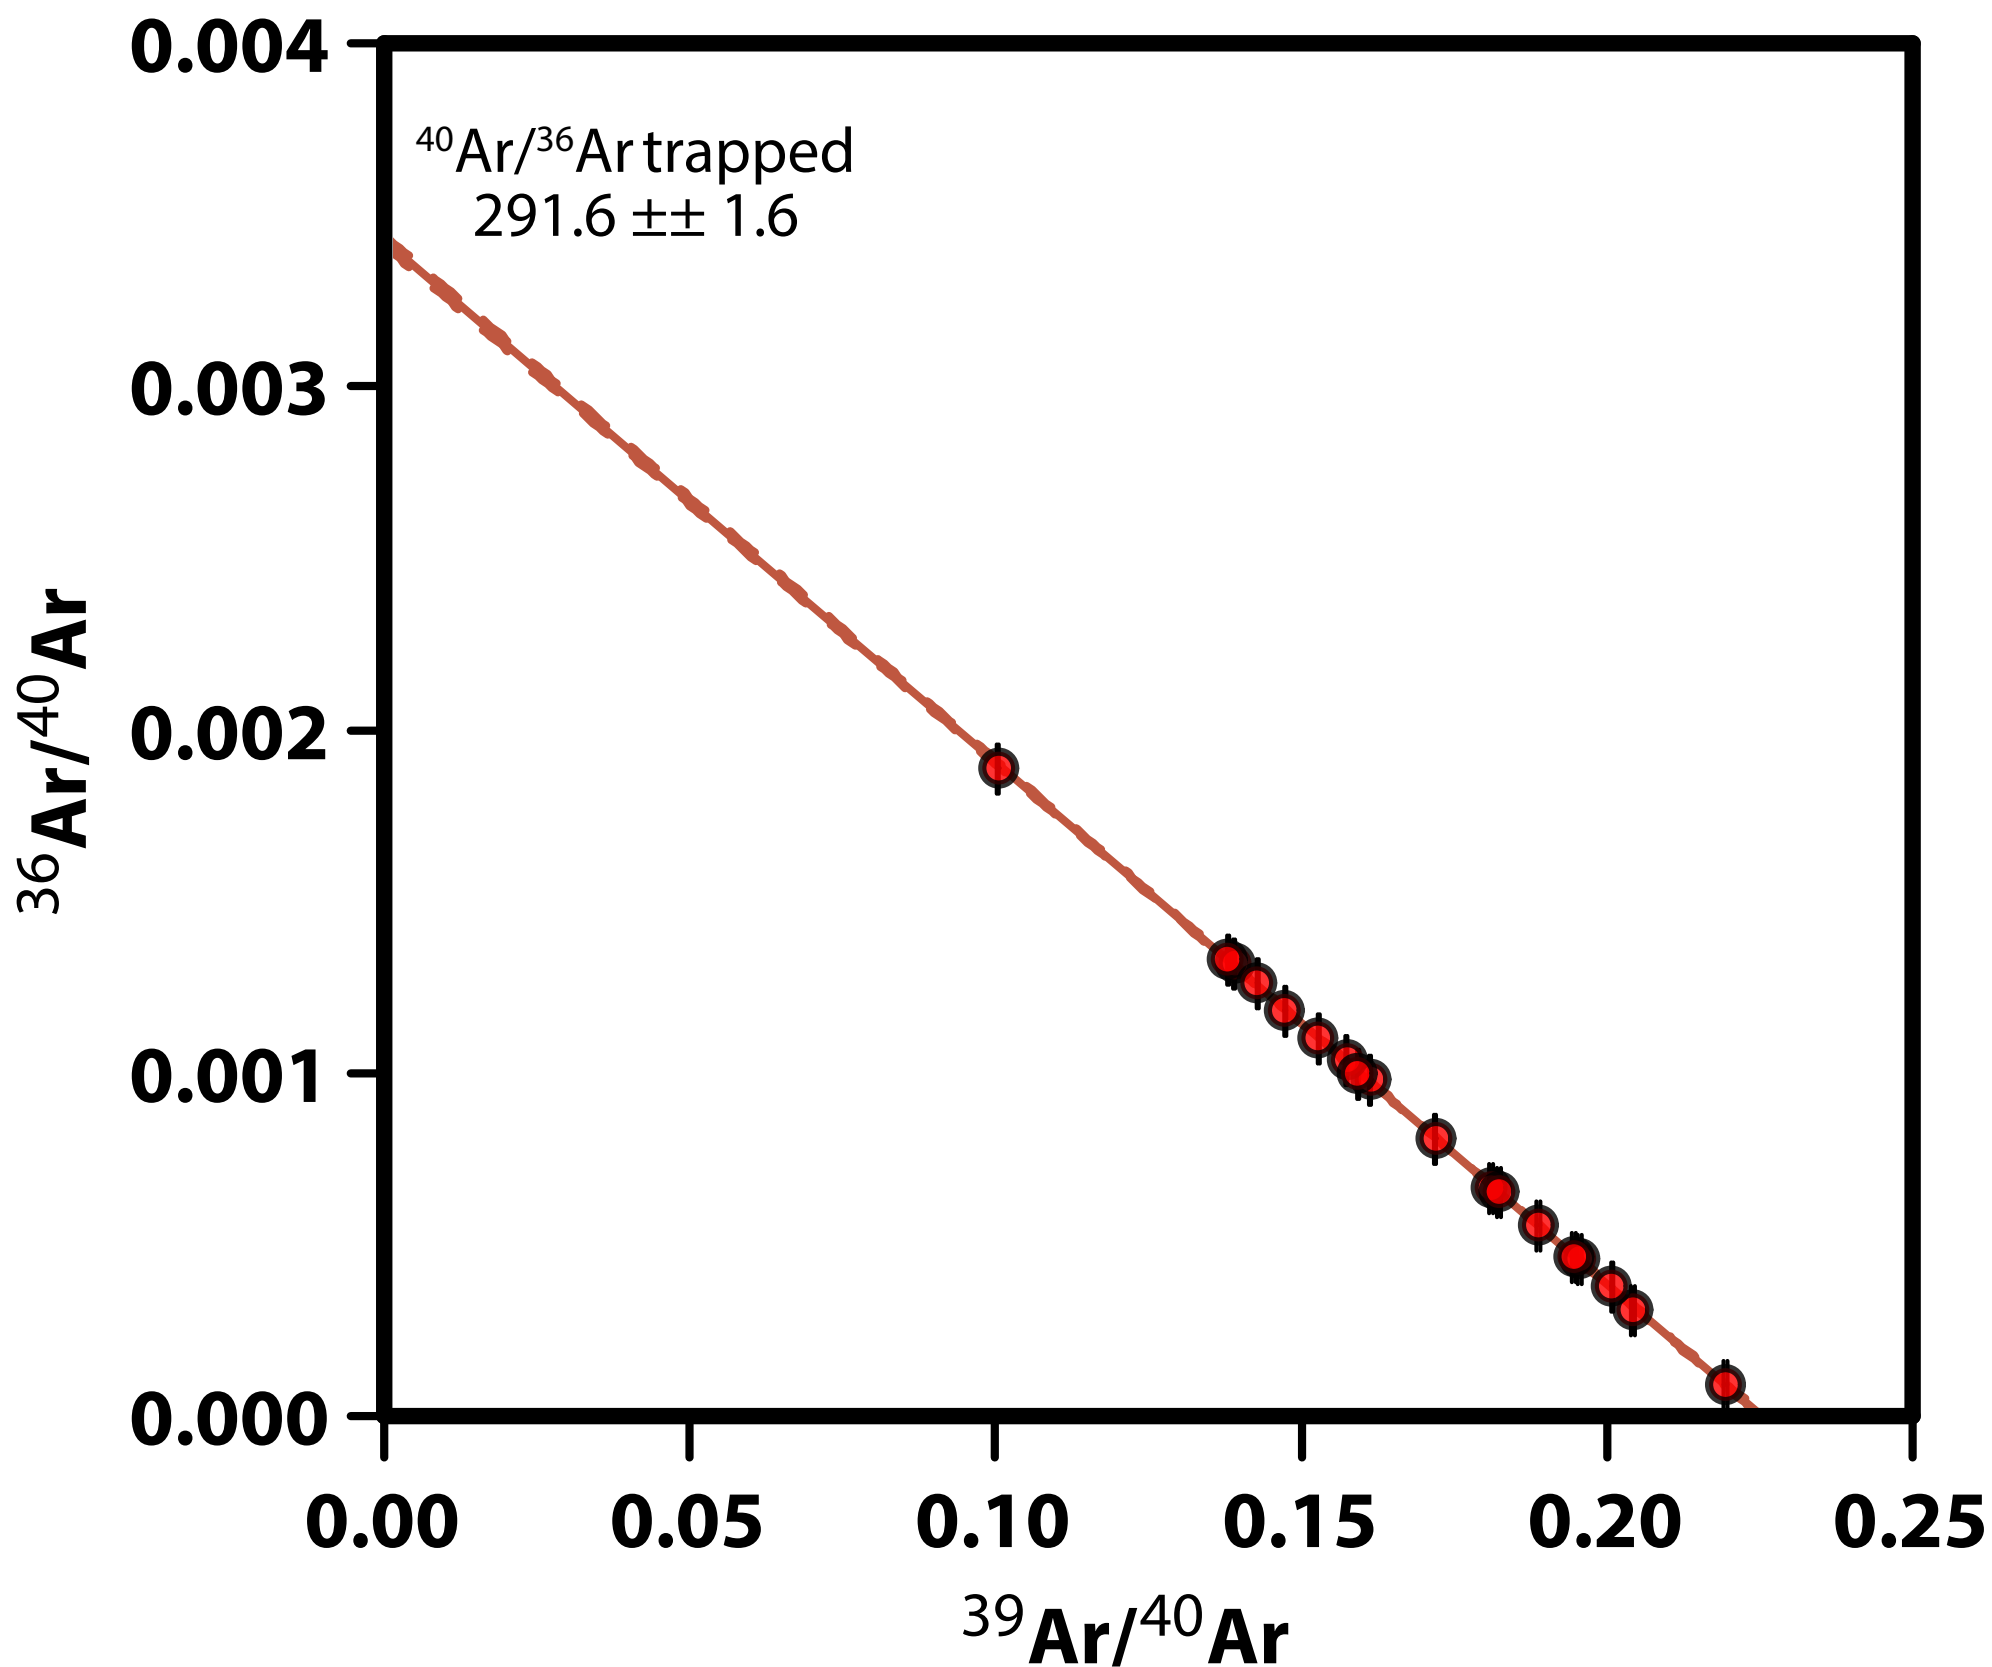

# Bearclaw rhyolite lava (TB-469)

$15.555 \pm \pm 0.021$  Ma

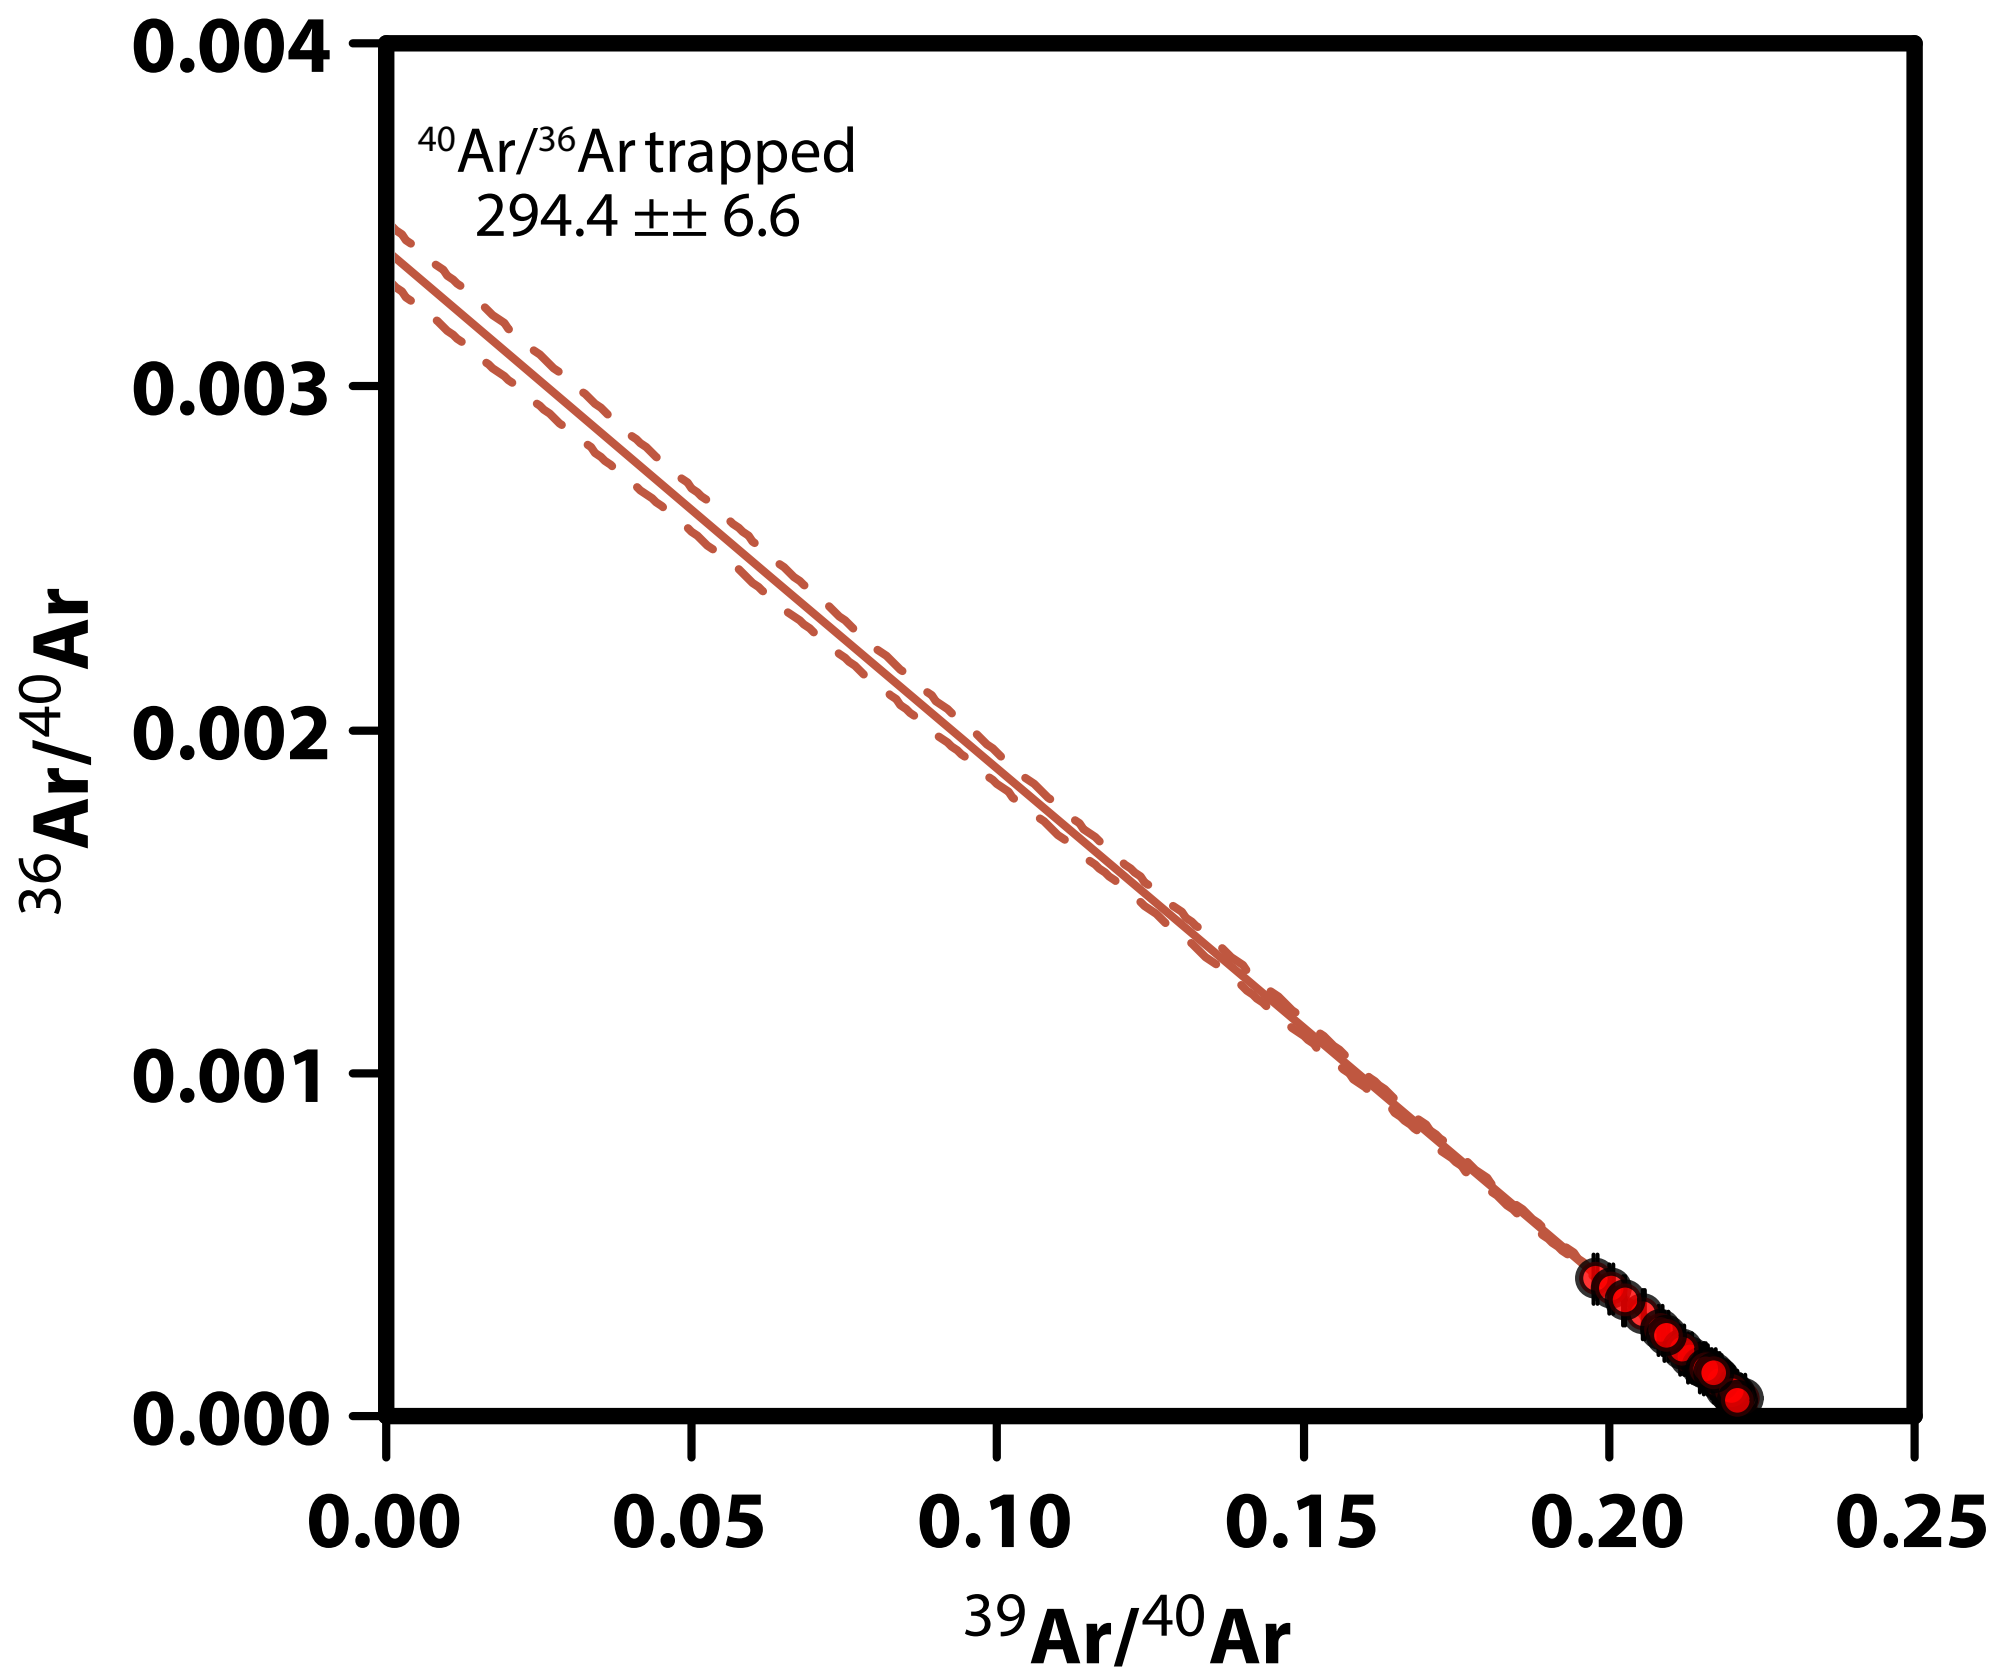

# Whitehorse Cyn rhyolite lava (TB-488)

$16.511 \pm 0.042$  Ma

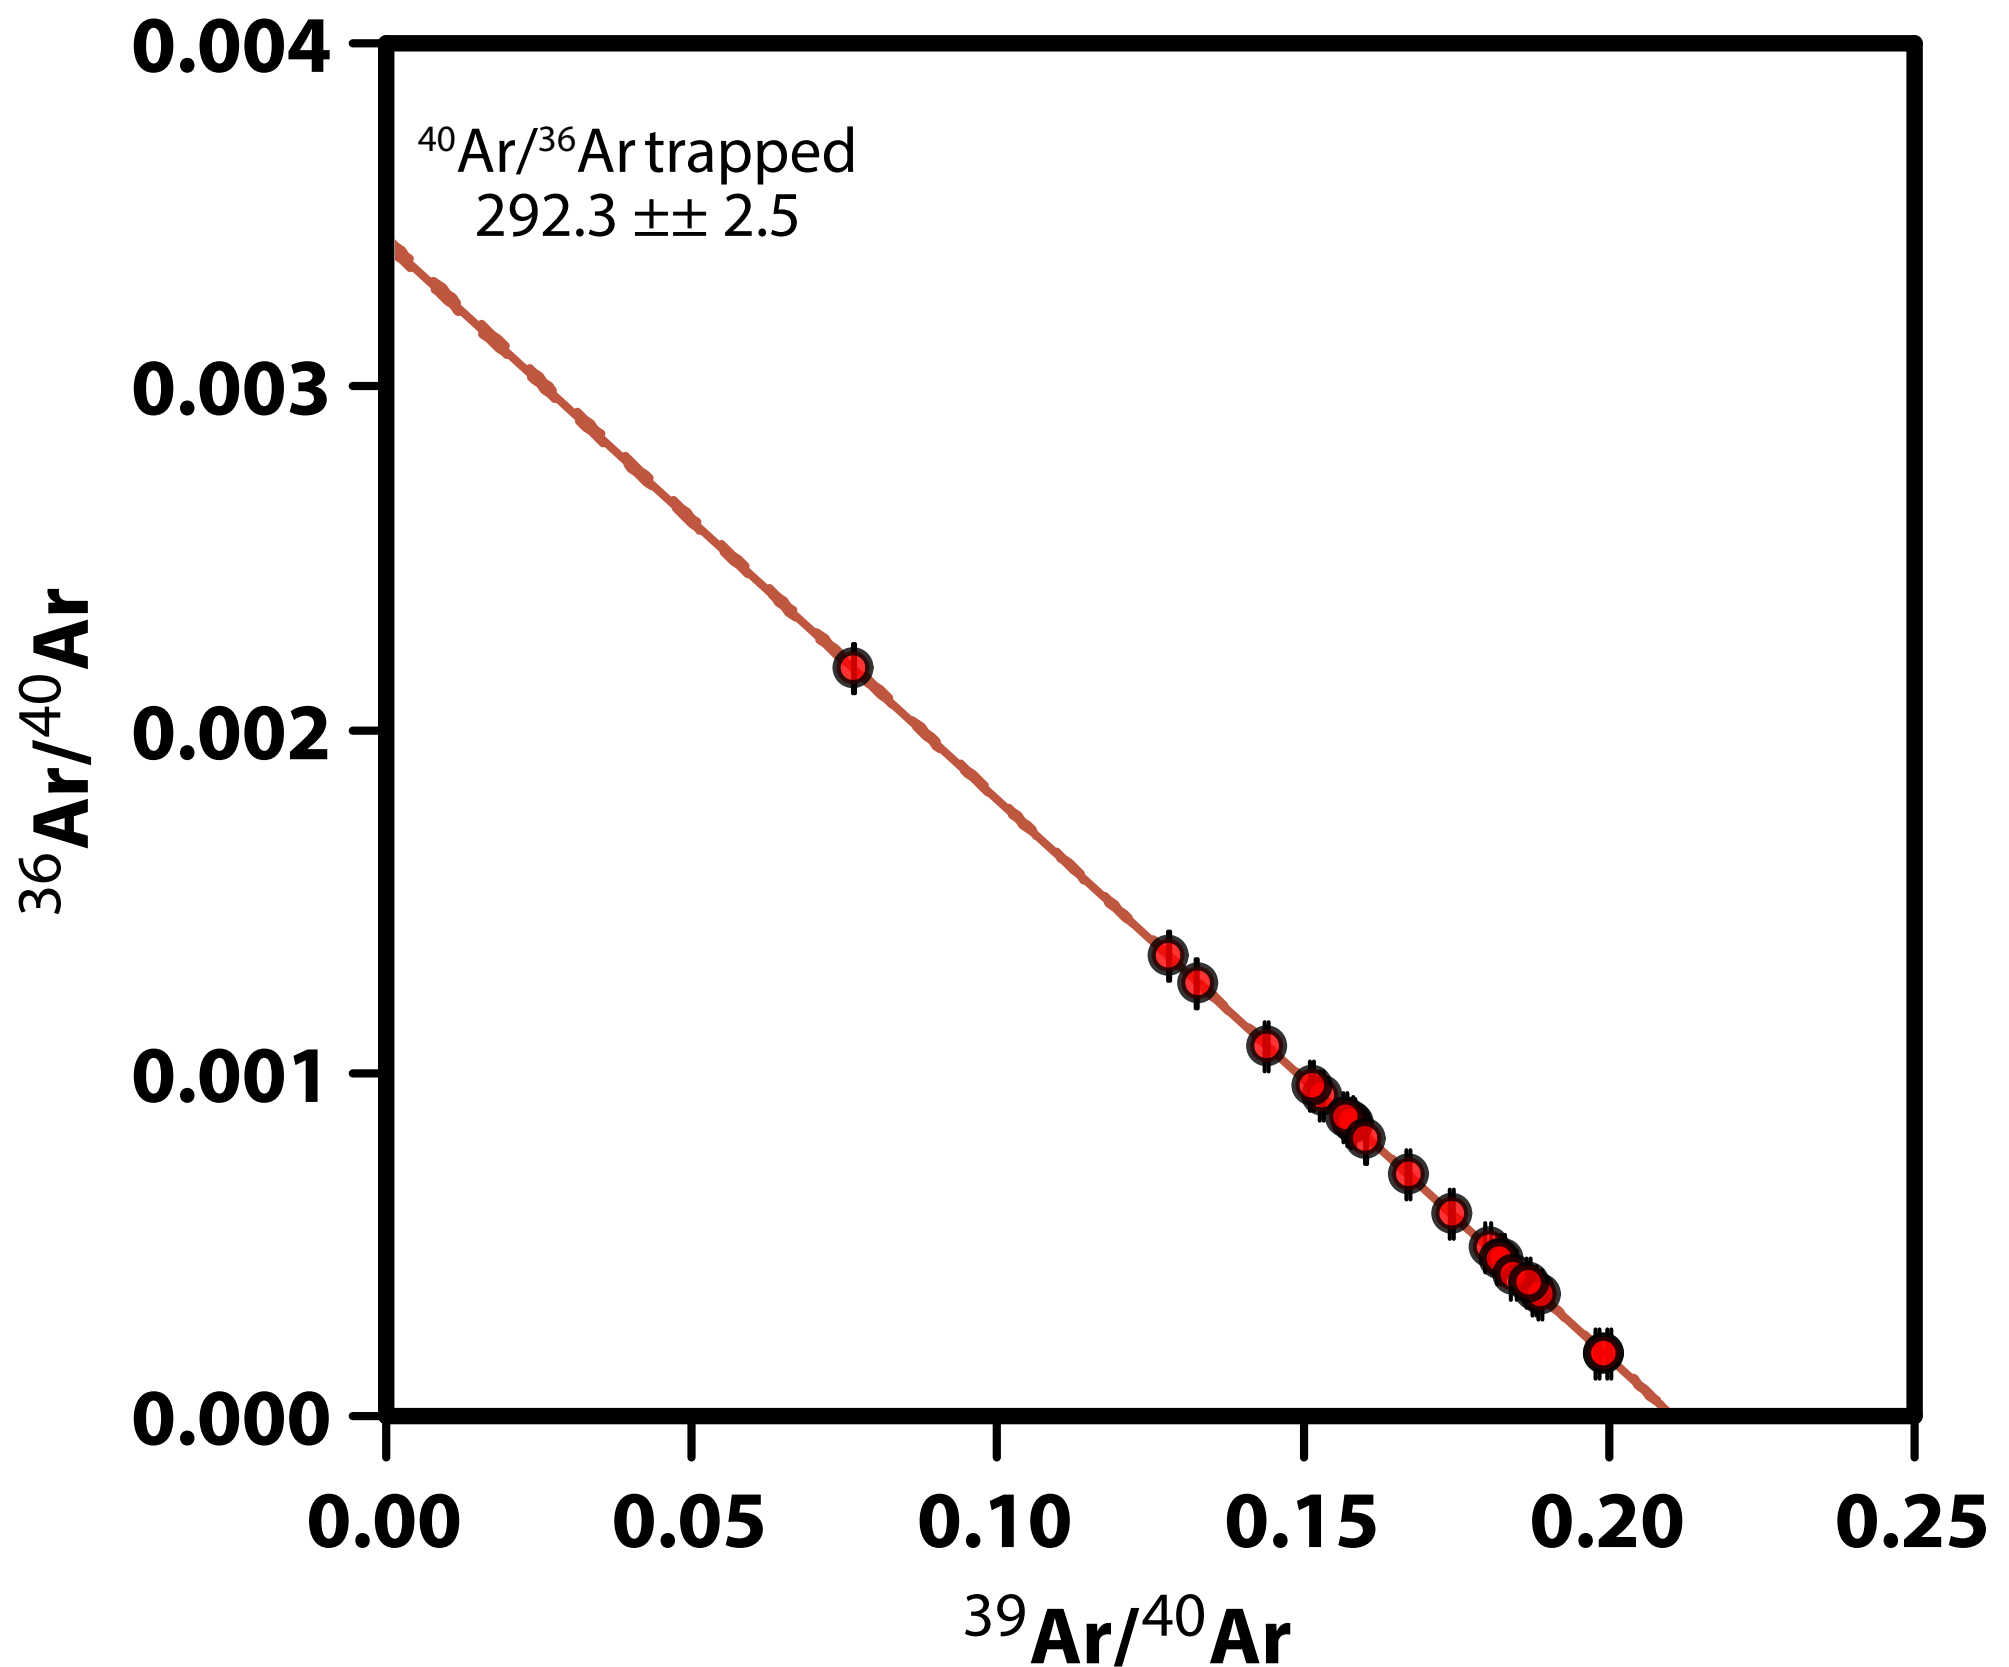

# Antelope Creek rhyolite lava (TB-517)

$16.450 \pm \pm 0.028$  Ma

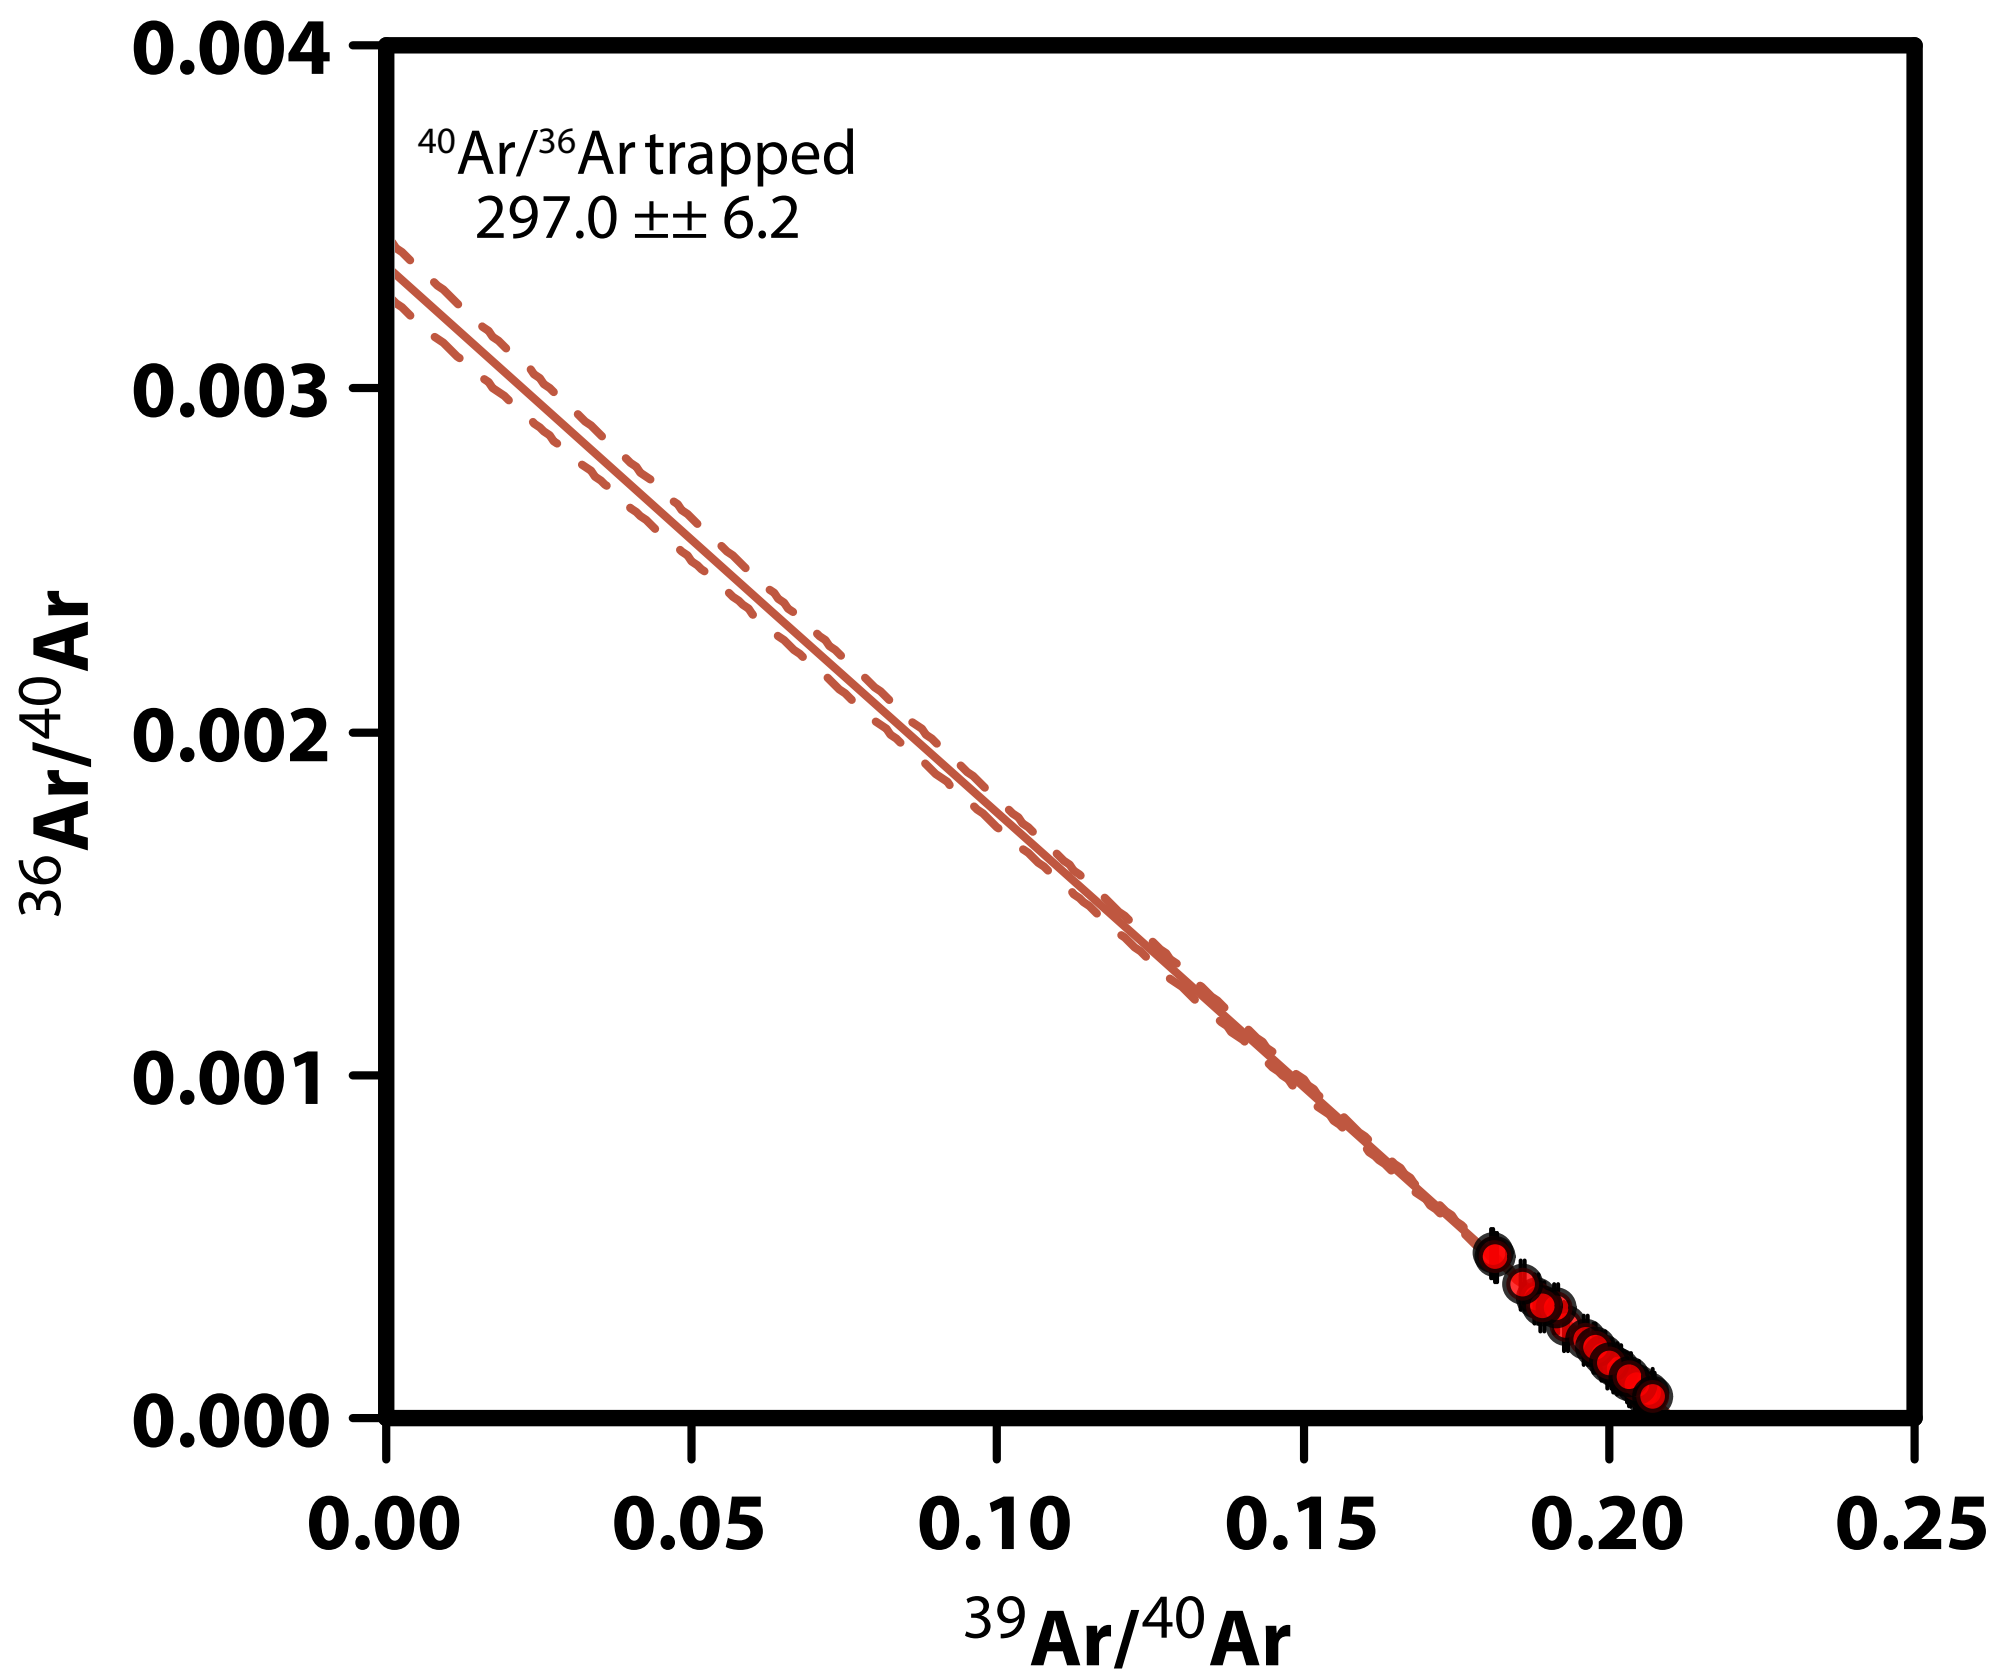

Tuff of Whitehorse Creek (TB-522C)  
15.537  $\pm$  0.032 Ma

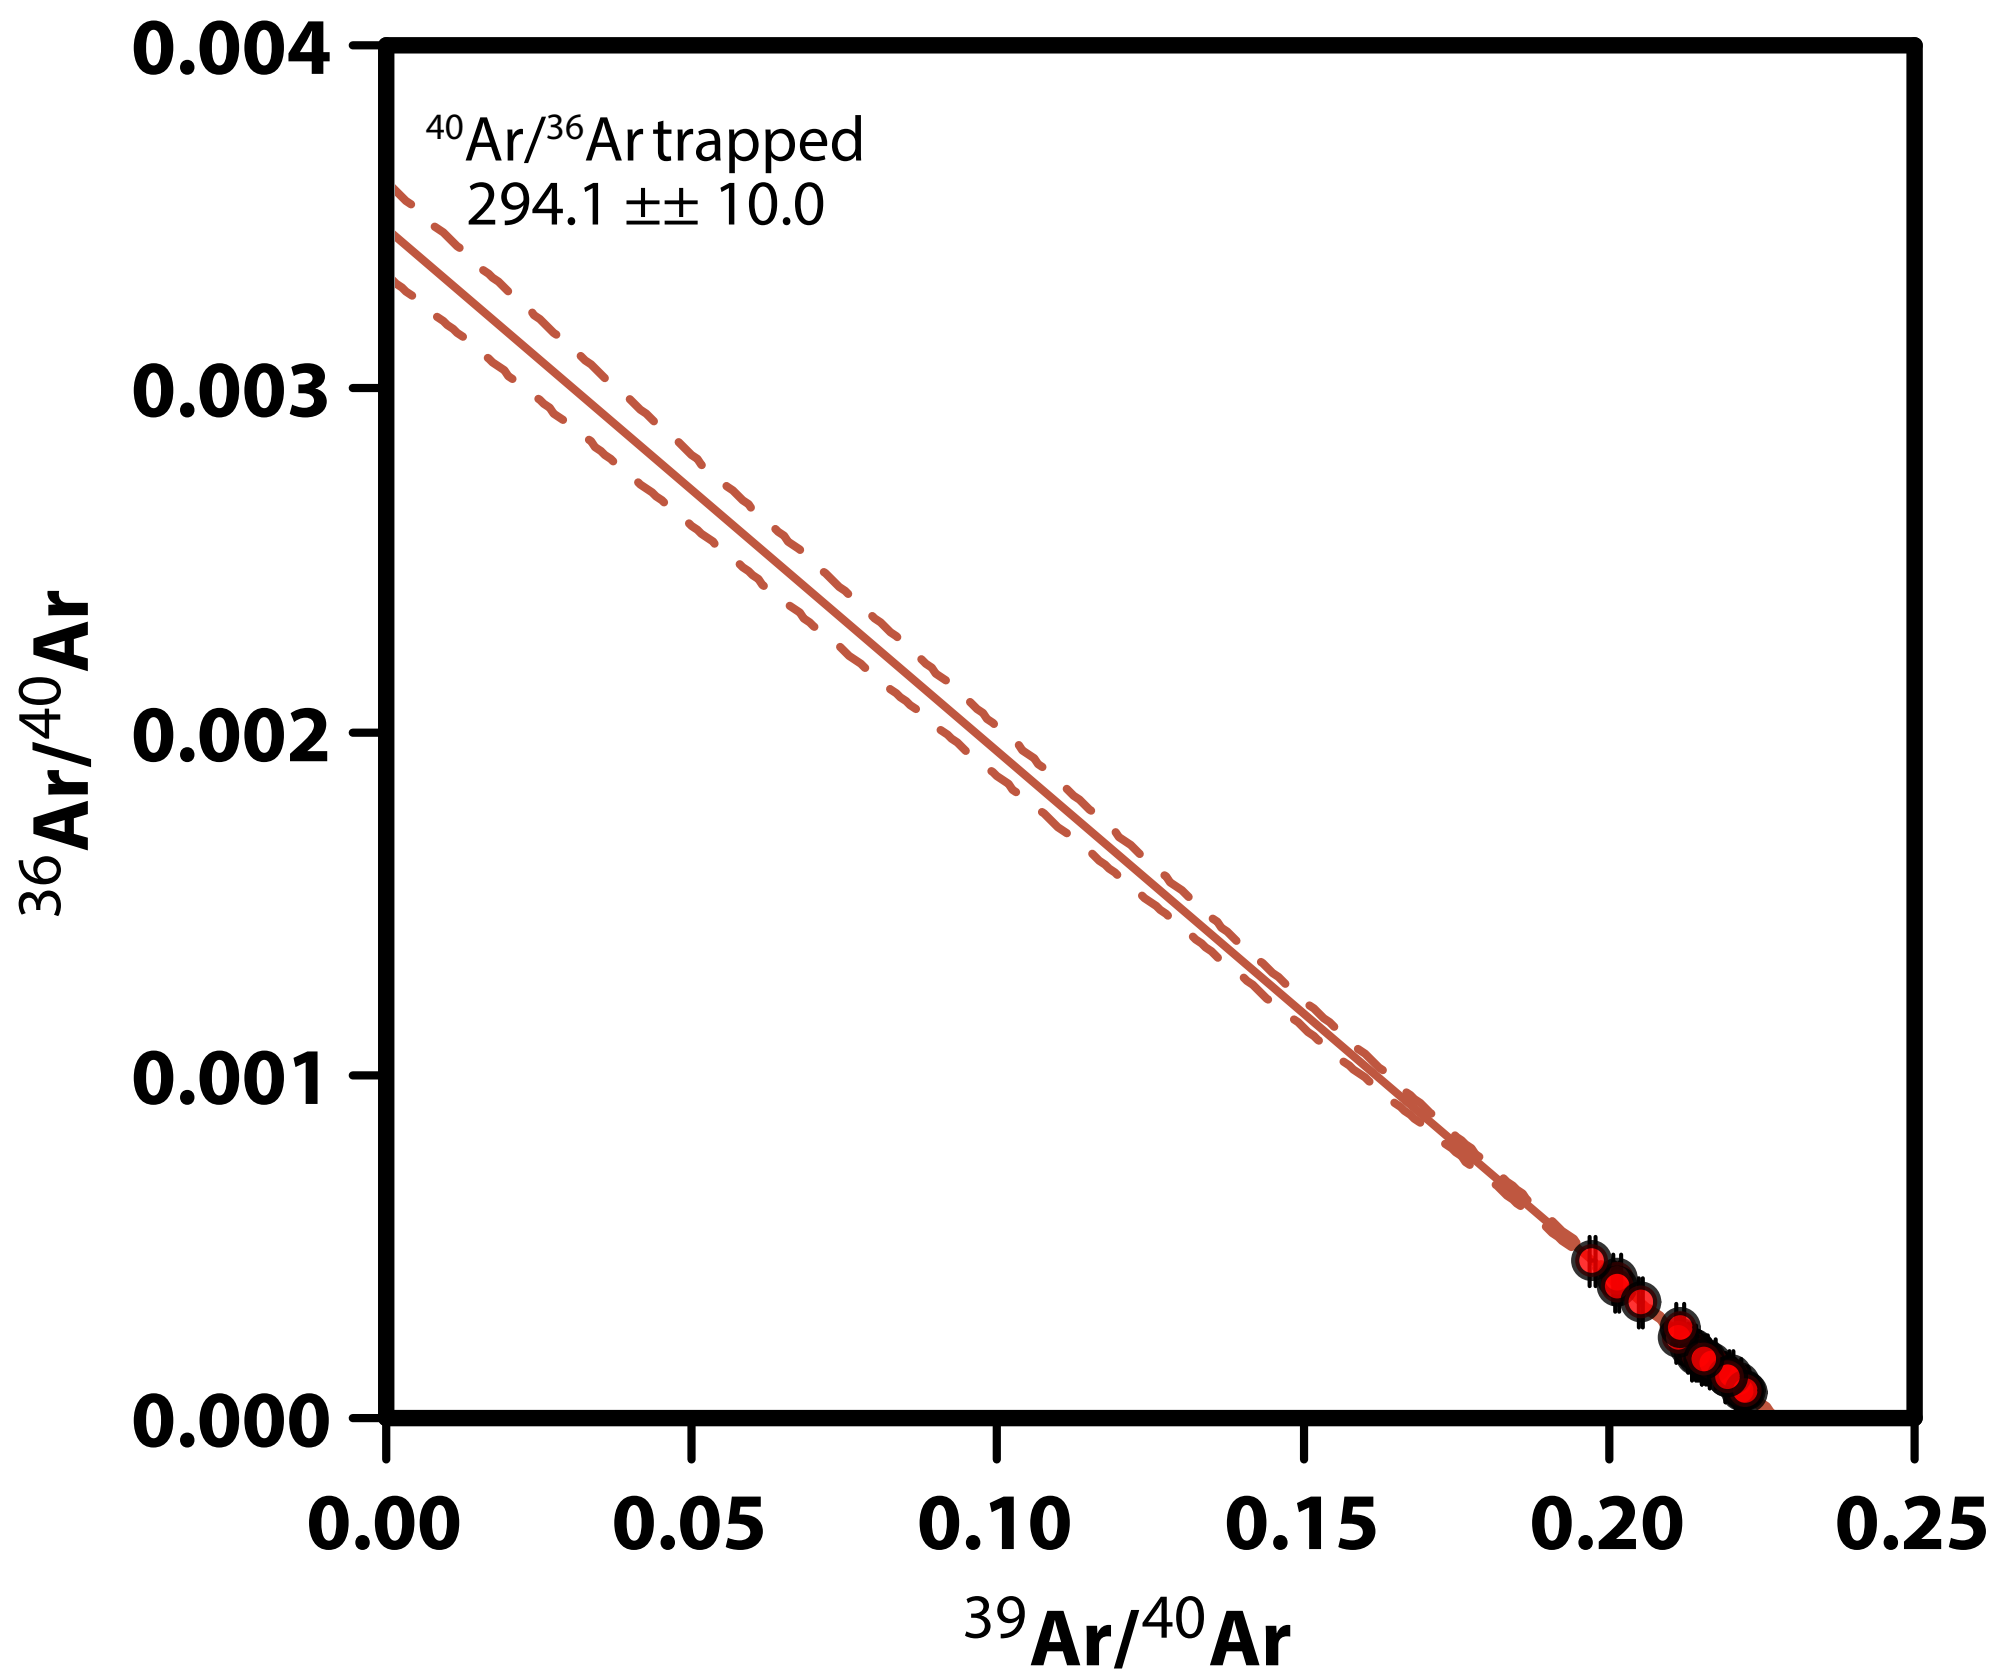

Tuff of Whitehorse Creek (TB-555)  
 $15.578 \pm \pm 0.020$  Ma

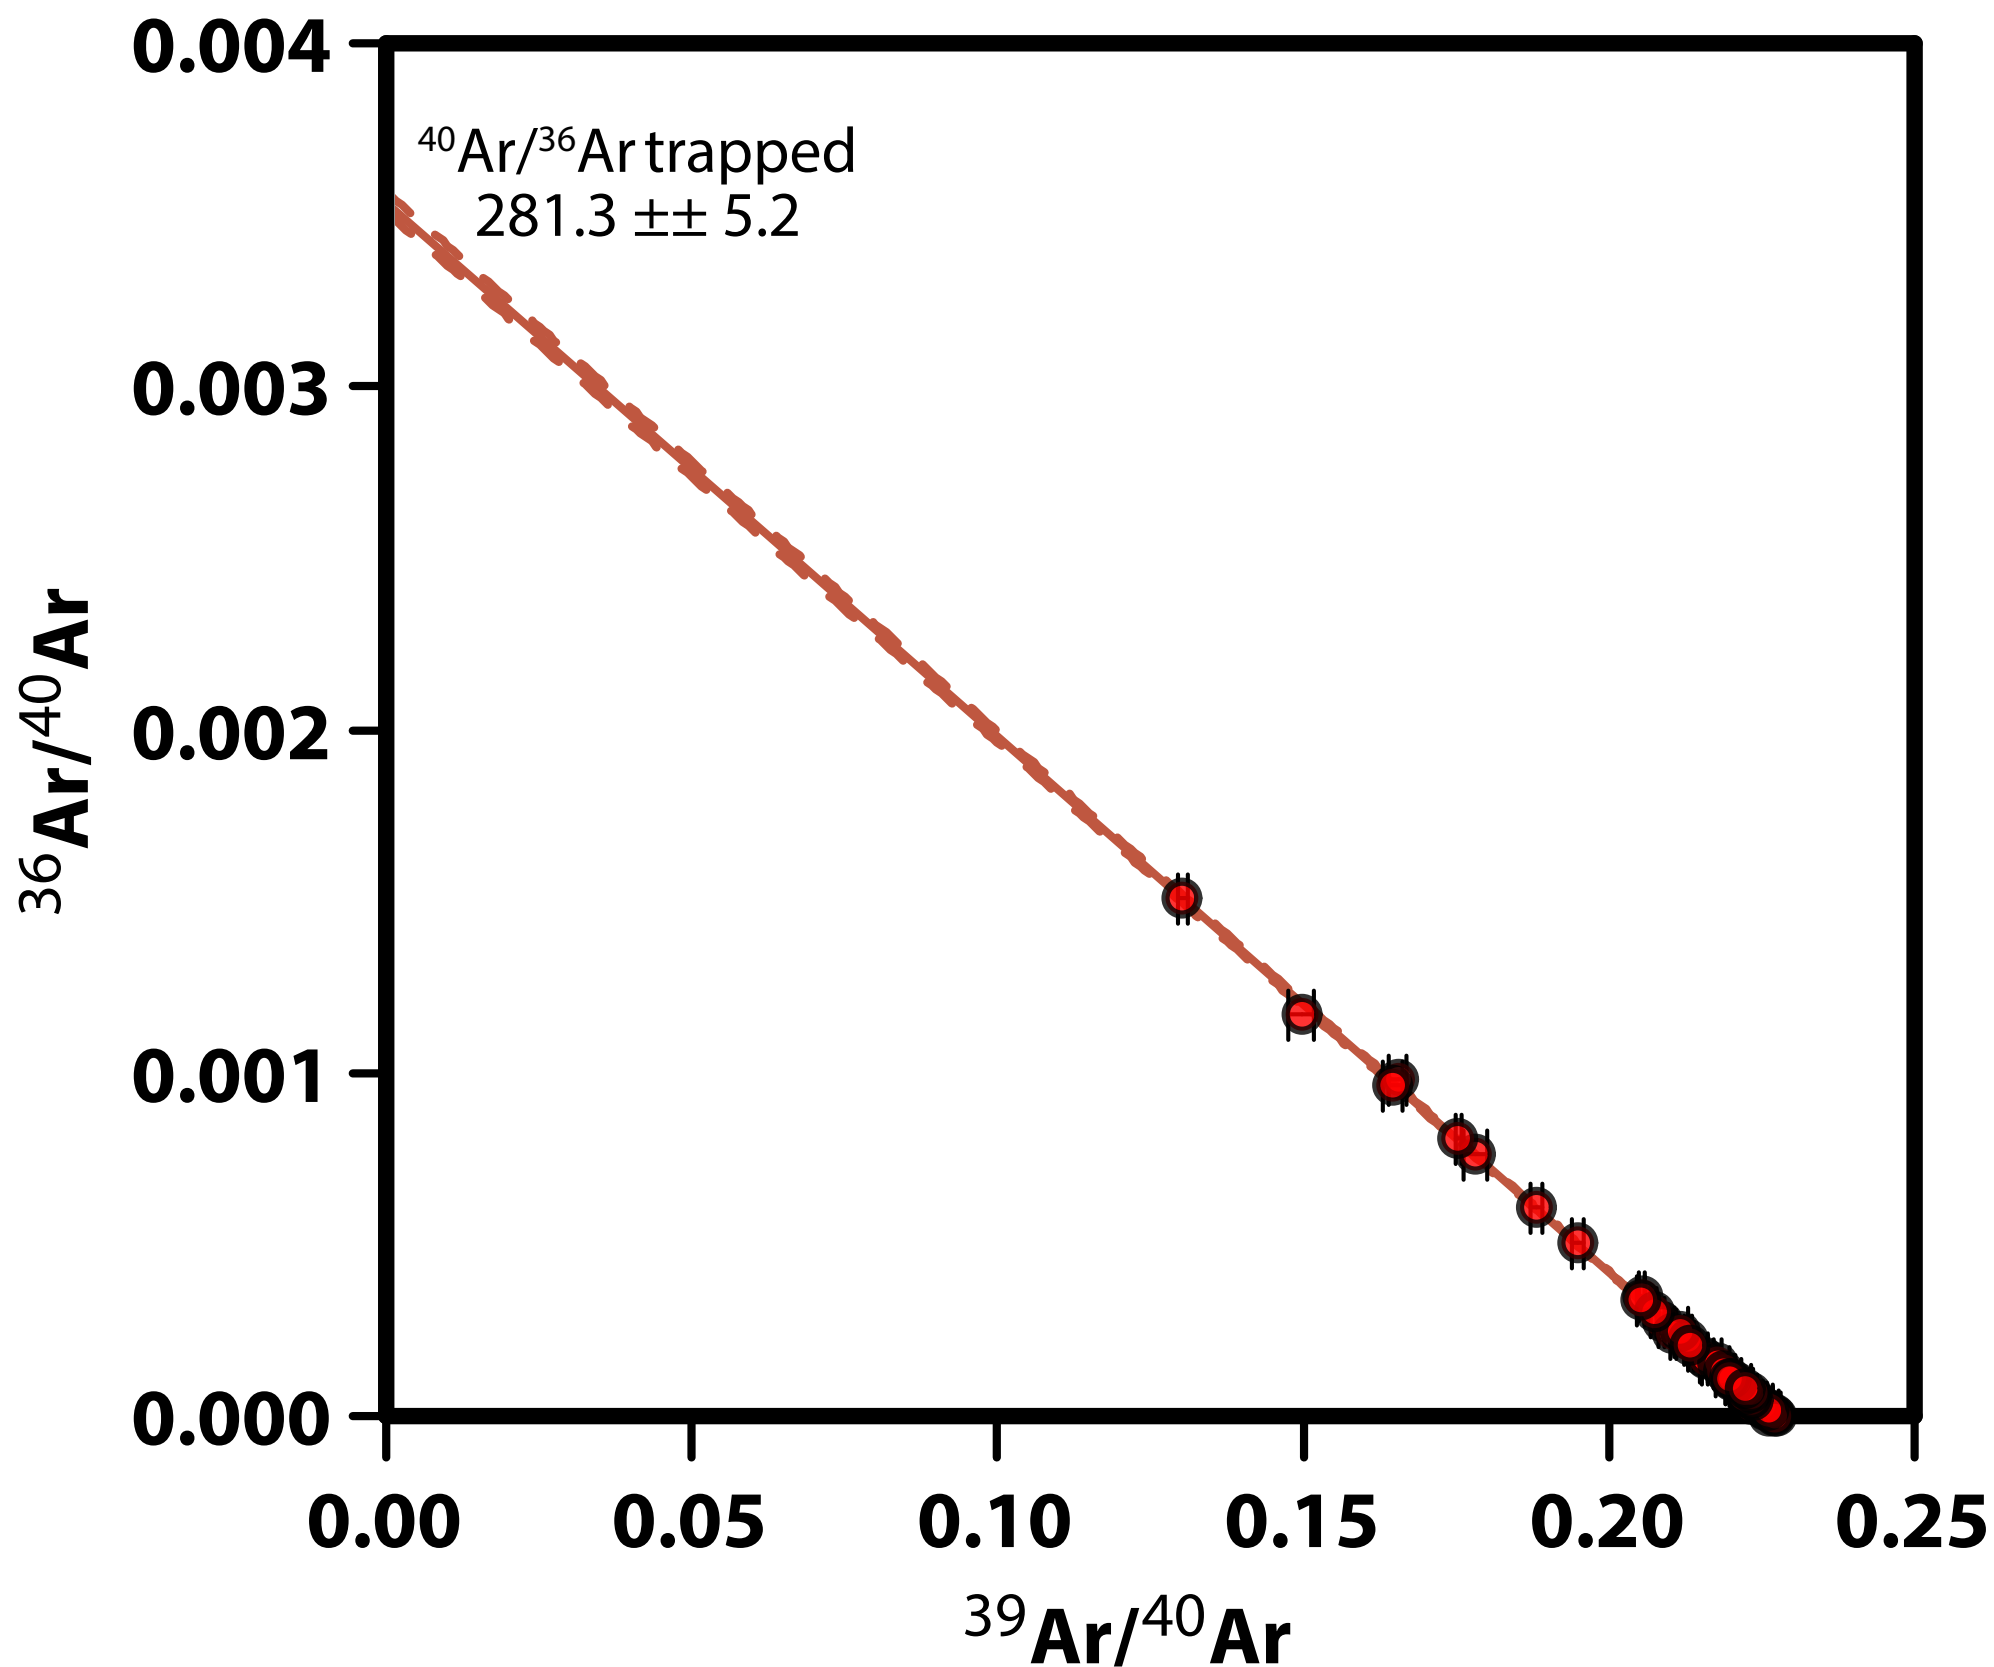

# Buckskin Mtn rhyolite lava (TB-558)

$15.526 \pm \pm 0.032$  Ma

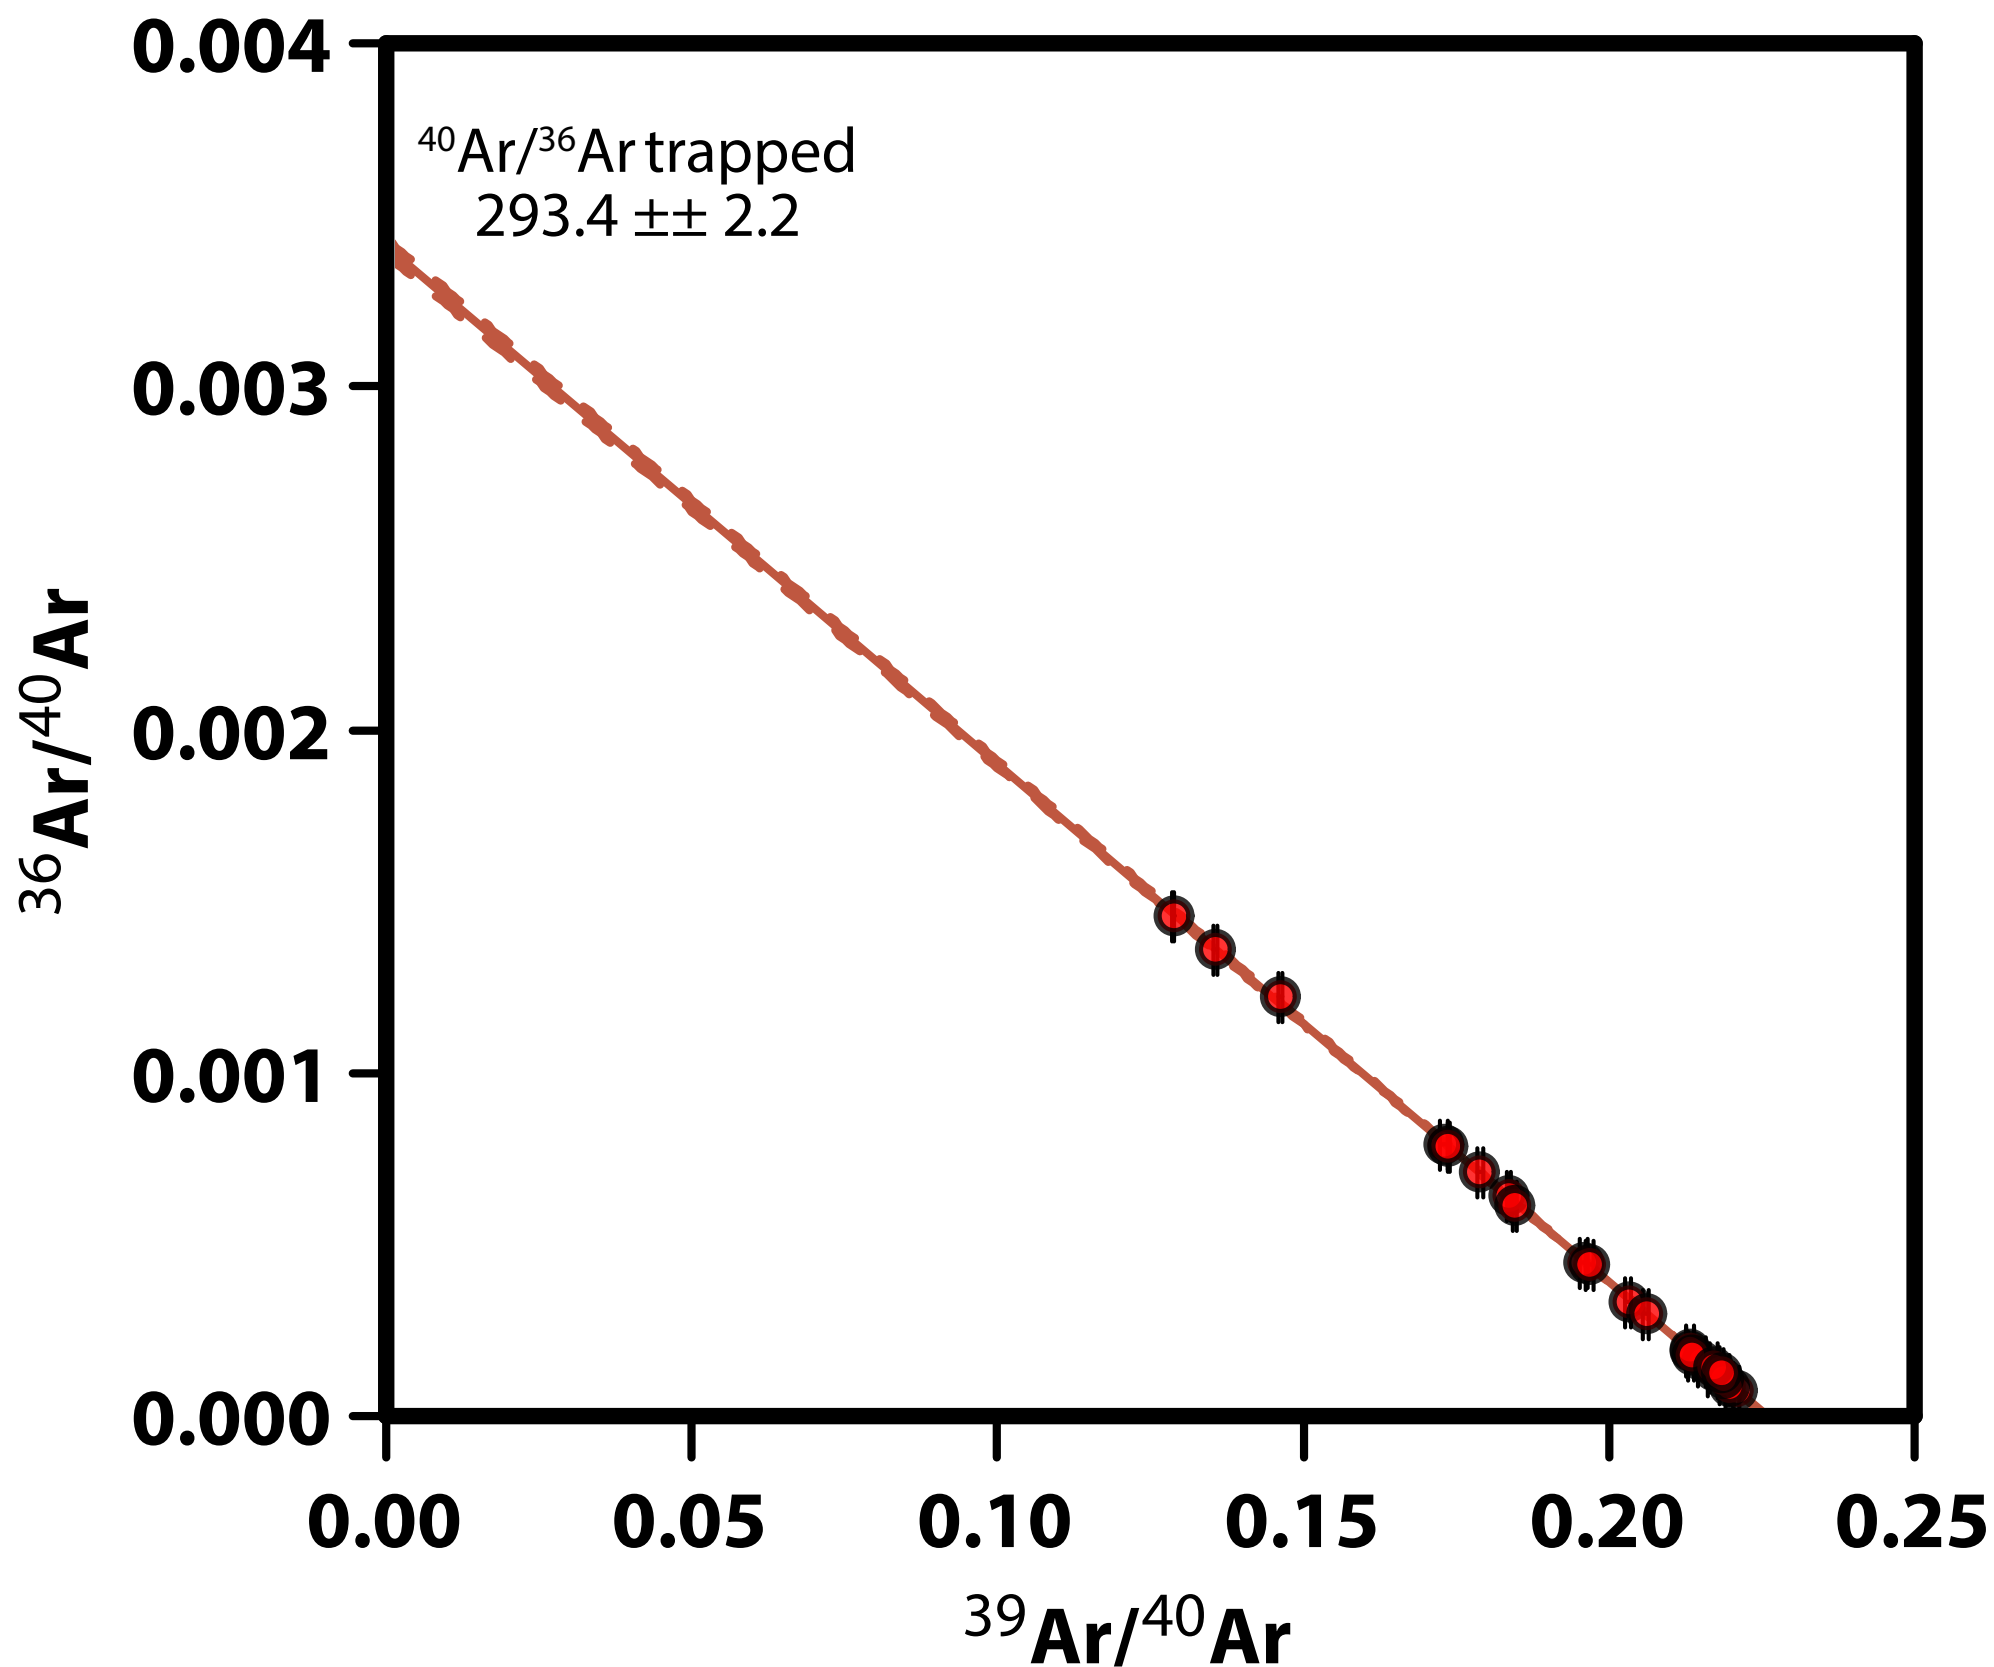

# Red Lookout Butte rhyolite lava (TB-563)

$15.589 \pm \pm 0.026$  Ma

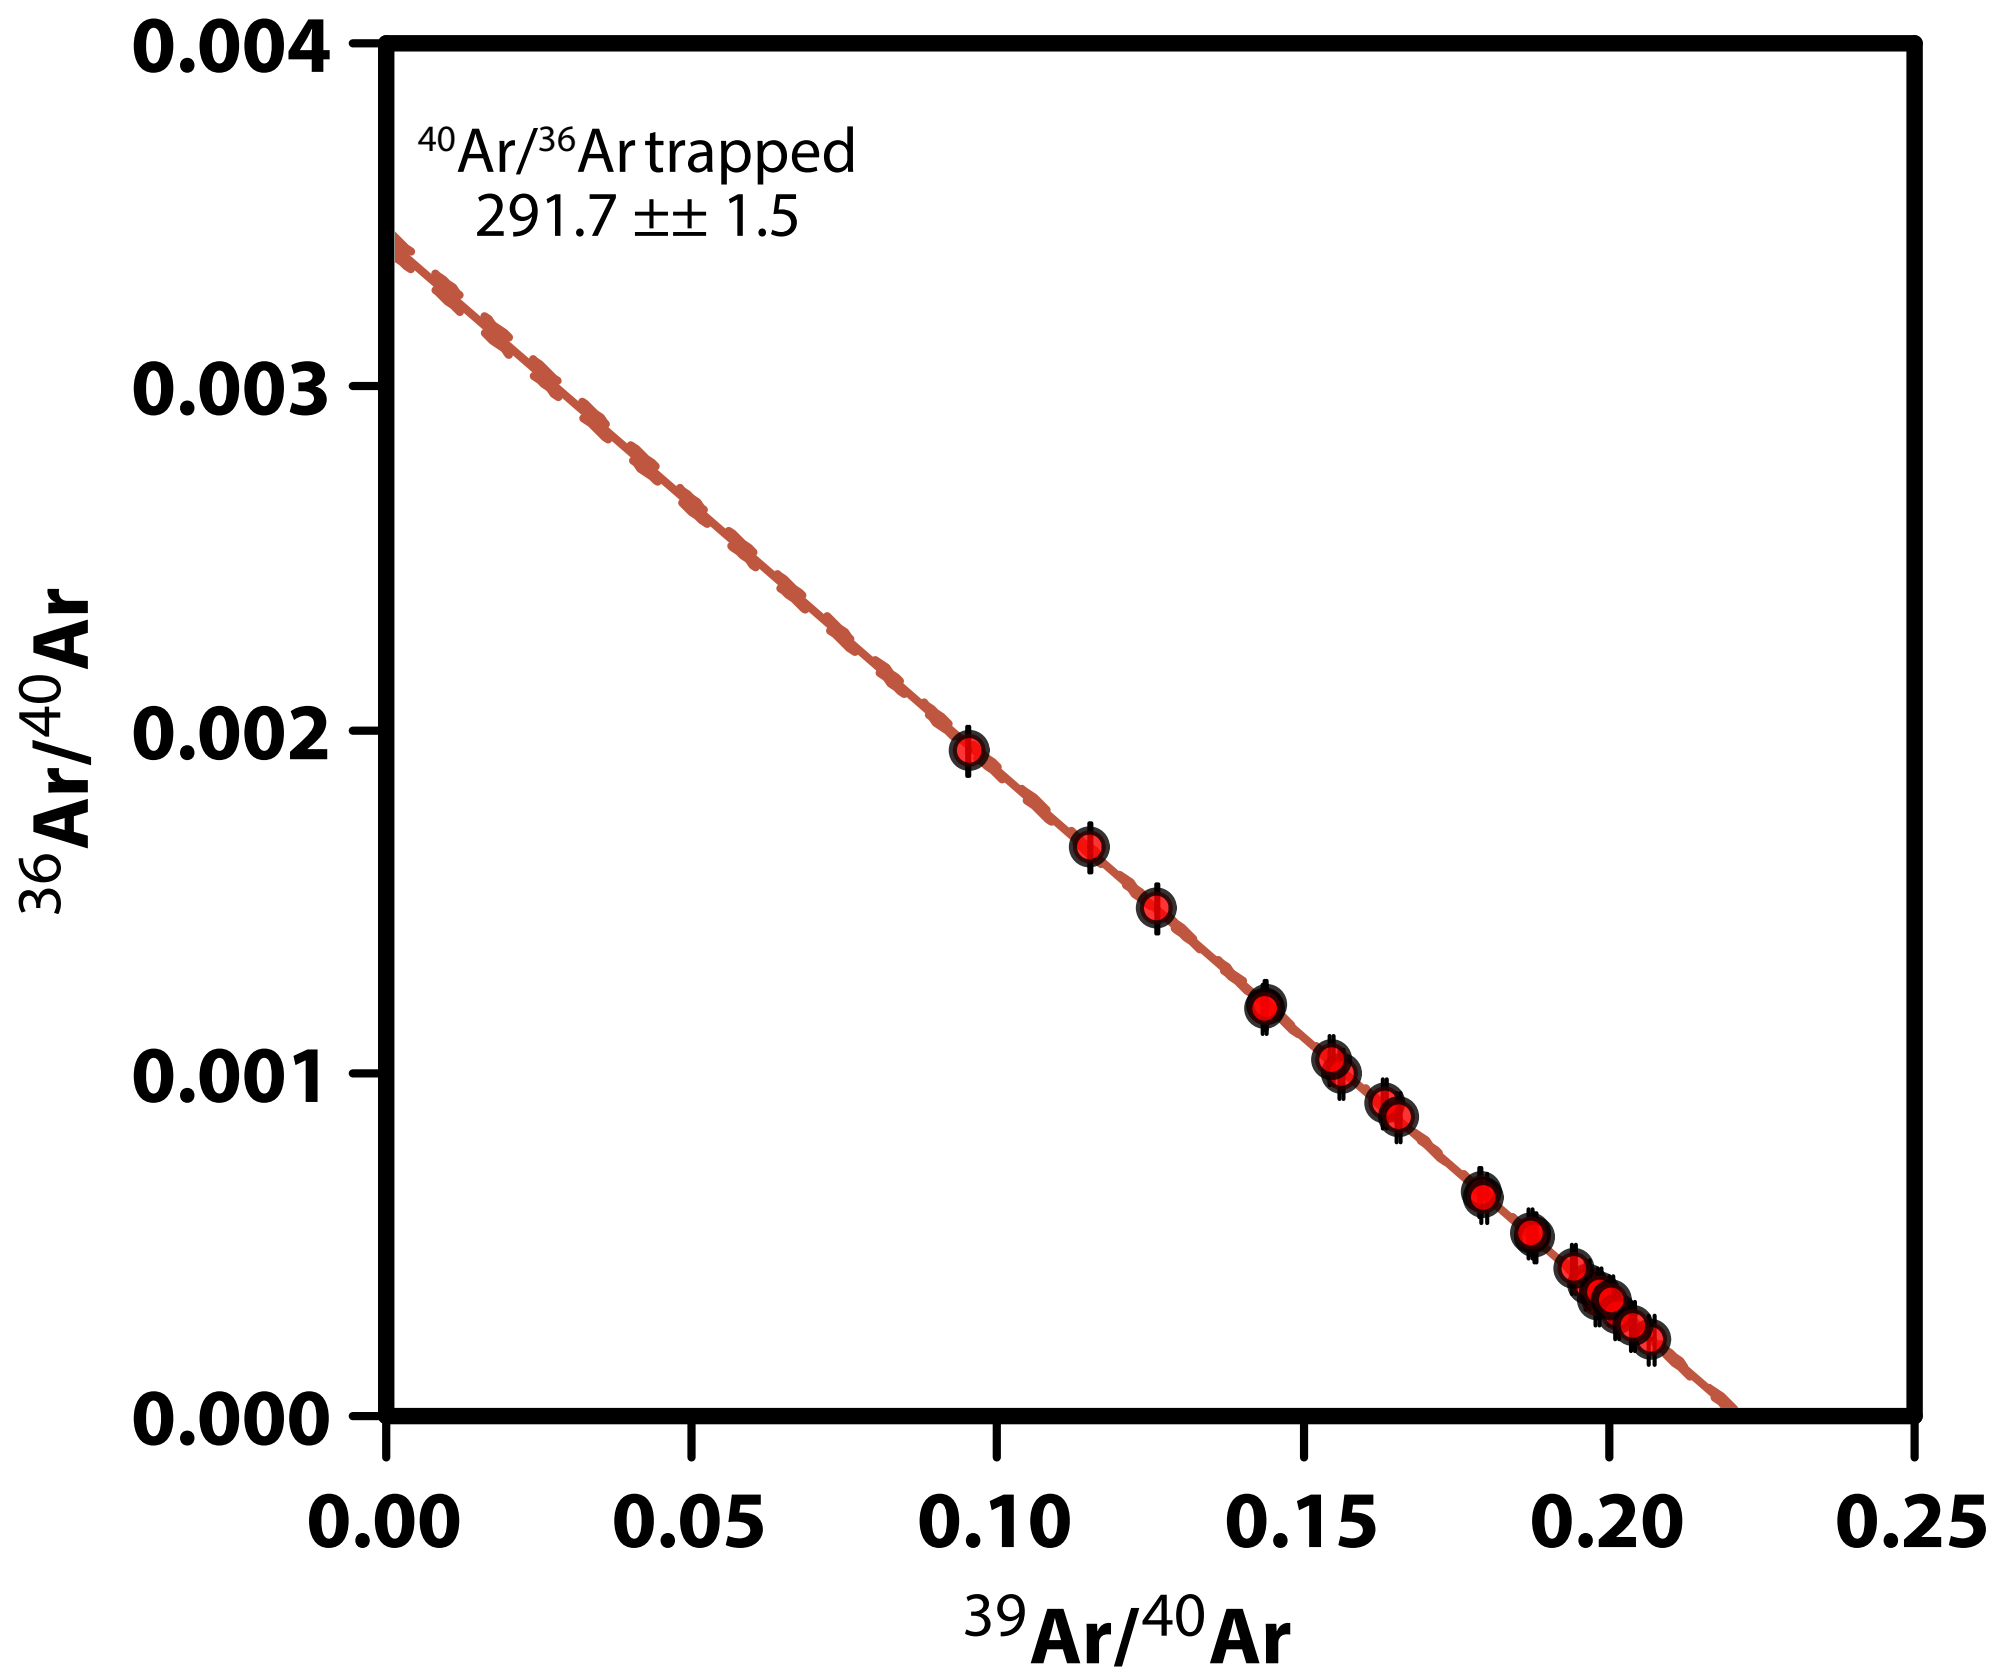



# Tuff of Whitehorse Creek (TB-566)

$15.532 \pm \pm 0.026$  Ma

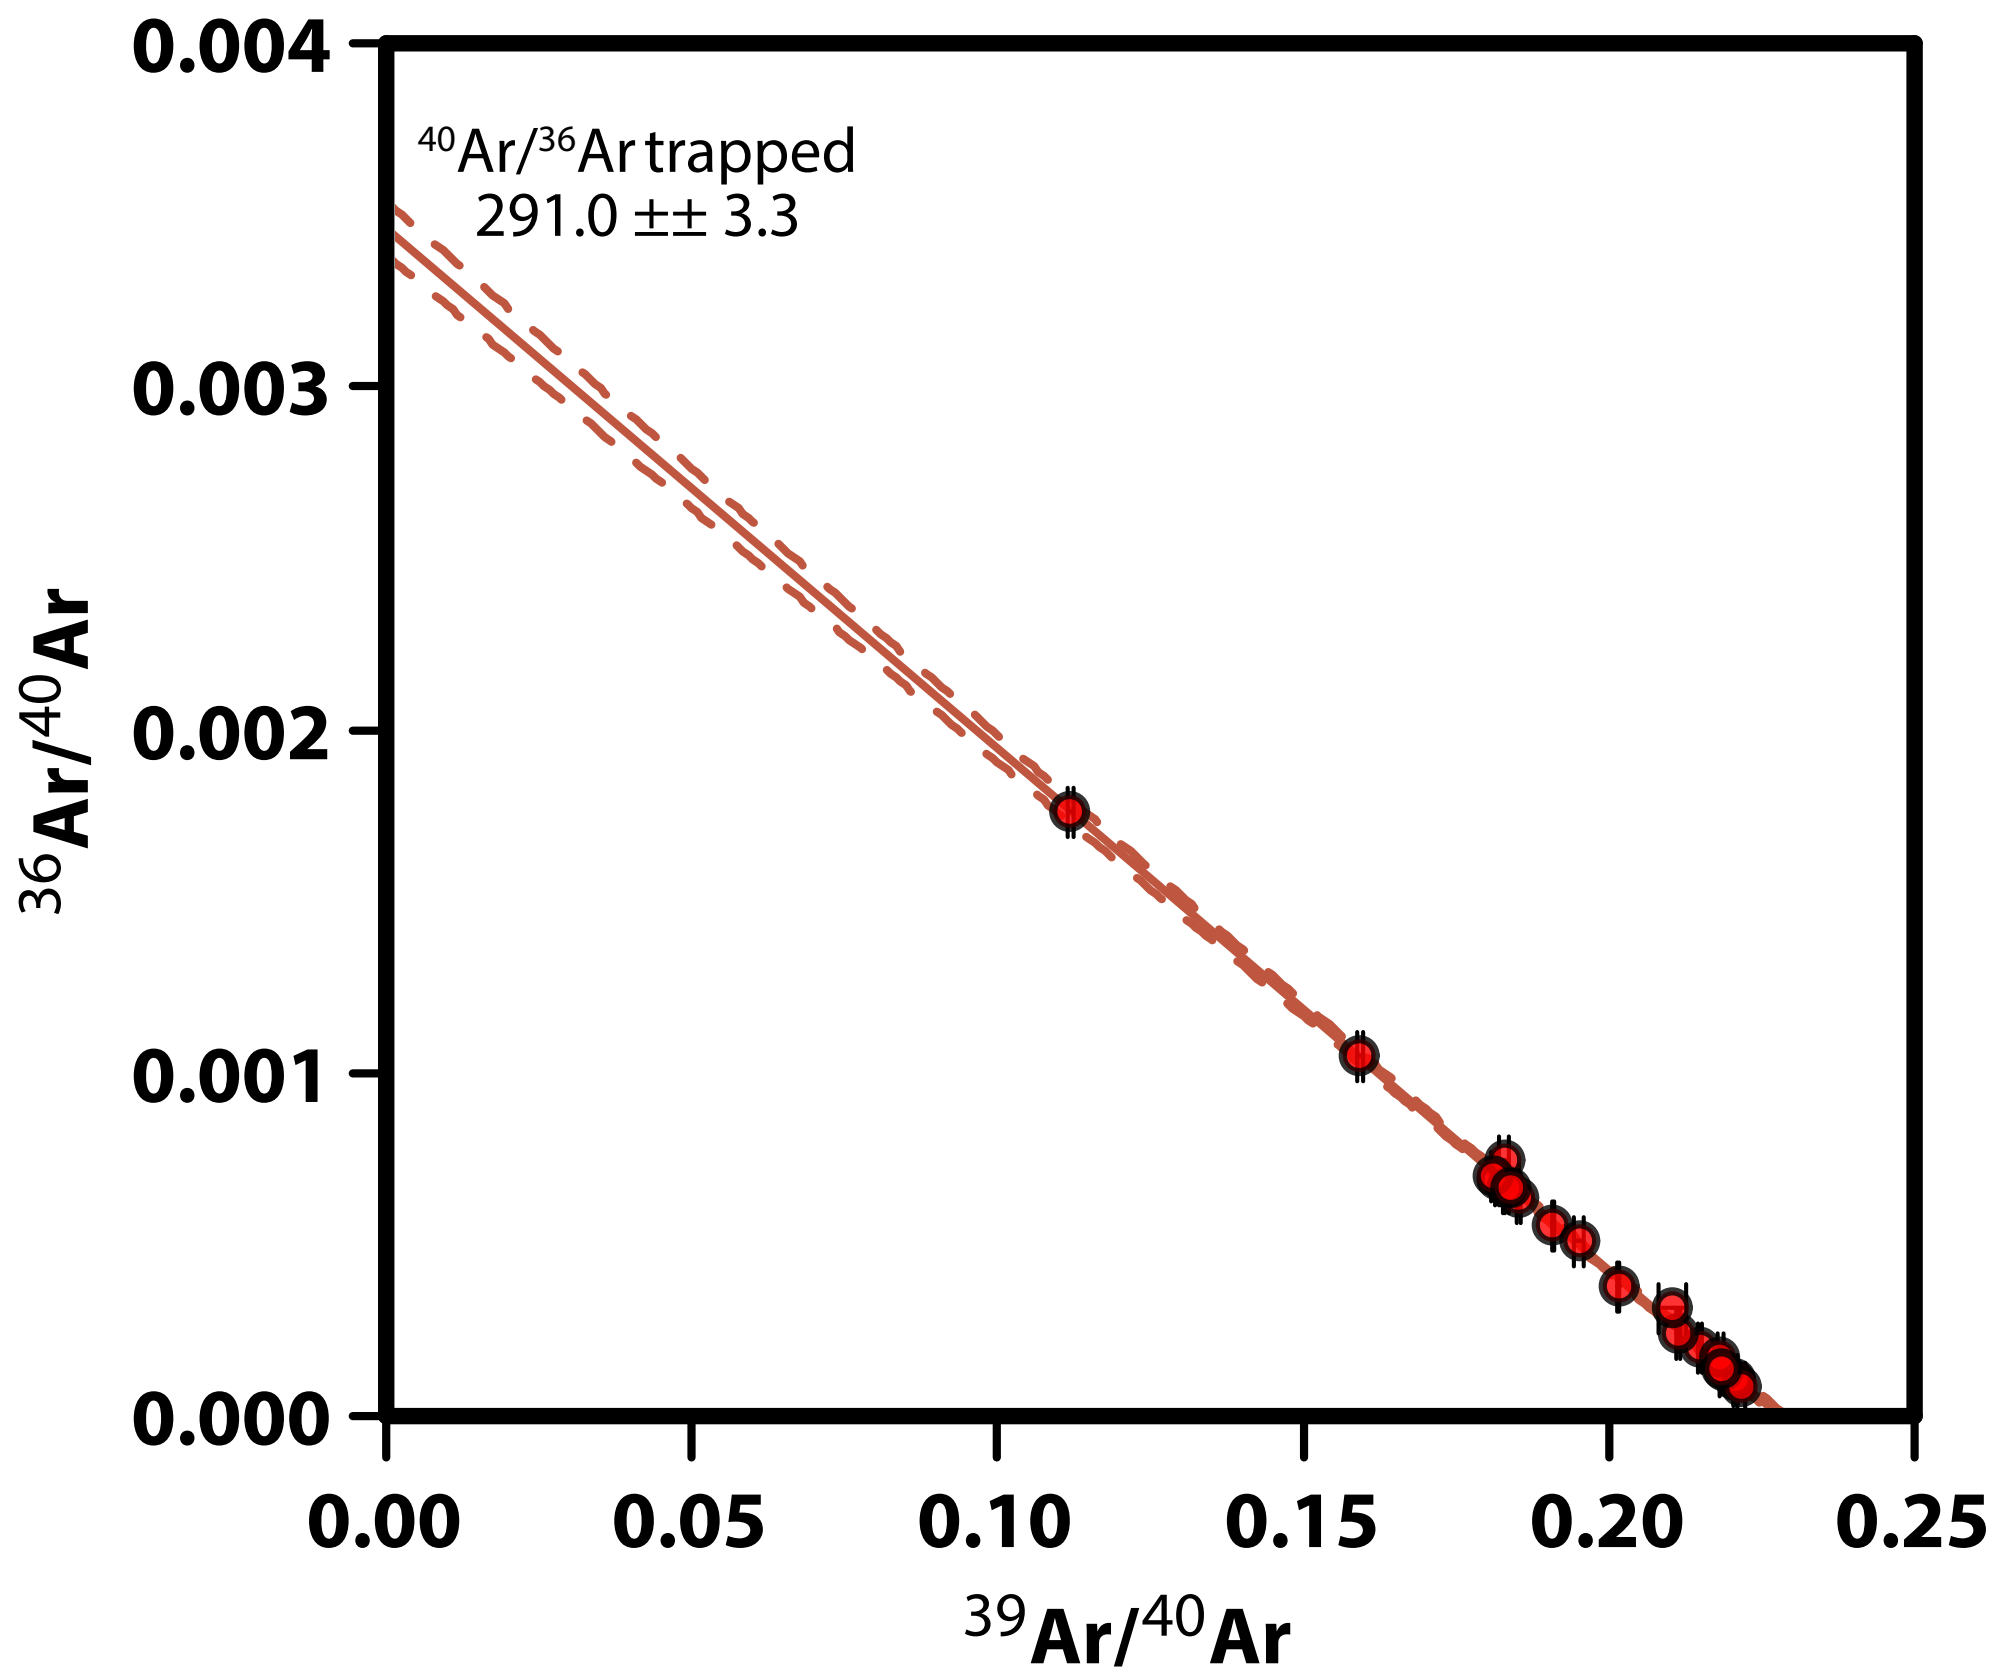

# Tule Rims rhyolite lava (TB-567)

$16.122 \pm \pm 0.020$  Ma

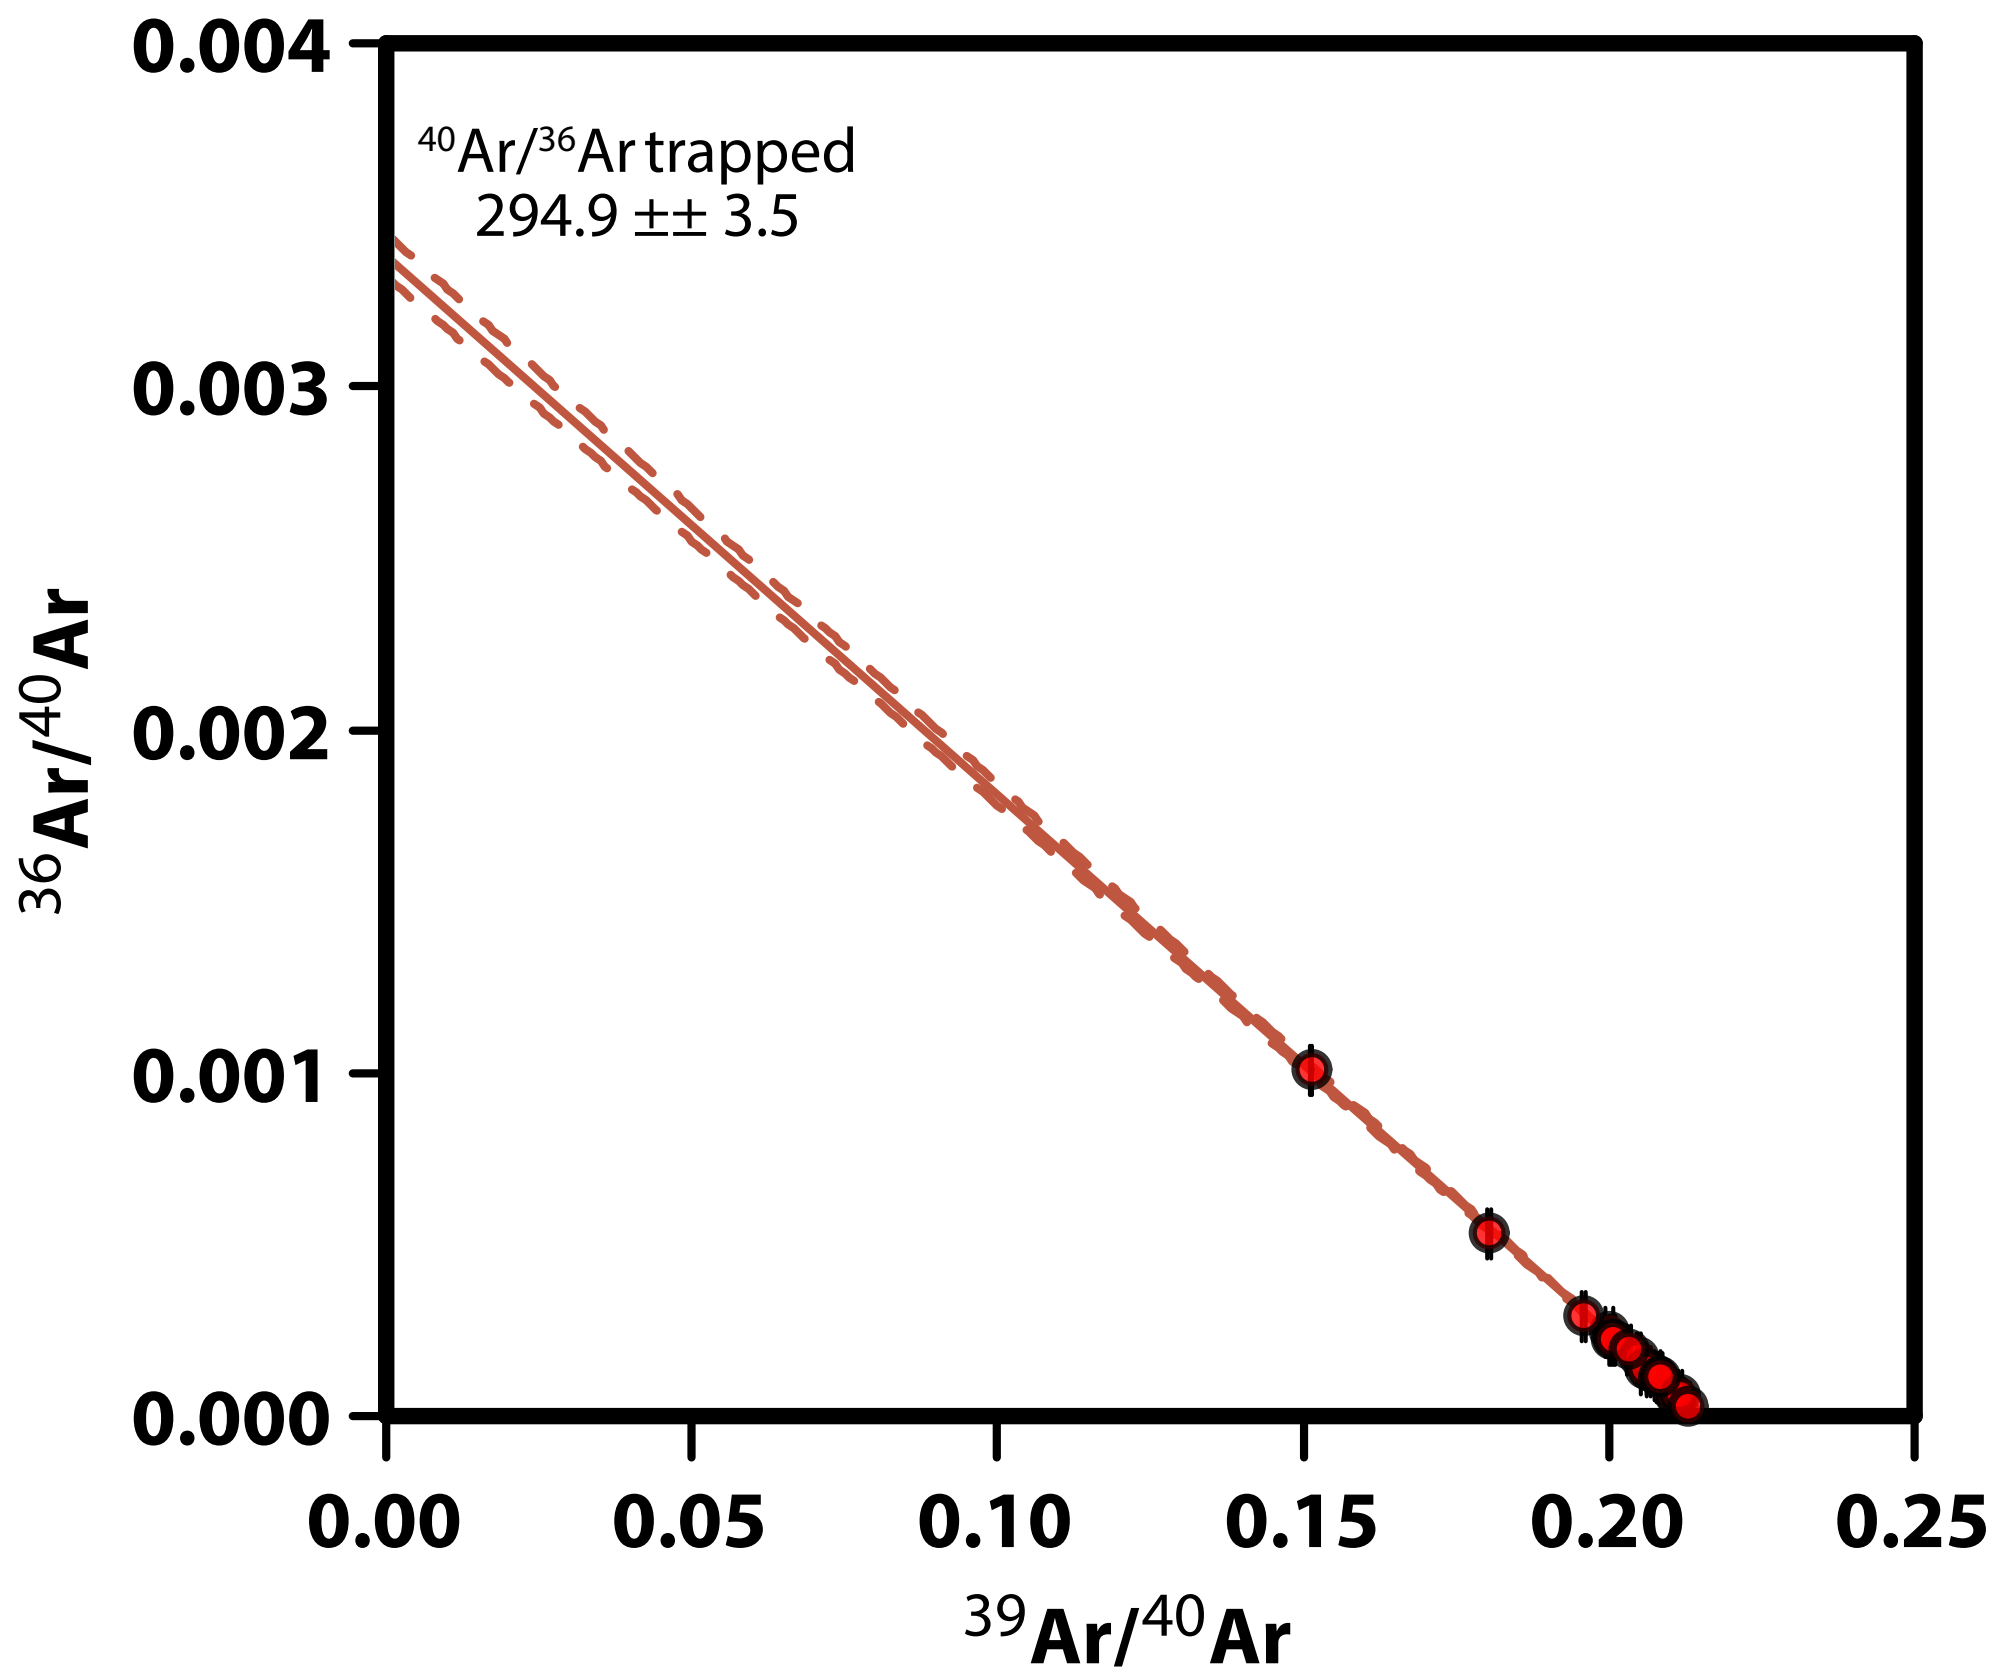

# N. Red Mountain rhyolite lava (TB-571)

$16.513 \pm \pm 0.022$  Ma

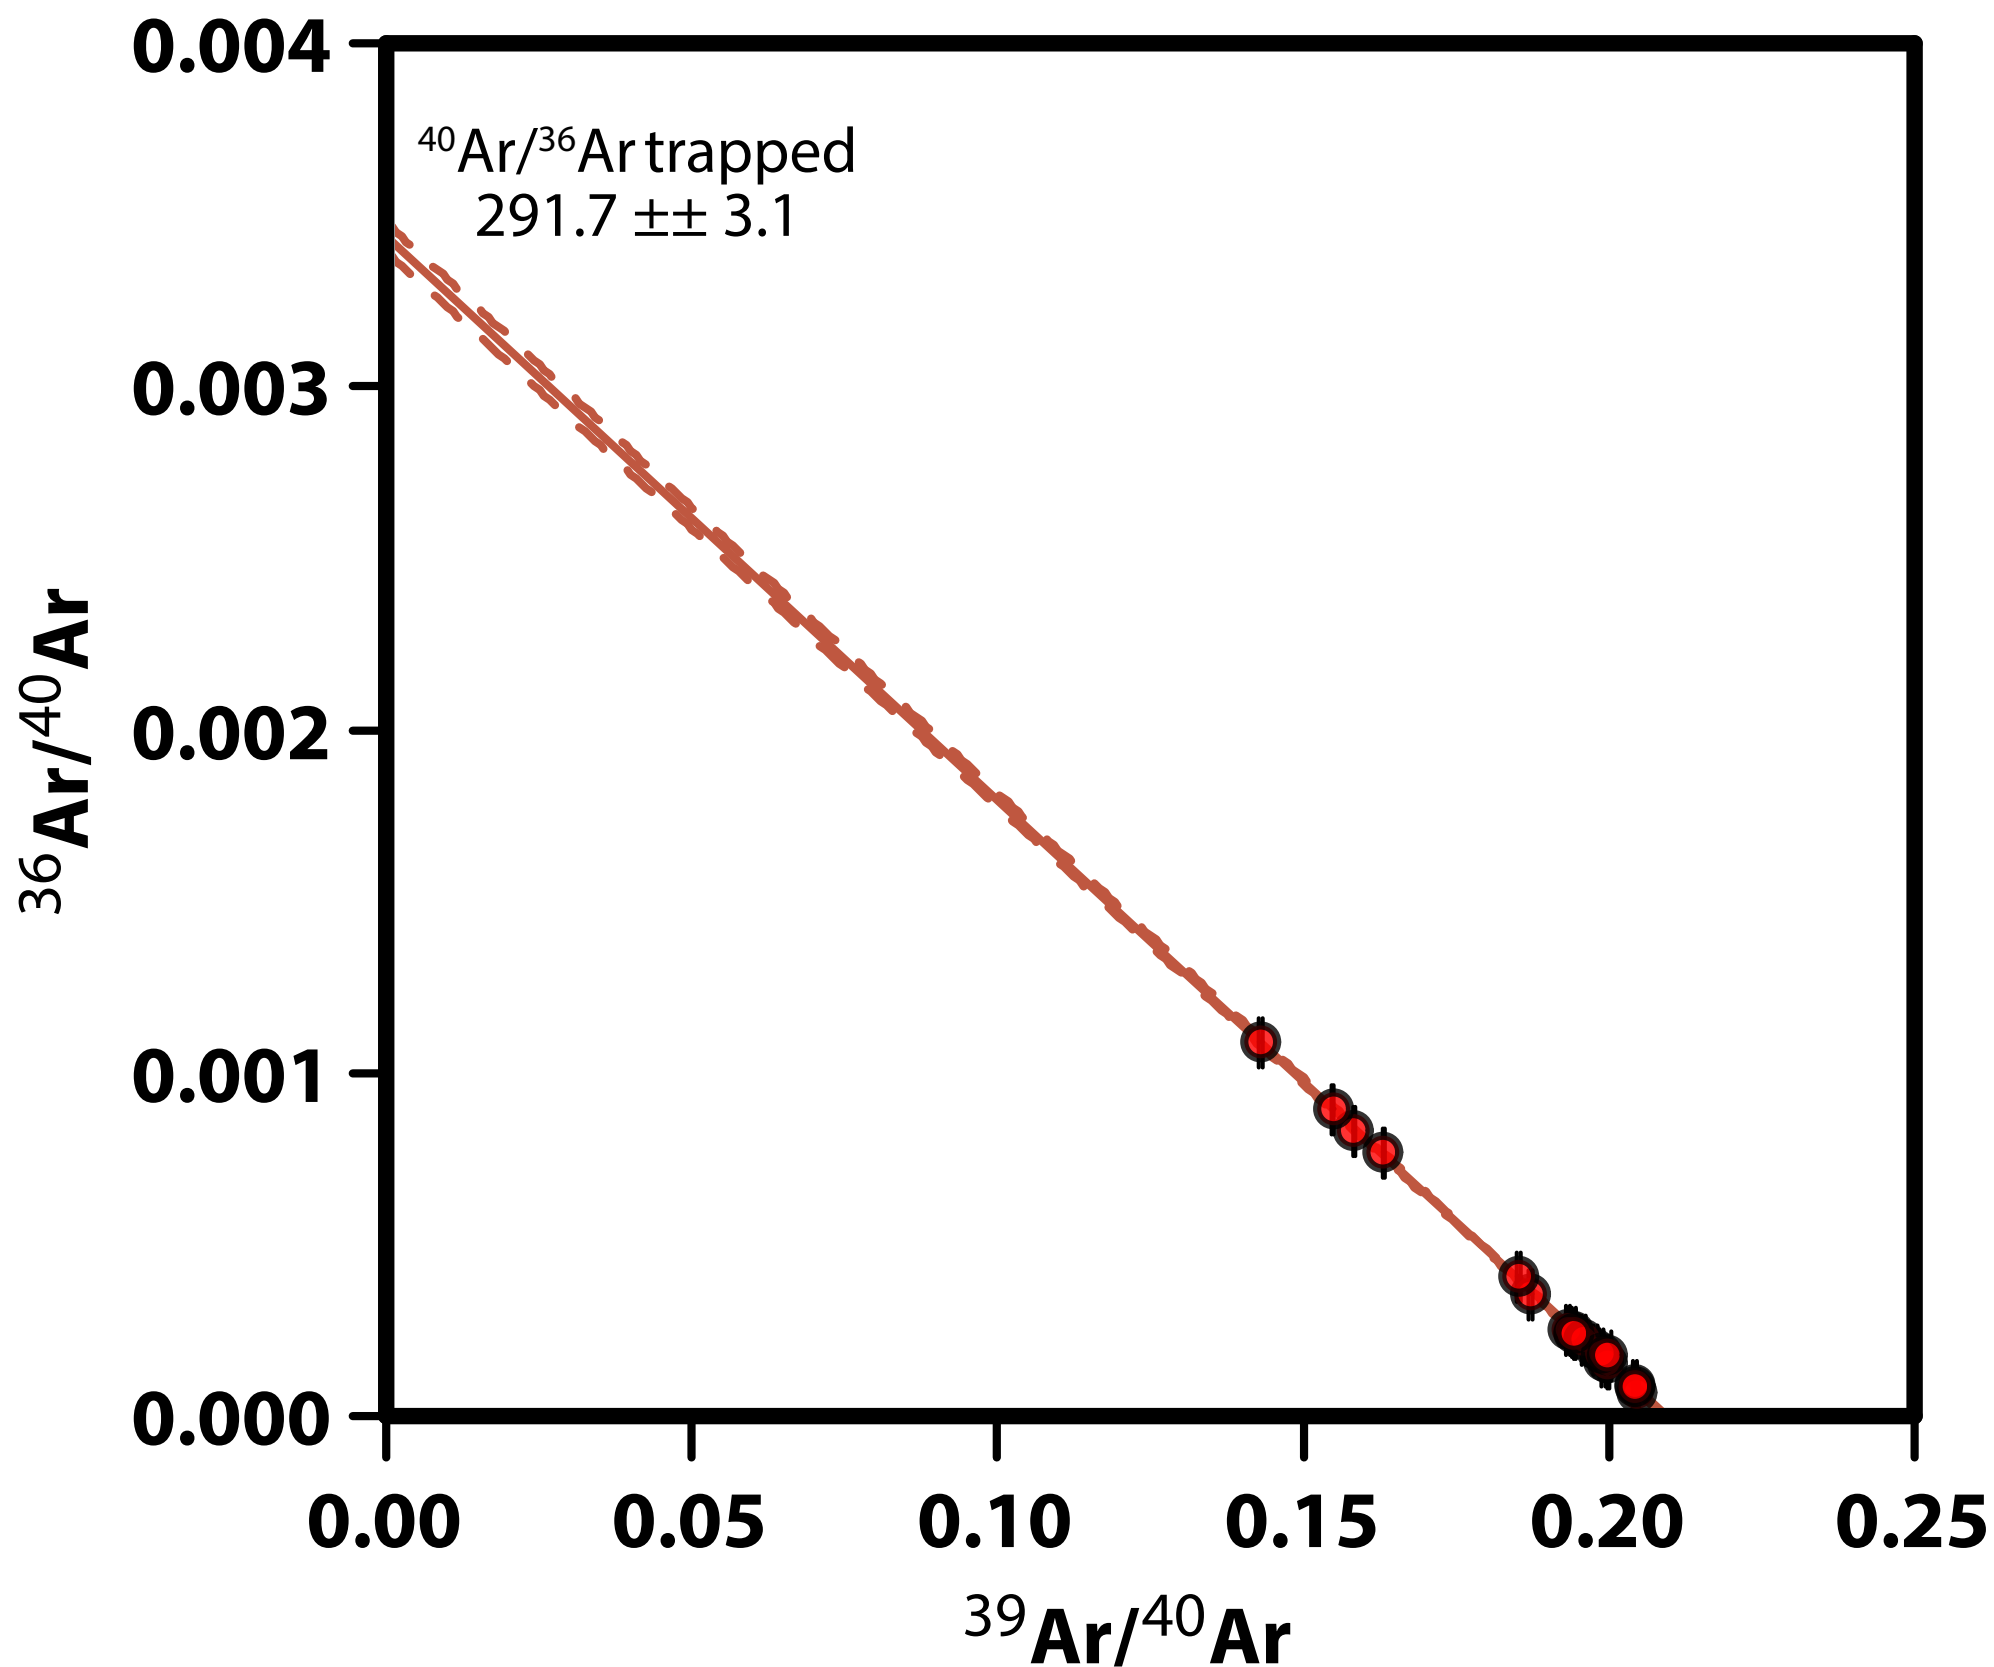

# Red Mountain rhyolite lava (TB-573)

$15.446 \pm \pm 0.019$  Ma

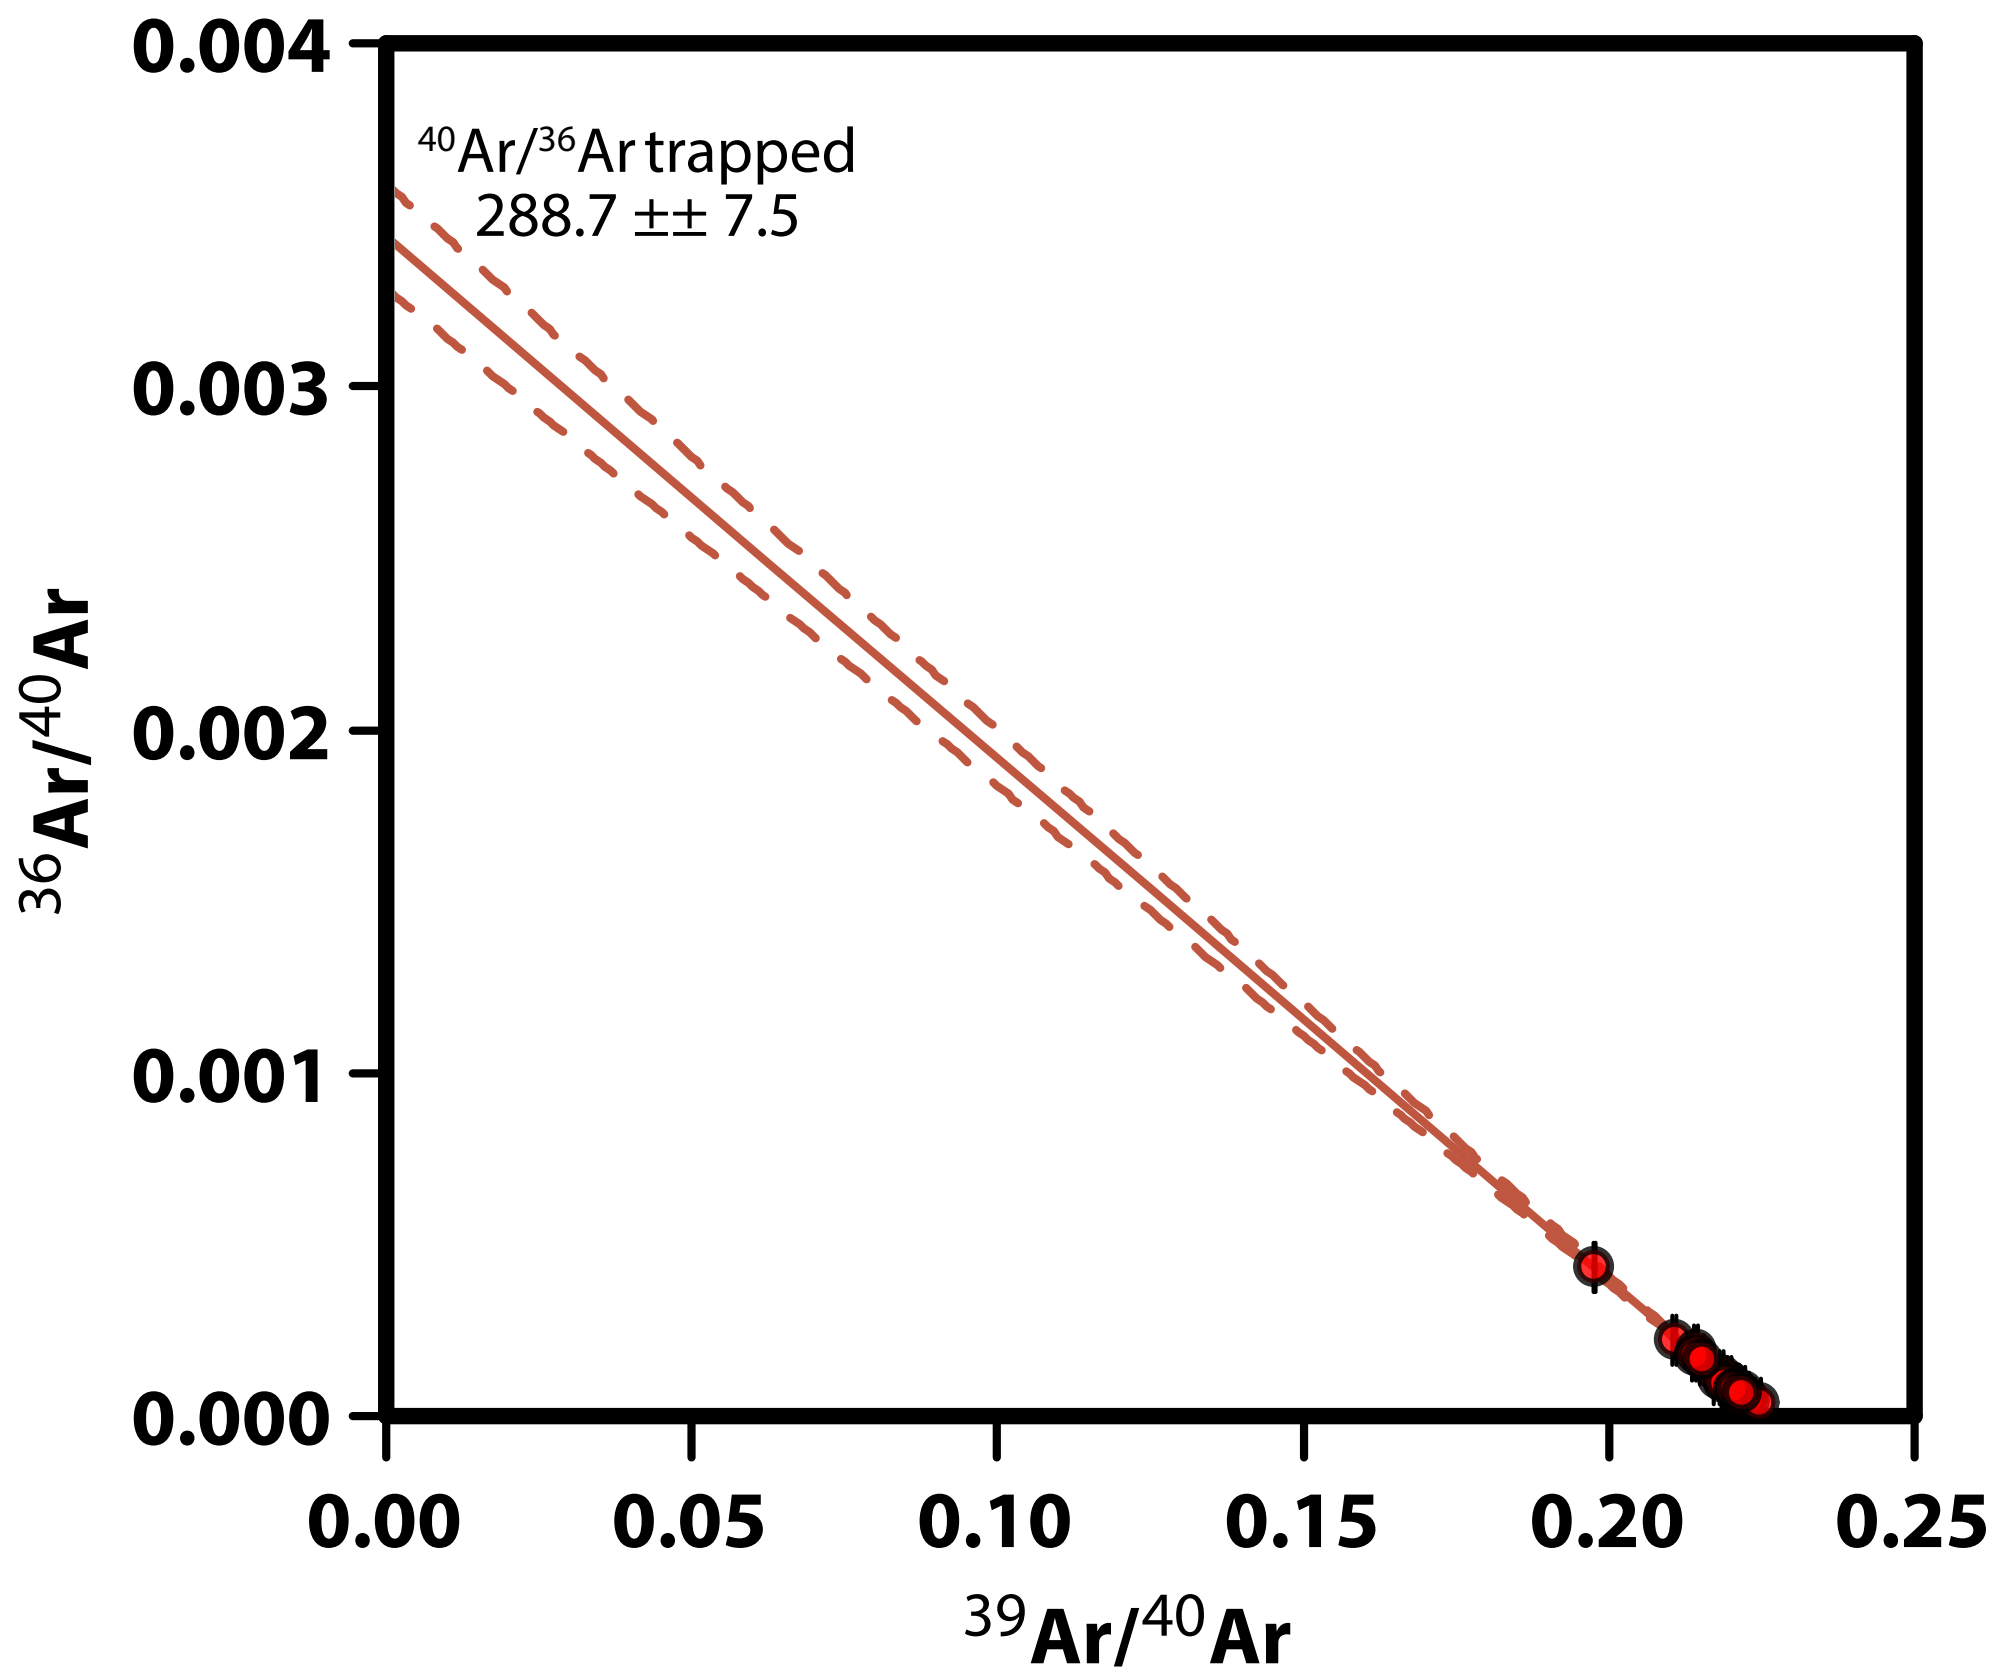

# Whitehorse Cyn rhyolite lava (TB-586)

$16.510 \pm \pm 0.022$  Ma

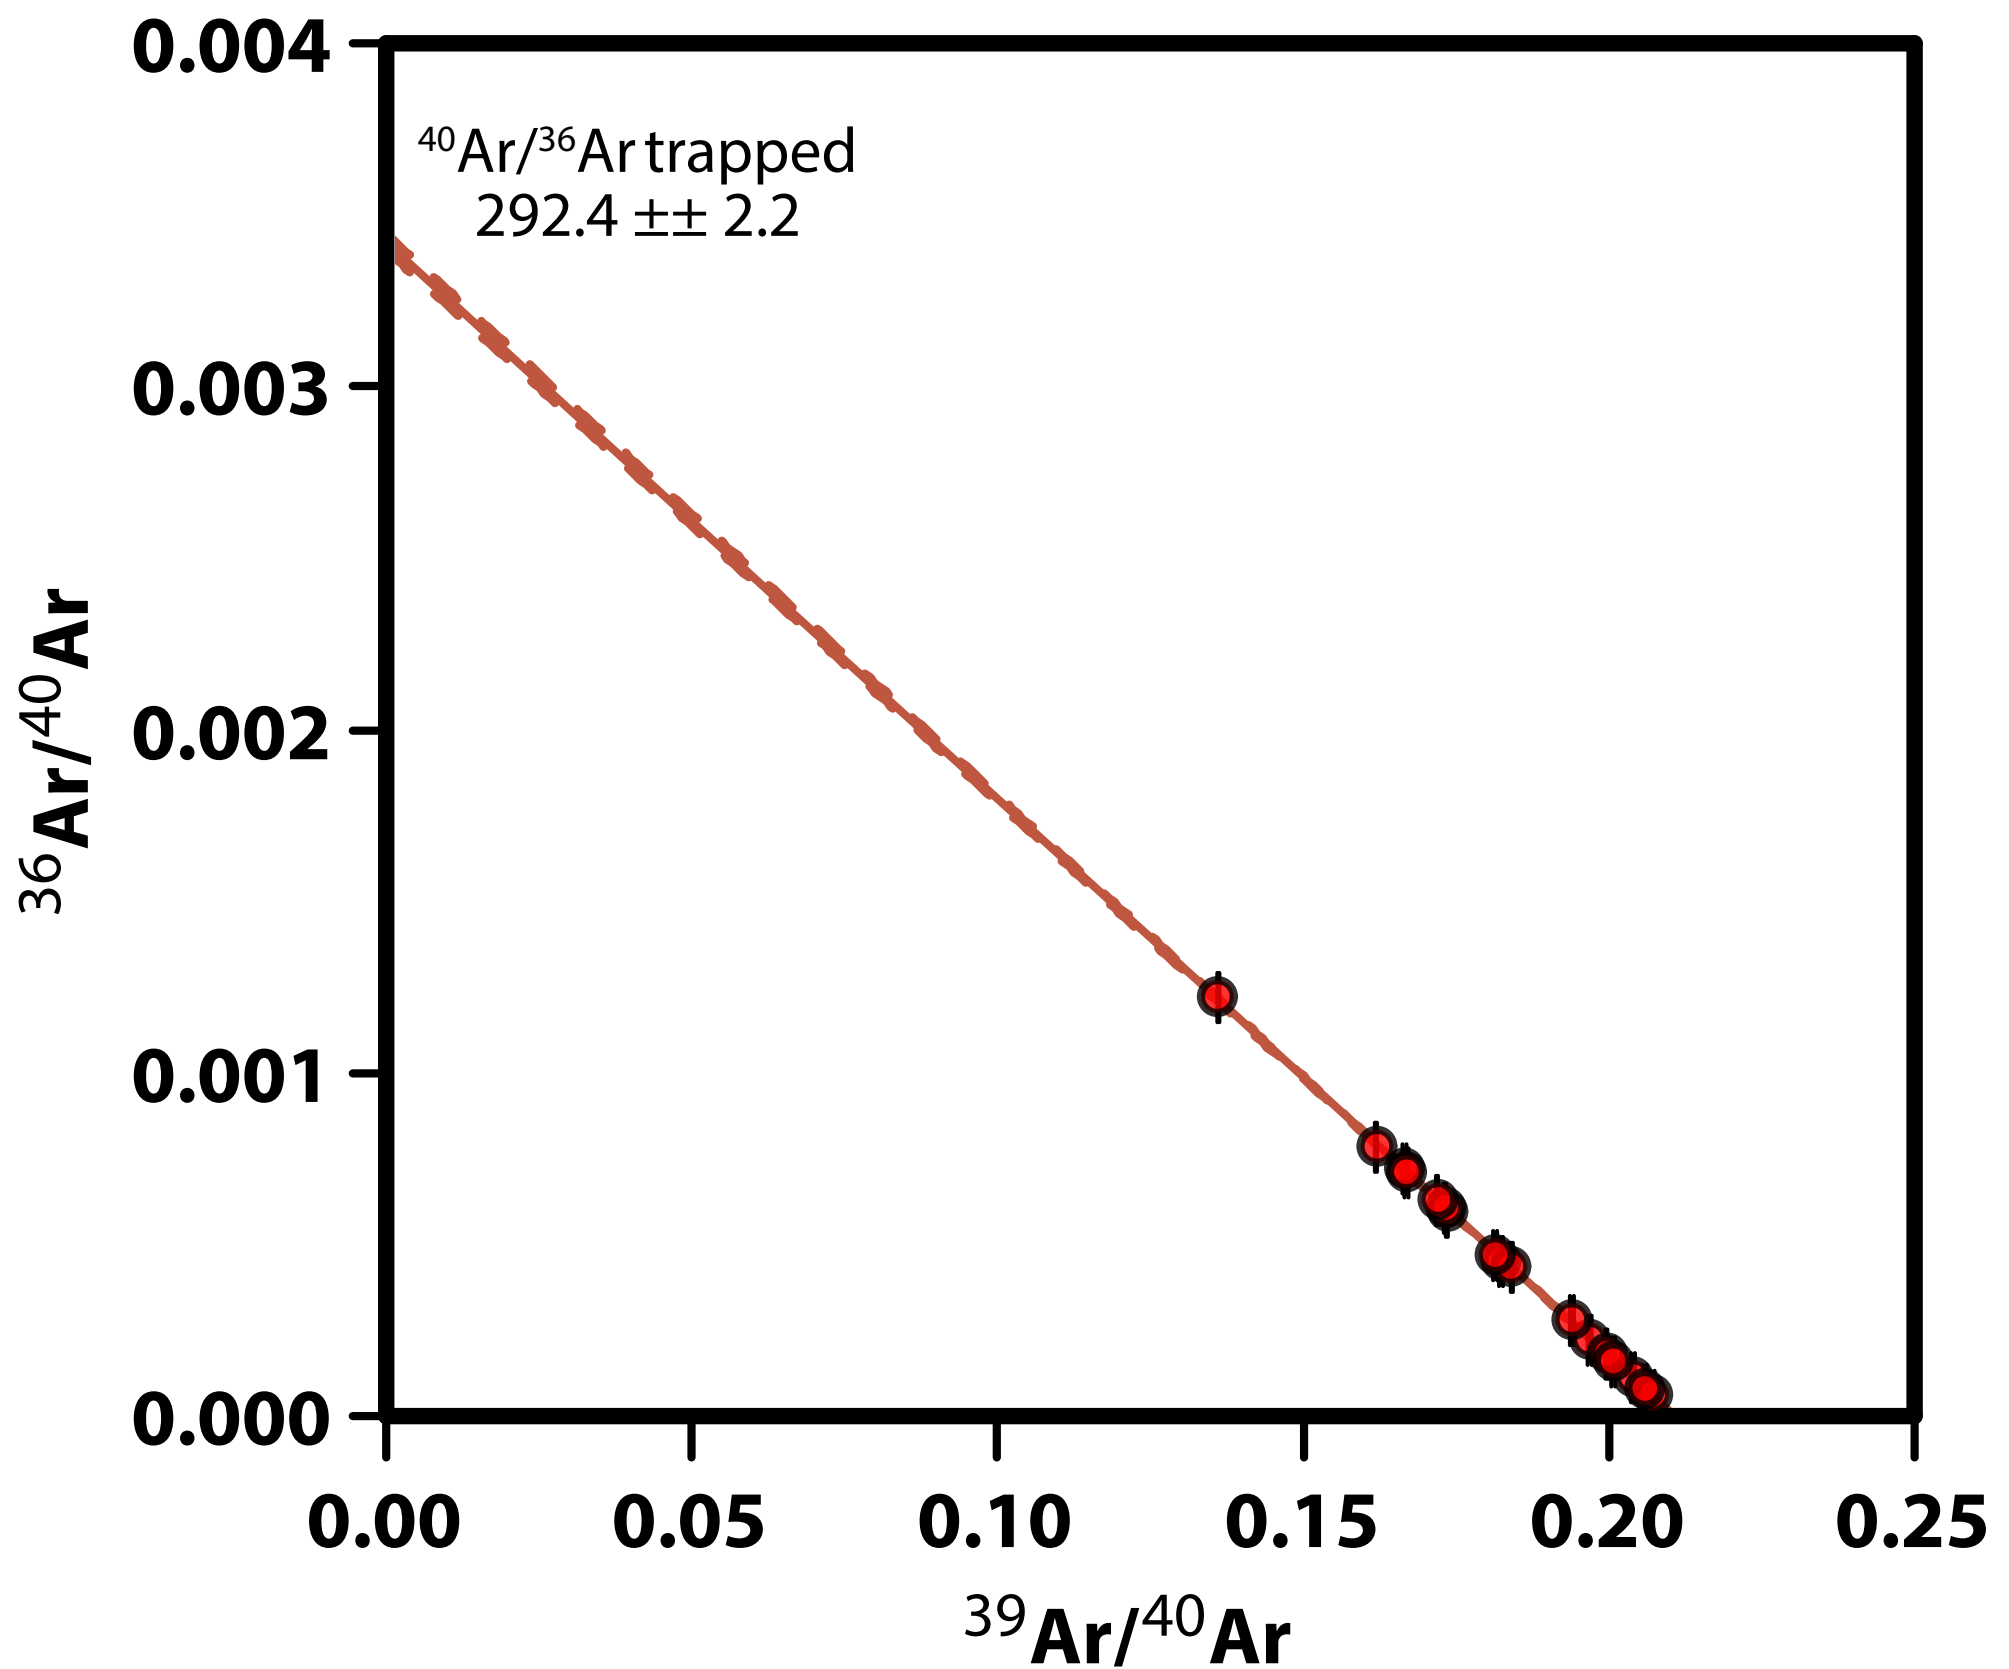

# W. Willow Creek rhyolite lava (TB-590)

$15.446 \pm \pm 0.029$  Ma

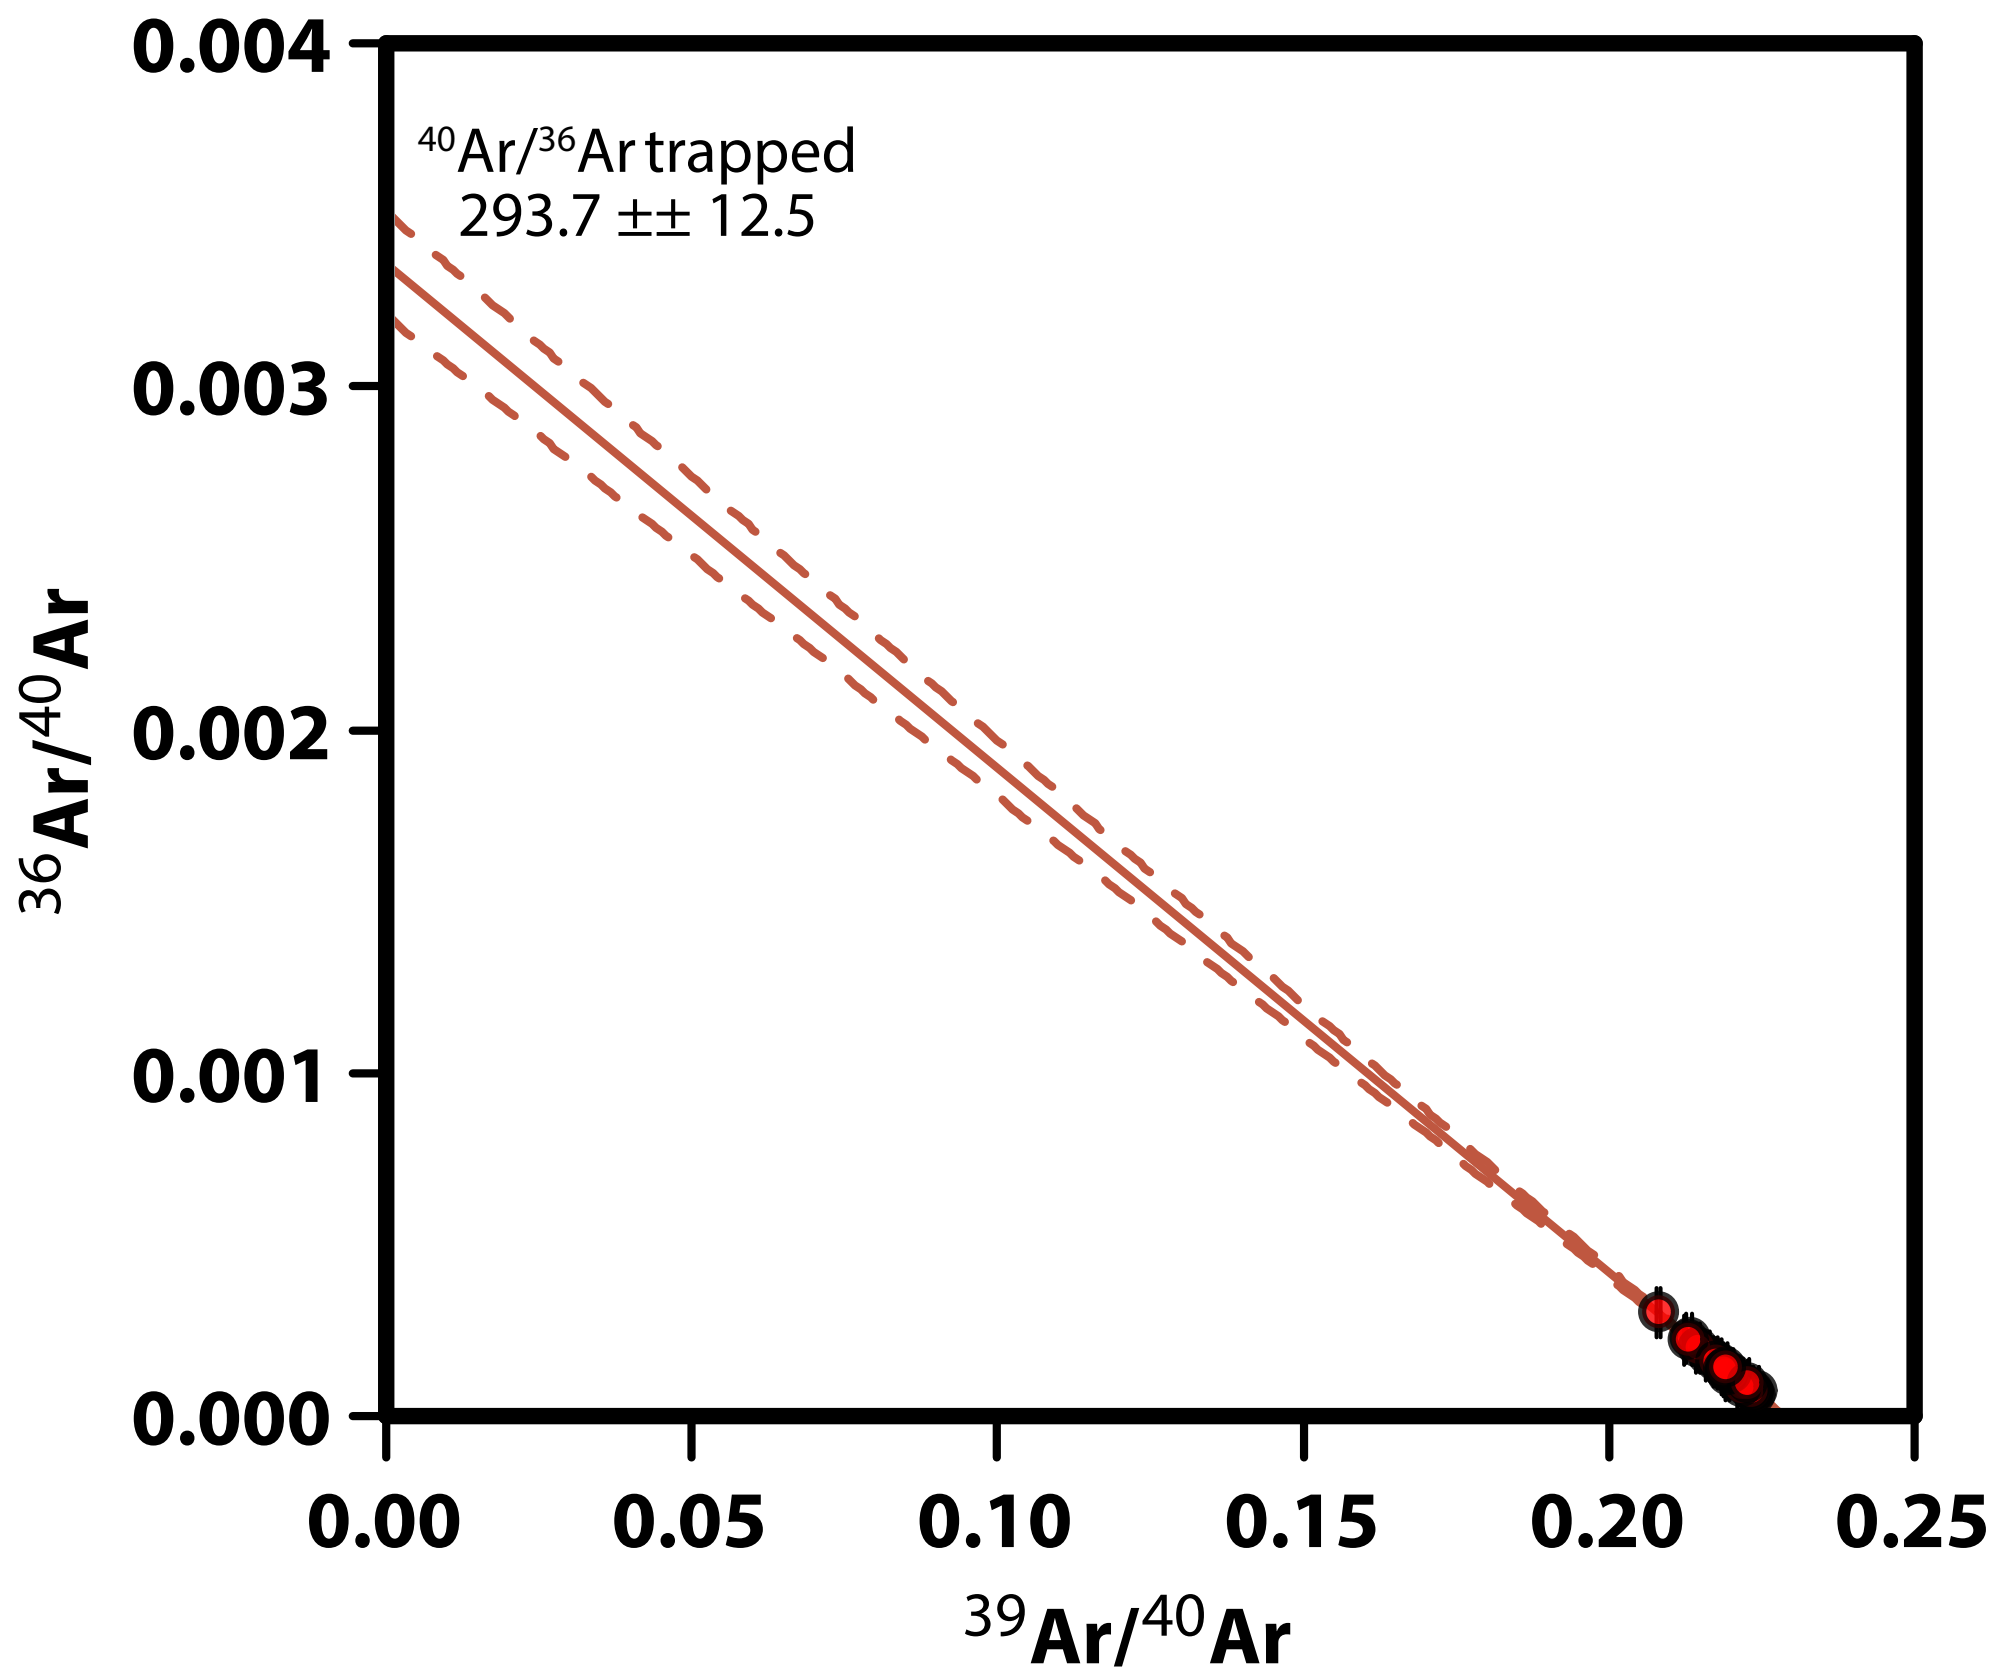

# Willow Butte rhyolite lava (TB-593)

$15.464 \pm \pm 0.027$  Ma

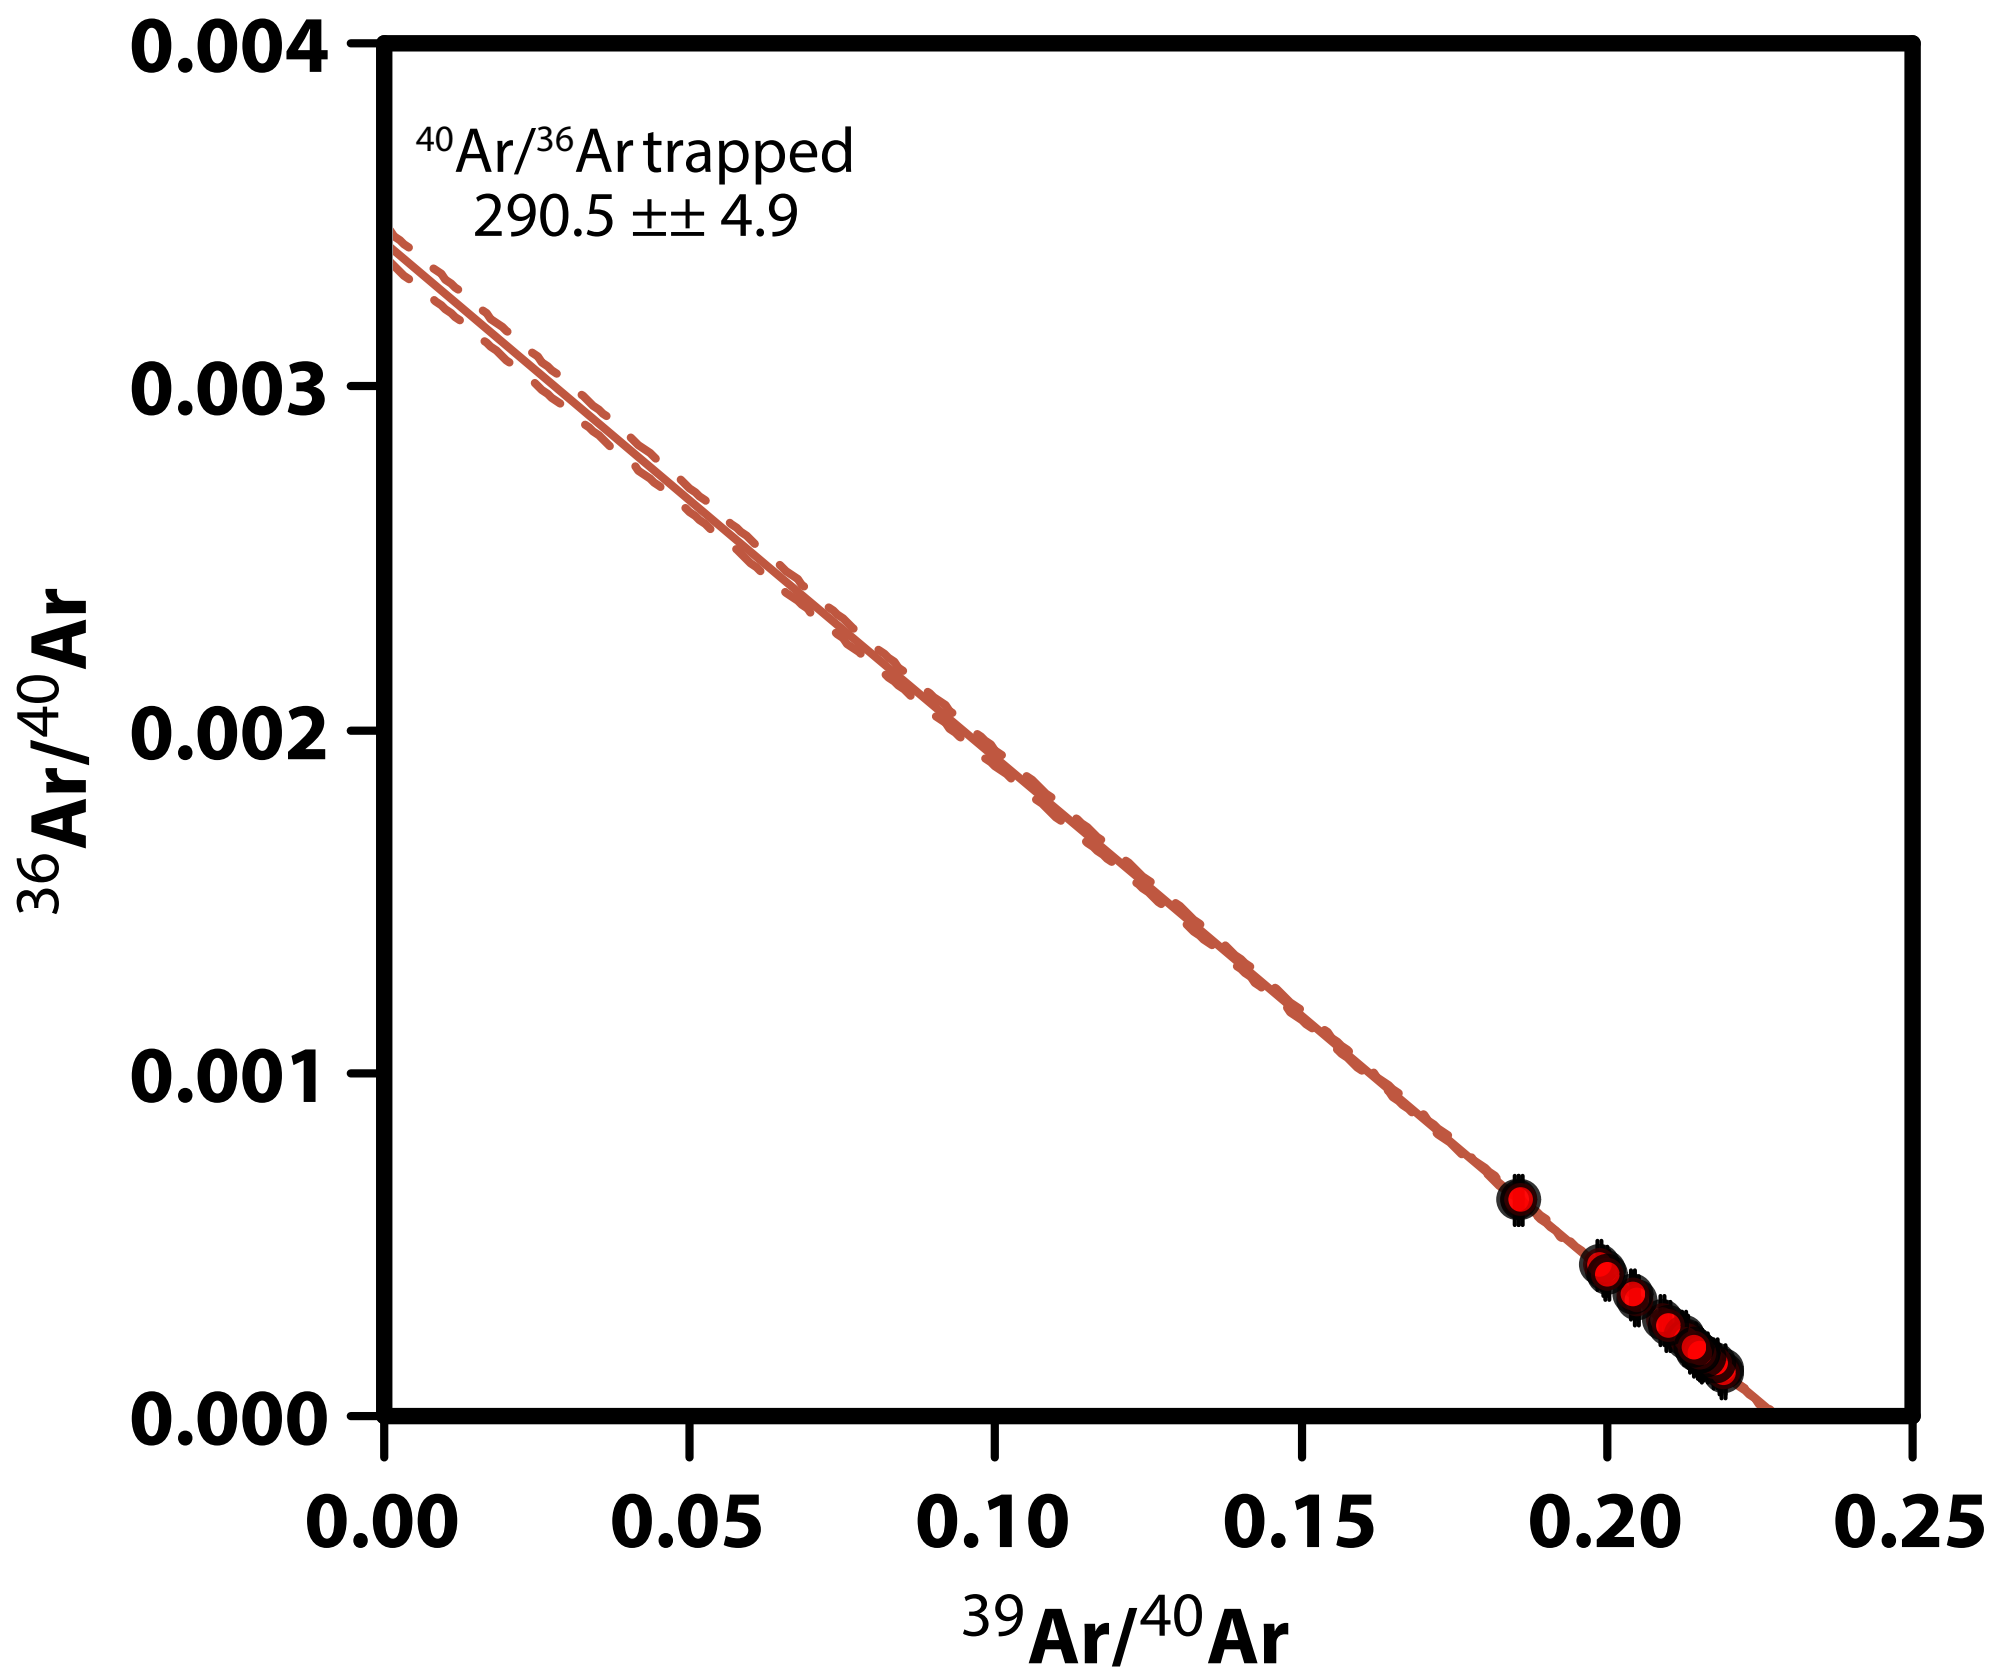

# NE campground rhyolite lava (TB-609)

15.553  $\pm$  0.032 Ma

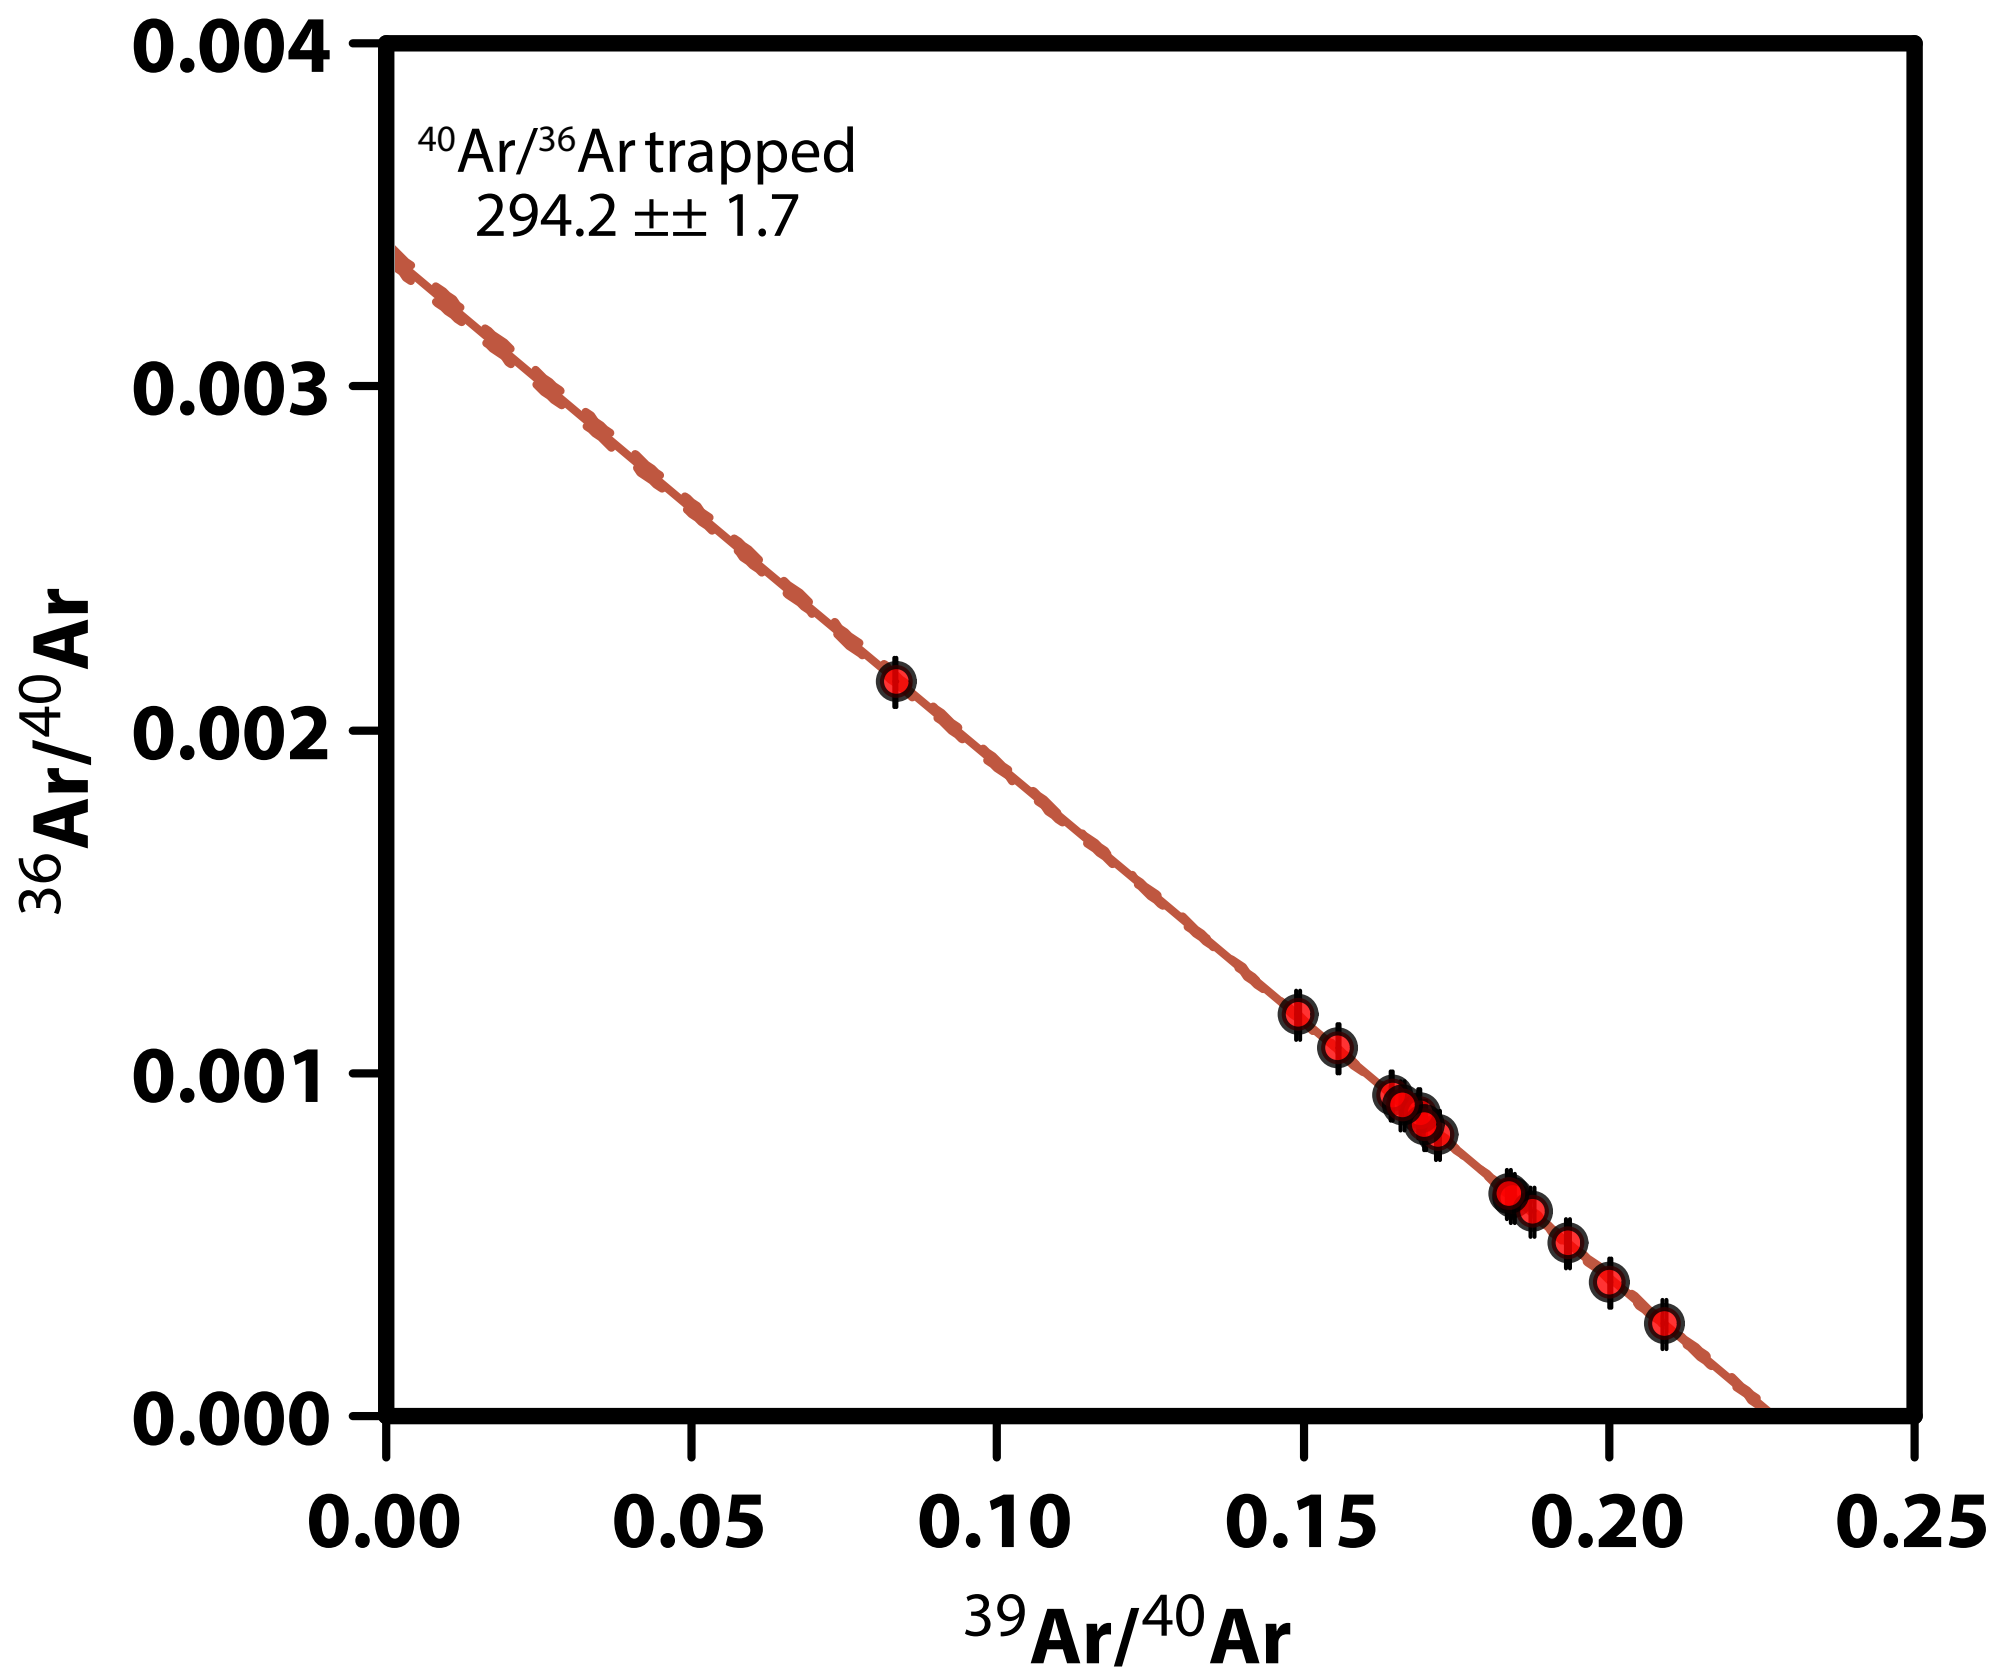



## Appendix E: Feldspar Compositions

- Tioc - Early (TB-429)
- Tioc - Mid (TB-433)
- Tioc - Late (TB-435)
- Titc - Member A (TB-439)
- Titc - Member B (TB-443)
- Tiwc (TB-322)
- Tlwh (TB-317)
- Tlto (TB-354)
- Tloo (TB-355)

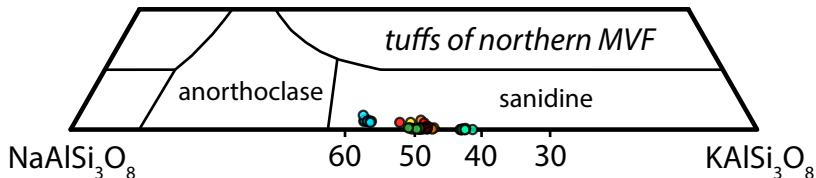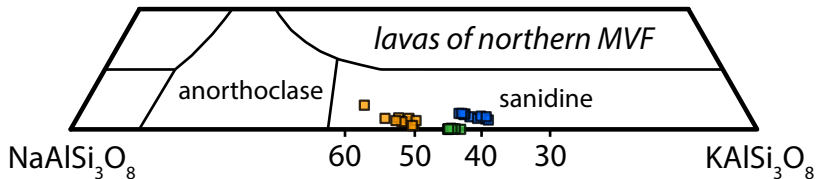

Appendix F: Representative normalized whole-rock WD-XRF analyses of volcanic rocks in McDermitt Volcanic Field

|                                 | Rhyolite Lavas                     |                             |                                          |                               |                                      | Ignimbrites           |                 |                 |                          |                 |                    |             |                          |              |  |
|---------------------------------|------------------------------------|-----------------------------|------------------------------------------|-------------------------------|--------------------------------------|-----------------------|-----------------|-----------------|--------------------------|-----------------|--------------------|-------------|--------------------------|--------------|--|
| Unit                            | Whitehorse Canyon<br>rhyolite lava | Fish Creek<br>rhyolite lava | Pole Canyon low-<br>silica rhyolite lava | Red Mountain<br>rhyolite lava | Buckskin hornblende<br>rhyolite lava | Tuff of Oregon Canyon |                 |                 | Tuff of Trout Creek Mtns |                 | Tuff of Long Ridge |             | Tuff of Whitehorse Creek |              |  |
| Map symbol                      | Tloo                               | Tlto                        | Tlty                                     | Tlwy                          | Tlwh                                 | Tioc                  | Tioc            | Tioc            | Titc                     | Titc            | Tilr               | Tilr        | Tiwc                     | Tiwc         |  |
| Description                     | pre-Tio                            | pre-Tit                     | post-Tit                                 | post-Tiw                      | post-Tiw                             | early                 | mid             | late            | Member A                 | Member B        | early              | late        | outflow                  | intracaldera |  |
| Sample #                        | TB-586*                            | TB-354                      | TB-333                                   | TB-573                        | TB-317                               | TB-429**              | TB-433          | TB-435          | TB-439                   | TB-443          | EW-210             | EW-213      | TB-322**                 | W7-466**     |  |
| Sample type                     | SL                                 | DL                          | DL                                       | DL                            | DL                                   | MWI                   | DWI             | DWI             | DWI                      | DWI             | DWI                | RI          | NWI                      | NWI          |  |
| Latitude                        | 42.23179                           | 42.28041                    | 42.18819                                 | 42.28692                      | 42.26712                             | 42.15851              | 42.15866        | 42.15867        | 42.15867                 | 42.15890        | 42.34286           | 42.34311    | 42.22749                 | 42.20448     |  |
| Longitude                       | -118.14403                         | -118.18412                  | -118.37118                               | -118.31409                    | -118.38269                           | -118.45157            | -118.45172      | -118.45187      | -118.45271               | -118.45338      | -117.88136         | -117.88191  | -118.23219               | -118.33549   |  |
| Age (Ma) + 2s err               | 16.510 ±± 0.022                    | 16.445 ±± 0.022             | ~16.4                                    | 15.446 ±± 0.019               | 15.369 ±± 0.015                      | 16.450 ±± 0.015       | 16.468 ±± 0.015 | 16.457 ±± 0.017 | 16.401 ±± 0.020          | 16.404 ±± 0.015 | 16.305 ±± 0.022    | ~16.33      | 15.559 ±± 0.044          | ~15.56       |  |
| SiO2                            | 78.80                              | 76.70                       | 71.69                                    | 75.92                         | 77.23                                | 74.92                 | 76.07           | 72.86           | 75.13                    | 74.03           | 71.93              | 74.34       | 70.89                    | 72.87        |  |
| TiO2                            | 0.16                               | 0.20                        | 0.68                                     | 0.07                          | 0.11                                 | 0.28                  | 0.16            | 0.33            | 0.23                     | 0.33            | 0.37               | 0.27        | 0.26                     | 0.16         |  |
| Al2O3                           | 10.70                              | 10.03                       | 13.91                                    | 12.57                         | 12.55                                | 11.33                 | 11.10           | 11.85           | 9.78                     | 11.47           | 12.50              | 11.78       | 14.67                    | 13.55        |  |
| Fe2O3T                          | 2.07                               | 4.42                        | 5.99                                     | 1.77                          | 0.95                                 | 3.49                  | 2.97            | 4.48            | 4.68                     | 4.33            | 4.61               | 3.65        | 3.53                     | 2.67         |  |
| MnO                             | 0.04                               | 0.04                        | 0.05                                     | 0.04                          | 0.03                                 | 0.06                  | 0.08            | 0.12            | 0.09                     | 0.08            | 0.12               | 0.11        | 0.11                     | 0.07         |  |
| MgO                             | 0.13                               | 0.10                        | 0.20                                     | 0.24                          | 0.13                                 | 0.34                  | 0.07            | 0.36            | 0.15                     | 0.35            | 0.26               | 0.10        | 0.82                     | 0.26         |  |
| CaO                             | 0.28                               | 0.19                        | 0.35                                     | 0.37                          | 0.34                                 | 0.51                  | 0.44            | 0.66            | 0.74                     | 0.37            | 0.65               | 0.36        | 1.20                     | 0.49         |  |
| Na2O                            | 3.62                               | 3.48                        | 1.31                                     | 3.72                          | 3.82                                 | 4.20                  | 4.33            | 4.44            | 4.49                     | 4.19            | 4.28               | 4.24        | 3.05                     | 3.10         |  |
| K2O                             | 4.00                               | 4.51                        | 5.29                                     | 5.11                          | 4.65                                 | 4.55                  | 4.53            | 4.64            | 4.37                     | 4.65            | 4.98               | 4.93        | 5.21                     | 6.63         |  |
| P2O5                            | 0.04                               | 0.08                        | 0.16                                     | 0.05                          | 0.05                                 | 0.09                  | 0.04            | 0.08            | 0.08                     | 0.05            | 0.11               | 0.04        | 0.07                     | 0.03         |  |
| Trace Elements                  | <u>0.16</u>                        | <u>0.24</u>                 | <u>0.37</u>                              | <u>0.14</u>                   | <u>0.13</u>                          | <u>0.23</u>           | <u>0.21</u>     | <u>0.19</u>     | <u>0.25</u>              | <u>0.14</u>     | <u>0.19</u>        | <u>0.17</u> | <u>0.20</u>              | <u>0.17</u>  |  |
| TOTAL (with Fe2O3T, TE, no LOI) | 100.00                             | 100.00                      | 100.00                                   | 100.00                        | 100.00                               | 100.00                | 100.00          | 100.00          | 100.00                   | 100.00          | 100.00             | 100.00      | 100.00                   | 100.00       |  |
| LOI                             | 1.53                               | 0.96                        | 3.35                                     | 1.14                          | 0.70                                 | 2.35                  | 0.61            | 1.71            | 1.34                     | 1.81            | 1.24               | 0.62        | 7.38                     | 5.30         |  |
| Agpaite Index: (Na+K)/Al        | 0.96                               | 1.06                        | 0.57                                     | 0.93                          | 0.90                                 | 1.04                  | 1.08            | 1.04            | 1.24                     | 1.04            | 0.99               | 1.05        | 0.73                     | 0.74         |  |
| Rb                              | 143                                | 151                         | 153                                      | 275                           | 260                                  | 170                   | 199             | 136             | 174                      | 92              | 150                | 180         | 204                      | 227          |  |
| Sr                              | 11                                 | 16                          | 41                                       | 16                            | 71                                   | 46                    | 11              | 23              | 33                       | 28              | 36                 | 15          | 79                       | 18           |  |
| Y                               | 77                                 | 175                         | 72                                       | 38                            | 44                                   | 151                   | 100             | 91              | 126                      | 66              | 81                 | 75          | 79                       | 73           |  |
| Zr                              | 522                                | 782                         | 416                                      | 374                           | 194                                  | 666                   | 729             | 482             | 757                      | 346             | 373                | 441         | 562                      | 531          |  |
| V                               | 9                                  | 26                          | 19                                       | 6                             | 6                                    | 13                    | 7               | 13              | 9                        | 16              | 19                 | 7           | 23                       | 5            |  |
| Ni                              | 4                                  | 3                           | 1                                        | 5                             | 2                                    | 3                     | 2               | 2               | 4                        | 2               | 3                  | 3           | 5                        | 2            |  |
| Cr                              | 17                                 | 11                          | 15                                       | 14                            | 12                                   | 18                    | 9               | 15              | 12                       | 13              | 14                 | 11          | 13                       | 15           |  |
| Nb                              | 30                                 | 33                          | 19                                       | 48                            | 39                                   | 33                    | 36              | 30              | 36                       | 18              | 22                 | 26          | 40                       | 37           |  |
| Ga                              | 25                                 | 34                          | 26                                       | 27                            | 23                                   | 29                    | 32              | 30              | 34                       | 31              | 27                 | 30          | 30                       | 28           |  |
| Cu                              | 10                                 | 11                          | 8                                        | 13                            | 9                                    | 10                    | 8               | 7               | 8                        | 12              | 12                 | 7           | 15                       | 10           |  |
| Zn                              | 87                                 | 172                         | 167                                      | 69                            | 17                                   | 200                   | 164             | 185             | 271                      | 139             | 144                | 152         | 114                      | 106          |  |
| Co                              | nd                                 | 1                           | 2                                        | nd                            | nd                                   | nd                    | nd              | 1               | nd                       | 1               | nd                 | nd          | 1                        | nd           |  |
| Ba                              | 117                                | 144                         | 2004                                     | 54                            | 239                                  | 180                   | 99              | 290             | 248                      | 224             | 530                | 248         | 174                      | 110          |  |
| La                              | 60                                 | 77                          | 40                                       | 38                            | 52                                   | 73                    | 78              | 54              | 69                       | 46              | 50                 | 54          | 62                       | 59           |  |
| Ce                              | 107                                | 150                         | 84                                       | 67                            | 82                                   | 126                   | 125             | 111             | 143                      | 72              | 81                 | 102         | 119                      | 108          |  |
| U                               | 5                                  | nd                          | 0                                        | 5                             | 6                                    | 4                     | nd              | nd              | 2                        | 1               | 6                  | 2           | 4                        | 4            |  |
| Th                              | 33                                 | 40                          | 22                                       | 50                            | 50                                   | 36                    | 39              | 32              | 39                       | 23              | 29                 | 32          | 36                       | 32           |  |
| Sc                              | nd                                 | nd                          | 11                                       | nd                            | nd                                   | nd                    | nd              | 3               | nd                       | nd              | 1                  | nd          | nd                       | nd           |  |
| Pb                              | 21                                 | 33                          | 24                                       | 20                            | 20                                   | 38                    | 28              | 23              | 31                       | 15              | 15                 | 20          | 13                       | 29           |  |

SL = silicified lava; DL = devitrified lava; NWI = non-welded ignimbrite; MWI = moderately welded ignimbrite; DWI = densely welded ignimbrite

\* silicified sample; SiO2 concentration too high

\*\*samples that likely lost alkalis on alteration

| Sample #      | TB-435 |        |              | TB-443 |        |              | EW-210 |        |              | TB-322 |        |              |
|---------------|--------|--------|--------------|--------|--------|--------------|--------|--------|--------------|--------|--------|--------------|
|               | WD-XRF | ED-XRF | % difference |
| TiO2 (wt %)   | 0.33   | 0.38   | 0.15         | 0.33   | 0.37   | 0.13         | 0.37   | 0.36   | -0.03        | 0.26   | 0.26   | 0.00         |
| Fe2O3T (wt %) | 4.48   | 4.38   | -0.02        | 4.33   | 4.18   | -0.04        | 4.61   | 4.41   | -0.04        | 3.53   | 3.28   | -0.07        |
| MnO (wt. %)   | 0.12   | 0.11   | -0.08        | 0.08   | 0.07   | -0.12        | 0.12   | 0.15   | 0.25         | 0.11   | 0.07   | -0.36        |
| CaO (wt. %)   | 0.66   | 0.52   | -0.21        | 0.37   | 0.37   | 0.00         | 0.65   | 0.39   | -0.40        | 1.20   | 1.25   | 0.04         |
| Rb (ppm)      | 136    | 150    | 0.10         | 92     | 100    | 0.08         | 150    | 163    | 0.08         | 204    | 194    | -0.05        |
| Sr (ppm)      | 23     | 19     | -0.19        | 28     | 22     | -0.20        | 36     | 28     | -0.21        | 79     | 68     | -0.13        |
| Y (ppm)       | 91     | 58     | -0.36        | 66     | 44     | -0.33        | 81     | 36     | -0.56        | 79     | 54     | -0.32        |
| Zr (ppm)      | 482    | 429    | -0.11        | 346    | 339    | -0.02        | 373    | 363    | -0.03        | 562    | 547    | -0.03        |
| Nb (ppm)      | 30     | 27     | -0.10        | 18     | 19     | 0.07         | 22     | 21     | -0.08        | 40     | 40     | -0.01        |
| Ga (ppm)      | 30     | 26     | -0.11        | 31     | 26     | -0.14        | 27     | 24     | -0.11        | 30     | 25     | -0.16        |
| Cu (ppm)      | 7      | 8      | 0.17         | 12     | 9      | -0.24        | 12     | 11     | -0.10        | 15     | 14     | -0.09        |
| Zn (ppm)      | 185    | 189    | 0.02         | 139    | 133    | -0.04        | 144    | 120    | -0.17        | 114    | 111    | -0.03        |
| Ba (ppm)      | 290    | 267    | -0.08        | 224    | 208    | -0.07        | 530    | 739    | 0.40         | 174    | 103    | -0.41        |
| La (ppm)      | 54     | 52     | -0.04        | 46     | 32     | -0.30        | 50     | 36     | -0.28        | 62     | 49     | -0.21        |
| Ce (ppm)      | 111    | 116    | 0.05         | 72     | 71     | -0.02        | 81     | 100    | 0.24         | 119    | 114    | -0.04        |
| Th (ppm)      | 32     | 15     | -0.54        | 23     | 10     | -0.59        | 29     | 18     | -0.39        | 36     | 19     | -0.48        |
| U (ppm)       | nd     | 4      | na           | 1      | 3      | 1.46         | 6      | 7      | 0.14         | 4      | 4      | -0.03        |

Appendix H: Mafic EDXRF Data

|                                                                         |           |            | P2O5    | K2O     | CaO     | TiO2    | V     | Cr    | FeO*    | Ni    | Cu    | Zn    | Sr    | Y     | Zr    | Nb    | Ba    | Ce    |
|-------------------------------------------------------------------------|-----------|------------|---------|---------|---------|---------|-------|-------|---------|-------|-------|-------|-------|-------|-------|-------|-------|-------|
| Latitude                                                                | Longitude |            | (wt. %) | (wt. %) | (wt. %) | (wt. %) | (ppm) | (ppm) | (wt. %) | (ppm) |
| <i>Steens Basalt - Oregon Canyon Mountains (Tbs)</i>                    |           |            |         |         |         |         |       |       |         |       |       |       |       |       |       |       |       |       |
| TB-446                                                                  | 42.26024  | -118.00708 | 0.48    | 2.42    | 6.86    | 2.18    | 287   |       | 8.50    | 32    | 28    | 117   | 507   | 41    | 197   | 13    | 1,642 | 61    |
| TB-447                                                                  | 42.25876  | -118.00734 | 0.46    | 2.05    | 6.60    | 2.35    | 430   | 2     | 12.45   | 47    | 70    | 125   | 495   | 39    | 183   | 12    | 931   | 57    |
| TB-448                                                                  | 42.25782  | -118.00902 | 0.31    | 0.93    | 9.79    | 2.08    | 324   | 61    | 9.84    | 58    | 86    | 99    | 428   | 34    | 167   | 14    | 361   | 30    |
| ML-221                                                                  | 42.26250  | -118.00348 | 0.28    | 0.72    | 9.84    | 2.39    | 354   | 62    | 10.59   | 56    | 96    | 107   | 432   | 36    | 164   | 14    | 399   | 47    |
| MW-110                                                                  | 42.26068  | -118.00259 | 0.46    | 1.59    | 7.21    | 2.97    | 349   | 23    | 12.46   | 39    | 77    | 137   | 354   | 53    | 262   | 20    | 857   | 66    |
| <i>Trachyandesite and Trachyte lavas - Oregon Canyon Mountains (Tt)</i> |           |            |         |         |         |         |       |       |         |       |       |       |       |       |       |       |       |       |
| TB-356                                                                  | 42.23918  | -118.15802 | 0.73    | 3.71    | 3.89    | 1.46    | 70    | 5     | 8.16    | 24    | 22    | 131   | 291   | 55    | 288   | 20    | 1,769 | 82    |
| TB-449                                                                  | 42.25781  | -118.00923 | 0.11    | 4.87    | 1.72    | 0.75    |       | 3     | 3.60    | 19    | 9     | 88    | 181   | 55    | 296   | 17    | 1,733 | 84    |
| TB-450                                                                  | 42.25587  | -118.01427 | 0.43    | 2.97    | 5.23    | 2.41    | 277   |       | 10.89   | 25    | 20    | 139   | 336   | 52    | 267   | 20    | 1,240 | 89    |
| TB-491                                                                  | 42.23842  | -118.12688 | 0.12    | 5.11    | 1.38    | 0.55    |       | 2     | 3.23    | 20    | 13    | 91    | 119   | 60    | 355   | 19    | 1,743 | 98    |
| TB-579                                                                  | 42.33645  | -118.14164 | 1.41    | 2.82    | 5.45    | 2.22    | 194   |       | 8.62    | 30    | 23    | 133   | 386   | 56    | 276   | 20    | 1,811 | 90    |
| TB-585                                                                  | 42.22218  | -118.14249 | 0.70    | 3.41    | 4.09    | 1.39    | 73    | 5     | 8.65    | 24    | 25    | 151   | 303   | 56    | 281   | 21    | 1,830 | 85    |
| TB-610                                                                  | 42.43547  | -117.82705 | 0.27    | 3.61    | 2.62    | 0.77    |       | 1     | 5.55    | 21    | 13    | 115   | 203   | 62    | 320   | 23    | 1,163 | 115   |
| EW-200                                                                  | 42.33189  | -117.87966 | 0.21    | 3.91    | 3.33    | 1.11    | 10    | 4     | 8.38    | 25    | 32    | 136   | 174   | 55    | 313   | 21    | 1,549 | 85    |
| ML-204                                                                  | 42.30561  | -117.85941 | 0.05    | 5.86    | 1.56    | 0.49    | 1     | 2     | 4.89    | 20    | 11    | 139   | 18    | 57    | 333   | 24    | 481   | 93    |
| ML-210                                                                  | 42.34215  | -117.96302 | 0.21    | 3.80    | 3.87    | 1.09    | 14    | 3     | 7.25    | 25    | 30    | 136   | 195   | 57    | 321   | 22    | 1,546 | 86    |
| ML-222                                                                  | 42.29997  | -117.85814 | 0.63    | 3.30    | 4.56    | 1.72    | 185   | 3     | 9.18    | 26    | 47    | 126   | 261   | 63    | 382   | 25    | 1,006 | 96    |
| ML-223                                                                  | 42.30775  | -117.86127 | 0.11    | 6.04    | 1.58    | 0.49    |       | 3     | 5.31    | 21    | 14    | 134   | 20    | 56    | 326   | 23    | 526   | 87    |
| ML-224                                                                  | 42.30970  | -117.86832 | 0.29    | 4.34    | 1.75    | 0.81    | 7     | 5     | 6.86    | 24    | 27    | 124   | 130   | 62    | 332   | 22    | 1,093 | 87    |
| ML-225                                                                  | 42.30889  | -117.86700 | 0.37    | 4.39    | 3.14    | 0.93    |       | 6     | 8.03    | 25    | 26    | 133   | 152   | 51    | 291   | 20    | 1,677 | 79    |
| ML-226                                                                  | 42.30889  | -117.86700 | 0.95    | 3.42    | 3.48    | 1.37    | 42    | 7     | 9.24    | 26    | 29    | 119   | 306   | 53    | 292   | 20    | 2,122 | 77    |
| ML-227                                                                  | 42.31396  | -117.87068 | 0.16    | 5.51    | 1.96    | 0.61    |       | 4     | 5.56    | 22    | 19    | 133   | 52    | 55    | 311   | 22    | 901   | 94    |
| ML-228                                                                  | 42.31760  | -117.87489 | 0.33    | 4.17    | 2.81    | 0.89    | 23    | 3     | 7.09    | 25    | 29    | 129   | 139   | 59    | 338   | 22    | 1,096 | 91    |
| ML-236                                                                  | 42.14196  | -118.17483 | 0.25    | 4.32    | 2.08    | 0.84    |       | 4     | 4.25    | 20    | 14    | 91    | 237   | 49    | 272   | 16    | 1,911 | 74    |
| <i>Steens Basalt - Trout Creek Mountains (Tbs)</i>                      |           |            |         |         |         |         |       |       |         |       |       |       |       |       |       |       |       |       |
| TB-379                                                                  | 42.17482  | -118.37179 | 1.07    | 1.60    | 8.46    | 1.87    | 321   | 19    | 11.02   | 70    | 197   | 100   | 560   | 37    | 181   | 14    | 592   | 54    |
| TB-466                                                                  | 42.17681  | -118.36623 | 0.98    | 2.21    | 7.02    | 2.42    | 309   |       | 10.94   | 41    | 174   | 118   | 476   | 44    | 227   | 17    | 845   | 58    |
| TB-472                                                                  | 42.16414  | -118.33920 | 1.11    | 2.51    | 6.05    | 2.71    | 229   |       | 10.38   | 29    | 30    | 131   | 436   | 51    | 272   | 19    | 924   | 76    |

|         |          |            |      |      |      |      |     |     |       |     |     |     |     |    |     |    |     |    |
|---------|----------|------------|------|------|------|------|-----|-----|-------|-----|-----|-----|-----|----|-----|----|-----|----|
| ML-230A | 42.05251 | -118.43543 | 0.88 | 0.97 | 8.56 | 2.80 | 396 | 16  | 12.10 | 78  | 238 | 117 | 541 | 38 | 197 | 14 | 479 | 49 |
| ML-230B | 42.05251 | -118.43543 | 1.00 | 1.43 | 8.34 | 2.05 | 368 | 36  | 11.23 | 86  | 203 | 100 | 501 | 37 | 179 | 13 | 468 | 44 |
| ML-231  | 42.05297 | -118.43435 | 0.78 | 1.01 | 9.62 | 2.07 | 356 | 24  | 10.05 | 71  | 174 | 95  | 630 | 30 | 144 | 11 | 429 | 42 |
| ML-232  | 42.05343 | -118.43355 | 0.41 | 0.63 | 9.56 | 1.32 | 291 | 125 | 10.75 | 154 | 137 | 84  | 443 | 23 | 96  | 8  | 244 | 18 |
| ML-233  | 42.05414 | -118.43273 | 1.25 | 2.22 | 6.91 | 2.57 | 301 |     | 10.46 | 33  | 160 | 116 | 447 | 49 | 264 | 18 | 802 | 73 |

*Trachyandesite and Trachyte lavas - Trout Creek Mountains (Tt)*

|        |          |            |      |      |      |      |     |   |       |    |    |     |     |    |     |    |       |    |
|--------|----------|------------|------|------|------|------|-----|---|-------|----|----|-----|-----|----|-----|----|-------|----|
| TB-336 | 42.16788 | -118.45070 | 1.10 | 2.23 | 6.59 | 2.49 | 244 |   | 10.08 | 29 | 58 | 124 | 448 | 49 | 266 | 18 | 871   | 78 |
| TB-340 | 42.17198 | -118.45510 | 0.33 | 3.45 | 1.90 | 0.72 |     | 3 | 5.69  | 18 | 11 | 104 | 273 | 61 | 282 | 17 | 1,960 | 78 |
| TB-378 | 42.16556 | -118.37679 | 0.28 | 3.81 | 1.90 | 0.85 |     | 2 | 6.09  | 24 | 16 | 122 | 313 | 64 | 327 | 19 | 2,940 | 75 |
| TB-477 | 42.17013 | -118.31868 | 0.33 | 3.43 | 2.43 | 0.84 |     | 4 | 6.29  | 20 | 20 | 130 | 296 | 62 | 326 | 20 | 2,220 | 85 |
| TB-479 | 42.17239 | -118.30889 | 0.28 | 3.76 | 2.22 | 0.83 |     | 2 | 5.77  | 22 | 14 | 126 | 312 | 64 | 326 | 20 | 2,164 | 87 |
| TB-480 | 42.18002 | -118.29601 | 0.11 | 4.98 | 0.75 | 0.57 |     | 2 | 4.89  | 20 | 13 | 96  | 44  | 34 | 247 | 16 | 2,440 | 52 |
| TB-481 | 42.17801 | -118.29655 | 0.30 | 3.85 | 2.11 | 0.82 |     | 2 | 6.03  | 24 | 11 | 126 | 308 | 58 | 324 | 19 | 2,126 | 83 |
| TB-494 | 42.23647 | -118.12156 | 1.67 | 2.84 | 5.32 | 1.75 | 80  |   | 8.06  | 24 | 14 | 109 | 527 | 50 | 219 | 13 | 1,948 | 73 |
| TB-602 | 42.07038 | -118.22844 | 0.52 | 3.38 | 3.05 | 1.05 | 40  | 1 | 5.73  | 22 | 32 | 90  | 356 | 44 | 260 | 16 | 1,200 | 70 |
| ML-234 | 42.05476 | -118.43116 | 0.78 | 3.49 | 3.17 | 1.52 |     | 6 | 6.75  | 24 | 20 | 125 | 394 | 49 | 247 | 16 | 2,532 | 76 |
| ML-301 | 42.16754 | -118.45141 | 0.49 | 3.62 | 2.97 | 1.28 | 22  |   | 6.29  | 23 | 21 | 135 | 375 | 54 | 316 | 18 | 1,103 | 76 |
| ML-303 | 42.16832 | -118.45245 | 0.79 | 3.77 | 3.49 | 1.54 | 15  | 5 | 6.41  | 17 | 19 | 111 | 410 | 50 | 247 | 16 | 2,315 | 74 |
| ML-305 | 42.03152 | -118.32048 | 0.78 | 3.70 | 3.66 | 1.52 | 6   | 5 | 6.75  | 19 | 19 | 117 | 414 | 53 | 245 | 15 | 2,358 | 76 |

*Tule Rims trachybasaltic andesite (Ttrtr)*

|        |          |            |      |      |      |      |     |    |       |    |    |    |     |    |     |    |       |    |
|--------|----------|------------|------|------|------|------|-----|----|-------|----|----|----|-----|----|-----|----|-------|----|
| TB-562 | 42.31385 | -118.37231 | 0.66 | 1.66 | 7.18 | 1.94 | 314 | 9  | 11.56 | 50 | 53 | 97 | 495 | 32 | 114 | 10 | 825   | 28 |
| TB-565 | 42.30960 | -118.43922 | 0.56 | 2.44 | 6.06 | 1.37 | 187 | 12 | 8.48  | 50 | 38 | 87 | 484 | 33 | 145 | 12 | 1,095 | 52 |
| TB-570 | 42.33042 | -118.36742 | 0.76 | 2.83 | 5.74 | 1.31 | 182 | 8  | 9.06  | 51 | 60 | 84 | 589 | 39 | 206 | 16 | 638   | 79 |

*Postcaldera basalts (Tbc)*

|         |          |            |      |      |      |      |     |    |       |     |     |     |     |    |     |    |       |    |
|---------|----------|------------|------|------|------|------|-----|----|-------|-----|-----|-----|-----|----|-----|----|-------|----|
| TB-332  | 42.18886 | -118.36902 | 0.56 | 0.42 | 9.09 | 1.47 | 281 | 26 | 12.75 | 138 | 131 | 82  | 299 | 23 | 61  | 8  | 240   | 12 |
| TB-471  | 42.17630 | -118.34186 | 0.48 | 1.22 | 8.63 | 1.44 | 253 | 22 | 11.56 | 113 | 127 | 80  | 348 | 35 | 92  | 9  | 357   | 19 |
| TB-501A | 42.20037 | -118.33810 | 0.66 | 2.27 | 5.30 | 2.12 | 194 |    | 8.46  | 26  | 23  | 113 | 514 | 48 | 169 | 18 | 921   | 61 |
| TB-501B | 42.20037 | -118.33810 | 0.69 | 2.40 | 5.41 | 2.05 | 222 |    | 8.59  | 26  | 24  | 113 | 503 | 48 | 168 | 18 | 955   | 62 |
| TB-552  | 42.23013 | -118.38531 | 1.04 | 1.53 | 7.71 | 2.75 | 286 |    | 13.26 | 37  | 37  | 120 | 769 | 39 | 160 | 18 | 1,429 | 47 |
| TB-568  | 42.34891 | -118.40040 | 1.18 | 1.86 | 6.88 | 2.11 | 229 | 10 | 11.13 | 43  | 49  | 94  | 512 | 38 | 134 | 13 | 1,353 | 49 |
| TB-588  | 42.25098 | -118.24968 | 1.03 | 2.59 | 6.04 | 1.98 | 168 |    | 9.29  | 21  | 21  | 104 | 496 | 44 | 188 | 20 | 869   | 68 |

\* data in this appendix is not normalized

|            | P-28     |          |              | BIR-1A   |          |              | BCR      |          |              | AGV-1    |          |              |
|------------|----------|----------|--------------|----------|----------|--------------|----------|----------|--------------|----------|----------|--------------|
|            | Measured | Standard | % difference |
| P (wt. %)  | 0.14     | 0.18     | 0.20         | 0.02     | 0.01     | -0.99        | 0.16     | 0.16     | -0.01        | 0.14     | 0.11     | -0.33        |
| K (wt. %)  | 3.03     | 3.17     | 0.05         | 0.02     | 0.02     | -0.22        | 1.53     | 1.40     | -0.09        | 2.47     | 2.42     | -0.02        |
| Ca (wt. %) | 1.98     | 1.96     | -0.01        | 9.81     | 9.51     | -0.03        | 4.78     | 4.97     | 0.04         | 3.43     | 3.53     | 0.03         |
| Ti (wt. %) | 0.77     | 0.74     | -0.04        | 0.51     | 0.58     | 0.11         | 1.39     | 1.34     | -0.04        | 0.61     | 0.63     | 0.03         |
| V (ppm)    | 51       | 61       | 0.16         | 297      | 310      | 0.04         | 428      | 407      | -0.05        | 93       | 120      | 0.23         |
| Cr (ppm)   | 8        | 12       | 0.28         | 372      | 370      | -0.01        | 5        | 16       | 0.68         | 9        | 10       | 0.13         |
| Fe (wt. %) | 5        | 5        | -0.04        | 8        | 8        | 0.04         | 10       | 9        | -0.01        | 5        | 5        | 0.00         |
| Ni (ppm)   | 27       | 17       | -0.61        | 166      | 170      | 0.02         | 34       | 13       | -1.61        | 33       | 16       | -1.06        |
| Cu (ppm)   | 17       | 12       | -0.42        | 123      | 125      | 0.02         | 24       | 19       | -0.26        | 63       | 60       | -0.04        |
| Zn (ppm)   | 139      | 136      | -0.02        | 68       | 70       | 0.02         | 127      | 130      | 0.02         | 89       | 88       | -0.01        |
| Sr (ppm)   | 212      | 210      | -0.01        | 110      | 110      | 0.00         | 337      | 330      | -0.02        | 667      | 660      | -0.01        |
| Y (ppm)    | 57       | 61       | 0.07         | 17       | 16       | -0.03        | 40       | 38       | -0.05        | 28       | 20       | -0.38        |
| Zr (ppm)   | 468      | 452      | -0.04        | 19       | 18       | -0.08        | 178      | 190      | 0.06         | 214      | 227      | 0.06         |
| Nb (ppm)   | 98       | 98       | 0.00         | 3        | 1        | -4.00        | 13       | 14       | 0.04         | 14       | 15       | 0.05         |
| Ba (ppm)   | 1089     | 1070     | -0.02        | 8        | 7        | -0.16        | 690      | 681      | -0.01        | 1207     | 1230     | 0.02         |
| Ce (ppm)   | 127      | 129      | 0.02         |          |          |              | 51       | 54       | 0.05         | 63       | 67       | 0.06         |

## Appendix G: Rhyolite EDXRF Data

| Sample                | Unit                  | Map    |          |            | CaO     | TiO2    | MnO     | FeO*    | Cu    | Zn    | Ga    | Rb    | Sr    | Y     | Zr    | Nb    | Ba    | La    | Ce    | Nd    | Th    | U     |
|-----------------------|-----------------------|--------|----------|------------|---------|---------|---------|---------|-------|-------|-------|-------|-------|-------|-------|-------|-------|-------|-------|-------|-------|-------|
|                       |                       | Symbol | Latitude | Longitude  | (wt. %) | (wt. %) | (wt. %) | (wt. %) | (ppm) |
| Tuff of Oregon Canyon |                       |        |          |            |         |         |         |         |       |       |       |       |       |       |       |       |       |       |       |       |       |       |
| TB-102                | Tuff of Oregon Canyon | Tioc   | 41.95677 | -118.74579 | 0.83    | 0.22    | 0.06    | 2.58    | 10    | 177   | 26    | 191   | 15    | 52    | 690   | 31    | 39    | 60    | 107   | 52    | 20    | 3     |
| TB-133                | Tuff of Oregon Canyon | Tioc   | 41.88870 | -118.74813 | 0.24    | 0.26    | 0.03    | 2.58    | 10    | 162   | 25    | 190   | 18    | 71    | 690   | 35    | 209   | 64    | 115   | 60    | 20    | 5     |
| TB-215                | Tuff of Oregon Canyon | Tioc   | 42.09420 | -118.76440 | 0.17    | 0.21    | 0.04    | 2.52    | 6     | 155   | 26    | 195   | 6     | 37    | 725   | 40    | 23    | 59    | 62    | 60    | 20    | 4     |
| TB-224                | Tuff of Oregon Canyon | Tioc   | 41.96299 | -118.74632 | 0.23    | 0.23    | 0.05    | 2.89    | 8     | 201   | 25    | 187   | 18    | 77    | 718   | 39    | 40    | 68    | 142   | 80    | 23    | 8     |
| TB-228                | Tuff of Oregon Canyon | Tioc   | 41.96279 | -118.74337 | 0.69    | 0.23    | 0.06    | 2.63    | 8     | 193   | 25    | 191   | 18    | 65    | 679   | 38    | 43    | 57    | 101   | 50    | 20    | 4     |
| TB-257                | Tuff of Oregon Canyon | Tioc   | 42.15579 | -118.45510 | 0.34    | 0.28    | 0.04    | 2.57    | 10    | 198   | 25    | 199   | 20    | 68    | 757   | 44    | 89    | 68    | 147   | 56    | 20    | 8     |
| TB-258                | Tuff of Oregon Canyon | Tioc   | 42.15841 | -118.45181 | 0.23    | 0.18    | 0.04    | 2.56    | 5     | 153   | 25    | 195   | 7     | 68    | 684   | 34    | 14    | 64    | 140   | 61    | 21    | 3     |
| TB-261                | Tuff of Oregon Canyon | Tioc   | 42.15813 | -118.45164 | 0.44    | 0.39    | 0.04    | 2.89    | 11    | 215   | 23    | 187   | 37    | 90    | 653   | 38    | 173   | 73    | 144   | 59    | 17    | 9     |
| TB-264                | Tuff of Oregon Canyon | Tioc   | 42.32369 | -118.25404 | 0.08    | 0.20    | 0.01    | 1.46    | 2     | 111   | 24    | 197   | 4     | 69    | 701   | 42    | 21    | 41    | 119   | 44    | 19    | 5     |
| TB-338                | Tuff of Oregon Canyon | Tioc   | 42.16772 | -118.45278 | 0.54    | 0.38    | 0.04    | 3.05    | 10    | 199   | 25    | 185   | 58    | 87    | 643   | 36    | 185   | 61    | 128   | 55    | 19    | 8     |
| TB-345                | Tuff of Oregon Canyon | Tioc   | 42.67703 | 118.39009  | 1.36    | 0.53    | 0.08    | 4.77    | 37    | 142   | 24    | 128   | 55    | 37    | 439   | 25    | 363   | 26    | 75    | 52    | 12    | 3     |
| TB-366                | Tuff of Oregon Canyon | Tioc   | 42.28620 | -118.53970 | 2.21    | 0.85    | 0.08    | 6.20    | 20    | 202   | 23    | 61    | 69    | 45    | 298   | 17    | 1055  | 29    | 70    | 66    | 8     | 2     |
| TB-370                | Tuff of Oregon Canyon | Tioc   | 42.28736 | -118.54003 | 0.13    | 0.21    | 0.04    | 2.33    | 6     | 203   | 25    | 200   | 5     | 114   | 687   | 39    | 14    | 71    | 146   | 58    | 21    | 9     |
| TB-380B               | Tuff of Oregon Canyon | Tioc   | 42.17300 | -118.37319 | 0.20    | 0.25    | 0.04    | 2.68    | 14    | 240   | 26    | 199   | 13    | 104   | 709   | 39    | 40    | 83    | 126   | 66    | 24    | 8     |
| TB-416                | Tuff of Oregon Canyon | Tioc   | 42.52295 | -118.74353 | 0.22    | 0.23    | 0.06    | 2.77    | 8     | 197   | 25    | 191   | 10    | 81    | 689   | 38    | 35    | 76    | 156   | 73    | 23    | 9     |
| TB-429                | Tuff of Oregon Canyon | Tioc   | 42.15851 | -118.45157 | 0.67    | 0.36    | 0.04    | 2.88    | 9     | 198   | 24    | 185   | 41    | 110   | 653   | 37    | 128   | 66    | 133   | 54    | 17    | 6     |
| TB-430                | Tuff of Oregon Canyon | Tioc   | 42.15863 | -118.45163 | 0.51    | 0.35    | 0.05    | 2.81    | 12    | 189   | 24    | 182   | 47    | 107   | 653   | 38    | 183   | 71    | 137   | 61    | 17    | 8     |
| TB-431                | Tuff of Oregon Canyon | Tioc   | 42.15863 | -118.45166 | 0.55    | 0.32    | 0.05    | 2.79    | 9     | 211   | 25    | 191   | 35    | 103   | 698   | 41    | 114   | 57    | 138   | 50    | 18    | 7     |
| TB-432                | Tuff of Oregon Canyon | Tioc   | 42.15863 | -118.45166 | 0.35    | 0.21    | 0.09    | 2.42    | 7     | 186   | 26    | 195   | 12    | 60    | 700   | 36    | 70    | 63    | 124   | 53    | 19    | 4     |
| TB-433                | Tuff of Oregon Canyon | Tioc   | 42.15866 | -118.45172 | 0.50    | 0.15    | 0.05    | 2.52    | 6     | 152   | 26    | 197   | 9     | 67    | 714   | 37    | 21    | 75    | 155   | 67    | 21    | 3     |
| TB-434                | Tuff of Oregon Canyon | Tioc   | 42.15866 | -118.45182 | 0.20    | 0.20    | 0.05    | 2.50    | 7     | 139   | 25    | 194   | 11    | 62    | 608   | 33    | 36    | 64    | 143   | 52    | 20    | 3     |
| TB-435                | Tuff of Oregon Canyon | Tioc   | 42.15867 | -118.45187 | 0.52    | 0.38    | 0.11    | 3.94    | 8     | 189   | 26    | 150   | 19    | 58    | 429   | 27    | 267   | 52    | 116   | 51    | 15    | 4     |
| TB-436                | Tuff of Oregon Canyon | Tioc   | 42.15877 | -118.45211 | 1.16    | 0.64    | 0.33    | 5.52    | 11    | 148   | 24    | 113   | 63    | 40    | 364   | 21    | 836   | 39    | 80    | 54    | 11    | 3     |
| TB-444                | Tuff of Oregon Canyon | Tioc   | 42.26167 | -118.00729 | 0.12    | 0.26    | 0.03    | 1.95    | 6     | 143   | 26    | 199   | 6     | 87    | 733   | 33    | 23    | 37    | 125   | 52    | 21    | 4     |
| TB-445                | Tuff of Oregon Canyon | Tioc   | 42.26142 | -118.00754 | 0.30    | 0.27    | 0.06    | 2.88    | 7     | 159   | 26    | 180   | 12    | 70    | 645   | 35    | 44    | 69    | 146   | 68    | 19    | 4     |
| TB-453                | Tuff of Oregon Canyon | Tioc   | 42.26145 | -118.00526 | 0.14    | 0.24    | 0.02    | 2.26    | 5     | 151   | 26    | 195   | 7     | 70    | 704   | 35    | 25    | 41    | 105   | 50    | 21    | 4     |
| TB-492                | Tuff of Oregon Canyon | Tioc   | 42.23586 | -118.12184 | 0.64    | 0.19    | 0.03    | 1.75    | 10    | 126   | 23    | 195   | 14    | 66    | 709   | 39    | 71    | 63    | 132   | 54    | 20    | 5     |
| TB-520                | Tuff of Oregon Canyon | Tioc   | 42.42746 | -118.41569 | 0.66    | 0.74    | 0.03    | 1.88    | 11    | 67    | 21    | 64    | 60    | 68    | 264   | 19    | 1016  | 19    | 26    | 36    | 8     | 8     |
| TB-521                | Tuff of Oregon Canyon | Tioc   | 42.22126 | -118.42017 | 2.14    | 0.85    | 0.04    | 2.41    | 5     | 33    | 16    | 68    | 391   | 75    | 228   | 27    | 1532  | 34    | 50    | 26    | 5     | 4     |
| TB-525                | Tuff of Oregon Canyon | Tioc   | 42.31294 | -118.46549 | 0.83    | 0.75    | 0.05    | 5.65    | 9     | 131   | 24    | 98    | 41    | 42    | 329   | 18    | 850   | 37    | 74    | 64    | 8     | 5     |
| TB-526B               | Tuff of Oregon Canyon | Tioc   | 42.31274 | -118.46568 | 0.40    | 0.29    | 0.02    | 1.46    | 8     | 91    | 22    | 131   | 27    | 36    | 476   | 27    | 1161  | 53    | 101   | 52    | 12    | 5     |
| TB-527                | Tuff of Oregon Canyon | Tioc   | 42.35809 | -118.51115 | 0.32    | 0.35    | 0.01    | 1.75    | 8     | 112   | 23    | 130   | 28    | 59    | 423   | 24    | 1230  | 44    | 83    | 48    | 12    | 5     |
| TB-559                | Tuff of Oregon Canyon | Tioc   | 42.25679 | -118.42319 | 0.47    | 0.68    | 0.04    | 5.23    | 12    | 270   | 27    | 109   | 27    | 47    | 380   | 23    | 525   | 41    | 92    | 65    | 10    | 11    |
| TB-574                | Tuff of Oregon Canyon | Tioc   | 42.33103 | -118.19445 | 0.28    | 0.21    | 0.02    | 2.08    | 7     | 158   | 24    | 195   | 13    | 86    | 685   | 39    | 33    | 75    | 146   | 55    | 19    | 5     |
| TB-575                | Tuff of Oregon Canyon | Tioc   | 42.32801 | -118.18168 | 0.20    | 0.26    | 0.05    | 2.68    | 9     | 152   | 24    | 159   | 13    | 92    | 638   | 35    | 115   | 57    | 138   | 60    | 16    | 4     |
| TB-576A               | Tuff of Oregon Canyon | Tioc   | 42.32734 | -118.18269 | 0.22    | 0.36    | 0.10    | 4.05    | 9     | 198   | 27    | 138   | 9     | 70    | 514   | 28    | 64    | 51    | 113   | 64    | 14    | 7     |
| TB-576B               | Tuff of Oregon Canyon | Tioc   | 42.32734 | -118.18269 | 0.25    | 0.41    | 0.03    | 4.16    | 17    | 196   | 28    | 136   | 10    | 52    | 529   | 30    | 51    | 60    | 106   | 56    | 13    | 6     |
| TB-577                | Tuff of Oregon Canyon | Tioc   | 42.32598 | -118.18806 | 0.87    | 0.61    | 0.03    | 3.60    | 5     | 144   | 21    | 110   | 69    | 54    | 373   | 23    | 1109  | 40    | 84    | 47    | 9     | 4     |
| TB-578A               | Tuff of Oregon Canyon | Tioc   | 42.33702 | -118.14031 | 0.25    | 0.35    | 0.03    | 1.89    | 4     | 148   | 21    | 146   | 19    | 73    | 494   | 32    | 274   | 48    | 98    | 44    | 12    | 7     |
| TB-578B               | Tuff of Oregon Canyon | Tioc   | 42.33702 | -118.14031 | 1.02    | 0.72    | 0.03    | 5.08    | 6     | 141   | 22    | 101   | 112   | 49    | 338   | 20    | 1273  | 36    | 78    | 45    | 8     | 4     |
| TB-578C               | Tuff of Oregon Canyon | Tioc   | 42.33702 | -118.14031 | 1.16    | 0.37    | 0.03    | 3.47    | 4     | 93    | 23    | 143   | 43    | 36    | 422   | 25    | 278   | 40    | 95    | 41    | 13    | 1     |
| TB-578Cf              | Tuff of Oregon Canyon | Tioc   | 42.33702 | -118.14031 | 1.23    | 0.46    | 0.05    | 2.74    | 5     | 213   | 18    | 107   | 81    | 48    | 401   | 26    | 737   | 30    | 96    | 32    | 7     | 2     |
| TB-580                | Tuff of Oregon Canyon | Tioc   | 42.35153 | -118.14717 | 0.51    | 0.69    | 0.04    | 4.05    | 7     | 160   | 23    | 106   | 46    | 52    | 375   | 24    | 1006  | 32    | 67    | 51    | 10    | 10    |
| TB-595                | Tuff of Oregon Canyon | Tioc   | 42.67218 | -118.30680 | 1.51    | 0.24    | 0.05    | 2.53    | 21    | 221   | 26    | 129   | 95    | 74    | 738   | 47    | 45    | 63    | 133   | 39    | 14    | 3     |
| TB-601B               | Tuff of Oregon Canyon | Tioc   | 42.15345 | -118.27763 | 2.22    | 1.08    | 0.34    | 8.10    | 30    | 130   | 23    | 88    | 124   | 33    | 268   | 16    | 1633  | 27    | 74    | 79    | 7     | 2     |
| TB-601L1              | Tuff of Oregon Canyon | Tioc   | 42.15345 | -118.27763 | 0.22    | 0.22    | 0.06    | 2.52    | 4     | 175   | 26    | 196   | 6     | 47    | 607   | 32    | 27    | 43    | 96    | 48    | 18    | 6     |
| ML-304                | Tuff of Oregon Canyon | Tioc   | 42.03048 | -118.31897 | 0.22    | 0.23    | 0.05    | 2.67    | 6     | 181   | 25    | 199   | 18    | 32    | 622   | 36    | 48    | 20    | 96    | 31    | 19    | 4     |

*Tuff of Trout Creek Mountains*

|         |                               |      |          |            |      |      |      |      |    |     |    |     |    |    |     |    |    |    |    |    |    |   |
|---------|-------------------------------|------|----------|------------|------|------|------|------|----|-----|----|-----|----|----|-----|----|----|----|----|----|----|---|
| TB-225A | Tuff of Trout Creek Mountains | Titc | 41.96330 | -118.74812 | 0.43 | 0.36 | 0.03 | 3.32 | 14 | 143 | 29 | 112 | 22 | 48 | 417 | 22 | 94 | 41 | 66 | 53 | 11 | 3 |
|---------|-------------------------------|------|----------|------------|------|------|------|------|----|-----|----|-----|----|----|-----|----|----|----|----|----|----|---|

|         |                               |      |                      |            |      |      |      |      |    |     |    |     |    |     |     |    |     |    |     |     |    |    |
|---------|-------------------------------|------|----------------------|------------|------|------|------|------|----|-----|----|-----|----|-----|-----|----|-----|----|-----|-----|----|----|
| TB-225B | Tuff of Trout Creek Mountains | Titc | 41.96330             | -118.74812 | 0.22 | 0.34 | 0.11 | 4.20 | 8  | 204 | 27 | 130 | 9  | 68  | 483 | 23 | 70  | 41 | 93  | 118 | 18 | 6  |
| TB-249  | Tuff of Trout Creek Mountains | Titc | 42.09210             | -118.57826 | 0.37 | 0.29 | 0.04 | 3.74 | 12 | 124 | 25 | 97  | 19 | 32  | 335 | 20 | 202 | 31 | 79  | 46  | 9  | 2  |
| TB-251  | Tuff of Trout Creek Mountains | Titc | 42.09048             | -118.58061 | 0.40 | 0.30 | 0.05 | 2.88 | 6  | 125 | 25 | 100 | 16 | 31  | 341 | 19 | 100 | 28 | 84  | 40  | 9  | 2  |
| TB-254  | Tuff of Trout Creek Mountains | Titc | 42.29995             | -118.81105 | 0.25 | 0.35 | 0.05 | 3.42 | 6  | 178 | 26 | 118 | 30 | 50  | 449 | 25 | 251 | 89 | 65  | 71  | 12 | 4  |
| TB-255  | Tuff of Trout Creek Mountains | Titc | 42.15487             | -118.45924 | 0.24 | 0.31 | 0.07 | 3.59 | 5  | 147 | 26 | 127 | 9  | 50  | 461 | 24 | 47  | 18 | 59  | 53  | 13 |    |
| TB-256  | Tuff of Trout Creek Mountains | Titc | 42.15626             | -118.45720 | 0.35 | 0.27 | 0.06 | 4.17 | 8  | 247 | 30 | 201 | 10 | 35  | 834 | 37 | 21  | 47 | 87  | 59  | 24 | 4  |
| TB-259  | Tuff of Trout Creek Mountains | Titc | 42.15857             | -118.45186 | 0.74 | 0.49 | 0.13 | 4.96 | 9  | 175 | 24 | 131 | 35 | 50  | 486 | 27 | 614 | 54 | 118 | 77  | 13 | 4  |
| TB-260  | Tuff of Trout Creek Mountains | Titc | 42.15849             | -118.45244 | 0.22 | 0.27 | 0.12 | 4.88 | 11 | 307 | 28 | 217 | 11 | 100 | 944 | 39 | 65  | 86 | 198 | 174 | 31 | 11 |
| TB-262  | Tuff of Trout Creek Mountains | Titc | 42.15849             | -118.45244 | 0.22 | 0.26 | 0.09 | 3.89 | 10 | 269 | 27 | 195 | 8  | 101 | 841 | 39 | 27  | 81 | 183 | 82  | 22 | 9  |
| TB-265A | Tuff of Trout Creek Mountains | Titc | 42.30632             | -118.32468 | 0.24 | 0.27 | 0.08 | 3.17 | 7  | 164 | 25 | 119 | 14 | 64  | 461 | 23 | 172 | 44 | 103 | 66  | 13 | 5  |
| TB-265B | Tuff of Trout Creek Mountains | Titc | 42.30632             | -118.32468 | 0.14 | 0.26 | 0.07 | 2.88 | 6  | 152 | 26 | 123 | 7  | 67  | 438 | 25 | 92  | 49 | 103 | 59  | 11 | 4  |
| TB-334  | Tuff of Trout Creek Mountains | Titc | 42.21591             | -118.42984 | 0.27 | 0.39 | 0.06 | 3.54 | 7  | 121 | 27 | 105 | 21 | 53  | 343 | 20 | 204 | 32 | 67  | 58  | 11 |    |
| TB-335  | Tuff of Trout Creek Mountains | Titc | 42.16296             | -118.43580 | 0.20 | 0.30 | 0.10 | 4.30 | 9  | 261 | 28 | 199 | 6  | 48  | 841 | 40 | 49  | 40 | 144 | 58  | 24 |    |
| TB-339  | Tuff of Trout Creek Mountains | Titc | 42.16812             | -118.45359 | 0.30 | 0.29 | 0.08 | 4.31 | 8  | 273 | 29 | 200 | 11 | 71  | 859 | 33 | 33  | 60 | 104 | 81  | 25 |    |
| TB-341  | Tuff of Trout Creek Mountains | Titc | 42.31690             | -118.19619 | 0.29 | 0.32 | 0.09 | 2.63 | 10 | 121 | 25 | 111 | 17 | 41  | 366 | 21 | 128 | 27 | 65  | 41  | 11 |    |
| TB-346  | Tuff of Trout Creek Mountains | Titc | 42.48009             | -118.37859 | 0.38 | 0.34 | 0.04 | 2.14 | 7  | 138 | 27 | 163 | 22 | 66  | 519 | 26 | 130 | 46 | 102 | 48  | 19 |    |
| TB-347B | Tuff of Trout Creek Mountains | Titc | 42.48657             | -118.37910 | 0.37 | 0.31 | 0.08 | 3.49 | 7  | 197 | 26 | 140 | 17 | 74  | 488 | 25 | 102 | 44 | 103 | 57  | 14 | 5  |
| TB-348  | Tuff of Trout Creek Mountains | Titc | 42.50688             | -118.36958 | 0.82 | 0.38 | 0.04 | 3.97 | 11 | 201 | 26 | 158 | 34 | 65  | 578 | 32 | 122 | 61 | 103 | 49  | 15 |    |
| TB-349  | Tuff of Trout Creek Mountains | Titc | 42.50698             | -118.36960 | 0.26 | 0.38 | 0.18 | 1.35 | 10 | 77  | 18 | 94  | 39 | 44  | 291 | 22 | 260 | 21 | 53  | 27  | 7  |    |
| TB-359  | Tuff of Trout Creek Mountains | Titc | 42.24065             | -118.16669 | 0.52 | 0.28 | 0.12 | 4.68 | 13 | 275 | 27 | 189 | 32 | 94  | 816 | 34 | 59  | 68 | 156 | 151 | 28 |    |
| TB-360  | Tuff of Trout Creek Mountains | Titc | 42.24065             | -118.16669 | 0.22 | 0.29 | 0.11 | 3.83 | 8  | 208 | 26 | 146 | 6  | 75  | 577 | 26 | 32  | 52 | 113 | 83  | 19 |    |
| TB-361  | Tuff of Trout Creek Mountains | Titc | 42.24065             | -118.16669 | 0.18 | 0.28 | 0.06 | 3.04 | 5  | 164 | 25 | 122 | 7  | 49  | 471 | 25 | 38  | 31 | 78  | 55  | 13 |    |
| TB-364  | Tuff of Trout Creek Mountains | Titc | 42.16058             | -118.27713 | 0.44 | 0.35 | 0.10 | 4.00 | 8  | 180 | 27 | 145 | 21 | 35  | 554 | 27 | 109 | 34 | 73  | 49  | 16 |    |
| TB-368A | Tuff of Trout Creek Mountains | Titc | 42.28612             | -118.53942 | 0.20 | 0.28 | 0.11 | 4.44 | 10 | 286 | 27 | 197 | 7  | 97  | 873 | 38 | 19  | 74 | 162 | 107 | 27 |    |
| TB-368B | Tuff of Trout Creek Mountains | Titc | 42.28612             | -118.53942 | 0.20 | 0.28 | 0.07 | 3.75 | 5  | 248 | 27 | 197 | 7  | 99  | 833 | 33 | 16  | 58 | 151 | 67  | 22 |    |
| TB-377  | Tuff of Trout Creek Mountains | Titc | 42.15203             | -118.38088 | 0.20 | 0.30 | 0.06 | 4.15 | 6  | 221 | 28 | 185 | 7  | 44  | 725 | 31 | 26  | 41 | 70  | 56  | 22 |    |
| TB-381  | Tuff of Trout Creek Mountains | Titc | 42.16952             | -118.37212 | 0.23 | 0.30 | 0.10 | 3.66 | 7  | 204 | 27 | 142 | 7  | 56  | 525 | 25 | 47  | 39 | 87  | 56  | 16 |    |
| TB-399  | Tuff of Trout Creek Mountains | Titc | 42.05611             | -118.74860 | 0.19 | 0.26 | 0.05 | 2.67 | 8  | 172 | 26 | 192 | 15 | 41  | 672 | 35 | 52  | 53 | 100 | 58  | 20 |    |
| TB-400A | Tuff of Trout Creek Mountains | Titc | 42.05544             | -118.74989 | 0.24 | 0.23 | 0.07 | 3.05 | 12 | 254 | 26 | 195 | 11 | 101 | 757 | 38 | 30  | 90 | 135 | 97  | 26 |    |
| TB-400B | Tuff of Trout Creek Mountains | Titc | 42.05544             | -118.74989 | 0.16 | 0.26 | 0.04 | 2.68 | 12 | 263 | 26 | 193 | 11 | 98  | 688 | 39 | 32  | 87 | 119 | 70  | 21 |    |
| TB-402  | Tuff of Trout Creek Mountains | Titc | 42.16071             | -118.61413 | 0.35 | 0.18 | 0.04 | 2.08 | 6  | 129 | 22 | 165 | 12 | 60  | 521 | 32 | 36  | 43 | 104 | 43  | 15 |    |
| TB-403  | Tuff of Trout Creek Mountains | Titc | float in Pueblo Mtns |            | 0.18 | 0.27 | 0.06 | 3.66 | 4  | 236 | 26 | 187 | 5  | 68  | 784 | 35 | 21  | 43 | 118 | 52  | 20 |    |
| TB-406  | Tuff of Trout Creek Mountains | Titc | 42.10251             | -118.58645 | 0.60 | 0.18 | 0.03 | 1.77 | 13 | 102 | 19 | 153 | 12 | 49  | 526 | 37 | 74  | 41 | 87  | 38  | 14 | 4  |
| TB-407  | Tuff of Trout Creek Mountains | Titc | 42.10250             | -118.58656 | 0.17 | 0.29 | 0.10 | 4.08 | 11 | 295 | 28 | 218 | 5  | 104 | 872 | 40 | 20  | 76 | 162 | 85  | 24 |    |
| TB-408  | Tuff of Trout Creek Mountains | Titc | 42.10191             | -118.58705 | 0.11 | 0.31 | 0.02 | 3.80 | 8  | 201 | 30 | 211 | 9  | 95  | 793 | 38 | 20  | 65 | 149 | 83  | 27 |    |
| TB-409  | Tuff of Trout Creek Mountains | Titc | 42.10253             | -118.58990 | 0.47 | 0.30 | 0.03 | 3.48 | 9  | 191 | 28 | 201 | 21 | 89  | 941 | 36 | 33  | 69 | 171 | 81  | 26 |    |
| TB-410  | Tuff of Trout Creek Mountains | Titc | 42.10552             | -118.59209 | 0.16 | 0.29 | 0.06 | 3.87 | 5  | 196 | 28 | 203 | 5  | 44  | 806 | 24 | 37  | 53 | 67  | 64  | 23 |    |
| TB-411  | Tuff of Trout Creek Mountains | Titc | 41.96430             | -118.46585 | 0.36 | 0.61 | 0.21 | 5.66 | 15 | 133 | 24 | 110 | 44 | 29  | 388 | 22 | 617 | 26 | 55  | 57  | 12 |    |
| TB-412  | Tuff of Trout Creek Mountains | Titc | 41.96411             | -118.46707 | 0.70 | 0.45 | 0.16 | 4.03 | 10 | 125 | 21 | 113 | 27 | 42  | 366 | 22 | 350 | 31 | 74  | 43  | 11 |    |
| TB-437A | Tuff of Trout Creek Mountains | Titc | 42.15872             | -118.45243 | 0.24 | 0.29 | 0.09 | 3.90 | 10 | 272 | 28 | 189 | 10 | 112 | 873 | 40 | 117 | 86 | 188 | 84  | 22 | 10 |
| TB-437B | Tuff of Trout Creek Mountains | Titc | 42.15872             | -118.45243 | 0.34 | 0.25 | 0.10 | 4.08 | 11 | 269 | 27 | 190 | 6  | 96  | 864 | 38 | 36  | 84 | 190 | 92  | 24 | 8  |
| TB-438  | Tuff of Trout Creek Mountains | Titc | 42.15860             | -118.45258 | 0.56 | 0.28 | 0.08 | 4.08 | 8  | 261 | 29 | 198 | 12 | 75  | 852 | 35 | 59  | 56 | 185 | 61  | 22 | 4  |
| TB-439  | Tuff of Trout Creek Mountains | Titc | 42.15867             | -118.45271 | 0.96 | 0.29 | 0.09 | 4.07 | 11 | 267 | 28 | 195 | 29 | 73  | 831 | 37 | 182 | 67 | 164 | 62  | 21 | 3  |
| TB-440  | Tuff of Trout Creek Mountains | Titc | 42.15869             | -118.45292 | 0.31 | 0.30 | 0.14 | 3.56 | 8  | 157 | 26 | 138 | 15 | 40  | 530 | 27 | 129 | 26 | 110 | 49  | 15 | 2  |
| TB-441  | Tuff of Trout Creek Mountains | Titc | 42.15867             | -118.45322 | 0.25 | 0.30 | 0.08 | 3.78 | 6  | 161 | 28 | 141 | 4  | 37  | 534 | 26 | 25  | 47 | 58  | 66  | 16 | 2  |
| TB-442  | Tuff of Trout Creek Mountains | Titc | 42.15867             | -118.45322 | 0.27 | 0.31 | 0.07 | 3.51 | 7  | 151 | 27 | 131 | 7  | 62  | 471 | 24 | 68  | 38 | 110 | 50  | 13 | 3  |
| TB-443  | Tuff of Trout Creek Mountains | Titc | 42.15890             | -118.45338 | 0.37 | 0.37 | 0.07 | 3.76 | 9  | 133 | 26 | 100 | 22 | 44  | 339 | 19 | 208 | 32 | 71  | 54  | 10 | 3  |
| TB-451  | Tuff of Trout Creek Mountains | Titc | 42.25564             | -118.01474 | 0.32 | 0.44 | 0.12 | 4.00 | 9  | 135 | 26 | 115 | 21 | 37  | 422 | 23 | 248 | 34 | 76  | 55  | 12 | 3  |
| TB-456  | Tuff of Trout Creek Mountains | Titc | 42.23906             | -118.11455 | 0.67 | 0.31 | 0.09 | 3.91 | 8  | 251 | 27 | 182 | 22 | 81  | 788 | 37 | 92  | 66 | 170 | 66  | 19 | 5  |
| TB-474  | Tuff of Trout Creek Mountains | Titc | 42.16788             | -118.31411 | 0.17 | 0.26 | 0.07 | 3.25 | 6  | 171 | 27 | 138 | 7  | 59  | 563 | 29 | 53  | 53 | 81  | 63  | 16 | 3  |
| TB-475  | Tuff of Trout Creek Mountains | Titc | 42.16909             | -118.31446 | 0.23 | 0.21 | 0.05 | 2.51 | 9  | 201 | 25 | 200 | 10 | 63  | 728 | 41 | 30  | 69 | 138 | 57  | 21 | 7  |
| TB-476  | Tuff of Trout Creek Mountains | Titc | 42.16966             | -118.31533 | 0.33 | 0.28 | 0.10 | 3.67 | 11 | 252 | 28 | 191 | 17 | 107 | 827 | 40 | 221 | 87 | 182 | 81  | 21 | 8  |
| TB-482  | Tuff of Trout Creek Mountains | Titc | 42.18782             | -118.27436 | 0.20 | 0.28 | 0.11 | 4.60 | 10 | 293 | 28 | 202 | 16 | 116 | 901 | 38 | 110 | 84 | 174 | 134 | 29 | 10 |
| TB-484  | Tuff of Trout Creek Mountains | Titc | 42.23944             | -118.16778 | 0.19 | 0.26 | 0.07 | 2.97 | 7  | 171 | 25 | 129 | 6  | 72  | 491 | 25 | 48  | 50 | 104 | 49  | 13 | 6  |
| TB-487A | Tuff of Trout Creek Mountains | Titc | 42.23509             | -118.14529 | 0.39 | 0.30 | 0.05 | 2.83 | 5  | 167 | 26 | 129 | 11 | 66  | 454 | 23 | 47  | 48 | 70  | 45  | 12 | 4  |
| TB-487B | Tuff of Trout Creek Mountains | Titc | 42.23509             | -118.14529 | 0.20 | 0.28 | 0.08 | 3.41 | 7  | 179 | 25 | 136 | 4  | 67  | 505 | 25 | 34  | 45 | 98  | 74  | 16 | 6  |
| TB-489  | Tuff of Trout Creek Mountains | Titc | 42.23711             | -118.14308 | 0.40 | 0.45 | 0.03 | 3.08 | 5  | 140 | 25 | 125 | 24 | 50  | 463 | 23 | 109 | 38 | 82  | 43  | 12 | 5  |
| TB-490  | Tuff of Trout Creek Mountains | Titc | 42.23988             | -118.13392 | 0.57 | 0.52 | 0.07 | 4.00 | 7  | 75  | 18 | 86  | 44 | 34  | 258 | 18 | 890 | 26 | 59  | 40  | 6  | 5  |



|         |                               |      |          |            |      |      |      |      |    |     |    |     |    |    |     |    |     |    |     |    |    |   |
|---------|-------------------------------|------|----------|------------|------|------|------|------|----|-----|----|-----|----|----|-----|----|-----|----|-----|----|----|---|
| TB-523A | Tuff of Trout Creek Mountains | Titc | 42.31301 | -118.46471 | 0.18 | 0.28 | 0.10 | 3.53 | 9  | 192 | 26 | 142 | 3  | 75 | 579 | 28 | 24  | 58 | 126 | 87 | 17 | 7 |
| TB-523B | Tuff of Trout Creek Mountains | Titc | 42.31301 | -118.46471 | 0.19 | 0.31 | 0.04 | 2.96 | 5  | 165 | 26 | 143 | 7  | 79 | 547 | 25 | 29  | 50 | 104 | 61 | 15 | 5 |
| TB-524  | Tuff of Trout Creek Mountains | Titc | 42.31301 | -118.46471 | 0.16 | 0.34 | 0.06 | 2.11 | 7  | 84  | 27 | 113 | 9  | 64 | 382 | 21 | 94  | 36 | 75  | 56 | 11 | 3 |
| TB-556  | Tuff of Trout Creek Mountains | Titc | 42.25378 | -118.41910 | 0.06 | 0.29 | 0.01 | 1.71 | 3  | 82  | 26 | 142 | 5  | 82 | 501 | 26 | 25  | 31 | 103 | 42 | 14 | 6 |
| TB-564  | Tuff of Trout Creek Mountains | Titc | 42.30626 | -118.44143 | 0.38 | 0.36 | 0.02 | 2.62 | 15 | 120 | 28 | 114 | 14 | 37 | 422 | 23 | 78  | 24 | 77  | 35 | 10 | 3 |
| TB-581  | Tuff of Trout Creek Mountains | Titc | 42.35571 | -118.16152 | 0.49 | 0.38 | 0.07 | 3.44 | 12 | 182 | 27 | 137 | 16 | 60 | 520 | 27 | 121 | 49 | 109 | 52 | 13 | 4 |
| TB-587  | Tuff of Trout Creek Mountains | Titc | 42.23177 | -118.14407 | 0.42 | 0.31 | 0.09 | 3.50 | 10 | 205 | 27 | 164 | 27 | 75 | 642 | 32 | 257 | 49 | 141 | 56 | 16 | 5 |
| TB-604  | Tuff of Trout Creek Mountains | Titc | 42.07428 | -118.20325 | 0.36 | 0.41 | 0.12 | 3.50 | 8  | 124 | 27 | 104 | 23 | 33 | 362 | 21 | 137 | 32 | 74  | 49 | 10 | 3 |
| TB-606B | Tuff of Trout Creek Mountains | Titc | 42.06816 | -118.15829 | 0.21 | 0.32 | 0.11 | 3.77 | 9  | 211 | 27 | 140 | 11 | 73 | 533 | 26 | 64  | 48 | 108 | 75 | 16 | 7 |
| TB-612  | Tuff of Trout Creek Mountains | Titc | 42.34831 | -117.83201 | 0.14 | 0.42 | 0.07 | 3.48 | 9  | 142 | 26 | 113 | 19 | 50 | 415 | 24 | 463 | 18 | 46  | 43 | 11 | 4 |
| EW-101  | Tuff of Trout Creek Mountains | Titc | 42.28169 | -118.06816 | 0.48 | 0.58 | 0.14 | 4.14 | 12 | 170 | 27 | 114 | 35 | 66 | 402 | 22 | 276 | 49 | 83  | 59 | 10 | 9 |
| EW-102  | Tuff of Trout Creek Mountains | Titc | 42.41937 | -118.39911 | 0.17 | 0.33 | 0.01 | 0.93 | 1  | 89  | 22 | 91  | 12 | 44 | 335 | 21 | 146 | 24 | 72  | 36 | 8  | 4 |
| EW-209  | Tuff of Trout Creek Mountains | Titc | 42.34243 | -117.88123 | 0.29 | 0.35 | 0.08 | 3.33 | 10 | 160 | 25 | 117 | 17 | 65 | 437 | 23 | 145 | 44 | 102 | 54 | 12 | 5 |
| ML-206  | Tuff of Trout Creek Mountains | Titc | 42.29679 | -117.94602 | 0.53 | 0.39 | 0.13 | 3.46 | 9  | 143 | 26 | 116 | 34 | 32 | 449 | 25 | 355 | 27 | 110 | 53 | 11 | 2 |
| ML-209B | Tuff of Trout Creek Mountains | Titc | 42.34211 | -117.96329 | 0.53 | 0.35 | 0.12 | 3.66 | 8  | 174 | 26 | 123 | 13 | 68 | 472 | 24 | 102 | 49 | 109 | 75 | 13 | 4 |
| ML-213  | Tuff of Trout Creek Mountains | Titc | 42.33084 | -117.94741 | 0.38 | 0.37 | 0.12 | 3.26 | 9  | 138 | 27 | 115 | 36 | 40 | 425 | 24 | 547 | 46 | 131 | 57 | 11 | 2 |
| ML-215  | Tuff of Trout Creek Mountains | Titc | 42.30856 | -117.91747 | 0.45 | 0.41 | 0.11 | 3.45 | 12 | 131 | 26 | 111 | 27 | 34 | 411 | 23 | 170 | 37 | 94  | 50 | 11 | 2 |
| ML-219  | Tuff of Trout Creek Mountains | Titc | 42.25886 | -117.90849 | 0.54 | 0.43 | 0.11 | 3.72 | 14 | 148 | 27 | 110 | 36 | 87 | 413 | 22 | 201 | 58 | 96  | 72 | 11 | 4 |
| ML-229  | Tuff of Trout Creek Mountains | Titc | 42.32170 | -117.87295 | 0.32 | 0.36 | 0.09 | 3.25 | 8  | 157 | 26 | 117 | 25 | 40 | 369 | 24 | 194 | 35 | 86  | 51 | 11 | 4 |

*Tuff of Long Ridge*

|         |                    |      |                      |            |      |      |      |      |    |     |    |     |     |    |     |    |      |    |     |     |    |    |
|---------|--------------------|------|----------------------|------------|------|------|------|------|----|-----|----|-----|-----|----|-----|----|------|----|-----|-----|----|----|
| TB-134A | Tuff of Long Ridge | Tilr | 41.50017             | -118.61608 | 0.59 | 0.39 | 0.02 | 3.20 | 11 | 129 | 22 | 155 | 47  | 61 | 348 | 22 | 776  | 43 | 68  | 53  | 16 | 6  |
| TB-134B | Tuff of Long Ridge | Tilr | 41.50017             | -118.61608 | 1.11 | 0.41 | 0.11 | 4.05 | 10 | 155 | 23 | 146 | 49  | 55 | 342 | 21 | 1166 | 43 | 84  | 63  | 17 | 4  |
| TB-145  | Tuff of Long Ridge | Tilr | 42.24402             | -117.98764 | 0.24 | 0.32 | 0.07 | 3.45 | 6  | 115 | 26 | 180 | 13  | 35 | 430 | 24 | 342  | 33 | 59  | 57  | 21 | 5  |
| TB-146  | Tuff of Long Ridge | Tilr | 42.23993             | -117.99917 | 1.96 | 0.52 | 0.02 | 3.18 | 9  | 93  | 21 | 139 | 217 | 32 | 313 | 22 | 1968 | 45 | 85  | 44  | 13 | 3  |
| TB-226  | Tuff of Long Ridge | Tilr | 41.96416             | -118.75057 | 0.30 | 0.39 | 0.03 | 3.41 | 7  | 143 | 22 | 165 | 30  | 39 | 368 | 24 | 668  | 57 | 77  | 60  | 16 | 9  |
| TB-232  | Tuff of Long Ridge | Tilr | 41.68736             | -118.96021 | 0.32 | 0.31 | 0.09 | 3.71 | 9  | 173 | 25 | 191 | 13  | 61 | 463 | 23 | 136  | 45 | 97  | 164 | 32 | 9  |
| TB-268  | Tuff of Long Ridge | Tilr | float in Pueblo Mtns |            | 0.64 | 0.30 | 0.10 | 1.80 | 5  | 72  | 21 | 177 | 38  | 52 | 410 | 28 | 578  | 47 | 106 | 62  | 22 | 6  |
| TB-413  | Tuff of Long Ridge | Tilr | 41.96402             | -118.46824 | 0.34 | 0.33 | 0.07 | 3.36 | 7  | 159 | 26 | 188 | 14  | 41 | 450 | 25 | 129  | 34 | 48  | 61  | 22 |    |
| TB-452  | Tuff of Long Ridge | Tilr | 42.25548             | -118.01513 | 0.39 | 0.33 | 0.05 | 4.08 | 7  | 142 | 25 | 166 | 28  | 46 | 373 | 22 | 619  | 45 | 89  | 72  | 19 | 7  |
| TB-454  | Tuff of Long Ridge | Tilr | 42.28121             | -118.06619 | 0.31 | 0.31 | 0.08 | 3.21 | 9  | 165 | 26 | 193 | 14  | 53 | 491 | 26 | 94   | 49 | 118 | 74  | 22 | 7  |
| TB-455  | Tuff of Long Ridge | Tilr | 42.24698             | -118.12354 | 0.48 | 0.35 | 0.12 | 4.03 | 8  | 149 | 24 | 167 | 15  | 52 | 403 | 21 | 362  | 41 | 92  | 105 | 24 | 7  |
| TB-483  | Tuff of Long Ridge | Tilr | 42.18581             | -118.23918 | 0.18 | 0.45 | 0.04 | 3.66 | 5  | 125 | 23 | 159 | 20  | 39 | 359 | 22 | 762  | 37 | 60  | 54  | 17 | 15 |
| TB-518  | Tuff of Long Ridge | Tilr | 42.36390             | -118.14985 | 1.26 | 0.43 | 0.05 | 3.12 | 10 | 148 | 24 | 162 | 64  | 65 | 374 | 23 | 485  | 39 | 82  | 44  | 17 | 5  |
| TB-582A | Tuff of Long Ridge | Tilr | 42.22274             | -118.17183 | 0.76 | 0.38 | 0.10 | 3.93 | 7  | 132 | 23 | 162 | 20  | 51 | 369 | 19 | 620  | 38 | 93  | 104 | 23 | 6  |
| TB-582B | Tuff of Long Ridge | Tilr | 42.22274             | -118.17183 | 0.39 | 0.33 | 0.03 | 2.88 | 3  | 95  | 19 | 143 | 32  | 32 | 303 | 20 | 520  | 20 | 63  | 30  | 12 | 6  |
| TB-583  | Tuff of Long Ridge | Tilr | 42.22181             | -118.16881 | 0.61 | 0.45 | 0.05 | 4.01 | 12 | 133 | 25 | 163 | 48  | 39 | 362 | 20 | 578  | 34 | 87  | 46  | 17 | 8  |
| TB-584  | Tuff of Long Ridge | Tilr | 42.21431             | -118.15776 | 0.40 | 0.36 | 0.07 | 3.42 | 6  | 120 | 23 | 157 | 31  | 37 | 348 | 21 | 643  | 29 | 64  | 46  | 15 | 7  |
| TB-596  | Tuff of Long Ridge | Tilr | 42.68344             | -118.17466 | 0.62 | 0.28 | 0.08 | 3.11 | 10 | 167 | 25 | 187 | 16  | 67 | 471 | 25 | 81   | 47 | 101 | 64  | 23 | 6  |
| TB-603  | Tuff of Long Ridge | Tilr | 42.07429             | -118.20849 | 0.25 | 0.36 | 0.03 | 3.69 | 6  | 143 | 24 | 164 | 25  | 36 | 345 | 20 | 455  | 48 | 68  | 62  | 17 | 10 |
| TB-605  | Tuff of Long Ridge | Tilr | 42.08184             | -118.18592 | 0.35 | 0.34 | 0.06 | 3.69 | 5  | 123 | 25 | 174 | 25  | 24 | 390 | 23 | 449  | 16 | 74  | 48  | 18 | 7  |
| TB-611B | Tuff of Long Ridge | Tilr | 42.43557             | -117.82701 | 1.16 | 0.33 | 0.08 | 3.09 | 7  | 143 | 24 | 184 | 30  | 55 | 429 | 25 | 148  | 52 | 99  | 46  | 19 | 3  |
| TB-613A | Tuff of Long Ridge | Tilr | 42.35167             | -117.82856 | 1.00 | 0.40 | 0.09 | 3.71 | 13 | 172 | 24 | 163 | 57  | 67 | 435 | 25 | 287  | 45 | 97  | 54  | 18 | 5  |
| TB-613B | Tuff of Long Ridge | Tilr | 42.35167             | -117.82856 | 0.66 | 0.39 | 0.07 | 3.51 | 7  | 173 | 25 | 169 | 36  | 71 | 445 | 26 | 253  | 49 | 94  | 61  | 19 | 7  |
| TB-613C | Tuff of Long Ridge | Tilr | 42.35167             | -117.82856 | 0.19 | 0.38 | 0.04 | 2.88 | 7  | 146 | 24 | 189 | 20  | 98 | 476 | 30 | 306  | 50 | 104 | 48  | 18 | 13 |
| EW-201  | Tuff of Long Ridge | Tilr | 42.33298             | -117.87692 | 0.74 | 0.35 | 0.18 | 4.12 | 11 | 123 | 25 | 157 | 30  | 34 | 284 | 16 | 677  | 32 | 74  | 61  | 17 | 4  |
| EW-205  | Tuff of Long Ridge | Tilr | 42.31221             | -117.98046 | 0.76 | 0.41 | 0.13 | 4.19 | 11 | 143 | 24 | 165 | 27  | 52 | 361 | 20 | 569  | 40 | 95  | 82  | 19 | 6  |
| EW-208  | Tuff of Long Ridge | Tilr | 42.25315             | -117.97984 | 0.42 | 0.31 | 0.09 | 2.94 | 11 | 142 | 26 | 185 | 13  | 55 | 448 | 27 | 224  | 48 | 116 | 57  | 19 | 4  |
| EW-210  | Tuff of Long Ridge | Tilr | 42.34286             | -117.88136 | 0.39 | 0.36 | 0.15 | 3.97 | 11 | 120 | 24 | 163 | 28  | 36 | 363 | 21 | 739  | 36 | 100 | 64  | 18 | 7  |
| EW-211  | Tuff of Long Ridge | Tilr | 42.34282             | -117.88141 | 0.66 | 0.42 | 0.12 | 3.71 | 10 | 134 | 24 | 161 | 30  | 60 | 382 | 22 | 630  | 46 | 87  | 58  | 16 | 7  |
| EW-212  | Tuff of Long Ridge | Tilr | 42.34290             | -117.88182 | 0.69 | 0.39 | 0.12 | 3.98 | 9  | 139 | 24 | 162 | 25  | 51 | 384 | 21 | 630  | 41 | 98  | 91  | 20 | 6  |
| EW-213  | Tuff of Long Ridge | Tilr | 42.34311             | -117.88191 | 0.88 | 0.31 | 0.07 | 2.79 | 9  | 159 | 25 | 187 | 28  | 61 | 473 | 30 | 174  | 63 | 111 | 48  | 18 | 3  |
| ML-205  | Tuff of Long Ridge | Tilr | 42.32137             | -117.87562 | 0.34 | 0.30 | 0.09 | 2.95 | 6  | 142 | 25 | 182 | 12  | 58 | 453 | 27 | 222  | 46 | 121 | 53  | 19 | 5  |
| ML-207  | Tuff of Long Ridge | Tilr | 42.29664             | -117.94626 | 0.51 | 0.35 | 0.10 | 3.58 | 8  | 135 | 24 | 175 | 19  | 54 | 415 | 24 | 387  | 43 | 107 | 68  | 20 | 4  |
| ML-208  | Tuff of Long Ridge | Tilr | 42.34201             | -117.96427 | 0.23 | 0.32 | 0.02 | 3.44 | 8  | 139 | 25 | 176 | 19  | 46 | 422 | 24 | 287  | 42 | 65  | 62  | 20 | 8  |
| ML-211  | Tuff of Long Ridge | Tilr | 42.33017             | -117.94843 | 0.22 | 0.35 | 0.03 | 3.41 | 6  | 130 | 24 | 178 | 16  | 37 | 432 | 24 | 296  | 27 | 64  | 50  | 20 | 8  |
| ML-212  | Tuff of Long Ridge | Tilr | 42.33116             | -117.94813 | 0.40 | 0.34 | 0.11 | 3.54 | 9  | 141 | 25 | 173 | 19  | 44 | 396 | 23 | 402  | 38 | 93  | 65  | 20 | 5  |

|        |                    |      |          |            |      |      |      |      |    |     |    |     |    |    |     |    |     |    |     |    |    |    |
|--------|--------------------|------|----------|------------|------|------|------|------|----|-----|----|-----|----|----|-----|----|-----|----|-----|----|----|----|
| ML-214 | Tuff of Long Ridge | Tilr | 42.32900 | -117.92343 | 0.83 | 0.39 | 0.13 | 4.05 | 8  | 141 | 24 | 161 | 23 | 54 | 391 | 21 | 538 | 45 | 100 | 88 | 20 | 5  |
| ML-216 | Tuff of Long Ridge | Tilr | 42.30855 | -117.91772 | 0.46 | 0.27 | 0.09 | 3.14 | 7  | 143 | 25 | 189 | 11 | 57 | 441 | 26 | 137 | 50 | 112 | 62 | 22 | 5  |
| ML-217 | Tuff of Long Ridge | Tilr | 42.30843 | -117.91812 | 0.20 | 0.34 | 0.05 | 3.37 | 13 | 165 | 25 | 181 | 18 | 57 | 435 | 25 | 215 | 34 | 77  | 53 | 21 | 10 |
| ML-218 | Tuff of Long Ridge | Tilr | 42.26556 | -117.90865 | 0.43 | 0.30 | 0.08 | 3.14 | 8  | 145 | 26 | 185 | 10 | 55 | 461 | 26 | 153 | 45 | 98  | 59 | 22 | 4  |
| ML-235 | Tuff of Long Ridge | Tilr | 42.05475 | -118.43050 | 0.23 | 0.30 | 0.31 | 3.05 | 10 | 177 | 25 | 186 | 14 | 60 | 455 | 27 | 498 | 36 | 94  | 49 | 20 | 8  |

*Tuff of Whitehorse Creek*

|           |                                     |      |          |            |      |      |      |      |    |     |    |     |    |    |     |    |     |    |     |    |    |   |
|-----------|-------------------------------------|------|----------|------------|------|------|------|------|----|-----|----|-----|----|----|-----|----|-----|----|-----|----|----|---|
| TB-312A-D | Tuff of Whitehorse Ck               | Tiwc | 42.32533 | -118.38132 | 0.45 | 0.22 | 0.05 | 3.05 | 21 | 113 | 23 | 184 | 27 | 53 | 493 | 34 | 57  | 55 | 106 | 63 | 22 | 6 |
| TB-312A-L | Tuff of Whitehorse Ck               | Tiwc | 42.32533 | -118.38132 | 1.08 | 0.18 | 0.05 | 2.86 | 27 | 111 | 25 | 183 | 30 | 53 | 492 | 32 | 49  | 51 | 112 | 73 | 24 | 4 |
| TB-312B   | Tuff of Whitehorse Ck               | Tiwc | 42.32533 | -118.38132 | 1.41 | 0.16 | 0.04 | 2.33 | 20 | 100 | 23 | 188 | 87 | 55 | 477 | 31 | 18  | 50 | 94  | 51 | 21 | 4 |
| TB-322    | Tuff of Whitehorse Ck               | Tiwc | 42.22749 | -118.23219 | 1.25 | 0.26 | 0.07 | 2.95 | 14 | 111 | 25 | 194 | 68 | 54 | 547 | 40 | 103 | 49 | 114 | 44 | 19 | 4 |
| TB-343    | Tuff of Whitehorse Ck               | Tiwc | 42.24080 | -118.22108 | 0.11 | 0.17 | 0.03 | 2.09 | 7  | 111 | 24 | 202 | 8  | 58 | 536 | 40 | 25  | 49 | 86  | 48 | 21 | 7 |
| TB-352    | Tuff of Whitehorse Ck               | Tiwc | 42.35210 | -118.19310 | 0.19 | 0.18 | 0.04 | 2.51 | 11 | 120 | 24 | 185 | 18 | 66 | 541 | 36 | 44  | 53 | 107 | 79 | 26 | 8 |
| TB-478    | Tuff of Whitehorse Ck               | Tiwc | 42.17675 | -118.30975 | 0.82 | 0.33 | 0.09 | 3.97 | 19 | 119 | 24 | 181 | 46 | 52 | 503 | 36 | 92  | 50 | 103 | 46 | 18 | 5 |
| TB-519    | Tuff of Whitehorse Ck               | Tiwc | 42.42097 | -118.39715 | 1.06 | 0.32 | 0.05 | 3.80 | 8  | 165 | 23 | 184 | 24 | 55 | 410 | 23 | 132 | 42 | 94  | 49 | 18 | 5 |
| TB-522A   | Tuff of Whitehorse Ck               | Tiwc | 42.31314 | -118.48327 | 0.61 | 0.18 | 0.07 | 2.62 | 15 | 114 | 24 | 207 | 32 | 57 | 509 | 35 | 42  | 52 | 101 | 58 | 22 | 5 |
| TB-522B   | Tuff of Whitehorse Ck               | Tiwc | 42.31314 | -118.48327 | 1.09 | 0.21 | 0.05 | 2.98 | 15 | 104 | 22 | 188 | 43 | 57 | 494 | 32 | 60  | 48 | 108 | 71 | 23 | 4 |
| TB-522C   | Tuff of Whitehorse Ck               | Tiwc | 42.31314 | -118.48327 | 0.76 | 0.18 | 0.02 | 1.86 | 9  | 96  | 22 | 189 | 24 | 57 | 531 | 41 | 37  | 57 | 131 | 42 | 18 | 4 |
| TB-551    | Tuff of Whitehorse Ck               | Tiwc | 42.19563 | -118.36134 | 4.14 | 0.16 | 0.05 | 2.82 | 9  | 99  | 21 | 180 | 77 | 54 | 482 | 30 | 99  | 45 | 107 | 51 | 20 | 2 |
| TB-553    | Tuff of Whitehorse Ck               | Tiwc | 42.24478 | -118.42454 | 1.50 | 0.33 | 0.06 | 3.12 | 20 | 108 | 23 | 189 | 72 | 58 | 471 | 35 | 115 | 50 | 97  | 39 | 16 | 3 |
| TB-553P   | Tuff of Whitehorse Ck               | Tiwc | 42.24478 | -118.42454 | 0.57 | 0.16 | 0.07 | 2.76 | 17 | 112 | 24 | 214 | 16 | 53 | 510 | 32 | 16  | 46 | 95  | 67 | 25 | 5 |
| TB-554    | Tuff of Whitehorse Ck               | Tiwc | 42.24480 | -118.42429 | 0.77 | 0.27 | 0.04 | 2.52 | 14 | 113 | 22 | 195 | 70 | 62 | 485 | 37 | 358 | 53 | 99  | 46 | 18 | 5 |
| TB-554P   | Tuff of Whitehorse Ck               | Tiwc | 42.24480 | -118.42429 | 0.40 | 0.17 | 0.06 | 2.73 | 10 | 110 | 23 | 200 | 14 | 54 | 481 | 32 | 50  | 49 | 102 | 64 | 24 | 6 |
| TB-555    | Tuff of Whitehorse Ck               | Tiwc | 42.24480 | -118.42426 | 0.56 | 0.21 | 0.03 | 2.82 | 9  | 103 | 22 | 200 | 43 | 58 | 519 | 38 | 75  | 53 | 107 | 55 | 20 | 6 |
| TB-566    | Tuff of Whitehorse Ck               | Tiwc | 42.31015 | -118.43772 | 0.25 | 0.18 | 0.02 | 2.15 | 12 | 102 | 23 | 192 | 20 | 56 | 517 | 41 | 47  | 52 | 105 | 40 | 17 | 7 |
| W7-450    | Tuff of Whitehorse Ck, intracaldera | Tiwc | 42.20448 | -118.33549 | 1.01 | 0.21 | 0.06 | 2.68 | 9  | 134 | 25 | 204 | 33 | 70 | 563 | 45 | 40  | 57 | 109 | 38 | 17 | 5 |
| W7-488    | Tuff of Whitehorse Ck, intracaldera | Tiwc | 42.20448 | -118.33549 | 0.77 | 0.19 | 0.05 | 2.64 | 9  | 116 | 24 | 215 | 25 | 51 | 543 | 41 | 31  | 50 | 94  | 42 | 19 | 4 |
| W7-512    | Tuff of Whitehorse Ck, intracaldera | Tiwc | 42.20448 | -118.33549 | 0.74 | 0.20 | 0.05 | 2.74 | 10 | 129 | 26 | 208 | 26 | 57 | 480 | 36 | 34  | 53 | 96  | 37 | 18 | 5 |
| W7-522    | Tuff of Whitehorse Ck, intracaldera | Tiwc | 42.20448 | -118.33549 | 0.68 | 0.20 | 0.05 | 2.62 | 8  | 110 | 24 | 201 | 21 | 54 | 478 | 34 | 52  | 53 | 97  | 47 | 19 | 5 |

Lavas

*OCT-related lavas*

|          |                                            |      |          |            |      |      |      |      |    |     |    |     |    |    |     |    |     |    |     |    |    |   |
|----------|--------------------------------------------|------|----------|------------|------|------|------|------|----|-----|----|-----|----|----|-----|----|-----|----|-----|----|----|---|
| TB-266   | North Red Mountain rhyolite lava           | Tloo | 42.31038 | -118.32269 | 0.37 | 0.19 | 0.04 | 2.02 | 5  | 103 | 20 | 168 | 10 | 52 | 552 | 30 | 178 | 50 | 132 | 55 | 18 | 5 |
| TB-309   | North Red Mountain rhyolite lava           | Tloo | 42.32440 | -118.29716 | 0.15 | 0.20 | 0.01 | 1.80 | 9  | 98  | 24 | 174 | 10 | 63 | 563 | 32 | 199 | 43 | 96  | 50 | 19 | 7 |
| TB-310   | North Red Mountain rhyolite lava           | Tloo | 42.32365 | -118.29129 | 0.05 | 0.20 | 0.01 | 0.90 | 7  | 45  | 24 | 185 | 4  | 50 | 587 | 33 | 163 | 43 | 78  | 52 | 21 | 8 |
| TB-571   | North Red Mountain rhyolite lava           | Tloo | 42.32951 | -118.32822 | 0.32 | 0.19 | 0.01 | 1.54 | 4  | 105 | 21 | 175 | 12 | 59 | 537 | 31 | 149 | 58 | 97  | 47 | 17 | 6 |
| TB-355   | Whitehorse Canyon rhyolite lava            | Tloo | 42.23749 | -118.15452 | 0.11 | 0.17 | 0.09 | 1.95 | 10 | 101 | 22 | 170 | 5  | 40 | 548 | 33 | 177 | 38 | 95  | 43 | 16 | 6 |
| TB-486   | Whitehorse Canyon rhyolite lava            | Tloo | 42.23459 | -118.15136 | 0.14 | 0.15 | 0.01 | 1.08 | 5  | 64  | 19 | 151 | 6  | 58 | 518 | 32 | 53  | 48 | 93  | 37 | 13 | 6 |
| TB-488   | Whitehorse Canyon rhyolite lava            | Tloo | 42.23518 | -118.14332 | 0.12 | 0.17 | 0.03 | 1.76 | 11 | 90  | 21 | 168 | 7  | 74 | 613 | 38 | 63  | 58 | 142 | 52 | 16 | 7 |
| TB-493   | Whitehorse Canyon rhyolite lava            | Tloo | 42.23578 | -118.12193 | 0.22 | 0.13 | 0.02 | 0.99 | 5  | 69  | 20 | 147 | 30 | 42 | 520 | 37 | 98  | 32 | 58  | 24 | 12 | 5 |
| TB-586   | Whitehorse Canyon rhyolite lava            | Tloo | 42.23179 | -118.14403 | 0.10 | 0.13 | 0.02 | 1.19 | 4  | 81  | 19 | 154 | 8  | 63 | 535 | 33 | 58  | 46 | 99  | 38 | 14 | 6 |
| TB-306   | Antelope Creek rhyolite lava               | Tloo | 42.34863 | -118.15720 | 0.14 | 0.21 | 0.03 | 2.37 | 4  | 209 | 24 | 170 | 11 | 86 | 697 | 37 | 127 | 57 | 146 | 58 | 18 | 7 |
| TB-353   | Antelope Creek rhyolite lava               | Tloo | 42.31555 | -118.18646 | 0.27 | 0.25 | 0.05 | 2.31 | 5  | 165 | 25 | 160 | 9  | 75 | 682 | 34 | 118 | 55 | 132 | 51 | 15 | 4 |
| TB-517   | Antelope Creek rhyolite lava               | Tloo | 42.34693 | -118.15824 | 0.90 | 0.21 | 0.03 | 2.15 | 10 | 174 | 25 | 167 | 12 | 86 | 687 | 30 | 112 | 62 | 130 | 51 | 16 | 2 |
| TB-601L2 | Lithic of pre-caldera rhyolite lava in Tio | Tloo |          |            | 0.18 | 0.20 | 0.05 | 2.32 | 5  | 164 | 25 | 200 | 4  | 62 | 672 | 38 | 24  | 55 | 124 | 52 | 18 | 7 |

*TCT-related rhyolite Lavas*

|        |                                       |      |          |            |      |      |      |      |    |     |    |     |    |     |     |    |      |    |     |     |    |    |
|--------|---------------------------------------|------|----------|------------|------|------|------|------|----|-----|----|-----|----|-----|-----|----|------|----|-----|-----|----|----|
| TB-354 | Fish Creek rhyolite lava              | Tlto | 42.28041 | -118.18412 | 0.26 | 0.28 | 0.03 | 3.80 | 8  | 158 | 28 | 169 | 13 | 103 | 775 | 38 | 80   | 82 | 184 | 71  | 18 | 4  |
| TB-516 | Fish Creek rhyolite lava              | Tlto | 42.29368 | -118.14030 | 0.57 | 0.27 | 0.08 | 3.39 | 11 | 165 | 28 | 171 | 22 | 93  | 722 | 33 | 72   | 65 | 148 | 62  | 18 | 3  |
| TB-464 | Pole Canyon Volcanics rhyolite lava   | Tlty | 42.17849 | -118.36721 | 0.14 | 0.30 | 0.01 | 0.69 | 3  | 52  | 23 | 180 | 15 | 120 | 561 | 30 | 1044 | 67 | 110 | 56  | 16 | 10 |
| TB-319 | Pole Canyon Volcanics rhyodacite lava | Tlty | 42.19081 | -118.38354 | 0.88 | 0.43 | 0.10 | 5.93 | 10 | 108 | 23 | 148 | 56 | 63  | 300 | 16 | 952  | 75 | 188 | 122 | 15 | 5  |

*Perlitic rhyolite lava of Tule Rims*

|        |                                     |      |          |            |      |      |      |      |   |    |    |     |    |    |     |    |     |    |    |    |    |   |
|--------|-------------------------------------|------|----------|------------|------|------|------|------|---|----|----|-----|----|----|-----|----|-----|----|----|----|----|---|
| TB-567 | Perlitic rhyolite lava of Tule Rims | Trtr | 42.34089 | -118.40108 | 0.39 | 0.17 | 0.03 | 1.13 | 5 | 47 | 18 | 204 | 23 | 51 | 216 | 20 | 228 | 38 | 82 | 61 | 30 | 8 |
| TB-569 | Perlitic rhyolite lava of Tule Rims | Trtr | 42.35966 | -118.39462 | 0.42 | 0.17 | 0.03 | 1.11 | 6 | 48 | 18 | 204 | 23 | 51 | 212 | 22 | 226 | 38 | 84 | 53 | 29 | 7 |

*Pre-caldera whitehorse lavas*

|         |                                      |      |          |            |      |      |      |      |    |     |    |     |    |    |     |    |    |    |     |    |    |   |
|---------|--------------------------------------|------|----------|------------|------|------|------|------|----|-----|----|-----|----|----|-----|----|----|----|-----|----|----|---|
| TB-263  | Camp turnoff rhyolite lava           | Tlwo | 42.29888 | -118.26780 | 0.15 | 0.08 | 0.00 | 0.40 | 3  | 26  | 20 | 241 | 6  | 44 | 328 | 49 | 22 | 22 | 54  | 30 | 17 | 5 |
| TB-307  | Camp turnoff rhyolite lava           | Tlwo | 42.29710 | -118.26900 | 0.14 | 0.09 | 0.01 | 1.03 | 5  | 54  | 22 | 224 | 6  | 57 | 305 | 47 | 31 | 39 | 86  | 37 | 21 | 4 |
| TB-320  | North Whitehorse Butte rhyolite lava | Tlwo | 42.26797 | -118.24235 | 0.37 | 0.09 | 0.03 | 1.13 | 6  | 58  | 22 | 240 | 12 | 61 | 414 | 47 | 20 | 43 | 91  | 39 | 21 | 5 |
| TB-342  | Whitehorse Butte rhyolite lava       | Tlwo | 42.24840 | -118.21720 | 1.68 | 0.08 | 0.03 | 1.08 | 12 | 60  | 21 | 250 | 24 | 57 | 273 | 46 | 31 | 35 | 77  | 31 | 18 | 3 |
| TB-609  | NE Campground rhyolite lava          | Tlwo | 42.28671 | -118.24941 | 0.08 | 0.07 | 0.01 | 0.74 | 6  | 59  | 20 | 244 | 3  | 63 | 285 | 49 | 14 | 36 | 67  | 32 | 18 | 6 |
| TB-362A | Bearclaw rhyolite lava               | Tlwo | 42.18745 | -118.32624 | 0.26 | 0.15 | 0.04 | 1.75 | 6  | 101 | 23 | 197 | 4  | 63 | 535 | 43 | 13 | 61 | 118 | 40 | 16 | 6 |
| TB-362B | Bearclaw rhyolite lava               | Tlwo | 42.18745 | -118.32624 | 0.34 | 0.12 | 0.05 | 1.82 | 6  | 94  | 22 | 189 | 5  | 57 | 528 | 39 | 11 | 58 | 124 | 54 | 19 | 5 |
| TB-363  | Bearclaw rhyolite lava               | Tlwo | 42.18741 | -118.32510 | 0.23 | 0.13 | 0.05 | 1.82 | 6  | 97  | 22 | 191 | 4  | 57 | 517 | 40 | 15 | 55 | 112 | 40 | 18 | 6 |
| TB-469  | Bearclaw rhyolite lava               | Tlwo | 42.17758 | -118.34011 | 0.20 | 0.13 | 0.05 | 1.70 | 6  | 93  | 23 | 203 | 5  | 53 | 522 | 39 | 31 | 53 | 117 | 36 | 16 | 4 |
| TB-470  | Bearclaw rhyolite lava               | Tlwo | 42.17702 | -118.34084 | 0.24 | 0.14 | 0.03 | 1.68 | 7  | 98  | 22 | 203 | 12 | 55 | 528 | 43 | 86 | 54 | 108 | 37 | 16 | 7 |
| TB-473  | Bearclaw rhyolite lava               | Tlwo | 42.17804 | -118.31428 | 0.20 | 0.13 | 0.03 | 1.67 | 7  | 97  | 23 | 201 | 11 | 51 | 541 | 44 | 86 | 53 | 101 | 39 | 17 | 5 |
| W7-729  | Bearclaw rhyolite lava               | Tlwo | 42.20448 | -118.33549 | 0.13 | 0.13 | 0.03 | 1.58 | 5  | 86  | 22 | 200 | 4  | 60 | 517 | 43 | 10 | 59 | 113 | 44 | 17 | 5 |
| W7-655  | Bearclaw rhyolite lava               | Tlwo | 42.20448 | -118.33549 | 0.11 | 0.12 | 0.02 | 1.56 | 5  | 85  | 22 | 203 | 3  | 68 | 519 | 43 | 10 | 66 | 119 | 46 | 18 | 6 |
| W7-590  | Bearclaw rhyolite lava               | Tlwo | 42.20448 | -118.33549 | 0.75 | 0.14 | 0.06 | 1.94 | 8  | 103 | 23 | 181 | 14 | 51 | 522 | 40 | 8  | 49 | 104 | 41 | 18 | 4 |

*Post-caldera rhyolite lavas*

|        |                                            |      |          |            |      |      |      |      |    |    |    |     |     |    |     |    |     |    |     |    |    |    |
|--------|--------------------------------------------|------|----------|------------|------|------|------|------|----|----|----|-----|-----|----|-----|----|-----|----|-----|----|----|----|
| TB-314 | Red Lookout Butte rhyolite lava            | Tlwy | 42.32142 | -118.38638 | 0.14 | 0.14 | 0.04 | 1.66 | 5  | 80 | 22 | 198 | 10  | 46 | 455 | 34 | 46  | 49 | 107 | 36 | 18 | 5  |
| TB-563 | Red Lookout Butte rhyolite lava            | Tlwy | 42.31757 | -118.40485 | 0.56 | 0.16 | 0.03 | 1.71 | 16 | 84 | 24 | 196 | 16  | 52 | 454 | 34 | 74  | 51 | 114 | 37 | 16 | 4  |
| TB-330 | North Flagstaff Ranch rhyolite lava        | Tlwy | 42.19103 | -118.36059 | 0.23 | 0.13 | 0.03 | 1.50 | 6  | 69 | 22 | 194 | 8   | 47 | 448 | 41 | 25  | 53 | 100 | 38 | 16 | 3  |
| TB-331 | North Flagstaff Ranch rhyolite lava        | Tlwy | 42.19218 | -118.35779 | 0.04 | 0.12 | 0.01 | 1.06 | 6  | 71 | 22 | 178 | 3   | 41 | 429 | 37 | 19  | 43 | 87  | 33 | 13 | 6  |
| TB-502 | West Willow Butte aphyric rhyolite lava    | Tlwy | 42.20465 | -118.31746 | 0.29 | 0.13 | 0.05 | 1.65 | 7  | 99 | 23 | 203 | 2   | 62 | 530 | 43 | 7   | 55 | 112 | 35 | 17 | 6  |
| TB-503 | West Willow Butte aphyric rhyolite lava    | Tlwy | 42.20698 | -118.31431 | 0.09 | 0.14 | 0.02 | 1.35 | 5  | 92 | 23 | 206 | 7   | 57 | 539 | 44 | 27  | 58 | 114 | 39 | 17 | 5  |
| TB-561 | Lizard Point rhyolite lava                 | Tlwy | 42.28884 | -118.37368 | 0.09 | 0.19 | 0.01 | 1.00 | 7  | 38 | 25 | 206 | 14  | 69 | 487 | 40 | 81  | 54 | 116 | 45 | 18 | 7  |
| TB-467 | South Flagstaff Ranch rhyolite lava        | Tlwy | 42.18254 | -118.35310 | 0.11 | 0.13 | 0.01 | 1.38 | 3  | 66 | 23 | 209 | 9   | 65 | 522 | 39 | 25  | 50 | 105 | 38 | 18 | 5  |
| TB-468 | South Flagstaff Ranch rhyolite lava        | Tlwy | 42.18450 | -118.35268 | 0.10 | 0.12 | 0.01 | 1.23 | 5  | 79 | 22 | 201 | 7   | 62 | 496 | 40 | 18  | 51 | 100 | 38 | 16 | 6  |
| TB-315 | Buckskin Mountain rhyolite lava            | Tlwy | 42.27806 | -118.38803 | 0.72 | 0.37 | 0.01 | 0.74 | 5  | 25 | 17 | 132 | 180 | 54 | 314 | 24 | 560 | 30 | 58  | 27 | 13 | 7  |
| TB-316 | Buckskin Mountain rhyolite lava            | Tlwy | 42.27248 | -118.38550 | 0.17 | 0.12 | 0.01 | 0.88 | 8  | 53 | 20 | 241 | 7   | 90 | 330 | 39 | 30  | 58 | 101 | 44 | 29 | 9  |
| TB-497 | Buckskin Mountain rhyolite lava            | Tlwy | 42.24979 | -118.38443 | 0.18 | 0.13 | 0.01 | 0.91 | 6  | 38 | 21 | 247 | 6   | 52 | 310 | 37 | 18  | 51 | 88  | 39 | 27 | 8  |
| TB-498 | Buckskin Mountain rhyolite lava            | Tlwy | 42.25100 | -118.38515 | 0.21 | 0.12 | 0.03 | 1.36 | 9  | 73 | 20 | 249 | 6   | 60 | 335 | 38 | 50  | 57 | 115 | 50 | 30 | 9  |
| TB-557 | Buckskin Mountain rhyolite lava            | Tlwy | 42.25523 | -118.41806 | 0.56 | 0.15 | 0.02 | 1.40 | 4  | 74 | 19 | 236 | 17  | 56 | 345 | 39 | 17  | 47 | 104 | 38 | 24 | 7  |
| TB-558 | Buckskin Mountain rhyolite lava            | Tlwy | 42.25534 | -118.41753 | 0.15 | 0.12 | 0.01 | 1.12 | 5  | 60 | 19 | 241 | 4   | 60 | 328 | 38 | 10  | 52 | 96  | 33 | 26 | 9  |
| TB-318 | Flagstaff Butte rhyolite lava              | Tlwy | 42.19081 | -118.38354 | 0.06 | 0.11 | 0.00 | 0.53 | 4  | 21 | 20 | 231 | 16  | 84 | 422 | 38 | 24  | 61 | 115 | 48 | 24 | 7  |
| TB-591 | Willow Butte rhyolite tuff                 | Tlwy | 42.20094 | -118.25740 | 0.58 | 0.12 | 0.05 | 1.81 | 10 | 87 | 21 | 233 | 23  | 62 | 414 | 38 | 20  | 53 | 110 | 50 | 29 | 6  |
| TB-592 | Willow Butte rhyolite lava                 | Tlwy | 42.20618 | -118.25742 | 0.09 | 0.13 | 0.02 | 1.51 | 5  | 84 | 21 | 246 | 8   | 80 | 413 | 42 | 17  | 73 | 119 | 48 | 27 | 10 |
| TB-593 | Willow Butte rhyolite lava                 | Tlwy | 42.20687 | -118.26079 | 1.63 | 0.13 | 0.01 | 1.31 | 9  | 80 | 22 | 237 | 20  | 72 | 362 | 38 | 30  | 70 | 134 | 44 | 26 | 4  |
| TB-267 | Red Mountain rhyolite lava                 | Tlwy | 42.28585 | -118.28275 | 0.03 | 0.12 | 0.01 | 1.18 | 5  | 60 | 22 | 292 | 2   | 68 | 387 | 43 | 7   | 57 | 113 | 38 | 26 | 8  |
| TB-311 | Red Mountain rhyolite lava                 | Tlwy | 42.26521 | -118.31695 | 0.15 | 0.09 | 0.01 | 0.95 | 8  | 38 | 20 | 199 | 9   | 46 | 338 | 39 | 14  | 43 | 92  | 36 | 19 | 6  |
| TB-572 | Red Mountain rhyolite lava                 | Tlwy | 42.27900 | -118.29173 | 0.32 | 0.11 | 0.00 | 0.56 | 4  | 31 | 21 | 306 | 5   | 56 | 403 | 41 | 12  | 20 | 40  | 37 | 30 | 7  |
| TB-573 | Red Mountain rhyolite lava                 | Tlwy | 42.28692 | -118.31409 | 0.45 | 0.10 | 0.03 | 1.33 | 7  | 72 | 20 | 262 | 14  | 36 | 352 | 45 | 15  | 30 | 68  | 34 | 29 | 7  |
| TB-590 | West Willow Creek rhyolite lava            | Tlwy | 42.24478 | -118.24621 | 0.44 | 0.12 | 0.04 | 1.29 | 7  | 92 | 25 | 219 | 44  | 82 | 413 | 45 | 57  | 68 | 127 | 42 | 24 | 7  |
| TB-321 | South camp rhyolite lava                   | Tlwy | 42.26661 | -118.25176 | 0.44 | 0.15 | 0.02 | 1.07 | 8  | 31 | 21 | 184 | 26  | 52 | 299 | 28 | 168 | 34 | 75  | 40 | 20 | 7  |
| TB-323 | Campground rhyolite lava                   | Tlwy | 42.27470 | -118.26479 | 0.35 | 0.18 | 0.00 | 0.39 | 5  | 8  | 17 | 184 | 27  | 33 | 314 | 30 | 154 | 26 | 56  | 36 | 19 | 6  |
| TB-589 | East Willow Creek rhyolite lava            | Tlwy | 42.24952 | -118.24740 | 0.85 | 0.10 | 0.03 | 1.29 | 5  | 81 | 19 | 230 | 101 | 68 | 358 | 42 | 11  | 57 | 118 | 32 | 21 | 6  |
| TB-317 | Buckskin Mountain hornblende rhyolite lava | Tlwy | 42.26712 | -118.38269 | 0.35 | 0.14 | 0.01 | 0.81 | 3  | 21 | 18 | 242 | 59  | 47 | 178 | 38 | 187 | 43 | 73  | 37 | 30 | 8  |
| TB-499 | Buckskin Mountain hornblende rhyolite lava | Tlwy | 42.25675 | -118.37917 | 0.61 | 0.13 | 0.03 | 1.08 | 7  | 49 | 18 | 231 | 43  | 55 | 180 | 36 | 187 | 35 | 79  | 35 | 25 | 7  |
| TB-500 | Buckskin Mountain hornblende rhyolite lava | Tlwy | 42.25693 | -118.38116 | 0.46 | 0.14 | 0.01 | 0.71 | 3  | 29 | 17 | 199 | 50  | 48 | 173 | 36 | 219 | 38 | 76  | 28 | 21 | 7  |

|           | AGV-1    |          |              | P-28     |          |              | GSP-1    |          |              | G-2      |          |              | 992-15   |          |              |
|-----------|----------|----------|--------------|----------|----------|--------------|----------|----------|--------------|----------|----------|--------------|----------|----------|--------------|
|           | Measured | Standard | % difference |
| Ca (wt %) | 3.56     | 3.53     | -0.01        | 2.11     | 1.96     | -0.08        | 1.45     | 1.50     | 0.03         | 1.39     | 1.40     | 0.01         | 0.19     | 0.21     | 0.10         |
| Ti (ppm)  | 6390     | 6293     | -0.02        | 7638     | 7372     | -0.04        | 3832     | 2397     | -0.60        | 2778     | 2877     | 0.03         | 386.2    | 360      | -0.07        |
| Mn (ppm)  | 691      | 710      | 0.03         | 1679     | 1704     | 0.01         | 336.6    | 320      | -0.05        | 224.5    | 232      | 0.03         | 275      | 310      | 0.11         |
| Fe (ppm)  | 47670    | 47351    | -0.01        | 53490    | 52456    | -0.02        | 34790    | 30005    | -0.16        | 18450    | 18605    | 0.01         | 8509     | 9300     | 0.09         |
| Cu (ppm)  | 59.7     | 60       | 0.00         | 10.8     | 12       | 0.10         | 40.7     | 43       | 0.05         | 12.4     | 11       | -0.13        | 3.4      |          |              |
| Zn (ppm)  | 88.5     | 88       | -0.01        | 141.1    | 136      | -0.04        | 107.2    | 120      | 0.11         | 89.4     | 86       | -0.04        | 84.8     | 83       | -0.02        |
| Ga (ppm)  | 21.6     | 20       | -0.08        | 30.4     | 34       | 0.11         | 22.4     | 22       | -0.02        | 23.1     | 23       | 0.00         | 23.1     |          |              |
| Rb (ppm)  | 70       | 67       | -0.04        | 56.5     | 64       | 0.12         | 242.8    | 245      | 0.01         | 176      | 170      | -0.04        | 191.1    | 193      | 0.01         |
| Sr (ppm)  | 670.2    | 660      | -0.02        | 210.4    | 210      | 0.00         | 243.1    | 240      | -0.01        | 479.1    | 478      | 0.00         | 1.1      |          |              |
| Y (ppm)   | 20.9     | 20       | -0.04        | 60.3     | 61       | 0.01         | 24       | 28       | 0.14         | 13       | 11       | -0.18        | 50.9     | 47       | -0.08        |
| Zr (ppm)  | 216.9    | 227      | 0.04         | 479.9    | 452      | -0.06        | 535.2    | 550      | 0.03         | 322.3    | 309      | -0.04        | 216.8    | 226      | 0.04         |
| Nb (ppm)  | 15       | 15       | 0.00         | 102      | 98       | -0.04        | 25.5     | 27       | 0.06         | 14.4     | 12       | -0.20        | 66.2     | 67       | 0.01         |
| Ba (ppm)  | 1256     | 1230     | -0.02        | 1085     | 1070     | -0.01        | 1289     | 1340     | 0.04         | 1899     | 1880     | -0.01        |          |          |              |
| La (ppm)  | 33.2     | 38       | 0.13         | 74.9     | 71       | -0.05        | 172.6    | 180      | 0.04         | 97.7     | 89       | -0.10        | 27.3     | 35       | 0.22         |
| Ce (ppm)  | 69.6     | 67       | -0.04        | 135.2    | 129      | -0.05        | 397.7    | 410      | 0.03         | 162.3    | 160      | -0.01        | 71.5     | 78       | 0.08         |
| Nd (ppm)  | 30.1     | 33       | 0.09         | 57.4     | 62       | 0.07         | 208.9    | 200      | -0.04        | 55.3     | 55       | -0.01        | 35.2     | 35       | -0.01        |
| Th (ppm)  | 6.5      | 6.5      | 0.00         | 7.9      | 8.8      | 0.10         | 110.1    | 105      | -0.05        | 26.7     | 35       | 0.24         | 20.5     | 19.4     | -0.06        |
| U (ppm)   | 2        | 1.92     | -0.04        | 2.1      | 2.5      | 0.16         | 3.6      | 2.4      | -0.50        | 3.9      |          |              | 6.1      | 6.4      | 0.05         |
