# Supplementary material
Source: publisher figshare collection journal article supplement (https://gsapubs.figshare.com/articles/dataset/_/12534962)
Supplement: Supplementary file 1 [file 1]

## Sheet: Overview
Appendix C: Detailed 40Ar/39Ar Data
Notes on Appendix C:
Tabs in this Appendix are organized by Irradiation ID.
All reported ages are calculated relative to a Fish Canyon sanidine age of 28.02 Ma and a decay constant of λ = 5.543x10-10/yr (Steiger and Jäger, 1977).
* indicates grains excluded from calculation of inverse isochron age
Inverse isochron plots and atmospheric ratios used for each sample appear in Appendix D: Isochron Plots
Irradiation constants:
40Ar/39ArK Correction Factor:	0.00723	±	0.000784
38Ar/39ArK Correction Factor:	0.0127	±	1.7e-05
36Ar/37ArCa Correction Factor:	0.000284	±	4e-06
39Ar/37ArCa Correction Factor:	0.000709	±	2.21e-06

## Sheet: 12-02C
	Step	Power (%)	Time (s)	40Ar/39Ar	38Ar/39Ar	37Ar/39Ar	36Ar/39Ar	39ArK (mol)	%40Ar*	40Ar/39ArK	± 1σ	Age (Ma)	± 1σ	39Ar/40Ar	± 1σ	36Ar/40Ar	± 1σ	Cl/K	± 1σ	Ca/K	± 1σ	39Ar total err	Age total err (in Ma)
12-02C	1	30	30	5.07548	0.0128	0.00309	0.000918	5.73e-15	90.3982	4.79447	0.00966	16.5675	0.0332	0.197306	0.000284	0.000181	4.19e-06	2.65e-06	1.38e-05	0.00625	9.45e-05	5.95e-18	0.145134
12-02C	2	30	30	5.00675	0.0128	0.00429	0.000747	7.27e-15	92.1011	4.7768	0.00916	16.5067	0.0315	0.200019	0.000304	0.000149	3.44e-06	1e-06	1e-06	0.00866	0.000108	8.4e-18	0.14425
12-02C	3	30	30	4.84098	0.0127	0.00286	0.000178	4.37e-15	93.0099	4.78083	0.0117	16.5206	0.0402	0.206878	0.000387	3.67e-05	5.13e-06	9.74e-06	1.3e-05	0.00578	9.89e-05	3.67e-18	0.146503
12-02C	4	30	30	4.87543	0.0128	0.00363	0.000358	6.82e-15	93.9723	4.76155	0.00878	16.4543	0.0302089	0.205414	0.000304	7.34e-05	3.46e-06	2.42e-05	1.02e-05	0.00734	0.000107	8.06e-18	0.143536
12-02C	5	30	30	4.87939	0.0128	0.00831	0.00034	7.56e-15	94.4377	4.77126	0.00854	16.4877	0.0294	0.205247	0.000305	6.94e-05	3.13e-06	1.17e-05	1.1e-05	0.0168	0.000199	9.47e-18	0.143644
12-02C	6	30	30	4.86373	0.0127	0.00484	0.000306	5.8e-15	93.6431	4.76568	0.00936	16.4685	0.0322	0.205909	0.000313	6.26e-05	3.97e-06	1e-06	1e-06	0.00979	0.000138	6.04e-18	0.144087
12-02C	7	30	30	5.04771	0.0129	0.00438	0.000935	5.09e-15	89.7668	4.76159	0.0108	16.4544	0.037304	0.198393	0.000334	0.000185	4.5e-06	1.08e-05	1.3e-05	0.00885	0.000128	4.86e-18	0.145196
12-02C	8	30	30	4.81233	0.0127	0.00308	0.000157	7.95e-15	95.613	4.75835	0.00912	16.4433	0.0314	0.208112	0.000356	3.26e-05	2.77e-06	1e-06	1e-06	0.00622	7.92e-05	9.98e-18	0.143698
12-02C	9	30	30	4.839	0.0128	0.00351	0.000213	9.65e-15	95.8633	4.76862	0.00839	16.4786	0.0289	0.206963	0.000329	4.38e-05	2.35e-06	1.39e-05	1.04e-05	0.00709	9.32e-05	1.37e-17	0.143459
12-02C	10	30	30	4.89222	0.0127835	0.00297	0.000398	5.94e-15	93.2354	4.7664	0.00897	16.471	0.0308499	0.204708	0.000286	8.13e-05	4e-06	1.26e-05	1.13e-05	0.006	9.02e-05	6.03e-18	0.143811
12-02C	11	30	30	5.04793	0.0128	0.00456	0.000918	6.26e-15	90.6853	4.76708	0.00918	16.4733	0.0316	0.198385	0.000286	0.000182	3.74e-06	1e-06	1e-06	0.00921	0.000126	6.9e-18	0.143985
12-02C	12	30	30	4.91197	0.0128	0.00327	0.000426	6.31e-15	93.3346	4.77785	0.00913	16.5104	0.0314	0.203884	0.0003	8.67e-05	3.83e-06	1.41e-05	1.15e-05	0.0066	0.000101	7.17e-18	0.144258
12-02C	13	30	30	5.04289	0.0129	0.00351	0.000895	4.01e-15	88.8198	4.76885	0.0126	16.4794	0.0435	0.198583	0.000363	0.000177	5.77e-06	9.94e-06	1.32e-05	0.00709	0.000123	3.73e-18	0.147109
12-02C	14	30	30	4.94609	0.013	0.00308	0.000546	4.19e-15	90.8394	4.77618	0.0119	16.5046	0.0408	0.202475	0.000371	0.00011	5.2e-06	5.61e-05	1.36e-05	0.00622	0.000108	3.97e-18	0.146533
12-02C	15	30	30	4.93094	0.0129	0.00386	0.000515	5.58e-15	92.3552	4.77014	0.00965	16.4838	0.0332	0.203098	0.000308	0.000104	4.16e-06	2.68e-05	1.19e-05	0.0078	0.000115	5.59e-18	0.144437
12-02C	16	30	30	5.04439	0.0129	0.00304	0.000846	3.52e-15	88.3486	4.78489	0.0145832	16.5346	0.0502	0.198524	0.000436	0.000168	6.33e-06	2.32e-05	1.38e-05	0.00614	0.000114	3.31e-18	0.14966
12-02C	17	30	30	4.98982	0.0128	0.00322	0.000773	4.4e-15	89.8885	4.75206	0.0119176	16.4216	0.041	0.200699	0.000376	0.000155	4.98e-06	2.59e-06	1.29e-05	0.0065	0.000119	3.8e-18	0.145921
12-02C	18	30	30	4.90781	0.0127	0.00322	0.000441	7.65e-15	93.9088	4.76925	0.00839	16.4808	0.0288	0.204057	0.000291	8.98e-05	3.16e-06	1e-06	1e-06	0.0065	9.41e-05	8.78e-18	0.143475
12-02C	19	30	30	4.93487	0.0129	0.00323	0.000551	8.08e-15	93.4618	4.76344	0.00863	16.4608	0.0297	0.202937	0.000306	0.000112	3e-06	4.08e-05	1.04e-05	0.00652	9.52e-05	1.03e-17	0.143482
12-02C	20	30	30	4.90793	0.0128	0.00347	0.000429	4.06e-15	91.2672	4.77291	0.0115	16.4934	0.0394	0.204052	0.000349	8.73e-05	5.35e-06	1.35e-05	1.5e-05	0.00702	0.000112	3.76e-18	0.146069
12-02C	21	30	30	4.95545	0.012823	0.00739	0.000587	7.79e-15	93.1749	4.77364	0.00895	16.4959	0.0308	0.202092	0.000312	0.000118	3.16e-06	1.37e-05	1.12e-05	0.0149293	0.000174	9.85e-18	0.144001
12-02C	22	30	30	5.0934	0.0129	0.00287	0.00106	6.5e-15	90.1018	4.77028	0.00992	16.4843	0.0341	0.196611	0.00031	0.000208	3.86e-06	3.8e-06	1.18e-05	0.00581	8.74e-05	7.42e-18	0.144657
	TB-224			Inverse Isochron Age (Ma):	16.467
	Tuff of Oregon Canyon			Error (2s):	0.033
	J-Factor:	0.00192423		MSWD:	0.81
	err:	1.64816e-05		# of grains included:	22

## Sheet: 12-03C
	Step	Power (%)	Time (s)	40Ar/39Ar	38Ar/39Ar	37Ar/39Ar	36Ar/39Ar	39ArK (mol)	%40Ar*	40Ar/39ArK	± 1σ	Age (Ma)	± 1σ	39Ar/40Ar	± 1σ	36Ar/40Ar	± 1σ	Cl/K	± 1σ	Ca/K	± 1σ	39Ar total err	Age total err (in Ma)
12-03C	1	30	30	5.23954	0.0129677	0.00262252	0.00161367	6.05144e-15	86.9609	4.7505	0.00923708	16.4338	0.0318094	0.191121	0.000256548	0.000308406	3.86265e-06	1e-06	1e-06	0.00529749	8.25857e-05	6.08451e-18	0.143615
12-03C	2	30	30	5.83941	0.0129637	0.00819984	0.00388511	3.44442e-16	48.3476	4.67219	0.105359	16.1641	0.362876	0.171463	0.00191744	0.000666151	4.80997e-05	1e-06	1e-06	0.0165637	0.000915748	1.06444e-18	0.388146
12-03C	3	30	30	4.97134	0.0128819	0.00321163	0.000705497	5.05865e-15	90.7422	4.75345	0.00950235	16.4439	0.0327228	0.201447	0.000287933	0.00014212	4.26943e-06	1.69268e-05	1.29887e-05	0.0064875	0.000105125	4.72755e-18	0.143903
12-03C	4	30	30	5.21931	0.0129505	0.0140825	0.00154956	8.06629e-15	88.1676	4.74941	0.00914434	16.43	0.0314902	0.191863	0.000281667	0.000297303	3.24708e-06	1e-06	1e-06	0.0284466	0.000312287	1.00373e-17	0.143513
12-03C	5	30	30	4.95901	0.0129905	0.00489846	0.000593502	8.97336e-15	93.4434	4.77456	0.00867327	16.5166	0.0298665	0.201948	0.00031038	0.000119857	2.8198e-06	5.28614e-05	1.021e-05	0.00989488	0.00011877	1.24308e-17	0.143884
12-03C	6	30	30	5.1671	0.0129487	0.00291604	0.00136546	6.36765e-15	88.3422	4.75217	0.00952489	16.4395	0.0328005	0.193804	0.000276704	0.000264631	3.93713e-06	9.63821e-07	1.25141e-05	0.0058904	8.75036e-05	6.68913e-18	0.143885
12-03C	7	30	30	5.62258	0.0131597	0.00272918	0.00305453	2.3439e-15	75.8727	4.70334	0.0239582	16.2714	0.0825117	0.178084	0.000562984	0.000543963	9.74938e-06	1e-06	1e-06	0.00551294	0.00013598	2.18363e-18	0.161362
12-03C	8	30	30	6.79578	0.014058	0.00319466	0.00690678	3.76488e-15	66.0603	4.72637	0.0166616	16.3507	0.0573796	0.147307	0.000208652	0.00101742	6.86628e-06	1.88117e-05	1.52166e-05	0.00645322	0.000115058	3.45107e-18	0.150695
12-03C	9	30	30	4.85805	0.0127073	0.00314462	0.000355678	4.27918e-15	91.705	4.74461	0.0103847	16.4135	0.0357618	0.206151	0.00032765	7.33236e-05	4.80508e-06	1e-06	1e-06	0.00635212	0.000114357	3.92273e-18	0.144375
12-03C	10	30	30	4.88572	0.0127797	0.00345564	0.000387319	5.64879e-15	92.9352	4.76284	0.0101009	16.4763	0.0347835	0.204982	0.000369193	7.93933e-05	3.42362e-06	5.23782e-06	1.24763e-05	0.00698039	0.00010693	5.66935e-18	0.144652
12-03C	11	30	30	4.90179	0.0127949	0.00407907	0.000407165	4.15216e-15	91.3108	4.77298	0.0120579	16.5112	0.0415215	0.204309	0.000397395	8.31873e-05	5.06623e-06	8.41302e-06	1.36315e-05	0.00823972	0.0001323	3.49228e-18	0.146703
12-03C	12	30	30	4.96167	0.0128033	0.00280476	0.000702549	7.1984e-15	92.1409	4.74467	0.00954526	16.4137	0.0328711	0.20184	0.000329168	0.000141802	3.44339e-06	1e-06	1e-06	0.00566561	8.22555e-05	8.2032e-18	0.143687
12-03C	13	30	30	4.88757	0.0126848	0.00292781	0.000333545	3.9777e-15	91.4584	4.78073	0.0142117	16.5379	0.0489376	0.204905	0.00049994	6.83449e-05	5.3269e-06	1e-06	1e-06	0.00591417	0.000120538	4.20396e-18	0.149185
12-03C	14	30	30	5.49667	0.0131563	0.00394331	0.0024353	4.09705e-15	81.7364	4.76231	0.0121607	16.4745	0.0418764	0.182169	0.000275228	0.000443636	5.46758e-06	2.58532e-06	1.39206e-05	0.00796549	0.000123425	3.78877e-18	0.146505
12-03C	15	30	30	4.98293	0.0128951	0.00351044	0.000642098	4.50055e-15	90.5519	4.78397	0.0104656	16.549	0.0360376	0.200978	0.000325143	0.000129047	4.50681e-06	2.38907e-05	1.36736e-05	0.00709108	0.000116004	4.55647e-18	0.145556
12-03C	16	30	30	4.91713	0.0128472	0.00314232	0.000481376	3.09708e-15	89.0311	4.76616	0.0163627	16.4877	0.0563461	0.203671	0.000530614	9.80424e-05	6.96521e-06	1.90289e-05	1.55459e-05	0.00634749	0.000130177	2.85116e-18	0.151382
12-03C	17	30	30	4.9273	0.0127764	0.00286308	0.00053801	5.74207e-15	92.1906	4.75942	0.00976143	16.4645	0.0336146	0.20325	0.000332721	0.00010935	3.75864e-06	1e-06	1e-06	0.00578341	9.16692e-05	5.87573e-18	0.144278
12-03C	18	30	30	4.97442	0.0128075	0.00313485	0.00074755	6.74729e-15	91.6772	4.74398	0.00929773	16.4113	0.0320187	0.201322	0.000309063	0.000150498	3.5945e-06	1e-06	1e-06	0.00633241	0.00010052	7.24925e-18	0.143475
12-03C	19	30	30	6.04078	0.0135216	0.00339275	0.00438645	8.5065e-15	76.1964	4.72388	0.0114025	16.3421	0.0392684	0.16574	0.000244219	0.000727011	4.10561e-06	1.86266e-06	1.02945e-05	0.00685336	9.76216e-05	1.1496e-17	0.1447
12-03C	20	30	30	5.00002	0.0128399	0.0111742	0.000753336	5.33917e-15	90.7632	4.76786	0.0108237	16.4935	0.0372721	0.200289	0.000360145	0.000150885	4.06495e-06	2.78216e-06	1.16244e-05	0.0225719	0.000255331	5.12421e-18	0.145412
12-03C	21	30	30	5.33049	0.0131066	0.00329435	0.00190062	1.9188e-15	78.8084	4.75578	0.022177	16.452	0.0763693	0.187855	0.000494126	0.000357041	1.08612e-05	1.6757e-05	2.12181e-05	0.00665458	0.000185559	1.80348e-18	0.159652
12-03C	22	30	30	5.12222	0.0128959	0.00384669	0.00119782	2.32676e-15	83.42	4.75734	0.0193757	16.4573	0.0667227	0.195504	0.000469309	0.000234179	9.83064e-06	1e-06	1e-06	0.00777032	0.00016396	2.31819e-18	0.15531
	MC407B			Inverse Isochron Age (Ma):	16.484
	Tuff of Oregon Canyon			Error (2s):	0.022
	J-Factor:	0.0019268		MSWD:	1.41
	err:	1.65036e-05		# of grains included:	22

## Sheet: 12-04C
	Step	Power (%)	Time (s)	40Ar/39Ar	38Ar/39Ar	37Ar/39Ar	36Ar/39Ar	39ArK (mol)	%40Ar*	40Ar/39ArK	± 1σ	Age (Ma)	± 1σ	39Ar/40Ar	± 1σ	36Ar/40Ar	± 1σ	Cl/K	± 1σ	Ca/K	± 1σ	39Ar total err	Age total err (in Ma)
12-04C	1	30	30	4.81038	0.0126601	0.00312647	0.000174212	8.04735e-15	95.4999	4.75112	0.0075312	16.4573	0.0259685	0.208197	0.000287433	3.62705e-05	2.49016e-06	1e-06	1e-06	0.00631547	8.76499e-05	1.01532e-17	0.142631
12-04C	2	30	30	4.83031	0.0127364	0.00283812	0.000258985	6.91812e-15	94.5027	4.74574	0.00719972	16.4387	0.0248258	0.207337	0.000253515	5.36971e-05	2.86889e-06	1e-06	1e-06	0.005733	8.67516e-05	7.5171e-18	0.142272
12-04C	3	30	30	4.91807	0.0127425	0.00323822	0.000527395	6.43197e-15	92.766	4.75336	0.0082791	16.465	0.0285473	0.203632	0.000278898	0.000107394	3.29576e-06	1e-06	1e-06	0.0065412	9.64478e-05	6.78037e-18	0.143187
12-04C	4	30	30	4.95714	0.0128124	0.00399631	0.00063789	5.41652e-15	91.4974	4.75944	0.00856238	16.486	0.0295237	0.202025	0.000268718	0.000128869	3.70794e-06	1.19316e-06	1.22455e-05	0.00807254	0.000130765	5.40592e-18	0.143559
12-04C	5	30	30	4.95382	0.012845	0.00335893	0.000564779	4.81689e-15	91.3767	4.77795	0.0105699	16.5498	0.0364445	0.20216	0.000338092	0.000114176	4.45885e-06	1.40504e-05	1.35702e-05	0.00678503	0.000107209	4.28674e-18	0.145664
12-04C	6	30	30	4.86898	0.0128263	0.00386187	0.000336743	7.07158e-15	94.1632	4.7612	0.00756449	16.492	0.0260828	0.205688	0.000264996	6.9264e-05	2.92328e-06	2.07928e-05	1.03327e-05	0.00780098	0.000106928	7.84089e-18	0.142941
12-04C	7	30	30	4.85231	0.0127184	0.00346071	0.000270153	5.31016e-15	93.387	4.76441	0.00810546	16.5031	0.027948	0.206396	0.000245759	5.57583e-05	3.93636e-06	1e-06	1e-06	0.00699063	0.000104793	4.90369e-18	0.143386
12-04C	8	30	30	5.22852	0.0129638	0.00258875	0.0016408	6.33978e-15	87.0142	4.73138	0.00891912	16.3892	0.0307554	0.191524	0.000252865	0.000314253	3.65405e-06	1e-06	1e-06	0.00522928	8.74645e-05	6.56558e-18	0.143016
12-04C	9	30	30	4.93653	0.012901	0.00338392	0.000513878	3.67061e-15	90.1539	4.77586	0.0116409	16.5426	0.0401374	0.202869	0.000335231	0.00010425	5.6534e-06	3.22311e-05	1.43349e-05	0.00683553	0.00013222	3.39504e-18	0.146573
12-04C	10	30	30	4.97592	0.0129041	0.00318211	0.000663562	5.22321e-15	91.223	4.77055	0.0102248	16.5243	0.0352552	0.201261	0.000317312	0.000133549	4.4345e-06	2.52646e-05	1.18455e-05	0.00642786	0.000103165	4.80633e-18	0.145161
12-04C	11	30	30	6.20976	0.0136243	0.00330906	0.00475634	4.05971e-15	73.1694	4.78242	0.0119573	16.5652	0.0412278	0.161225	0.000178664	0.00076684	5.35133e-06	1.09923e-05	1.30956e-05	0.00668431	0.000117738	3.64582e-18	0.14706
12-04C	12	30	30	4.86534	0.0126317	0.00317093	0.000295432	5.14272e-15	93.1084	4.76989	0.00926426	16.522	0.0319432	0.205842	0.00031133	6.08122e-05	3.89115e-06	1e-06	1e-06	0.00640527	0.000100545	4.71859e-18	0.144374
12-04C	13	30	30	4.82369	0.0126949	0.00308489	0.000153438	6.63756e-15	94.9705	4.77063	0.0073423	16.5246	0.0253162	0.207622	0.000261305	3.18572e-05	2.88126e-06	1e-06	1e-06	0.00623149	9.78473e-05	7.33382e-18	0.143075
12-04C	14	30	30	4.83391	0.0126163	0.00323324	0.000180709	3.4994e-15	91.5632	4.77271	0.0112335	16.5317	0.0387328	0.207182	0.000317251	3.74398e-05	5.87055e-06	1e-06	1e-06	0.00653114	0.000132848	2.93024e-18	0.146106
12-04C	15	30	30	4.83737	0.0127427	0.00408896	0.000224171	3.27202e-15	90.8616	4.76319	0.0140661	16.4989	0.0485007	0.207034	0.000461243	4.6411e-05	6.28234e-06	3.51815e-06	1.59673e-05	0.00825969	0.000151725	2.9317e-18	0.14873
12-04C	16	30	30	6.40821	0.0138361	0.00763793	0.00553505	2.63907e-15	68.7153	4.74836	0.0195027	16.4478	0.067248	0.156226	0.000276871	0.000864721	8.4411e-06	2.90003e-05	1.82251e-05	0.0154286	0.000226637	2.14474e-18	0.155464
12-04C	17	30	30	5.55332	0.0131512	0.00303503	0.00270399	5.20398e-15	81.5915	4.73874	0.00967291	16.4146	0.0333542	0.180308	0.000205807	0.00048755	4.45173e-06	1e-06	1e-06	0.00613075	0.000103318	4.88015e-18	0.143807
12-04C	18	30	30	4.84611	0.0128436	0.0033869	0.000215639	3.00213e-15	90.2994	4.77449	0.0119598	16.5379	0.041237	0.20666	0.000295784	4.45639e-05	6.74923e-06	3.18951e-05	1.59506e-05	0.00684154	0.000136377	2.42477e-18	0.146839
12-04C	19	30	30	4.87726	0.0127959	0.00343101	0.000336413	5.09497e-15	92.8424	4.76957	0.00872387	16.5209	0.03008	0.205338	0.000272152	6.90785e-05	4.03728e-06	1.23758e-05	1.20964e-05	0.00693064	0.000102816	4.66763e-18	0.143964
12-04C	20	30	30	5.55558	0.013167	0.00337225	0.00260637	3.30684e-15	80.0872	4.77016	0.0134088	16.5229	0.0462335	0.180234	0.000252647	0.000469757	6.6264e-06	1e-06	1e-06	0.00681194	0.000127076	2.94889e-18	0.1482
12-04C	21	30	30	4.89655	0.0128141	0.0024616	0.000412482	3.69608e-15	90.6978	4.76615	0.0122665	16.5091	0.0422952	0.204528	0.000369777	8.43642e-05	5.82784e-06	1.34499e-05	1.52566e-05	0.00497244	0.000104981	3.05207e-18	0.146907
12-04C	22	30	30	6.68638	0.0139407	0.00314854	0.0064525	4.63016e-15	68.1622	4.75261	0.0126896	16.4625	0.0437553	0.14972	0.000162516	0.000966068	5.32672e-06	1.0045e-05	1.33716e-05	0.00636005	0.000107057	4.214e-18	0.146956
	ML-304			Inverse Isochron Age (Ma):	16.494
	Tuff of Oregon Canyon			Error (2s):	0.017
	J-Factor:	0.0019293		MSWD:	2.07
	err:	1.65251e-05		# of grains included:	22

## Sheet: 12-05C
	Step	Power (%)	Time (s)	40Ar/39Ar	38Ar/39Ar	37Ar/39Ar	36Ar/39Ar	39ArK (mol)	%40Ar*	40Ar/39ArK	± 1σ	Age (Ma)	± 1σ	39Ar/40Ar	± 1σ	36Ar/40Ar	± 1σ	Cl/K	± 1σ	Ca/K	± 1σ	39Ar total err	Age total err (in Ma)
12-05C	1	30	30	4.80909	0.0127	0.00453	0.000206	1.1e-14	96.2719	4.74042	0.00816	16.4309	0.0281	0.208253	0.000342	4.28e-05	1.42e-06	1e-06	1e-06	0.00915	0.000109	1.73e-17	0.142822
12-05C	2	30	30	4.94772	0.0129	0.00283	0.000702	5.84e-15	91.5984	4.73075	0.0091	16.3975	0.0314	0.202409	0.000334	0.000142	2.76e-06	9.2e-06	1.14e-05	0.00571	9.26e-05	5.81e-18	0.143227
12-05C	3	30	30	4.92829	0.0128	0.00295	0.000657	1.01e-14	93.4832	4.72484	0.00793	16.3771	0.0273694	0.203209	0.000306	0.000134	1.92e-06	1e-06	1e-06	0.00595	8.27e-05	1.47e-17	0.142225
12-05C	4	30	30	6.21625	0.0136	0.00312	0.00505	9.66e-15	74.0459	4.69997	0.0107	16.2913	0.0369	0.161056	0.000236	0.000814	3.26e-06	1e-06	1e-06	0.00631	8.33e-05	1.36e-17	0.143666
12-05C	5	30	30	4.85947	0.0127	0.00399	0.000302	3.94e-15	91.9187	4.76213	0.00887	16.5058	0.0305922	0.206091	0.000281	6.22e-05	4.08e-06	1.29e-06	1.32e-05	0.00805	0.000139	3.12e-18	0.143946
12-05C	6	30	30	4.8267	0.0127	0.0027	0.000235	3.33e-15	91.2064	4.74932	0.009	16.4616	0.031	0.207492	0.000293	4.87e-05	4.09e-06	1e-06	1e-06	0.00546	0.000115	2.96e-18	0.143677
12-05C	7	30	30	4.82726	0.0128	0.00329	0.000307	4.25e-15	92.2596	4.72849	0.00788	16.3897	0.0272	0.207468	0.000255	6.36e-05	3.61e-06	4.29e-06	1.24e-05	0.00665	0.000122	3.79e-18	0.142297
12-05C	8	30	30	4.90154	0.0127	0.00286	0.000506	3.96e-15	90.8444	4.74328	0.00794	16.4407	0.0274	0.20432	0.000241	0.000103	3.74e-06	1e-06	1e-06	0.00578	0.000101	3.46e-18	0.142761
12-05C	9	30	30	5.03944	0.0129	0.00268	0.000952	5.23e-15	89.8954	4.74795	0.0081	16.4568	0.0279325	0.19872	0.000248	0.000189	3.41e-06	8.99e-06	1.18e-05	0.00541	9.26e-05	4.91e-18	0.142998
12-05C	10	30	30	4.85698	0.0127	0.00243	0.000314	3.34e-15	90.835	4.75584	0.0111	16.4841	0.0381781	0.206197	0.000382	6.48e-05	4.45e-06	1e-06	1e-06	0.00492	0.000106	2.84e-18	0.14557
12-05C	11	30	30	4.86766	0.0127	0.00263	0.000388	2.99e-15	89.6743	4.74449	0.0132	16.4449	0.0454	0.205744	0.000474	7.99e-05	4.78e-06	1e-06	1e-06	0.0053103	0.000126	2.68e-18	0.147323
12-05C	12	30	30	10.312	0.0162	0.00278	0.0189	3.16e-15	43.6165	4.67232	0.025	16.1959	0.0864	0.097	0.000132	0.00183	7.19e-06	1e-06	1e-06	0.00561	0.000128	2.88e-18	0.162839
12-05C	13	30	30	5.01562	0.0129	0.00275	0.000855	5.12e-15	90.3097	4.75313	0.00885	16.4747	0.0305	0.199665	0.000285	0.000171	3.49e-06	2.43e-06	1.21e-05	0.00555	9.55e-05	5.09e-18	0.14368
12-05C	14	30	30	4.89511	0.012785	0.00454	0.000474	9.43e-15	94.3708	4.74625	0.00757	16.451	0.0261	0.204589	0.000296	9.7e-05	1.86e-06	2.16e-06	9.38e-06	0.00916	0.000111	1.3e-17	0.142603
12-05C	15	30	30	1297.24	0.850147	0.0228	4.50926	5.81e-17	0	-49.0928	9.28804	0	0	0.000771	3.73e-06	0.00348	2.44e-05	1e-06	1e-06	0.0461	0.00366	2.8e-19	0
12-05C	16	30	30	5.11259	0.0128	0.00324	0.00117	3.28e-15	86.4972	4.7561	0.0118303	16.485	0.0408	0.195873	0.00037	0.000229	4.51e-06	1e-06	1e-06	0.00654	0.00012	2.94e-18	0.146291
12-05C	17	30	30	5.30577	0.013	0.00266	0.00185	4.51e-15	84.9779	4.74748	0.00998	16.4552	0.0344	0.188732	0.000275	0.000348	4.02e-06	1e-06	1e-06	0.00537	9.49e-05	4.11e-18	0.144397
12-05C	18	30	30	4.83144	0.0127	0.00406	0.000275	6.94e-15	94.5795	4.74208	0.0068	16.4366	0.0235	0.207288	0.00026	5.7e-05	2.17e-06	1e-06	1e-06	0.0082	0.000108	7.71e-18	0.142023
12-05C	19	30	30	4.85536	0.0128	0.00531	0.000284	4.18e-15	92.3438	4.76332	0.0089	16.5099	0.0307074	0.206266	0.000307	5.86e-05	3.6e-06	1.98e-05	1.35e-05	0.0107	0.000162	3.62e-18	0.144005
12-05C	20	30	30	4.90992	0.0128	0.0041	0.000513	4.54e-15	91.5294	4.74944	0.00848	16.462	0.0293	0.20397	0.000269	0.000105	3.76e-06	8.9e-06	1.25e-05	0.00829	0.000128	4.03e-18	0.143307
12-05C	21	30	30	4.8857	0.0128	0.00264	0.00043	2.39e-15	87.7318	4.75021	0.016	16.4646	0.0551	0.204983	0.000566	8.8e-05	5.89e-06	5.35e-06	1.8e-05	0.00534	0.00013	2.06e-18	0.15074
12-05C	22	30	30	7.69715	0.0146	0.00287	0.0102	5.86e-15	58.6639	4.64227	0.0133	16.0922	0.0459	0.130041	0.000138	0.00133	4.79e-06	1e-06	1e-06	0.0058	9.07e-05	5.66e-18	0.144622
	TB-444			Inverse Isochron Age (Ma):	16.461
	Tuff of Oregon Canyon			Error (2s):	0.015
	J-Factor:	0.00193052		MSWD:	2.48
	err:	1.65355e-05		# of grains included:	22

## Sheet: 12-06C
	Step	Power (%)	Time (s)	40Ar/39Ar	38Ar/39Ar	37Ar/39Ar	36Ar/39Ar	39ArK (mol)	%40Ar*	40Ar/39ArK	± 1σ	Age (Ma)	± 1σ	39Ar/40Ar	± 1σ	36Ar/40Ar	± 1σ	Cl/K	± 1σ	Ca/K	± 1σ	39Ar total err	Age total err (in Ma)
12-06C	1	30	30	5.01463	0.0130444	0.00364456	0.000862067	8.07689e-15	91.8891	4.75	0.0073922	16.4844	0.0255371	0.199705	0.000258691	0.000172159	2.38203e-06	5.37596e-05	8.96293e-06	0.00736202	9.54175e-05	9.84452e-18	0.142779
12-06C	2	30	30	4.91552	0.012906	0.00438014	0.000593338	5.3741e-15	91.9033	4.73112	0.00714462	16.4192	0.0246827	0.203738	0.000231291	0.000120885	3.05461e-06	2.94526e-05	1.22513e-05	0.00884788	0.000128542	5.16292e-18	0.142084
12-06C	3	30	30	4.80577	0.0127803	0.00306624	0.000235295	6.54584e-15	94.6302	4.72827	0.00753177	16.4094	0.0260203	0.208397	0.000283043	4.90349e-05	2.63587e-06	1.3338e-05	1.09478e-05	0.0061938	9.09329e-05	6.94574e-18	0.142241
12-06C*	4	30	30	8.59139	0.0152302	0.00306249	0.0132183	5.3906e-15	52.5618	4.63758	0.0169718	16.096	0.0586432	0.116494	0.000112763	0.00153984	5.96327e-06	1.38715e-05	1.1832e-05	0.00618623	0.000107468	4.82341e-18	0.149192
12-06C	5	30	30	8.58928	0.015293	0.00463527	0.0130375	9.05417e-15	53.7332	4.68942	0.015418	16.2751	0.0532693	0.116523	0.000154968	0.00151916	4.52184e-06	4.07082e-05	1.01564e-05	0.00936325	0.000113269	1.18766e-17	0.14858
12-06C	6	30	30	4.99213	0.0129019	0.00344268	0.000859608	9.32963e-15	92.2401	4.72823	0.00780936	16.4092	0.0269793	0.200606	0.000290261	0.000172443	2.02692e-06	1.44163e-05	9.03092e-06	0.00695421	9.19695e-05	1.25579e-17	0.142418
12-06C	7	30	30	5.165	0.0129733	0.00417387	0.00147241	8.34241e-15	88.7749	4.71813	0.00806874	16.3743	0.0278759	0.193883	0.000263252	0.000285475	2.63113e-06	2.18455e-06	9.70081e-06	0.00843121	0.000110413	1.05689e-17	0.142301
12-06C	8	30	30	4.89129	0.0127341	0.0106304	0.000463599	5.11551e-15	92.4092	4.74563	0.010118	16.4693	0.0349538	0.204748	0.000375474	9.49211e-05	3.23245e-06	1e-06	1e-06	0.0214733	0.000275197	4.78634e-18	0.144636
12-06C	9	30	30	5.71731	0.0133356	0.00300875	0.00324036	4.8584e-15	79.382	4.74259	0.0116466	16.4588	0.0402351	0.175129	0.00027583	0.000567482	4.43175e-06	1.02023e-05	1.26722e-05	0.00607767	0.00011102	4.52946e-18	0.145917
12-06C*	10	30	30	12.4081	0.0176072	0.00725843	0.026584	7.50547e-15	35.4977	4.46365	0.0229312	15.4949	0.0792615	0.0806397	9.21553e-05	0.00214373	5.45066e-06	1e-06	1e-06	0.014662	0.000174347	8.51284e-18	0.154041
12-06C	11	30	30	5.02319	0.0128154	0.0033143	0.000970855	9.66389e-15	91.7251	4.72608	0.0083536	16.4018	0.0288596	0.199364	0.00030305	0.000193554	2.29776e-06	1e-06	1e-06	0.00669489	9.11118e-05	1.36277e-17	0.142724
12-06C	12	30	30	4.87566	0.0127668	0.00336415	0.000418005	6.32371e-15	93.5038	4.74361	0.00729681	16.4623	0.0252079	0.205406	0.000251949	8.58606e-05	2.8868e-06	1e-06	1e-06	0.00679558	9.91974e-05	6.54289e-18	0.142537
12-06C	13	30	30	4.97745	0.0128501	0.00744956	0.000803033	7.60925e-15	92.0034	4.73044	0.00827877	16.4168	0.0286009	0.201199	0.000299729	0.00016157	2.50732e-06	3.01913e-06	1.07909e-05	0.0150481	0.000172975	8.98093e-18	0.142797
12-06C	14	30	30	4.94948	0.0127984	0.00289118	0.000691829	6.716e-15	92.2153	4.73568	0.00713648	16.4349	0.0246543	0.202338	0.000243434	0.000139983	2.67971e-06	1e-06	1e-06	0.00584017	9.16607e-05	7.28135e-18	0.142211
12-06C*	15	30	30	10.8151	0.0172458	0.0133523	0.0208663	4.80287e-15	41.3338	4.5778	0.0218002	15.8894	0.0753356	0.0925254	9.32678e-05	0.00193066	6.16679e-06	0.000172745	1.50477e-05	0.0269717	0.000306596	4.47709e-18	0.154974
12-06C	16	30	30	5.14562	0.0129979	0.00466804	0.00134372	4.99053e-15	87.7922	4.73717	0.0083976	16.4401	0.029011	0.194614	0.000248189	0.000261507	3.43931e-06	1.57261e-05	1.15746e-05	0.00942943	0.000130647	4.97343e-18	0.143073
12-06C	17	30	30	4.86508	0.0126635	0.00309841	0.000371134	4.21007e-15	91.9655	4.74702	0.00854114	16.4741	0.0295064	0.205853	0.000268345	7.6399e-05	3.95291e-06	1e-06	1e-06	0.00625879	0.000107365	3.87051e-18	0.143457
12-06C	18	30	30	5.08216	0.0128951	0.00527526	0.0011477	2.48732e-15	84.7418	4.73225	0.016242	16.4231	0.0561116	0.197047	0.000495135	0.000226152	6.66308e-06	1e-06	1e-06	0.010656	0.000186085	2.09123e-18	0.150786
12-06C	19	30	30	4.84404	0.0127266	0.00274552	0.000231868	3.67462e-15	91.968	4.76757	0.01151	16.5451	0.0397611	0.206748	0.00040409	4.79384e-05	4.5476e-06	1e-06	1e-06	0.00554595	0.000122611	3.03817e-18	0.146491
12-06C	20	30	30	4.93277	0.0127919	0.00293943	0.000620084	5.68343e-15	92.0011	4.74038	0.00728132	16.4512	0.0251545	0.203024	0.000228491	0.000125892	3.2134e-06	1e-06	1e-06	0.00593765	9.43416e-05	5.35177e-18	0.142434
12-06C	21	30	30	4.87775	0.0127161	0.00361188	0.000445345	8.31232e-15	94.2229	4.73754	0.00849947	16.4414	0.0293629	0.205318	0.000334458	9.14373e-05	2.10166e-06	1e-06	1e-06	0.00729599	9.10032e-05	1.04401e-17	0.143156
12-06C	22	30	30	7.05182	0.0140827	0.00292335	0.00789644	4.05387e-15	63.6819	4.68693	0.0156538	16.2665	0.054084	0.141953	0.000183941	0.00112093	6.21811e-06	1e-06	1e-06	0.00590516	0.000106689	3.52749e-18	0.148806
	TB-429			Inverse Isochron Age (Ma):	16.45
	Tuff of Oregon Canyon			Error (2s):	0.015
	J-Factor:	0.00193292		MSWD:	1.62
	err:	1.6556e-05		# of grains included:	19

## Sheet: 12-07C
	Step	Power (%)	Time (s)	40Ar/39Ar	38Ar/39Ar	37Ar/39Ar	36Ar/39Ar	39ArK (mol)	%40Ar*	40Ar/39ArK	± 1σ	Age (Ma)	± 1σ	39Ar/40Ar	± 1σ	36Ar/40Ar	± 1σ	Cl/K	± 1σ	Ca/K	± 1σ	39Ar total err	Age total err (in Ma)
12-07C	1	30	30	4.86911	0.0127283	0.00311047	0.000410497	5.61714e-15	93.1862	4.7393	0.00824349	16.4703	0.0285178	0.205682	0.000271845	8.44319e-05	3.559e-06	1e-06	1e-06	0.00628316	9.58298e-05	5.44516e-18	0.143225
12-07C	2	30	30	4.82509	0.0126443	0.00796004	0.000252715	5.4293e-15	93.9214	4.74239	0.00796738	16.4809	0.0275624	0.207562	0.000275154	5.24539e-05	3.31207e-06	1e-06	1e-06	0.0160793	0.000194144	5.13214e-18	0.143126
12-07C	3	30	30	4.84047	0.0128656	0.00303035	0.000309792	4.4426e-15	92.6918	4.74073	0.010241	16.4752	0.035428	0.206901	0.000353979	6.40965e-05	4.18822e-06	3.30917e-05	1.19652e-05	0.00612132	9.65834e-05	4.27835e-18	0.1448
12-07C	4	30	30	4.84784	0.0127639	0.00332584	0.000380505	8.03451e-15	94.5518	4.72699	0.00766455	16.4276	0.0265156	0.206586	0.000284771	7.8607e-05	2.61164e-06	1.21996e-06	9.88467e-06	0.0067182	9.58811e-05	9.76367e-18	0.142485
12-07C	5	30	30	4.79083	0.0126269	0.00348816	0.000132899	4.25507e-15	93.4403	4.74391	0.00927268	16.4862	0.0320779	0.209048	0.000317359	2.77822e-05	4.0373e-06	1e-06	1e-06	0.00704608	0.000114184	3.90462e-18	0.144108
12-07C	6	30	30	5.06744	0.0128778	0.00341466	0.00103398	4.1477e-15	88.6312	4.75148	0.0138986	16.5124	0.04808	0.197621	0.000457372	0.000204336	4.9764e-06	1e-06	1e-06	0.00689761	0.000117378	3.59809e-18	0.148701
12-07C	7	30	30	7.26038	0.0142896	0.00309542	0.00855036	1.11078e-14	63.7757	4.70026	0.014018	16.3352	0.048498	0.137871	0.000217256	0.00117885	4.18297e-06	1e-06	1e-06	0.00625275	8.23308e-05	1.72651e-17	0.147417
12-07C	8	30	30	4.82597	0.0127354	0.00293819	0.000314526	4.3965e-15	92.5912	4.72482	0.012163	16.4201	0.0420782	0.207524	0.000467435	6.52716e-05	3.81814e-06	1e-06	1e-06	0.00593514	0.000107371	4.12779e-18	0.146122
12-07C	9	30	30	4.85563	0.0127316	0.00281963	0.000379704	6.29234e-15	93.7793	4.73502	0.00755193	16.4554	0.0261256	0.206254	0.000261784	7.83156e-05	3.02573e-06	1e-06	1e-06	0.00569564	8.81739e-05	6.49908e-18	0.142644
12-07C	10	30	30	5.35095	0.0132765	0.00363014	0.0020962	4.01605e-15	83.4411	4.71784	0.0114035	16.396	0.0394513	0.187136	0.000262345	0.000392276	5.41681e-06	5.35957e-05	1.41442e-05	0.00733287	0.000139277	3.61545e-18	0.14519
12-07C	11	30	30	4.82293	0.0126639	0.0036862	0.000221299	4.30315e-15	93.0255	4.74961	0.00940176	16.5059	0.0325241	0.207655	0.000319754	4.59538e-05	4.02043e-06	1e-06	1e-06	0.00744613	0.000118657	3.94124e-18	0.144371
12-07C	12	30	30	4.9263	0.0127108	0.00272839	0.000570461	4.71689e-15	91.5988	4.74874	0.00976933	16.5029	0.0337957	0.203291	0.000314766	0.000115969	4.16949e-06	1e-06	1e-06	0.00551136	0.000111252	4.19087e-18	0.144637
12-07C*	13	30	30	7.08674	0.0142041	0.00396678	0.00813415	6.55009e-15	63.9515	4.65088	0.0132281	16.1643	0.0457695	0.141253	0.000164431	0.00114897	5.0747e-06	1e-06	1e-06	0.0080129	0.000105437	6.95361e-18	0.145167
12-07C	14	30	30	4.82856	0.0127517	0.00361997	0.000310109	4.25033e-15	92.4509	4.72873	0.00950597	16.4337	0.0328859	0.207412	0.000300152	6.43205e-05	4.48607e-06	1.52228e-06	1.43022e-05	0.00731234	0.000121922	3.9007e-18	0.143856
12-07C	15	30	30	4.86633	0.0128316	0.00367771	0.000442561	4.85069e-15	92.3739	4.72695	0.00809154	16.4275	0.0279928	0.2058	0.000261904	9.10791e-05	3.599e-06	1.67247e-05	1.34453e-05	0.00742897	0.000131608	4.4201e-18	0.142766
12-07C	16	30	30	4.82736	0.0127016	0.00338205	0.000284464	6.74756e-15	94.5581	4.73519	0.00829694	16.456	0.0287029	0.207464	0.000305496	5.90159e-05	2.98682e-06	1e-06	1e-06	0.00683174	9.86678e-05	7.9501e-18	0.143143
12-07C	17	30	30	4.95041	0.0127767	0.0049051	0.000723439	8.76518e-15	92.8856	4.72717	0.00813616	16.4282	0.0281471	0.2023	0.000296168	0.000146352	2.52845e-06	1e-06	1e-06	0.0099083	0.000119397	1.15011e-17	0.142802
12-07C	18	30	30	4.78525	0.0126706	0.00287195	0.000116636	4.212e-15	93.4774	4.74319	0.00948667	16.4837	0.0328182	0.209292	0.000308573	2.4411e-05	4.45408e-06	1e-06	1e-06	0.00580135	0.000108546	3.8719e-18	0.144254
12-07C	19	30	30	4.84065	0.0127724	0.00310019	0.000303648	4.19186e-15	92.4343	4.74274	0.00937859	16.4821	0.0324443	0.206894	0.000300571	6.28228e-05	4.30902e-06	7.59045e-06	1.34827e-05	0.00626239	0.000107917	3.63207e-18	0.144156
12-07C	20	30	30	4.81676	0.0127057	0.0028777	0.000261621	4.23147e-15	92.6939	4.73141	0.00916293	16.4429	0.031699	0.207921	0.000286351	5.43964e-05	4.40971e-06	1e-06	1e-06	0.00581295	9.6027e-05	3.45288e-18	0.143666
12-07C	21	30	30	4.83509	0.0127703	0.0030468	0.0002828	5.99766e-15	94.153	4.74341	0.00767723	16.4844	0.0265586	0.207132	0.000271232	5.85769e-05	3.02284e-06	8.08079e-06	1.11975e-05	0.00615453	9.70703e-05	6.38012e-18	0.142966
	TB-433			Inverse Isochron Age (Ma):	16.468
	Tuff of Oregon Canyon			Error (2s):	0.015
	J-Factor:	0.00193559		MSWD:	0.85
	err:	1.65789e-05		# of grains included:	20

## Sheet: 12-09C
	Step	Power (%)	Time (s)	40Ar/39Ar	38Ar/39Ar	37Ar/39Ar	36Ar/39Ar	39ArK (mol)	%40Ar*	40Ar/39ArK	± 1σ	Age (Ma)	± 1σ	39Ar/40Ar	± 1σ	36Ar/40Ar	± 1σ	Cl/K	± 1σ	Ca/K	± 1σ	39Ar total err	Age total err (in Ma)
12-09C	1	30	30	5.04884	0.0128643	0.00364506	0.00101952	7.66489e-15	91.0646	4.7372	0.00814166	16.5025	0.028233	0.19835	0.000271031	0.000202222	2.89587e-06	1e-06	1e-06	0.00736303	0.00010068	9.39159e-18	0.143437
12-09C	2	30	30	5.80214	0.0133274	0.00330644	0.00358453	5.76505e-15	78.6684	4.72466	0.0104682	16.459	0.0363017	0.172566	0.000200741	0.000618567	4.68452e-06	1e-06	1e-06	0.00667901	9.89538e-05	5.62739e-18	0.144884
12-09C	3	30	30	4.88056	0.0127303	0.00339091	0.000513408	7.05142e-15	93.5203	4.72002	0.00696318	16.443	0.0241472	0.205199	0.000251752	0.000105351	2.45636e-06	1e-06	1e-06	0.00684964	9.59418e-05	7.66246e-18	0.142191
12-09C	4	30	30	5.08444	0.0128223	0.00359159	0.0011967	8.04861e-15	90.2412	4.7199	0.00801307	16.4425	0.027788	0.196959	0.000271989	0.000235701	2.57983e-06	1e-06	1e-06	0.00725501	9.96953e-05	1.00812e-17	0.142851
12-09C	5	30	30	4.81468	0.0126549	0.00360692	0.000317207	5.24884e-15	93.5369	4.71272	0.00677302	16.4176	0.023488	0.208011	0.000231754	6.59826e-05	2.8891e-06	1e-06	1e-06	0.00728597	0.000107456	4.8353e-18	0.141869
12-09C	6	30	30	5.0473	0.0128171	0.00410494	0.00103927	6.12883e-15	90.2822	4.72976	0.0090299	16.4767	0.0313136	0.198411	0.000302372	0.000206201	3.1708e-06	1e-06	1e-06	0.00829198	0.000118137	6.27518e-18	0.143861
12-09C	7	30	30	5.67403	0.013285	0.00390598	0.0032409	4.05323e-15	78.796	4.69915	0.0126579	16.3706	0.0438974	0.176467	0.000287033	0.000571911	5.21126e-06	1e-06	1e-06	0.00789007	0.00013326	3.52679e-18	0.146255
12-09C	8	30	30	6.51002	0.0137699	0.00326605	0.00603508	6.79664e-15	70.3434	4.70088	0.0128995	16.3766	0.044735	0.153781	0.000203811	0.000928078	5.09425e-06	1e-06	1e-06	0.00659742	0.000102447	7.17665e-18	0.146557
12-09C	9	30	30	4.90697	0.0127653	0.0032351	0.000596528	5.37094e-15	92.1189	4.72162	0.00717161	16.4485	0.0248699	0.204093	0.00024571	0.000121747	2.79192e-06	1e-06	1e-06	0.00653491	0.000106468	5.06543e-18	0.142362
12-09C	10	30	30	4.82691	0.0128005	0.00340954	0.000301934	5.69821e-15	93.971	4.72952	0.00730118	16.4759	0.0253188	0.207483	0.000261083	6.26462e-05	2.82611e-06	1.54554e-05	1.03151e-05	0.00688727	0.000108979	5.9226e-18	0.14267
12-09C	11	30	30	4.92045	0.0127805	0.0029645	0.000595314	6.53774e-15	92.8516	4.73547	0.00683981	16.4965	0.0237186	0.203533	0.000244325	0.000121166	2.36569e-06	1e-06	1e-06	0.00598829	9.3371e-05	6.77618e-18	0.142567
12-09C	12	30	30	5.1956	0.0129435	0.00376735	0.00160797	6.52834e-15	87.5884	4.70827	0.00832425	16.4022	0.0288678	0.192739	0.000238074	0.000309919	3.45066e-06	1e-06	1e-06	0.00761005	0.000108431	7.17828e-18	0.14273
12-09C	13	30	30	5.05337	0.012877	0.00330913	0.00109471	6.0659e-15	89.9437	4.71928	0.00767661	16.4404	0.0266212	0.198172	0.000239947	0.00021694	3.09594e-06	1e-06	1e-06	0.00668444	0.000110558	6.28023e-18	0.142611
12-09C	14	30	30	4.82042	0.0127563	0.00284341	0.000344013	6.97655e-15	94.4224	4.71047	0.00662078	16.4098	0.0229602	0.207763	0.000251617	7.14732e-05	2.18631e-06	1.01538e-06	1.03879e-05	0.00574369	8.65687e-05	7.61283e-18	0.141717
12-09C	15	30	30	4.95231	0.012888	0.00333562	0.000790458	3.51378e-15	89.0779	4.70906	0.00952154	16.4049	0.0330198	0.202222	0.00028251	0.000159848	4.44354e-06	1.41877e-05	1.59391e-05	0.00673794	0.000130682	2.93837e-18	0.14365
12-09C	16	30	30	4.81515	0.0127795	0.00295023	0.000321208	5.33727e-15	93.5825	4.712	0.00797555	16.4152	0.0276583	0.207991	0.000281064	6.68083e-05	3.22367e-06	8.62929e-06	1.16012e-05	0.00595946	0.000107137	5.22026e-18	0.142598
12-09C	17	30	30	5.02277	0.0128262	0.00308205	0.000931385	3.53136e-15	88.4636	4.73745	0.0100639	16.5034	0.0348989	0.199381	0.000296117	0.0001857	4.52746e-06	1e-06	1e-06	0.00622573	0.000115211	3.06891e-18	0.144903
12-09C	18	30	30	5.41705	0.0131479	0.00324701	0.00228537	3.34105e-15	81.9536	4.72746	0.0118715	16.4688	0.0411678	0.184849	0.000305877	0.00042245	4.87778e-06	8.10125e-06	1.56427e-05	0.00655895	0.000123207	3.22162e-18	0.146258
12-09C	19	30	30	5.41465	0.013053	0.00320476	0.0022905	4.07418e-15	82.8279	4.72353	0.0098895	16.4551	0.0342949	0.184932	0.000213692	0.000423585	4.77312e-06	1e-06	1e-06	0.00647361	0.000112084	3.32431e-18	0.144362
12-09C	20	30	30	4.90797	0.0128068	0.00334974	0.000615743	3.94095e-15	90.6067	4.71688	0.0101501	16.4321	0.0351991	0.204051	0.000345452	0.000125643	4.00174e-06	8.0796e-07	1.32251e-05	0.00676647	0.000115828	3.22254e-18	0.14439
12-09C	21	30	30	5.14136	0.0130322	0.00439126	0.00138386	3.57357e-15	86.3074	4.72093	0.0100248	16.4461	0.0347644	0.194776	0.000266888	0.000269542	4.67374e-06	2.31393e-05	1.45848e-05	0.00887035	0.000150417	3.09346e-18	0.1444
12-09C	22	30	30	4.82819	0.0127956	0.00771723	0.000271449	4.59372e-15	93.2358	4.7399	0.00854009	16.5119	0.0296145	0.207428	0.00029376	5.63063e-05	3.56506e-06	1.56839e-05	1.24146e-05	0.0155888	0.000212241	4.28963e-18	0.143793
	TB-435			Inverse Isochron Age (Ma):	16.457
	Tuff of Oregon Canyon			Error (2s):	0.017
	J-Factor:	0.00194022		MSWD:	1.69
	err:	1.66186e-05		# of grains included:	22

## Sheet: 12-10C
	Step	Power (%)	Time (s)	40Ar/39Ar	38Ar/39Ar	37Ar/39Ar	36Ar/39Ar	39ArK (mol)	%40Ar*	40Ar/39ArK	± 1σ	Age (Ma)	± 1σ	39Ar/40Ar	± 1σ	36Ar/40Ar	± 1σ	Cl/K	± 1σ	Ca/K	± 1σ	39Ar total err	Age total err (in Ma)
12-10C	1	30	30	8.07414	0.0148859	0.00207	0.0115	1.48e-15	52.4518	4.63569	0.0357	16.1593	0.124021	0.123964	0.000369	0.00142	1.18e-05	8.67e-06	2.4e-05	0.00418	0.000152	1.56e-18	0.185332
12-10C	2	30	30	4.80534	0.0127	0.0017	0.000267	3.58e-15	92.1423	4.71826	0.00877	16.4458	0.0304465	0.208416	0.000278	5.57e-05	4.19e-06	1e-06	1e-06	0.00344	8.83e-05	2.98e-18	0.143419
12-10C	3	30	30	4.79231	0.0127	0.00174	0.000272	5.89e-15	94.3825	4.70376	0.00719	16.3955	0.025	0.208983	0.000247	5.69e-05	3.11e-06	1e-06	1e-06	0.00352	8.08e-05	6.06e-18	0.141935
12-10C	4	30	30	4.82042	0.0127	0.00266	0.000389	4.18e-15	92.2706	4.69714	0.00862	16.3726	0.0299	0.207763	0.00028	8.07e-05	3.95e-06	1e-06	1e-06	0.00537	0.000104	3.84e-18	0.142699
12-10C	5	30	30	4.85079	0.0128	0.0026	0.000437	3.14e-15	90.4535	4.7131	0.0115	16.4279	0.0398	0.20646	0.00039	9.02e-05	4.79e-06	6.91e-06	1.38e-05	0.00525	0.000117	2.74e-18	0.145546
12-10C	6	30	30	5.00646	0.0129	0.00227	0.000894	3.83e-15	89.2664	4.73229	0.0125	16.4945	0.0434	0.200032	0.000432	0.000179	4.26e-06	1.84e-05	1.36e-05	0.00458	9.52e-05	3.25e-18	0.147114
12-10C	7	30	30	4.90869	0.0129	0.00301	0.000527	3.11e-15	89.9947	4.74404	0.0142967	16.5353	0.0496	0.204022	0.000517	0.000108	4.83e-06	3.8e-05	1.66e-05	0.00608	0.000128	2.6e-18	0.149385
12-10C	8	30	30	4.97267	0.0127	0.00285	0.000734	1.29e-15	81.4858	4.74624	0.0214	16.5429	0.0741	0.201393	0.000584	0.000148	1.07e-05	1e-06	1e-06	0.00575	0.000243	2.61e-18	0.159282
12-10C	9	30	30	4.79127	0.0128	0.00284	0.000248	2.84e-15	90.7644	4.7099	0.0150723	16.4168	0.0522977	0.209029	0.000533	5.19e-05	6.19e-06	1.54e-05	1.82e-05	0.00574	0.00012	2.48e-18	0.149359
12-10C	10	30	30	5.69915	0.0133	0.00281	0.00331	4.13e-15	78.7434	4.70259	0.0108	16.3915	0.0376	0.175688	0.000208	0.000582	5.04e-06	1e-06	1e-06	0.00567	0.000112	3.7e-18	0.144653
12-10C	11	30	30	4.85861	0.0128	0.00229	0.000466	5.22e-15	92.8541	4.71216	0.008	16.4247	0.0277	0.206127	0.000266	9.61e-05	3.43e-06	1e-06	1e-06	0.00463	8.23e-05	5.09e-18	0.142694
12-10C	12	30	30	5.44565	0.0131	0.00143	0.00253	6.54e-15	83.3428	4.6823	0.00866	16.3211	0.0301	0.183877	0.000224	0.000466	3.49e-06	1e-06	1e-06	0.0029	5.68e-05	6.86e-18	0.142303
12-10C	13	30	30	5.19933	0.013	0.00182	0.00164	5.45e-15	86.9857	4.7028	0.00864	16.3922	0.03	0.192601	0.000237	0.000316	3.78e-06	1e-06	1e-06	0.00367	7.57e-05	5.44e-18	0.142875
12-10C	14	30	30	5.08817	0.0129	0.00259	0.00132	2.55e-15	84.7522	4.68729	0.0151	16.3384	0.0524997	0.196815	0.000441	0.000259	6.59e-06	1e-06	1e-06	0.0052344	0.000116	2.24e-18	0.148808
12-10C	15	30	30	5.33213	0.0133	0.0024	0.00209	1.58e-15	77.9792	4.70107	0.0199	16.3862	0.0691	0.187798	0.000474	0.000392	9.29e-06	5.42e-05	4.05e-05	0.00485	0.000221	2.33e-18	0.155796
12-10C	16	30	30	5.06425	0.0129	0.00196	0.0012	2.93e-15	86.2392	4.69988	0.0119	16.3821	0.0413	0.197745	0.000306	0.000237	5.95e-06	6.27e-06	1.49e-05	0.00395	0.000105	2.65e-18	0.145585
12-10C	17	30	30	4.86385	0.0128	0.00203	0.000524	5.06e-15	92.3969	4.7001	0.00791	16.3828	0.0274	0.205905	0.00027	0.000108	3.25e-06	1e-06	1e-06	0.00409	7.15e-05	4.83e-18	0.142289
12-10C	18	30	30	5.10435	0.0129	0.00227	0.00143	2.17e-15	83.0378	4.66998	0.0154	16.2783	0.0533	0.19619	0.000441	0.000281	6.75e-06	1e-06	1e-06	0.00459	0.000129	1.86e-18	0.14862
12-10C	19	30	30	4.82313	0.0127	0.00234	0.000387	2.1e-15	87.7007	4.70028	0.0135	16.3835	0.0468	0.207646	0.000415	8.04e-05	6.58e-06	1e-06	1e-06	0.00472	0.000138	1.84e-18	0.147266
12-10C	20	30	30	4.79779	0.0129	0.00367	0.000312	2.15e-15	88.2408	4.69726	0.0195	16.373	0.0678	0.208744	0.000729	6.52e-05	7.07e-06	4.03e-05	1.92e-05	0.00741	0.000168	2.13e-18	0.15514
12-10C	21	30	30	4.81928	0.0127	0.00431	0.000308	3.28e-15	91.4224	4.71994	0.0106	16.4517	0.0366	0.207812	0.000328	6.41e-05	5.11e-06	1e-06	1e-06	0.00871	0.00014	2.94e-18	0.144907
	TB-225A			Inverse Isochron Age (Ma):	16.423
	Tuff of Trout Creek Mountains			Error (2s):	0.021
	J-Factor:	0.00194128		MSWD:	1.72
	err:	1.66277e-05		# of grains included:	21

## Sheet: 12-11C
	Step	Power (%)	Time (s)	40Ar/39Ar	38Ar/39Ar	37Ar/39Ar	36Ar/39Ar	39ArK (mol)	%40Ar*	40Ar/39ArK	± 1σ	Age (Ma)	± 1σ	39Ar/40Ar	± 1σ	36Ar/40Ar	± 1σ	Cl/K	± 1σ	Ca/K	± 1σ	39Ar total err	Age total err (in Ma)
12-11C	1	30	30	4.81244	0.0126983	0.00122486	0.000336054	5.08914e-15	93.3374	4.70486	0.00724029	16.4151	0.0251466	0.208108	0.000254238	6.99356e-05	2.95522e-06	1e-06	1e-06	0.00247423	6.15038e-05	4.75929e-18	0.142132
12-11C	2	30	30	4.96159	0.0128342	0.0014536	0.000869804	5.89796e-15	91.0071	4.69465	0.00744309	16.3797	0.0258515	0.201843	0.000237174	0.000175564	3.14206e-06	1e-06	1e-06	0.00293627	6.40484e-05	5.71347e-18	0.141963
12-11C	3	30	30	4.90021	0.0127717	0.000876842	0.000640219	2.32957e-15	87.0889	4.70181	0.0159785	16.4045	0.0554961	0.204375	0.000569836	0.000130845	5.70571e-06	1e-06	1e-06	0.00177122	9.58457e-05	2.17913e-18	0.150412
12-11C	4	30	30	5.91289	0.013424	0.000964033	0.00408523	3.71336e-15	75.267	4.68592	0.0148061	16.3493	0.0514255	0.16933	0.000341368	0.00069175	5.18296e-06	1e-06	1e-06	0.00194735	7.20451e-05	3.29803e-18	0.148519
12-11C	5	30	30	4.80279	0.0126808	0.00194892	0.000291169	3.98612e-15	92.4305	4.70861	0.0101874	16.4282	0.035382	0.208527	0.000378765	6.07164e-05	3.69132e-06	1e-06	1e-06	0.00393681	8.9173e-05	3.71245e-18	0.144402
12-11C	6	30	30	5.85672	0.0134176	0.000953119	0.00384615	3.49879e-15	75.9626	4.70113	0.012092	16.4022	0.0419975	0.170956	0.00022411	0.000657521	5.42233e-06	1.27173e-06	1.60702e-05	0.0019253	7.5148e-05	3.05042e-18	0.145953
12-11C	7	30	30	4.90079	0.0128053	0.00128841	0.000582352	5.94711e-15	92.613	4.71968	0.00776077	16.4666	0.0269535	0.204351	0.000273604	0.000119004	2.85135e-06	2.14512e-06	1.05501e-05	0.00260259	5.61062e-05	6.03659e-18	0.142891
12-11C	8	30	30	7.01069	0.0141035	0.000999494	0.00783115	5.23988e-15	64.5057	4.6653	0.0130694	16.2777	0.0453956	0.142787	0.000152548	0.00111818	5.26204e-06	1e-06	1e-06	0.00201898	5.80181e-05	5.11649e-18	0.145963
12-11C	9	30	30	4.80762	0.0127592	0.00151761	0.000328862	4.37112e-15	92.6835	4.70219	0.00974277	16.4059	0.0338383	0.208317	0.000377572	6.85076e-05	3.0614e-06	2.59737e-06	1.38813e-05	0.00306557	8.30559e-05	3.99466e-18	0.143848
12-11C	10	30	30	4.8666	0.0127469	0.00167472	0.000551664	3.89796e-15	90.9001	4.69464	0.00887152	16.3796	0.0308127	0.205789	0.000271004	0.000113526	4.23761e-06	1e-06	1e-06	0.00338294	7.81321e-05	3.90236e-18	0.142949
12-11C	11	30	30	4.83213	0.0127707	0.00182572	0.000409147	3.83663e-15	91.5834	4.70273	0.0086057	16.4077	0.029889	0.207259	0.000281877	8.47994e-05	3.86663e-06	1.59976e-06	1.26586e-05	0.00368796	8.8035e-05	3.86642e-18	0.142986
12-11C	12	30	30	4.91771	0.0128386	0.0013609	0.00066602	4.39002e-15	90.9169	4.71161	0.00810579	16.4386	0.0281522	0.203647	0.000248587	0.000135633	3.7255e-06	7.00381e-06	1.29204e-05	0.00274902	7.06474e-05	4.00985e-18	0.142889
12-11C	13	30	30	4.98692	0.0128069	0.00267084	0.000983629	4.76674e-15	89.5877	4.68599	0.0093954	16.3496	0.0326328	0.200816	0.000320123	0.000197529	3.39502e-06	1e-06	1e-06	0.00539509	9.15589e-05	4.33952e-18	0.143104
12-11C	14	30	30	5.62614	0.0131505	0.00148432	0.00314676	2.53679e-15	76.9119	4.67937	0.0140172	16.3266	0.0486863	0.177971	0.000278178	0.000560031	6.57053e-06	1e-06	1e-06	0.00299832	0.000103361	2.24076e-18	0.147411
12-11C	15	30	30	4.80027	0.0125926	0.000725003	0.00033802	3.55848e-15	91.5226	4.6921	0.0107807	16.3708	0.037444	0.208636	0.000398731	7.05232e-05	3.97474e-06	1e-06	1e-06	0.00146451	6.65936e-05	3.4588e-18	0.144451
12-11C	16	30	30	5.16498	0.0129898	0.00152045	0.00152944	3.44618e-15	85.4422	4.70109	0.0107524	16.402	0.0373448	0.193884	0.000263475	0.000296533	5.31026e-06	3.78234e-06	1.50406e-05	0.00307131	7.90295e-05	2.78024e-18	0.144681
12-11C	17	30	30	5.0307	0.0128694	0.00142889	0.00106451	4.50025e-15	88.9728	4.70562	0.00975351	16.4178	0.0338753	0.199066	0.000306053	0.000211909	3.98485e-06	1e-06	1e-06	0.00288635	6.60233e-05	3.99396e-18	0.143955
12-11C	18	30	30	4.80219	0.0126584	0.00175804	0.000336167	5.1401e-15	93.3651	4.69458	0.00731451	16.3794	0.0254049	0.208553	0.000252992	7.01086e-05	3.09899e-06	1e-06	1e-06	0.00355125	6.80154e-05	5.118e-18	0.14188
12-11C	19	30	30	4.8877	0.0127107	0.00118211	0.000596592	5.78628e-15	92.4117	4.70233	0.00709362	16.4063	0.0246373	0.204899	0.000248028	0.000122241	2.69876e-06	1e-06	1e-06	0.00238786	5.23126e-05	6.02591e-18	0.141969
12-11C	20	30	30	4.8547	0.0127823	0.00153217	0.00051336	3.06244e-15	89.6858	4.69418	0.0118331	16.378	0.0410989	0.206294	0.000386784	0.000105903	5.2394e-06	1e-06	1e-06	0.00309497	9.37164e-05	2.57797e-18	0.1455
12-11C	21	30	30	4.97233	0.0128395	0.00179516	0.000909835	4.54955e-15	89.7807	4.69343	0.00840361	16.3754	0.0291876	0.201407	0.000256715	0.000183247	3.73704e-06	1e-06	1e-06	0.00362621	7.77676e-05	4.25213e-18	0.142573
12-11C	22	30	30	5.33426	0.0142815	0.00304967	0.00232193	1.84616e-16	40.3997	4.63376	0.106253	16.1682	0.369081	0.187722	0.00164822	0.000435878	6.01064e-05	0.000320201	0.000158796	0.00616034	0.00165962	8.65033e-19	0.393965
	TB-265B			Inverse Isochron Age (Ma):	16.412
	Tuff of Trout Creek Mountains			Error (2s):	0.017
	J-Factor:	0.00194314		MSWD:	0.91
	err:	1.66436e-05		# of grains included:	22

[truncated: 39 more sheets: 12-12C, 12-13C, 12-14C, 12-16C, 12-17C, 12-18C, 12-19C, 12-20C, 12-21C, 12-26C, 12-02D, 12-03D, 12-04D, 12-05D, 12-06D, 12-07D, 12-09D, 12-10D, 12-11D, 12-12D …]
